# Supplementary material
Source: PubMed Central journal article supplement (PMC4056936)

## Supporting Information

### Synthesis and Biological Evaluation of a New Calcium Channel Agonist

Mary Liang,<sup>†</sup> Tyler B. Tarr<sup>‡</sup>, Karla Bravo-Altamirano,<sup>†</sup> Guillermo Valdomir,<sup>†</sup> Gabriel Rensch,<sup>†</sup> Lauren Swanson,<sup>†</sup> Nicholas R. DeStefino<sup>‡</sup>, Cara M. Mazzarisi<sup>‡</sup>, Rachel A. Olszewski<sup>‡</sup>, Gabriela Mustata Wilson,<sup>§</sup> Stephen D. Meriney,<sup>\*,‡</sup> and Peter Wipf<sup>\*,†</sup>

<sup>†</sup>Department of Chemistry, <sup>‡</sup>Department of Neuroscience and Center for Neuroscience, and <sup>§</sup>Department of Computational and Systems Biology, University of Pittsburgh, Pittsburgh PA 15260, United States of America

#### Contents

|                                                                                                                   |    |
|-------------------------------------------------------------------------------------------------------------------|----|
| General Information .....                                                                                         | 3  |
| 2,6-Dichloro-9-propyl-9 <i>H</i> -purine ( <b>15a</b> ).....                                                      | 4  |
| <i>N</i> -(Biphenyl-4-ylmethyl)-2-chloro-9-propyl-9 <i>H</i> -purin-6-amine ( <b>16a</b> ) .....                  | 4  |
| ( <i>R</i> )-2-(6-(Biphenyl-4-ylmethylamino)-9-propyl-9 <i>H</i> -purin-2-ylamino)butan-1-ol ( <b>13a</b> ) ..... | 5  |
| 2-Chloro- <i>N</i> -(2,2-diphenylethyl)-9-propyl-9 <i>H</i> -purin-6-amine ( <b>16b</b> ) .....                   | 6  |
| ( <i>R</i> )-2-(6-(2,2-Diphenylethylamino)-9-propyl-9 <i>H</i> -purin-2-ylamino)butan-1-ol ( <b>13b</b> ) .....   | 7  |
| 2-Chloro- <i>N</i> -phenethyl-9-propyl-9 <i>H</i> -purin-6-amine ( <b>16c</b> ) .....                             | 7  |
| ( <i>R</i> )-2-(6-(Phenethylamino)-9-propyl-9 <i>H</i> -purin-2-ylamino)butan-1-ol ( <b>13c</b> ) .....           | 8  |
| <i>N</i> -Benzyl-2-chloro-9-propyl-9 <i>H</i> -purin-6-amine ( <b>16d</b> ).....                                  | 9  |
| 3( <i>R</i> )-2-(6-(Benzylamino)-9-propyl-9 <i>H</i> -purin-2-ylamino)butan-1-ol ( <b>13d</b> ) .....             | 9  |
| 2-Chloro- <i>N</i> -phenyl-9-propyl-9 <i>H</i> -purin-6-amine ( <b>16e</b> ) .....                                | 10 |
| ( <i>R</i> )-2-(6-(Phenylamino)-9-propyl-9 <i>H</i> -purin-2-ylamino)butan-1-ol ( <b>13e</b> ) .....              | 11 |
| 2-Chloro-9-propyl- <i>N</i> -(pyridin-3-ylmethyl)-9 <i>H</i> -purin-6-amine ( <b>16f</b> ) .....                  | 11 |
| ( <i>R</i> )-2-(9-Propyl-6-(pyridin-3-ylmethylamino)-9 <i>H</i> -purin-2-ylamino)butan-1-ol ( <b>13f</b> ).....   | 12 |
| 2-Chloro- <i>N</i> -(cyclopropylmethyl)-9-propyl-9 <i>H</i> -purin-6-amine ( <b>16g</b> ) .....                   | 13 |
| ( <i>R</i> )-2-(6-(Cyclopropylmethylamino)-9-propyl-9 <i>H</i> -purin-2-ylamino)butan-1-ol ( <b>13g</b> ) .....   | 13 |
| 2,6-Dichloro-9-methyl-9 <i>H</i> -purine ( <b>15b</b> ).....                                                      | 14 |
| Methyl <i>N</i> -(Biphenyl-4-ylmethyl)-2-chloro-9-methyl-9 <i>H</i> -purin-6-amine ( <b>16h</b> ).....            | 15 |
| ( <i>R</i> )-2-(6-(Biphenyl-4-ylmethylamino)-9-methyl-9 <i>H</i> -purin-2-ylamino)butan-1-ol ( <b>13h</b> ) ..... | 15 |
| 2-Chloro- <i>N</i> -(2,2-diphenylethyl)-9-methyl-9 <i>H</i> -purin-6-amine ( <b>16i</b> ).....                    | 16 |
| ( <i>R</i> )-2-(6-(2,2-Diphenylethylamino)-9-methyl-9 <i>H</i> -purin-2-ylamino)butan-1-ol ( <b>13i</b> ).....    | 17 |

|                                                                                                                                |    |
|--------------------------------------------------------------------------------------------------------------------------------|----|
| 2-Chloro-9-methyl- <i>N</i> -phenethyl-9 <i>H</i> -purin-6-amine ( <b>16j</b> ) .....                                          | 17 |
| ( <i>R</i> )-2-(9-Methyl-6-(phenethylamino)-9 <i>H</i> -purin-2-ylamino)butan-1-ol ( <b>13j</b> ).....                         | 18 |
| <i>N</i> -Benzyl-2-chloro-9-methyl-9 <i>H</i> -purin-6-amine ( <b>16k</b> ).....                                               | 19 |
| ( <i>R</i> )-2-(6-(Benzylamino)-9-methyl-9 <i>H</i> -purin-2-ylamino)butan-1-ol ( <b>13k</b> ) .....                           | 19 |
| 2-Chloro-9-methyl- <i>N</i> -phenyl-9 <i>H</i> -purin-6-amine ( <b>16l</b> ) .....                                             | 20 |
| ( <i>R</i> )-2-(9-Methyl-6-(phenylamino)-9 <i>H</i> -purin-2-ylamino)butan-1-ol ( <b>13l</b> ).....                            | 21 |
| 2-Chloro- <i>N</i> -(cyclopropylmethyl)-9-methyl-9 <i>H</i> -purin-6-amine ( <b>16m</b> ) .....                                | 21 |
| ( <i>R</i> )-2-(6-(Cyclopropylmethylamino)-9-methyl-9 <i>H</i> -purin-2-ylamino)butan-1-ol ( <b>13m</b> ) .....                | 22 |
| 2-Chloro-9-methyl- <i>N</i> -(pyridin-3-ylmethyl)-9 <i>H</i> -purin-6-amine ( <b>16n</b> ).....                                | 23 |
| ( <i>R</i> )-2-(9-Methyl-6-(pyridin-3-ylmethylamino)-9 <i>H</i> -purin-2-ylamino)butan-1-ol ( <b>13n</b> ) .....               | 23 |
| 2-Chloro-9-propyl- <i>N</i> -(4-(trifluoromethyl)benzyl)-9 <i>H</i> -purin-6-amine ( <b>16o</b> ) .....                        | 24 |
| ( <i>R</i> )-2-(9-Propyl-6-(4-(trifluoromethyl)benzylamino)-9 <i>H</i> -purin-2-ylamino)butan-1-ol ( <b>13o</b> ).....         | 25 |
| 2,6-Dichloro-9-isopropyl-9 <i>H</i> -purine ( <b>15c</b> ) .....                                                               | 26 |
| 2-Chloro- <i>N</i> -(cyclopropylmethyl)-9-isopropyl-9 <i>H</i> -purin-6-amine ( <b>16p</b> ) .....                             | 26 |
| ( <i>R</i> )-2-(6-(Cyclopropylmethylamino)-9-isopropyl-9 <i>H</i> -purin-2-ylamino)butan-1-ol ( <b>13p</b> ) .....             | 27 |
| 2-Chloro-9-isopropyl- <i>N</i> -phenethyl-9 <i>H</i> -purin-6-amine ( <b>16q</b> ) .....                                       | 28 |
| ( <i>R</i> )-2-(9-Isopropyl-6-(phenethylamino)-9 <i>H</i> -purin-2-ylamino)butan-1-ol ( <b>13q</b> ).....                      | 29 |
| 2-Chloro-9-isopropyl- <i>N</i> -(pyridin-3-ylmethyl)-9 <i>H</i> -purin-6-amine ( <b>16r</b> ).....                             | 29 |
| ( <i>R</i> )-2-(9-Isopropyl-6-(pyridin-3-ylmethylamino)-9 <i>H</i> -purin-2-ylamino)butan-1-ol ( <b>13r</b> ) .....            | 30 |
| <i>N</i> -(Biphenyl-4-ylmethyl)-2-chloro-9-isopropyl-9 <i>H</i> -purin-6-amine ( <b>16s</b> ).....                             | 31 |
| ( <i>R</i> )-2-(6-(Biphenyl-4-ylmethylamino)-9-isopropyl-9 <i>H</i> -purin-2-ylamino)butan-1-ol ( <b>13s</b> ).....            | 31 |
| <i>N</i> -Benzhydryl-2-chloro-9-isopropyl-9 <i>H</i> -purin-6-amine ( <b>16t</b> ) .....                                       | 32 |
| ( <i>R</i> )-2-(6-(Benzhydrylamino)-9-isopropyl-9 <i>H</i> -purin-2-ylamino)butan-1-ol ( <b>13t</b> ).....                     | 33 |
| 2-Chloro-9-isopropyl- <i>N</i> -((5-methylthiophen-2-yl)methyl)-9 <i>H</i> -purin-6-amine ( <b>16u</b> ) .....                 | 34 |
| ( <i>R</i> )-2-(9-Isopropyl-6-((5-methylthiophen-2-yl)methylamino)-9 <i>H</i> -purin-2-ylamino)butan-1-ol ( <b>13u</b> ) ..... | 35 |
| 2-Chloro-9-isopropyl- <i>N</i> -(3-(trifluoromethyl)benzyl)-9 <i>H</i> -purin-6-amine ( <b>16v</b> ) .....                     | 36 |
| ( <i>R</i> )-2-(9-Isopropyl-6-(3-(trifluoromethyl)benzylamino)-9 <i>H</i> -purin-2-ylamino)butan-1-ol ( <b>13v</b> ) .....     | 36 |
| 2-Chloro-9-methyl- <i>N</i> -[(5-methylthiophen-2-yl)methyl]-9 <i>H</i> -purin-6-amine ( <b>16w</b> ) .....                    | 37 |
| (2 <i>R</i> )-2-[(9-Methyl-6-[(5-methylthiophen-2-yl)methyl]amino)-9 <i>H</i> -purin-2-yl]amino]butan-1-ol ( <b>13w</b> )..... | 38 |
| 2-Chloro- <i>N</i> -[(5-methylthiophen-2-yl)methyl]-9-propyl-9 <i>H</i> -purin-6-amine ( <b>16x</b> ) .....                    | 39 |
| (2 <i>R</i> )-2-[(6-[(5-Methylthiophen-2-yl)methyl]amino)-9-propyl-9 <i>H</i> -purin-2-yl]amino]butan-1-ol ( <b>13x</b> )..... | 39 |

**General information.** All moisture and air-sensitive reactions were performed using syringe-septum cap techniques under an inert atmosphere ( $N_2$  or Ar) in glassware that was dried in an oven at 140 °C for at least 2 h prior to use. Reactions carried out at a temperature below 0 °C employed a  $CO_2$ /acetone bath. All reagents and solvents were used as received unless otherwise specified. Triethylamine, *N,N*-dimethylaniline and pyridine were distilled over  $CaH_2$ . THF and  $Et_2O$  were distilled over sodium/benzophenone ketyl. Dichloromethane and toluene were purified using an alumina column filtration system. Anhydrous MeOH and  $Et_2O$  were purchased from Acros Organics and Fisher Scientific, respectively. Anhydrous DMF was purchased from Acros Organics or distilled and stored over 4 Å molecular sieves. Analytical thin-layer chromatography (TLC) was performed on pre-coated  $SiO_2$  60 F254 plates (250  $\mu m$  layer thickness) available from Merck. Visualization was accomplished by UV irradiation at 254 nm and/or by staining with Vaughn's reagent (4.8 g  $(NH_4)_6Mo_7O_{24} \cdot 4 H_2O$  and 0.2 g  $Ce(SO_4)_2 \cdot 4 H_2O$  in 100 mL of a 3.5 N  $H_2SO_4$  solution), a  $KMnO_4$  solution (1.5 g  $KMnO_4$  and 1.5 g  $K_2CO_3$  in 100 mL of a 0.1% NaOH solution), a ninhydrin solution (2 g ninhydrin in 100 mL of EtOH), a PMA solution (5 g of phosphomolybdic acid in 100 mL of EtOH), or a *p*-anisaldehyde solution (2.5 mL of *p*-anisaldehyde, 2 mL of AcOH and 3.5 mL of conc. aq.  $H_2SO_4$  in 100 mL of EtOH). Preparative thin-layer chromatography was performed on pre-coated  $SiO_2$  GF (UV<sub>254</sub>) 1000 microns (20 x 20 cm) plates available from Analtech. Flash column chromatography was performed using  $SiO_2$  60 (particle size 0.040–0.055 mm, 230–400 mesh, or Silicycle SiliaFlash® P60, 40-63  $\mu m$ ). Melting points were determined on a Meltemp capillary melting point apparatus fitted with a Fluke 51 II digital thermometer. Infrared spectra were recorded on a Smiths IdentifyIR ATR spectrometer or a Perkin Elmer Spectrum 100 FT-IR spectrometer using the Universal ATR Sampling Accessory for both oil and solid compounds.  $^1H$  NMR and  $^{13}C$  NMR spectra were obtained on Bruker Avance 300, 400 or 600 instruments at 300/75 MHz, 400/100 MHz or 600/150 MHz, respectively. Chemical shifts were reported in parts per million (ppm) as referenced to residual solvent.  $^1H$  NMR spectra are tabulated as follows: chemical shift, multiplicity (app = apparent, b = broad, s = singlet, d = doublet, t = triplet, q = quartet, quint = quintuplet, sext = sextuplet, sept = septuplet, m = multiplet), number of protons, coupling constant(s).  $^{13}C$  NMR were obtained using a proton-decoupled pulse sequence. Mass spectra were obtained on a Waters Autospec double focusing mass spectrometer (EI) or a Waters Q-ToF mass spectrometer (ESI).

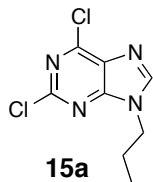

**2,6-Dichloro-9-propyl-9H-purine (15a).**<sup>1</sup> To a solution of 2,6-dichloro-9H-purine **14** (0.490 mg, 2.59 mmol) in anhydrous DMSO (3.0 mL) was added K<sub>2</sub>CO<sub>3</sub> (1.10 g, 7.96 mmol) followed by 1-bromopropane (1.62 g, 13.1 mmol) at 16-18 °C (*i*-PrOH bath in a Dewar flask covered with aluminum foil). The reaction mixture was stirred at 16-18 °C for 17 h, quenched with water and extracted with EtOAc. The combined organic layers were washed with brine, dried (MgSO<sub>4</sub>), concentrated, and purified by chromatography on SiO<sub>2</sub> (hexanes, 100%, to hexanes/EtOAc, 1:1) to yield **15a** (0.465 g, 2.01 mmol, 78% yield) as an off-white solid: IR (ATR, neat) 3677, 3078, 2974, 2939, 2880, 1596, 1553, 1496, 1466, 1442, 1408, 1383, 1370, 1347, 1312, 1270, 1229, 1196, 1180, 1141, 1084, 957, 901, 875, 860, 812, 785, 774, 681 cm<sup>-1</sup>; <sup>1</sup>H NMR (600 MHz, CDCl<sub>3</sub>) δ 8.10 (s, 1 H), 4.21 (t, 2 H, *J* = 7.2 Hz), 1.93 (sext, 2 H, *J* = 7.4 Hz), 0.94 (t, 3 H, *J* = 7.5 Hz); <sup>13</sup>C NMR (151 MHz, CDCl<sub>3</sub>) δ 153.2, 152.7, 151.5, 146.0, 46.2, 23.1, 11.1.

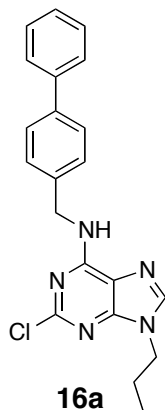

**N-(Biphenyl-4-ylmethyl)-2-chloro-9-propyl-9H-purin-6-amine (16a).**<sup>2</sup> To a solution of **15a** (58.0 mg, 0.251 mmol) in *n*-BuOH (1.0 mL) were added 4-phenylbenzylamine (52.0

<sup>1</sup> Lambertucci, C.; Cristalli, G.; Dal Ben, D.; Kachare, D. D.; Bolcato, C.; Klotz, K.-N.; Spalluto, G.; Volpini, R., "New 2,6,9-trisubstituted adenines as adenosine receptor antagonists: A preliminary SAR profile." *Purinergic Signalling* **2007**, *3*, 339-346.

<sup>2</sup> Trova, M. P.; Barnes, K. D.; Barford, C.; Benanti, T.; Bielaska, M.; Burry, L.; Lehman, J. M.; Murphy, C.; O'grady, H.; Peace, D.; Salamone, S.; Smith, J.; Snider, P.; Toporowski, J.; Tregay, S.; Wilson, A.; Wyle, M.; Zheng, X.; Friedrich, T. D. Biaryl purine derivatives as potent antiproliferative agents: Inhibitors of cyclin dependent kinases. Part I. *Bioorg. Med. Chem. Lett.* **2009**, *19*, 6608-6612.

mg, 0.267 mmol) and triethylamine (40.6 mg, 0.402 mmol) under an N<sub>2</sub> atmosphere at room temperature. The reaction mixture was heated in a microwave at 120 °C for 20 min. The solvent was evaporated, and the crude residue was dissolved in EtOAc and washed with water. The aqueous phase was further extracted with EtOAc, and the combined organic extracts were dried (MgSO<sub>4</sub>) and concentrated to yield a colorless solid, which was resuspended (hexanes/Et<sub>2</sub>O, 3:1), filtered, triturated (hexanes/Et<sub>2</sub>O, 3:1) and dried under high-vacuum to yield **16a** (86.2 mg, 0.228 mmol, 91% yield) as a colorless solid: IR (ATR, neat) 3145, 2964, 1619, 1577, 1304, 1254 cm<sup>-1</sup>; <sup>1</sup>H NMR (600 MHz, CDCl<sub>3</sub>) δ 7.56 (d, 2 H, *J* = 8.4 Hz), 7.56 (d, 2 H, *J* = 7.8 Hz), 7.47-7.40 (m, 5 H), 7.35 (t, 1 H, *J* = 7.5 Hz), 6.88 (bm, 1 H), 4.87 (bs, 2 H), 4.05 (t, 2 H, *J* = 6.6 Hz), 1.85 (sext, 2 H, *J* = 7.4 Hz), 0.91 (t, 3 H, *J* = 6.9 Hz); <sup>13</sup>C NMR (151 MHz, CDCl<sub>3</sub>) δ 155.3, 154.7, 150.4, 140.7, 140.4, 137.2, 128.9, 128.6, 127.5 (2 C), 127.2, 118.8, 45.6, 44.5, 23.4, 11.2.

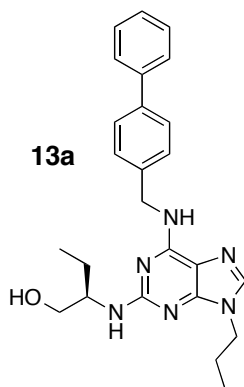

**(*R*)-2-(6-(Biphenyl-4-ylmethylamino)-9-propyl-9*H*-purin-2-ylamino)butan-1-ol (**13a**).**

A mixture of **16a** (50.0 mg, 0.128 mmol) and (*R*)-(-)-2-amino-1-butanol (60.9 mg, 0.642 mmol) was heated in a microwave vial immersed in an oil bath at 170 °C for 8 h. The reaction mixture was cooled to room temperature, diluted with water, and extracted with EtOAc (4x). The combined organic layers were washed with warmed water (50-55 °C, 2x), dried (MgSO<sub>4</sub>), concentrated, and dried under high vacuum at 50 °C (oil bath) for 2 h to yield a yellow solid. Upon the addition of Et<sub>2</sub>O to the yellow solid, an off-white solid precipitated. The solid was further washed with Et<sub>2</sub>O (3x) and dried under high-vacuum at 40 °C overnight to yield **13a** (32.6 mg, 0.0757 mmol, 59%) as an off-white solid: Mp 130-131 °C; IR (ATR, neat) 3270, 2962, 2931, 1599, 1488, 1349 cm<sup>-1</sup>; <sup>1</sup>H NMR (600 MHz, CDCl<sub>3</sub>) δ 7.57 (app d, 2 H, *J* = 7.8 Hz), 7.54 (app d, 2 H, *J* = 7.8 Hz), 7.47-7.38 (m,

4 H), 7.37-7.28 (m, 2 H), 6.46 (bs, 1 H), 5.26-5.08 (bm, 1 H), 4.97 (s, 1 H), 4.91-4.66 (bm, 2 H), 3.92 (t, 2 H,  $J = 6.9$  Hz), 3.90-3.85 (bm, 1 H), 3.81 (bd, 1 H,  $J = 12.0$  Hz), 3.63 (app t, 1 H,  $J = 9.0$  Hz), 1.82 (sext, 2 H,  $J = 7.2$  Hz), 1.67-1.49 (m, 2 H), 1.00 (t, 3 H,  $J = 7.2$  Hz), 0.91 (t, 3 H,  $J = 7.2$  Hz);  $^{13}\text{C}$  NMR (151 MHz,  $\text{CDCl}_3$ )  $\delta$  160.2, 154.9, 150.7, 140.7, 140.2, 137.9, 137.1, 128.7, 128.1, 127.2, 127.0, 114.3, 68.2, 56.2, 45.0, 44.0, 25.0, 23.1, 11.2, 10.9; HRMS ( $\text{ES}^+$ )  $m/z$  calcd for  $\text{C}_{25}\text{H}_{31}\text{N}_6\text{O}$   $[\text{M}+\text{H}]^+$  431.2559, found 431.2532.

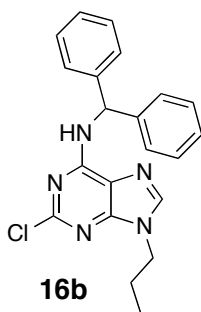

**2-Chloro-N-(2,2-diphenylethyl)-9-propyl-9H-purin-6-amine (16b).** To a solution of **15a** (71.0 mg, 0.307 mmol) in *n*-BuOH (1.0 mL) was added aminodiphenylmethane (61.5 mg, 0.326 mmol) and triethylamine (50.1 mg, 0.495 mmol) under an  $\text{N}_2$  atmosphere. The reaction mixture was heated in a microwave reactor at 120 °C for 20 min. The solvent was evaporated, and the residue was dissolved in EtOAc and washed with water. The aqueous phase was further extracted with EtOAc, and the combined organic extracts were dried ( $\text{MgSO}_4$ ) and concentrated to yield a colorless solid, which was resuspended (hexanes/ $\text{Et}_2\text{O}$ , 3:1), filtered, and triturated (hexanes/ $\text{Et}_2\text{O}$ , 3:1) to obtain an off-white solid. The filtrate was concentrated, resuspended (hexanes/ $\text{Et}_2\text{O}$ , 3:1), and filtered to obtain additional product. After drying on high-vacuum, **16b** (74.4 mg, 0.197 mmol, 65%) was obtained as an off-white solid: IR (ATR, neat) 3250, 2964, 1612, 1574, 1304, 1218  $\text{cm}^{-1}$ ;  $^1\text{H}$  NMR (600 MHz,  $\text{CDCl}_3$ )  $\delta$  7.54 (bs, 1 H), 7.35-7.20 (m, 9 H), 7.17 (s, 1 H), 6.78 (d, 1 H,  $J = 6.6$  Hz), 4.09-3.90 (bm, 2 H), 1.95-1.69 (bm, 2 H), 0.90 (t, 3 H,  $J = 6.9$  Hz);  $^{13}\text{C}$  NMR (151 MHz,  $\text{CDCl}_3$ )  $\delta$  154.4, 154.2, 150.3, 141.3, 140.4, 127.7, 127.5, 127.3, 118.5, 57.1, 45.4, 23.2, 11.0; LCMS (ESI)  $m/z$  calcd for  $\text{C}_{21}\text{H}_{21}\text{N}_5\text{Cl}$   $[\text{M}+\text{H}]^+$  378.1, found 378.1.

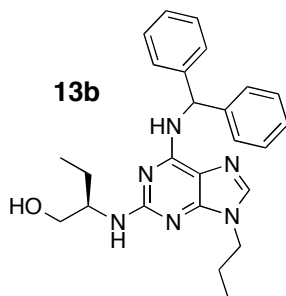

**(*R*)-2-(6-(2,2-Diphenylethylamino)-9-propyl-9*H*-purin-2-ylamino)butan-1-ol (13b).** A mixture of **16b** (50.0 mg, 0.128 mmol) and (*R*)-(-)-2-amino-1-butanol (60.9 mg, 0.642 mmol) were heated in a vial immersed in an oil bath at 170 °C for 8 h. The reaction mixture was cooled to room temperature, diluted with water, and extracted with EtOAc (4x). The combined organic phases were washed with warm water (50-55 °C, 2x), dried (MgSO<sub>4</sub>), concentrated, and dried under high-vacuum at 50 °C (oil bath) for 2 h to yield a solid-yellow oil. Upon addition of Et<sub>2</sub>O, an off-white solid precipitated. The solid was rinsed with Et<sub>2</sub>O (3x) and dried under high-vacuum at 40 °C to yield **13b** (36.9 mg, 0.0857 mmol, 67%) as an off-white solid: Mp 160-163 °C; IR (ATR, neat) 3269, 2960, 1606, 1556, 1439 cm<sup>-1</sup>; <sup>1</sup>H NMR (600 MHz, CDCl<sub>3</sub>) δ 7.40-7.26 (m, 8 H), 7.25-7.16 (m, 2 H), 6.64-6.29 (m, 2 H), 4.80 (d, 1 H, *J* = 4.8 Hz), 3.89 (t, 2 H, *J* = 6.9 Hz), 3.79-3.69 (bm, 1 H), 3.69-3.61 (bm, 1 H), 3.55-3.41 (bm, 1 H), 1.79 (sext, 2 H, *J* = 6.6 Hz), 1.61-1.37 (m, 2 H), 1.05-0.90 (m, 6 H); <sup>13</sup>C NMR (151 MHz, CDCl<sub>3</sub>) δ 160.0, 153.9, 142.2, 137.2, 128.5 (2 C), 127.6, 127.2 (2 C), 114.3, 67.7, 57.9, 56.0, 45.0, 24.8, 23.1, 11.2, 10.8; HRMS (ES<sup>+</sup>) *m/z* calcd for C<sub>25</sub>H<sub>31</sub>N<sub>6</sub>O [M+H]<sup>+</sup> 431.2559, found 431.2596.

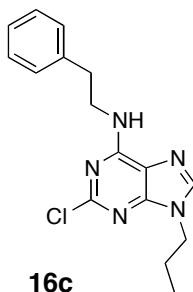

**2-Chloro-*N*-phenethyl-9-propyl-9*H*-purin-6-amine (16c).** To a solution of **15a** (58.0 mg, 0.251 mmol) in *n*-BuOH (1.0 mL) was added phenethylamine (32.8 mg, 0.269 mmol) and triethylamine (40.6 mg, 0.402 mmol) under an N<sub>2</sub> atmosphere. The reaction mixture was heated under microwave irradiation at 120 °C for 30 min. *n*-BuOH was evaporated and the residue was dissolved in EtOAc and washed with water. The aqueous phase

was further extracted with EtOAc and the combined organic layers were dried (MgSO<sub>4</sub>) and concentrated to yield a colorless solid, which was resuspended (hexanes/Et<sub>2</sub>O, 3:1), filtered, triturated (hexanes/Et<sub>2</sub>O, 3:1) and dried under high-vacuum to yield **16c** (67.0 mg, 0.212 mmol, 85%) as an amorphous off-white solid: IR (ATR, neat) 3218, 2960, 1620, 1576, 1355, 1307, 1232 cm<sup>-1</sup>; <sup>1</sup>H NMR (600 MHz, CDCl<sub>3</sub>) δ 7.47-7.30 (m, 1 H), 7.25-7.19 (m, 2 H), 7.19-7.09 (m, 3 H), 6.91-6.63 (m, 1 H), 4.15-3.98 (bm, 2 H), 3.95-3.67 (bm, 2 H), 3.00-2.87 (bm, 2 H), 1.98-1.78 (bm, 2 H), 0.92 (bt, 3 H, *J* = 6.3 Hz); <sup>13</sup>C NMR (151 MHz, CDCl<sub>3</sub>) δ 155.1, 154.4, 149.9, 139.8, 138.8, 128.7, 128.4, 126.2, 118.5, 45.3, 41.8, 35.4, 23.2, 11.0.

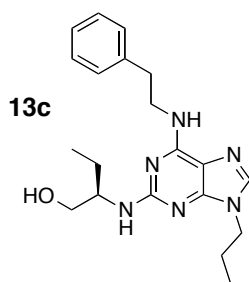

**(R)-2-(6-(Phenethylamino)-9-propyl-9H-purin-2-ylamino)butan-1-ol (13c)**. A mixture of **16c** (50.0 mg, 0.158 mmol) and (*R*)-(-)-2-amino-1-butanol (76.0 mg, 0.801 mmol) was heated in a microwave vial immersed in an oil bath at 170 °C for 7 h. The reaction mixture was cooled to room temperature, diluted with water, and extracted with EtOAc (3x). The combined organic phases were washed with warm water (50-55 °C, 2x), dried (MgSO<sub>4</sub>), concentrated, and dried under high-vacuum at 50 °C (oil bath) for 2 h to yield an oily yellow residue. Upon the addition of Et<sub>2</sub>O and a few drops of hexanes, an off-colorless solid precipitated. The solid was rinsed (Et<sub>2</sub>O, 3x) by pipetting out the supernatant, and the solid was dried under high-vacuum at 40 °C overnight to yield **13c** (18.7 mg, 0.0508 mmol, 32%) as an off-white solid: Mp 105-107 °C; IR (ATR, neat) 3276, 2956, 2929, 1603, 1520 cm<sup>-1</sup>; <sup>1</sup>H NMR (600 MHz, CDCl<sub>3</sub>) δ 7.43 (bs, 1 H), 7.40-7.32 (m, 2 H), 7.32-7.22 (m, 3 H), 5.80 (bs, 1 H), 5.40 (bs, 1 H), 5.04-4.84 (bm, 1 H), 3.99 (t, 2 H, *J* = 6.6 Hz), 3.97-3.91 (bm, 1 H), 3.91-3.75 (bm, 3 H), 3.69 (t, 1 H, *J* = 9.0 Hz), 2.99 (t, 2 H, *J* = 6.3 Hz), 1.89 (sext, 2 H, *J* = 6.6 Hz), 1.75-1.55 (m, 2 H), 1.08 (t, 3 H, *J* = 7.2 Hz), 0.98 (t, 3 H, *J* = 7.2 Hz); <sup>13</sup>C NMR (151 MHz, CDCl<sub>3</sub>) δ 160.2, 154.9, 139.0, 137.0, 128.8, 128.6, 126.4, 114.4, 68.6, 56.4, 45.0, 41.7, 35.9, 25.0, 23.2, 11.2, 10.9; HRMS (ES<sup>+</sup>) *m/z* calcd for C<sub>20</sub>H<sub>29</sub>N<sub>6</sub>O [M+H]<sup>+</sup> 369.2403, found 369.2422.



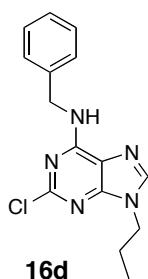

***N*-Benzyl-2-chloro-9-propyl-9*H*-purin-6-amine (16d).** To a solution of **15a** (63.0 mg, 0.273 mmol) in *n*-BuOH (1.0 mL) was added benzylamine (31.4 mg, 0.287 mmol) and triethylamine (43.6 mg, 0.430 mmol) under an N<sub>2</sub> atmosphere. The reaction mixture was heated under microwave irradiation at 120 °C for 30 min. *n*-BuOH was evaporated, and the residue was dissolved in EtOAc and washed with water. The aqueous phase was further extracted with EtOAc and the combined organic extracts were dried (MgSO<sub>4</sub>) and concentrated to yield a colorless solid, which was resuspended (hexanes/Et<sub>2</sub>O, 3:1), filtered, triturated (hexanes/Et<sub>2</sub>O, 3:1), and dried under high-vacuum to yield **16d** (66.3 mg, 0.220 mmol, 81%) as a colorless solid: IR (ATR, neat) 3189, 2966, 1623, 1304, 1253 cm<sup>-1</sup>; <sup>1</sup>H NMR (600 MHz, CDCl<sub>3</sub>) δ 7.44-7.27 (m, 6 H), 7.10-6.75 (bm, 1 H), 4.82 (bs, 2 H), 4.20-4.00 (bm, 2 H), 1.95-1.80 (bm, 2 H), 0.93 (t, 3 H, *J* = 6.6 Hz); <sup>13</sup>C NMR (151 MHz, CDCl<sub>3</sub>) δ 155.1, 154.5, 150.2, 140.2, 138.0, 128.6, 127.9, 127.5, 118.6, 45.4, 44.6, 23.3, 11.1.

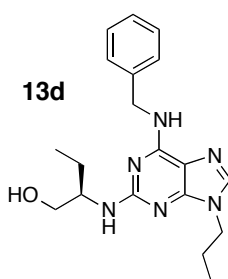

**(*R*)-2-(6-(Benzylamino)-9-propyl-9*H*-purin-2-ylamino)butan-1-ol (13d).** A mixture of **16d** (50.0 mg, 0.166 mmol) and (*R*)-(-)-2-amino-1-butanol (78.9 mg, 0.831 mmol) was heated in a microwave vial immersed in an oil bath at 170 °C for 7 h. The reaction mixture was cooled to room temperature, diluted with water, and extracted with EtOAc (3x). The combined organic phases were washed with warm water (50-55 °C, 2x) dried (MgSO<sub>4</sub>), concentrated, and dried under high-vacuum at 50 °C (oil bath) for 2 h to yield a

yellow solid. Upon the addition of Et<sub>2</sub>O to the yellow solid, an off-white solid precipitated. The solid was rinsed (Et<sub>2</sub>O, 3x) by pipetting out the supernatant and dried under high-vacuum at 40 °C overnight to yield **13d** (38.6 mg, 0.109 mmol, 66%) as an off-white solid: Mp 153-155 °C; IR (ATR, neat) 3262, 3201, 2961, 1624, 1603, 1513 cm<sup>-1</sup>; <sup>1</sup>H NMR (CDCl<sub>3</sub>, 600 MHz) δ 7.23-7.40 (m, 6 H), 6.22 (bs, 1 H), 5.19 (bs, 1 H), 4.88-4.96 (m, 1 H), 4.75 (bs, 2 H), 3.92-3.97 (m, 2 H), 3.85-3.92 (m, 1 H), 3.81 (d, 1 H, *J* = 10.8 Hz), 3.62 (t, 1 H, *J* = 8.7 Hz), 1.90-1.80 (m, 2 H), 1.70-1.50 (m, 2 H), 1.02 (t, 3 H, *J* = 7.2 Hz), 0.94 (t, 3 H, *J* = 6.6 Hz); <sup>13</sup>C NMR (CDCl<sub>3</sub>, 150 MHz) δ 160.2, 154.8, 150.6, 138.7, 137.1, 128.5, 127.7, 127.3, 114.3, 68.4, 56.3, 45.0, 44.4, 25.0, 23.2, 11.2, 10.9; HRMS (ES) *m/z* calcd for C<sub>19</sub>H<sub>26</sub>N<sub>6</sub>O [M+H] 355.2246, found 355.2241.

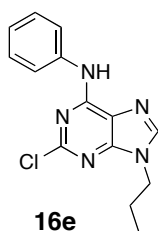

**2-Chloro-N-phenyl-9-propyl-9H-purin-6-amine (16e).** To a solution of **15a** (72.0 mg, 0.312 mmol) in *n*-BuOH (1.0 mL) were added aniline (30.2 mg, 0.324 mmol) and triethylamine (50.1 mg, 0.495 mmol) under an N<sub>2</sub> atmosphere. The reaction mixture was heated under microwave irradiation at 120 °C for 30 min. *n*-BuOH was evaporated, and the residue was dissolved in EtOAc and washed with water. The aqueous phase was further extracted with EtOAc, and the combined organic extracts were dried (MgSO<sub>4</sub>) and concentrated to yield a colorless solid. The solid was resuspended (hexanes/Et<sub>2</sub>O, 3:1), filtered, triturated (hexanes/Et<sub>2</sub>O, 3:1), and dried under high-vacuum to yield **16e** (52.7 mg, 0.183 mmol, 59%) as an off-white amorphous solid: IR (ATR, neat) 3179, 2967, 1611, 1572, 1346, 1301 cm<sup>-1</sup>; <sup>1</sup>H NMR (CDCl<sub>3</sub>, 600 MHz) δ 8.31 (bs, 1 H), 7.67-7.81 (m, 3 H), 7.36 (t, 2 H, *J* = 7.8 Hz), 7.12 (t, 1 H, *J* = 7.2 Hz), 4.11 (t, 2 H, *J* = 7.2 Hz), 1.89 (sext, 2 H, *J* = 7.2 Hz), 0.94 (t, 3 H, *J* = 7.2 Hz); <sup>13</sup>C NMR (CDCl<sub>3</sub>, 150 MHz) δ 153.9, 152.3, 150.7, 141.0, 138.0, 128.9, 123.9, 120.3, 119.1, 45.5, 23.2, 11.0.

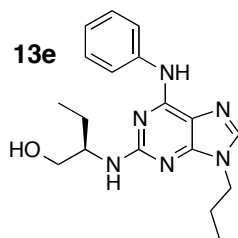

**(R)-2-(6-(Phenylamino)-9-propyl-9H-purin-2-ylamino)butan-1-ol (13e).** A mixture of **16e** (41.0 mg, 0.142 mmol) and (*R*)-(-)-2-amino-1-butanol (68.4 mg, 0.721 mmol) was heated in a microwave vial immersed in an oil bath at 170 °C for 12 h. The reaction mixture was cooled to room temperature, diluted with water, and extracted with EtOAc (3x). The combined organic phases were washed with warm water (50-55 °C, 2x), dried (MgSO<sub>4</sub>), concentrated, and dried under high-vacuum to yield a light-green solid. The crude solid was adsorbed onto SiO<sub>2</sub> and purified by chromatography on SiO<sub>2</sub> (hexanes/EtOAc, 1:1 to EtOAc, 100% with 1% Et<sub>3</sub>N to 10% MeOH in EtOAc with 1% Et<sub>3</sub>N) to yield **13e** (23.6 mg, 0.0693 mmol, 49%) as an off-white solid: Mp 190-194 °C; IR (ATR, neat) 3338, 2970, 1644, 1583, 1498, 1474, 1442 cm<sup>-1</sup>; <sup>1</sup>H NMR (CDCl<sub>3</sub>, 600 MHz) δ 7.75 (d, 2 H, *J* = 7.8 Hz), 7.65 (bs, 1 H), 7.51 (s, 1 H), 7.35 (t, 2 H, *J* = 7.8 Hz), 7.08 (t, 1 H, *J* = 7.8 Hz), 5.03 (d, 1 H, *J* = 6.6 Hz), 3.93-4.02 (m, 3 H), 3.87 (dd, 1 H, *J* = 10.8, 1.8 Hz), 3.68 (dd, 1 H, *J* = 10.8, 7.2 Hz), 1.87 (sext, 2 H, *J* = 7.2 Hz), 1.57-1.73 (m, 2 H), 1.05 (t, 3 H, *J* = 7.2 Hz), 0.96 (t, 3 H, *J* = 7.2 Hz); <sup>13</sup>C NMR δ (CDCl<sub>3</sub>, 150 MHz) δ 159.9, 152.4, 150.9, 139.0, 137.6, 128.9, 123.0, 120.0, 114.8, 56.1, 45.1, 29.7, 25.0, 23.2, 11.2, 10.9; HRMS (EI) *m/z* calcd for C<sub>18</sub>H<sub>24</sub>N<sub>6</sub>O 340.2012 found 340.2009.

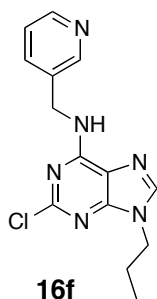

**2-Chloro-9-propyl-N-(pyridin-3-ylmethyl)-9H-purin-6-amine (16f).** To a solution of **15a** (58.0 mg, 0.251 mmol) in *n*-BuOH (1.0 mL) were added 3-(aminomethyl)pyridine (28.6 mg, 0.265 mmol) and triethylamine (40.6 mg, 0.402 mmol) under an N<sub>2</sub> atmosphere. The reaction mixture was heated under microwave irradiation at 120 °C for 30 min. *n*-BuOH was evaporated, and the residue was dissolved in EtOAc and washed

with water. The aqueous phase was further extracted with EtOAc, and the combined organic extracts were dried (MgSO<sub>4</sub>) and concentrated to yield a colorless solid. The solid was resuspended (hexanes/Et<sub>2</sub>O, 3:1), filtered, triturated (hexanes/Et<sub>2</sub>O, 3:1), and dried under high-vacuum to yield **16f** (53.9 mg, 0.178 mmol, 71%) as a yellow amorphous solid: IR (ATR, neat) 3155, 2964, 1626, 1572, 1308, 1232 cm<sup>-1</sup>; <sup>1</sup>H NMR (CDCl<sub>3</sub>, 600 MHz) δ 8.57 (s, 1 H), 8.52-8.44 (m, 1 H), 7.64 (d, 1 H, *J* = 7.8 Hz), 7.50 (bs, 1 H), 7.33 (s, 1 H), 7.18 (dd, 1 H, *J* = 7.2, 4.8 Hz), 4.79 (bs, 2 H), 4.05 (t, 2 H, *J* = 7.2 Hz), 1.83 (sext, 2 H, *J* = 7.2 Hz), 0.89 (t, 3 H, *J* = 7.2 Hz); <sup>13</sup>C NMR (CDCl<sub>3</sub>, 150 MHz) δ 154.9, 154.3, 151.0, 149.2, 148.8, 140.2, 135.5, 133.7, 123.4, 118.5, 45.4, 41.8, 23.2, 11.0.

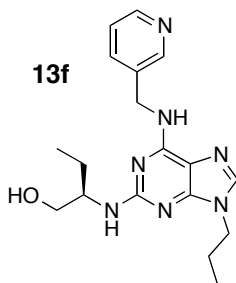

**(*R*)-2-(9-Propyl-6-(pyridin-3-ylmethylamino)-9*H*-purin-2-ylamino)butan-1-ol (13f).** A mixture of **16f** (35.0 mg, 0.116 mmol) and (*R*)-(-)-2-amino-1-butanol (55.1 mg, 0.581 mmol) was heated in a microwave vial immersed in an oil bath at 170 °C for 12 h. The reaction mixture was cooled to room temperature, diluted with water, and extracted with EtOAc (3x). The combined organic phases were washed with warm water (50-55 °C, 2x), dried (MgSO<sub>4</sub>), concentrated, and dried under high-vacuum to yield an oily yellow residue. Upon the addition of Et<sub>2</sub>O and hexanes (drops), a sticky, yellow solid precipitated. The solid was carefully crushed with a glass rod to yield an off-white solid, which was rinsed with Et<sub>2</sub>O (3x) by pipetting out the supernatant and dried under high-vacuum overnight to yield **13f** (27.0 mg, 0.0760 mmol, 66%) as an off-white solid: Mp 129-132 °C; IR (ATR, neat) 3257, 3209, 2964, 1601, 1530, 1477 cm<sup>-1</sup>; <sup>1</sup>H NMR (CDCl<sub>3</sub>, 600 MHz) δ 8.68 (s, 1 H), 8.54 (d, 1 H, *J* = 4.8 Hz), 7.73 (d, 1 H, *J* = 7.8 Hz), 7.46 (s, 1 H), 7.30-7.28 (m, 1 H), 5.99 (bs, 1 H), 4.89-4.86 (m, 1 H), 4.81 (bs, 2 H), 4.00 (t, 2 H, *J* = 7.2 Hz), 3.92-3.86 (m, 1 H), 3.81 (d, 1 H, *J* = 10.2 Hz), 3.63 (dd, 1 H, *J* = 10.2, 7.8 Hz), 1.89 (sext, 2 H, *J* = 7.2 Hz), 1.73-1.63 (m, 2 H), 1.63-1.53 (m, 1 H), 1.04 (t, 3 H, *J* = 7.2 Hz), 0.97 (t, 3 H, *J* = 7.2 Hz); <sup>13</sup>C NMR (CDCl<sub>3</sub>, 150 MHz) δ 160.1, 154.7, 150.9, 149.3,

148.6, 137.3, 135.3, 134.5, 123.4, 114.3, 67.9, 56.1, 45.1, 41.8, 24.9, 23.1, 11.2, 10.9;  
HRMS (EI)  $m/z$  calcd for  $C_{18}H_{25}N_7O$  355.2121, found 355.2124.

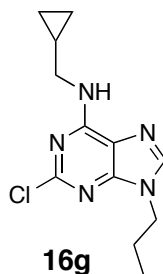

**2-Chloro-N-(cyclopropylmethyl)-9-propyl-9H-purin-6-amine (16g).** To a solution of **15a** (80.0 mg, 0.346 mmol) in *n*-BuOH (1 mL) were added aminomethylcyclopropane (28.7 mg, 0.391 mmol) and triethylamine (56.6 mg, 0.560 mmol) under an  $N_2$  atmosphere. The reaction mixture was heated under microwave irradiation at 120 °C for 30 min. *n*-BuOH was evaporated, and the residue was dissolved in EtOAc and washed with water. The aqueous phase was further extracted with EtOAc, and the combined organic extracts were dried ( $MgSO_4$ ), filtered, concentrated, and dried under high-vacuum overnight to yield **16g** (87.1 mg, 0.328 mmol, 95%) as an amorphous colorless solid: IR (ATR, neat) 3260, 2970, 1621, 1578, 1302, 1253  $cm^{-1}$ ;  $^1H$  NMR ( $CDCl_3$ , 600 MHz)  $\delta$  7.67 (s, 1 H), 6.26 (bs, 1 H), 4.06 (t, 2 H,  $J = 7.2$  Hz), 3.45-3.35 (m, 2 H), 1.84 (sext, 2 H,  $J = 7.2$  Hz), 1.10-1.00 (m, 1 H), 0.89 (t, 2 H,  $J = 7.2$  Hz), 0.48 (dd, 2 H,  $J = 13.8, 4.8$  Hz), 0.23 (dd, 2 H,  $J = 9.6, 4.8$  Hz);  $^{13}C$  NMR ( $CDCl_3$ , 150 MHz)  $\delta$  155.0, 154.3, 149.9, 139.8, 118.4, 60.2, 45.6, 45.3, 23.2, 10.9, 10.5, 3.4.

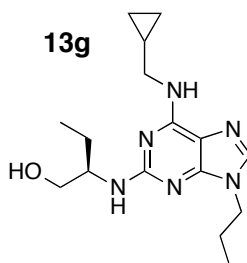

**(R)-2-(6-(Cyclopropylmethylamino)-9-propyl-9H-purin-2-ylamino)butan-1-ol (13g).** A mixture of **15a** (50.0 mg, 0.188 mmol) and (*R*)-(-)-2-amino-1-butanol (89.2 mg, 0.941 mmol) was heated in a pressure tube immersed in an oil bath at 170 °C for 10 h. The reaction mixture was cooled to room temperature, diluted with water, and extracted with EtOAc (3x). The combined organic phases were washed with warm water (50-55 °C,

2x), dried (MgSO<sub>4</sub>), concentrated, and dried under high-vacuum to yield a yellow solid. Upon the addition of Et<sub>2</sub>O to the solid, an off-white solid was precipitated. The solid was rinsed (Et<sub>2</sub>O, 3x) by pipetting out the supernatant and dried under high-vacuum to yield **13g** (37.4 mg, 0.117 mmol, 62%) as an off-white solid: Mp 146-149 °C; IR (ATR, neat) 3319, 2966, 2847, 1611, 1489 cm<sup>-1</sup>; <sup>1</sup>H NMR (CDCl<sub>3</sub>, 600 MHz) δ 7.42 (s, 1 H), 5.81 (bs, 1 H), 5.51 (bs, 1 H), 4.96-4.88 (m, 1 H), 3.94 (t, 2 H, *J* = 7.2 Hz), 3.91-3.85 (m, 1 H), 3.82 (d, 1 H, *J* = 10.2 Hz), 3.63 (dd, 1 H, *J* = 10.2, 8.4 Hz), 3.38 (bs, 2 H), 1.84 (sext, 2 H, *J* = 7.2 Hz), 1.68-1.49 (m, 2 H), 1.15-1.05 (m, 1 H), 1.01 (t, 3 H, *J* = 7.2 Hz), 0.92 (t, 3 H, *J* = 7.2 Hz), 0.55-0.50 (m, 2 H), 0.28-0.23 (m, 2 H); <sup>13</sup>C NMR (CDCl<sub>3</sub>, 150 MHz) δ 160.2, 154.8, 150.5, 136.9, 114.2, 68.4, 56.3, 45.4, 45.0, 25.0, 23.1, 11.1, 10.9, 10.8, 3.4; HRMS (EI) *m/z* calcd for C<sub>16</sub>H<sub>26</sub>N<sub>6</sub>O 318.2168, found 318.2168.

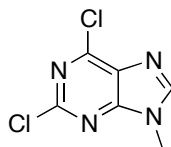

**15b**

**2,6-Dichloro-9-methyl-9H-purine (15b).**<sup>3</sup> To a solution of 2,6-dichloro-9H-purine (0.120 g, 0.635 mmol) in anhydrous DMF (1.0 mL) was added K<sub>2</sub>CO<sub>3</sub> (0.270 g, 1.95 mmol) followed by iodomethane (0.20 mL, 3.21 mmol) at 0 °C. The reaction mixture was stirred for 5 h at 0 °C, quenched with water and extracted with EtOAc. The organic layers were combined, washed with brine, dried (MgSO<sub>4</sub>), concentrated, and purified by chromatography on SiO<sub>2</sub> (hexanes, 100%, to EtOAc, 100%) to yield **15b** (83.0 mg, 0.409 mmol, 64% yield) as a colorless solid: IR (ATR, neat) 3067, 1554, 1360, 1333, 1223, 1147 cm<sup>-1</sup>; <sup>1</sup>H NMR (CDCl<sub>3</sub>, 600 MHz) δ 8.09 (s, 1 H), 3.89 (s, 3 H); <sup>13</sup>C NMR (CDCl<sub>3</sub>, 150 MHz) δ 153.3, 152.7, 151.3, 146.4, 130.4, 30.4.

<sup>3</sup> Beaman, A. G.; Robins, R. K., "Direct conversion of chloropurines to fluoropurines." *J. Org. Chem.* **1963**, *28*, 2310-2313.

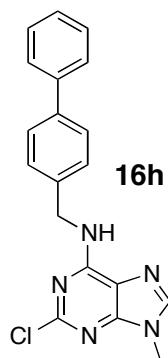

***N*-(Biphenyl-4-ylmethyl)-2-chloro-9-methyl-9*H*-purin-6-amine (16h).**<sup>2</sup> To a solution of **15b** (60.0 mg, 0.296 mmol) in *n*-BuOH (1.0 mL) were added 4-phenylbenzylamine (58.6 mg, 0.310 mmol) and triethylamine (48.6 mg, 0.476 mmol) under an N<sub>2</sub> atmosphere. The reaction mixture was heated under microwave irradiation at 120 °C for 30 min. *n*-BuOH was evaporated, and the residue was dissolved in EtOAc and washed with water. The aqueous phase was further extracted with EtOAc, and the combined organic layers were dried (MgSO<sub>4</sub>) and concentrated to yield a colorless solid. The solid was resuspended (hexanes/Et<sub>2</sub>O, 2:1), filtered, triturated (hexanes/Et<sub>2</sub>O, 2:1), and dried under high-vacuum to yield **16h** (89.0 mg, 0.254 mmol, 86%) as an off-white solid: IR (ATR, neat) 3214, 2387, 1620, 1602, 1482, 1308, 1233 cm<sup>-1</sup>; <sup>1</sup>H NMR (CDCl<sub>3</sub>/CD<sub>3</sub>OD, 9/1, 600 MHz) δ 7.64 (bs, 1 H), 7.49 (d, 4 H, *J* = 7.8 Hz), 7.38 (d, 2 H, *J* = 7.8 Hz), 7.34 (t, 2 H, *J* = 7.8 Hz), 7.25 (t, 1 H, *J* = 7.8 Hz), 4.74 (bs, 2 H), 3.77 (s, 3 H); <sup>13</sup>C NMR (CDCl<sub>3</sub>/CD<sub>3</sub>OD, 9/1, 150 MHz) δ 154.7, 154.5, 150.1, 140.5, 140.4, 140.3, 136.7, 128.6, 128.2, 127.1, 126.8, 117.8, 44.1, 29.8.

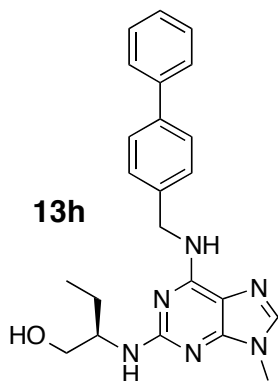

***(R)*-2-(6-(Biphenyl-4-ylmethylamino)-9-methyl-9*H*-purin-2-ylamino)butan-1-ol (13h).** A mixture of **16h** (50.0 mg, 0.143 mmol) and *(R)*-(-)-2-amino-1-butanol (68.4 mg, 0.721 mmol) was heated in a microwave vial immersed in an oil bath at 170 °C for 15 h. The

reaction mixture was cooled to room temperature, diluted with water, and extracted with EtOAc (3x). The combined organic phases were washed with warm water (50-55 °C, 2x) dried (MgSO<sub>4</sub>), concentrated, and dried under high-vacuum to yield an oily, yellow-green residue. Addition of Et<sub>2</sub>O and hexanes resulted in the precipitation of a light green solid. The solid was rinsed (Et<sub>2</sub>O, 3x) by pipetting out the supernatant and dried under high-vacuum at 40 °C to yield impure product (90% purity). The solid and filtrate were combined, preadsorbed onto SiO<sub>2</sub> and purified by chromatography on SiO<sub>2</sub> (hexanes/EtOAc, 1:1, to EtOAc/Et<sub>3</sub>N, 99:1, to EtOAc/MeOH/Et<sub>3</sub>N, 98:10:1) to yield **13h** (35.7 mg, 0.0887 mmol, 62%) as a light green solid: Mp 133-136 °C; IR (ATR, neat) 3290, 2927, 1600, 1487 cm<sup>-1</sup>; <sup>1</sup>H NMR (CDCl<sub>3</sub>, 600 MHz) δ 7.59 (d, 2 H, *J* = 7.2 Hz), 7.56 (d, 2 H, *J* = 7.8 Hz), 7.47-7.43 (m, 4 H), 7.41 (s, 1 H), 7.35 (t, 1 H, *J* = 7.2 Hz), 6.00 (bs, 1 H), 4.97-4.87 (m, 1 H), 4.83 (bs, 2 H), 4.00- 3.90 (m, 1 H), 3.83 (dd, 1 H, *J* = 10.8, 2.4 Hz), 3.66 (s, 3 H), 3.64 (dd, 1 H, *J* = 10.8, 7.8 Hz), 1.68-1.52 (m, 2 H), 1.03 (t, 3 H, *J* = 7.2 Hz); <sup>13</sup>C NMR (CDCl<sub>3</sub>, 150 MHz) δ 160.3, 154.8, 151.0, 140.8, 140.2, 137.8, 137.6, 128.7, 128.1, 127.3, 127.0, 114.2, 68.2, 56.2, 44.1, 29.4, 25.0, 10.9; HRMS (EI) *m/z* calcd for C<sub>23</sub>H<sub>26</sub>N<sub>6</sub>O 402.2168, found 402.2178.

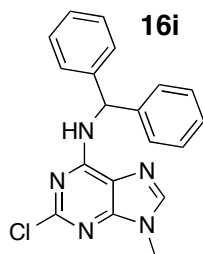

**2-Chloro-*N*-(2,2-diphenylethyl)-9-methyl-9*H*-purin-6-amine (16i)**. To a solution of **15b** (68.0 mg, 0.335 mmol) in *n*-BuOH (1.0 mL) was added aminodiphenylmethane (66.2 mg, 0.350 mmol) and triethylamine (55.1 mg, 0.539 mmol) under an N<sub>2</sub> atmosphere. The reaction mixture was heated under microwave irradiation at 120 °C for 30 min. *n*-BuOH was evaporated, and the residue was dissolved in EtOAc and washed with water. The aqueous phase was further extracted with EtOAc, and the combined organic extracts were dried (MgSO<sub>4</sub>) and concentrated to yield a colorless solid. The solid was resuspended (hexanes/Et<sub>2</sub>O, 2:1), filtered, triturated (hexanes/Et<sub>2</sub>O, 2:1), and dried under high-vacuum to yield **16i** (83.0 mg, 0.237 mmol, 71%) as an off-white, crude solid that was used without further purification: Characteristic signals: <sup>1</sup>H NMR (CDCl<sub>3</sub>, 600



MHz)  $\delta$  7.40-7.20 (m, 12 H), 6.75 (bs, 1 H), 3.69 (s, 3 H);  $^{13}\text{C}$  NMR ( $\text{CDCl}_3$ , 150 MHz)  $\delta$  154.5, 154.2, 150.7, 141.3, 140.9, 128.5, 127.6, 127.4, 118.4, 57.3, 29.9.

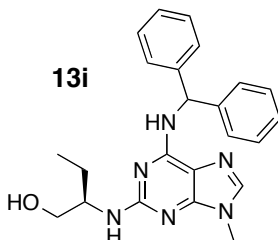

**(*R*)-2-(6-(2,2-Diphenylethylamino)-9-methyl-9*H*-purin-2-ylamino)butan-1-ol (13i).** A mixture of **16i** (50.0 mg, 0.143 mmol) and (*R*)-(-)-2-amino-1-butanol (68.4 mg, 0.721 mmol) was heated in a microwave vial immersed in an oil bath at 170 °C for 15 h. The reaction mixture was cooled to room temperature, diluted with water, and extracted with EtOAc (3x). The combined organic phases were washed with warm water (50-55 °C, 2x) dried ( $\text{MgSO}_4$ ), concentrated, and dried under high-vacuum at 50 °C (oil bath) for 2 h to yield an oily green residue. The crude residue was adsorbed onto  $\text{SiO}_2$  and purified by chromatography on  $\text{SiO}_2$  (hexanes/EtOAc, 1:1, to EtOAc/ $\text{Et}_2\text{N}$ , 99:1, to EtOAc/MeOH/ $\text{Et}_3\text{N}$ , 94:5:1) to yield **13i** (36.5 mg, 0.0907 mmol, 63%) as an off-white solid: Mp 130-134 °C; IR (ATR, neat) 3301 (br), 2932, 1597, 1474  $\text{cm}^{-1}$ ;  $^1\text{H}$  NMR ( $\text{CDCl}_3$ , 600 MHz)  $\delta$  7.40-7.20 (m, 10 H), 6.60-6.40 (m, 2 H), 4.83 (d, 1 H,  $J = 6.0$  Hz), 3.80-3.75 (m, 1 H), 3.70-3.65 (m, 1 H), 3.59 (s, 3 H), 3.60-3.50 (m, 1 H), 1.60-1.40 (m, 2 H), 0.94 (t, 3 H,  $J = 7.2$  Hz);  $^{13}\text{C}$  NMR ( $\text{CDCl}_3$ , 150 MHz)  $\delta$  160.1, 153.9, 151.2, 142.1, 137.6, 128.51, 128.48, 127.57, 127.55, 127.3, 127.2, 114.1, 67.5, 58.0, 55.8, 29.3, 24.8, 10.8; HRMS (EI)  $m/z$  calcd for  $\text{C}_{23}\text{H}_{26}\text{N}_6\text{O}$  402.2168, found 402.2170.

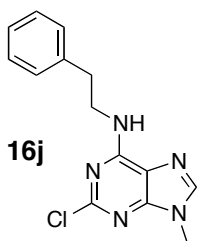

**2-Chloro-9-methyl-*N*-phenethyl-9*H*-purin-6-amine (16j).** To a solution of **15b** (60.0 mg, 0.296 mmol) in *n*-BuOH (1.0 mL) was added phenethylamine (38.0 mg, 0.312 mmol) and triethylamine (47.9 mg, 0.474 mmol) under an  $\text{N}_2$  atmosphere. The reaction mixture was heated under microwave irradiation at 120 °C for 30 min. *n*-BuOH was evaporated,

and the residue was dissolved in EtOAc and washed with water. The aqueous phase was further extracted with EtOAc, and the combined organic extracts were dried (MgSO<sub>4</sub>) and concentrated to yield a colorless solid. The solid was resuspended (hexanes/Et<sub>2</sub>O, 3:1), filtered, triturated (hexanes/Et<sub>2</sub>O, 3:1), and dried under high-vacuum to yield **16j** (71.0 mg, 0.247 mmol, 83%) as an off-white amorphous solid: IR (ATR, neat) 3233, 1615, 1578, 1299, 1231 cm<sup>-1</sup>; <sup>1</sup>H NMR (CDCl<sub>3</sub> 600 MHz) δ 7.49 (bs, 1 H), 7.27 (d, 2 H, *J* = 7.2 Hz), 7.24-7.18 (m, 3 H), 6.41 (bs, 1 H), 3.93-3.83 (m, 2 H), 3.77 (s, 3 H), 2.97 (t, 2 H, *J* = 7.2 Hz); <sup>13</sup>C NMR (CDCl<sub>3</sub>, 150 MHz) δ 155.1, 154.6, 150.3, 140.5, 138.7, 128.8, 128.5, 126.4, 118.5, 41.9, 35.5, 29.9.

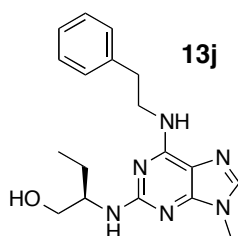

**(*R*)-2-(9-Methyl-6-(phenethylamino)-9H-purin-2-ylamino)butan-1-ol (13j)**. A mixture of **16j** (50.0 mg, 0.174 mmol) and (*R*)-(-)-2-amino-1-butanol (83.6 mg, 0.882 mmol) was heated in a microwave vial immersed in an oil bath at 170 °C for 15 h. The reaction mixture was cooled to room temperature, diluted with water, and extracted with EtOAc (3x). The combined organic phases were washed with warm water (50-55 °C, 2x), dried (MgSO<sub>4</sub>), concentrated, and dried under high-vacuum to yield an oily yellow residue. Addition of Et<sub>2</sub>O and a few drops of hexanes to the solid resulted in the precipitation of an off-white solid. The solid was rinsed (Et<sub>2</sub>O, 3x) by pipetting out the supernatant and dried under high-vacuum at 40 °C. The solid and the filtrate were combined, adsorbed onto SiO<sub>2</sub>, and purified by chromatography on SiO<sub>2</sub> (hexanes/EtOAc, 1:1, to EtOAc/Et<sub>3</sub>N, 99:1, to EtOAc/MeOH/Et<sub>3</sub>N, 94:5:1) to yield **13j** (37.8 mg, 0.111 mmol, 64%) as a light green solid: Mp 108-110 °C; IR (ATR, neat) 3922 (br), 2931, 1598, 1488 cm<sup>-1</sup>; <sup>1</sup>H NMR (CDCl<sub>3</sub>, 600 MHz) δ 7.39 (s, 1 H), 7.32-7.24 (m, 4 H), 7.22 (t, 1 H, *J* = 7.2 Hz), 5.65 (bs, 1 H), 5.13 (bs, 1 H), 4.93-4.85 (m, 1 H), 3.97-3.90 (m, 1 H), 3.90-3.75 (m, 3 H), 3.67-3.63 (m, 1 H), 3.63 (s, 3 H), 2.96 (t, 2 H, *J* = 7.2 Hz), 1.70-1.55 (m, 2 H), 1.04 (t, 3 H, *J* = 7.2 Hz); <sup>13</sup>C NMR (CDCl<sub>3</sub>, 150 MHz) δ 160.3, 154.9, 150.9, 139.0, 137.5, 128.8, 128.6, 126.4, 114.2, 68.3, 56.2, 41.7, 35.9, 29.3, 25.0, 10.9; HRMS (EI) *m/z* calcd for C<sub>18</sub>H<sub>24</sub>N<sub>6</sub>O 340.2012, found 340.2014.

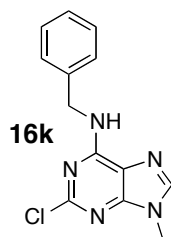

***N*-Benzyl-2-chloro-9-methyl-9*H*-purin-6-amine (16k).**<sup>4</sup> To a solution of **15b** (71.0 mg, 0.350 mmol) in *n*-BuOH (1.0 mL) were added benzylamine (40.50 mg, 0.370 mmol) and triethylamine (56.6 mmol, 0.560 mmol) under an N<sub>2</sub> atmosphere. The reaction mixture was heated under microwave irradiation at 120 °C for 30 min. *n*-BuOH was evaporated, and the residue was dissolved in EtOAc and washed with water. The aqueous phase was further extracted with EtOAc, and the combined organic extracts were dried (MgSO<sub>4</sub>) and concentrated to yield a colorless solid. The solid was resuspended (hexanes/Et<sub>2</sub>O, 3:1), filtered, triturated (hexanes/Et<sub>2</sub>O, 3:1), and dried under high-vacuum to yield **16k** (65.5 mg, 0.239 mmol, 68%) as a colorless solid: IR (ATR, neat) 2385, 1596, 1572, 1325, 1232 cm<sup>-1</sup>; <sup>1</sup>H NMR (CDCl<sub>3</sub>/CD<sub>3</sub>OD, 9/1, 600 MHz) δ 7.72 (bs, 1 H), 7.40 (d, 2 H, *J* = 7.2 Hz), 7.35 (t, 2 H, *J* = 7.2 Hz), 7.29 (t, 1 H, *J* = 7.2 Hz), 4.79 (bs, 2 H), 3.79 (s, 3 H); <sup>13</sup>C NMR (CDCl<sub>3</sub>/CD<sub>3</sub>OD, 9/1, 150 MHz) δ 154.7, 154.5, 150.1, 140.5, 137.6, 128.4, 127.7, 127.4, 117.8, 44.4, 29.8.

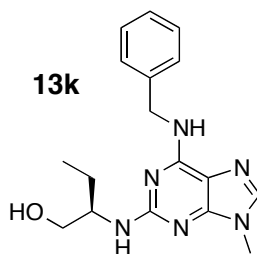

**(*R*)-2-(6-(Benzylamino)-9-methyl-9*H*-purin-2-ylamino)butan-1-ol (13k).**<sup>5</sup> A mixture of **16k** (49.0 mg, 0.179 mmol) and (*R*)-(-)-2-amino-1-butanol (85.5 mg, 0.902 mmol) was heated in a microwave vial immersed in an oil bath at 170 °C for 11 h. The reaction mixture was cooled to room temperature, diluted with water, and extracted with EtOAc

<sup>4</sup> Havlicek, L.; Hanus, J.; Vesely, J.; Leclerc, S.; Meijer, L.; Shaw, G.; Strnad, M., "Cytokinin-derived cyclin-dependent kinase inhibitors: Synthesis and cdc2 inhibitory activity of olomoucine and related compounds." *J. Med. Chem.* **1997**, *40*, 408-412.

<sup>5</sup> Otyepka, M.; Krystof, V.; Havlicek, L.; Siglerova, V.; Strnad, M.; Koca, J., "Docking-based development of purine-like inhibitors of cyclin-dependent kinase-2." *J. Med. Chem.* **2000**, *43*, 2506-2513.

(3x). The combined organic phases were washed with warm water (50-55 °C, 2x), dried (MgSO<sub>4</sub>), concentrated, and dried under high-vacuum at 50 °C (oil bath) for 2 h to yield a yellow solid. The addition of Et<sub>2</sub>O to the solid resulted in the precipitation of an off-white solid. The solid was rinsed (Et<sub>2</sub>O, 3x) by pipetting out the supernatant and dried under high-vacuum overnight at 40 °C to yield an off-white solid. The crude mixture was purified by chromatography on SiO<sub>2</sub> (hexanes/EtOAc, 1:1, to EtOAc/MeOH/Et<sub>3</sub>N, 94:5:1, to EtOAc/MeOH/Et<sub>3</sub>N, 85:14:1) to yield **13k** (35.5 mg, 0.109 mmol, 61%) as a light yellow solid: Mp 118-120 °C; IR (ATR, neat) 3261 (br), 2958, 1610, 1493 cm<sup>-1</sup>; <sup>1</sup>H NMR (CDCl<sub>3</sub>, 600 MHz) δ 7.40-7.25 (m, 6 H), 6.20 (bs, 1 H), 5.00-4.92 (m, 1 H), 4.74 (bs, 2 H), 3.95-3.90 (m, 1 H), 3.81 (dd, 1 H, *J* = 10.8, 2.4 Hz), 3.62 (s, 3 H), 3.67-3.58 (m, 1 H), 1.67-1.52 (m, 2 H), 1.01 (t, 3 H, *J* = 7.2 Hz); <sup>13</sup>C NMR (CDCl<sub>3</sub>, 150 MHz) δ 160.3, 154.8, 151.0, 138.7, 137.5, 128.5, 127.6, 127.2, 114.1, 67.9, 56.0, 44.3, 29.3, 24.9, 10.9; HRMS (EI) *m/z* calcd for C<sub>17</sub>H<sub>22</sub>N<sub>6</sub>O 326.1855, found 326.1843.

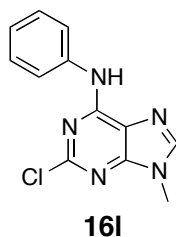

**2-Chloro-9-methyl-N-phenyl-9H-purin-6-amine (16I).**<sup>6</sup> To a solution of **15b** (72.0 mg, 0.355 mmol) in *n*-BuOH (1.0 mL) were added aniline (34.0 mg, 0.365 mmol) and triethylamine (57.4 mg, 0.567 mmol) under an N<sub>2</sub> atmosphere. The reaction mixture was heated under microwave irradiation at 120° C for 30 min. *n*-BuOH was evaporated, and the residue was dissolved in EtOAc and washed with water. The aqueous phase was further extracted with EtOAc, and the combined organic extracts were dried (MgSO<sub>4</sub>) and concentrated to yield a colorless solid. The solid was resuspended (hexanes/Et<sub>2</sub>O, 3:1), filtered, triturated (hexanes/Et<sub>2</sub>O, 3:1), and dried under high-vacuum to yield **16I** (59.7 mg, 0.230 mmol, 65%) as a colorless amorphous solid: IR (ATR, neat) 3286, 1620, 1574, 1437, 1308, 1236 cm<sup>-1</sup>; <sup>1</sup>H NMR (CDCl<sub>3</sub>, 600 MHz) δ 7.85 (bs, 1 H), 7.80-7.70 (m, 3 H), 7.45-7.35 (m, 2 H), 7.20-7.10 (m, 1 H), 3.84 (s, 3 H); <sup>13</sup>C NMR (CDCl<sub>3</sub>, 150 MHz) δ 154.2, 152.3, 151.0, 141.4, 137.9, 129.1, 124.0, 120.2, 119.1, 30.1.

<sup>6</sup> Thompson, R. D.; Secunda, S.; Daly, J. W.; Olsson, R. A., "N<sup>6</sup>,9-disubstituted adenines: Potent, selective antagonists at the A1 adenosine receptor." *J. Med. Chem.* **1991**, *34*, 2877-2882.

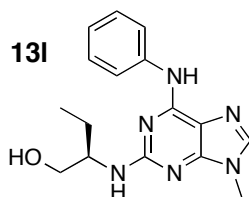

**(R)-2-(9-Methyl-6-(phenylamino)-9H-purin-2-ylamino)butan-1-ol (13I).** A mixture of **16I** (46.0 mg, 0.177 mmol) and (*R*)-(-)-2-amino-1-butanol (85.5 mg, 0.902 mmol) was heated in a microwave vial immersed in an oil bath at 170 °C for 11 h. The reaction mixture was cooled to room temperature, diluted with water, and extracted with EtOAc (3x). The combined organic phases were washed with warm water (50-55 °C, 2x) dried (MgSO<sub>4</sub>), concentrated, and dried under high-vacuum to yield a light green solid. The solid was preadsorbed on SiO<sub>2</sub> and purified by chromatography on SiO<sub>2</sub> (hexanes/EtOAc, 1:1, to EtOAc/Et<sub>3</sub>N, 99:1, to EtOAc/MeOH/Et<sub>3</sub>N, 90:9:1) to yield **13I** (29.8 mg, 0.0954 mmol, 54%) as an off-white, slightly light green solid: Mp 202-206 °C; IR (ATR, neat) 3222, 3133 (br), 2930, 1579, 1498, 1442 cm<sup>-1</sup>; <sup>1</sup>H NMR (CDCl<sub>3</sub>/CD<sub>3</sub>OD, 9/1, 600 MHz) δ 7.66 (dd, 2 H, *J* = 7.2, 1.2 Hz), 7.43 (s, 1 H), 7.25 (t, 2 H, *J* = 7.2 Hz), 6.97 (td, 1 H, *J* = 7.2, 1.2 Hz), 3.90 (s, 3 H), 3.92-3.85 (m, 1 H), 3.67 (dd, 1 H, *J* = 10.8, 3.6 Hz), 3.57-3.53 (m, 1 H), 1.65-1.50 (m, 2 H), 0.92 (t, 3 H, *J* = 7.2 Hz); <sup>13</sup>C NMR (CDCl<sub>3</sub>/CD<sub>3</sub>OD, 9/1, 150 MHz) δ 159.6, 152.1, 151.1, 138.9, 137.79, 137.78, 128.6, 122.9, 119.9, 113.5, 65.2, 55.0, 29.1, 24.3, 10.4; HRMS (EI) *m/z* calcd for C<sub>16</sub>H<sub>20</sub>N<sub>6</sub>O 312.1699, found 312.1693.

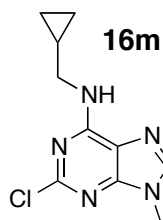

**2-Chloro-N-(cyclopropylmethyl)-9-methyl-9H-purin-6-amine (16m).** To a solution of **15b** (70.0 mg, 0.345 mmol) in *n*-BuOH (1.0 mL) were added aminomethylcyclopropane (30.0 mg, 0.4092 mmol) and triethylamine (55.9 mg, 0.552 mmol) under an N<sub>2</sub> atmosphere. The reaction mixture was heated under microwave irradiation at 120 °C for 30 min. *n*-BuOH was evaporated, and the residue was dissolved in EtOAc and washed with water. The aqueous phase was further extracted with EtOAc, and the combined

organic extracts were dried (MgSO<sub>4</sub>), concentrated, and dried under high-vacuum overnight to yield **16m** (77.9 mg, 0.328 mmol, 95% yield) as a colorless solid: IR (ATR, neat) 3260, 1618, 1581, 1301, 1234 cm<sup>-1</sup>; <sup>1</sup>H NMR (CDCl<sub>3</sub>, 600 MHz) δ 7.68 (s, 1 H), 6.07 (bs, 1 H), 3.78 (s, 3 H), 3.50-3.40 (m, 2 H), 1.13-1.07 (m, 1 H), 0.55 (dd, 2 H; *J* = 12.6, 4.8 Hz), 0.30 (dd, 2 H, *J* = 9.6, 4.8 Hz); <sup>13</sup>C NMR (CDCl<sub>3</sub>, 150 MHz) δ 155.1, 154.6, 150.3, 140.5, 118.5, 45.8, 30.0, 10.5, 3.5.

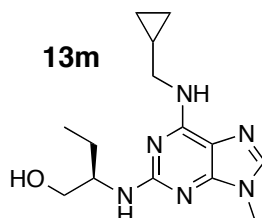

**(*R*)-2-(6-(Cyclopropylmethylamino)-9-methyl-9*H*-purin-2-ylamino)butan-1-ol (**13m**).**

A mixture of **16m** (50.0 mg, 0.210 mmol) and (*R*)-(-)-2-amino-1-butanol (95.0 mg, 1.00 mmol) was heated in a microwave vial immersed in an oil bath at 170 °C for 11 h. The reaction was cooled to room temperature, diluted with water, and extracted with EtOAc (3x). The combined organic phases were washed with warm water (50-55 °C, 2x), dried (MgSO<sub>4</sub>), concentrated, and dried under high-vacuum to yield a green solid. Addition of Et<sub>2</sub>O to the solid resulted in the precipitation of an off-white solid. The solid was rinsed (Et<sub>2</sub>O, 3x) by pipetting out the supernatant and dried under high-vacuum to yield a light green solid. The crude residue was purified by chromatography on SiO<sub>2</sub> (hexanes/EtOAc, 1:1, to EtOAc/MeOH/Et<sub>3</sub>N, 94:5:1, to EtOAc/MeOH/Et<sub>3</sub>N, 84:15:1) to yield **13m** (35.8 mg, 0.123 mmol, 59%) as a crystalline green solid: Mp 147-150 °C; IR (ATR, neat) 3328, 3078, 2849, 1610, 1490 cm<sup>-1</sup>; <sup>1</sup>H NMR (CDCl<sub>3</sub>, 600 MHz) δ 7.40 (s, 1 H), 5.83 (bs, 1 H), 5.37 (bs, 1 H), 5.00-4.87 (m, 1 H), 3.95-3.88 (m, 1 H), 3.82 (d, 1 H, *J* = 10.8 Hz), 3.67-3.58 (m, 1 H), 3.62 (s, 3 H), 3.39 (bs, 2 H), 1.68-1.50 (m, 2 H), 1.13-1.03 (m, 1 H), 1.02 (t, 3 H, *J* = 7.2 Hz), 0.58-0.48 (m, 2 H), 0.31-0.21 (m, 2 H); <sup>13</sup>C NMR (CDCl<sub>3</sub>, 150 MHz) δ 160.3, 154.8, 150.8, 137.3, 114.0, 68.1, 56.1, 45.4, 29.3, 25.0, 10.9, 10.8, 3.4; HRMS (EI) *m/z* calcd for C<sub>14</sub>H<sub>22</sub>N<sub>6</sub>O 290.1855, found 290.1850.

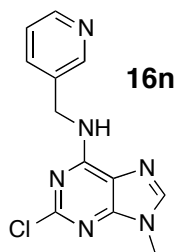

**2-Chloro-9-methyl-*N*-(pyridin-3-ylmethyl)-9*H*-purin-6-amine (16n).**<sup>7</sup> To a solution of **15b** (72.0 mg, 0.355 mmol) in *n*-BuOH (1.0 mL) was added 3-(aminomethyl)pyridine (39.7 mg, 0.367 mmol) and triethylamine (57.5 mg, 0.568 mmol) under an N<sub>2</sub> atmosphere. The reaction mixture was heated under microwave irradiation at 120 °C for 30 min. *n*-BuOH was evaporated, and the residue was dissolved in EtOAc and washed with water. The aqueous phase was further extracted with EtOAc, and the combined organic extracts were dried (MgSO<sub>4</sub>) and concentrated to yield a colorless solid. The solid was resuspended (hexanes/Et<sub>2</sub>O, 1:1), filtered, triturated (hexanes/Et<sub>2</sub>O, 1:1), and dried under high-vacuum to yield **16n** (76.0 mg, 0.277 mmol, 78%) contaminated with a small amount (~10%) of EtOAc and Et<sub>2</sub>O as a fine yellow amorphous solid that was used for the next reaction without further purification: IR (ATR, neat) 3076, 2401, 1603, 1579, 1313, 1232 cm<sup>-1</sup>; <sup>1</sup>H NMR (CDCl<sub>3</sub>/CD<sub>3</sub>OD, 9/1, 600 MHz) δ 8.50 (bs, 1 H), 8.35 (bs, 1 H), 7.71 (d, 1 H, *J* = 7.8 Hz), 7.65 (s, 1 H), 7.25-7.20 (m, 1 H), 4.70 (bs, 2 H), 3.68 (s, 3 H); <sup>13</sup>C NMR (CDCl<sub>3</sub>/CD<sub>3</sub>OD, 9/1, 150 MHz) δ 154.6, 154.3, 148.6, 147.9, 140.7, 136.2, 134.1, 123.6, 117.8, 41.6, 29.8.

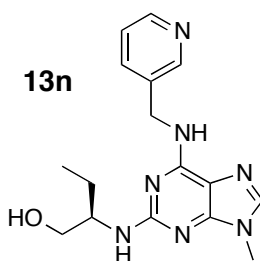

**(*R*)-2-(9-Methyl-6-(pyridin-3-ylmethylamino)-9*H*-purin-2-ylamino)butan-1-ol (13n).** A mixture of **16n** (70.0 mg, 0.255 mmol) and (*R*)-(-)-2-amino-1-butanol (124 mg, 1.30 mmol) was heated in a microwave vial immersed in an oil bath at 170 °C for 8.5 h. The reaction mixture was cooled to room temperature, diluted with water, and extracted with

<sup>7</sup> Schow, S. R.; Mackman, R. L.; Blum, C. L.; Brooks, E.; Horsma, A. G.; Joly, A.; Kerwar, S. S.; Lee, G.; Shiffman, D.; Nelson, M. G.; Wang, X.; Wick, M. M.; Zhang, X.; Lum, R. T., "Synthesis and activity of 2,6,9-trisubstituted purines." *Bioorg. Med. Chem. Lett.* **1997**, *7*, 2697-2702.

EtOAc (3x). The combined organic phases were washed with warmed water (50-55 °C, 2x) dried (MgSO<sub>4</sub>), concentrated, and dried under high-vacuum to yield an oily, green solid. Addition of Et<sub>2</sub>O and a few drops of hexanes to the solid resulted in the precipitation of a dark green solid. The solid was carefully crushed with a glass rod, rinsed (Et<sub>2</sub>O, 3x) by pipetting out the supernatant, and dried under high-vacuum overnight to yield a light green solid. The crude residue was purified by chromatography on SiO<sub>2</sub> (hexanes/EtOAc, 1:1, to EtOAc/MeOH/Et<sub>3</sub>N, 78:20:2) to yield **16n** (32.6 mg, 0.0936 mmol, 37%) as a green-gray solid: Mp 136-139 °C; IR (ATR, neat) 3256 (br), 2930, 1603, 1551, 1477 cm<sup>-1</sup>; <sup>1</sup>H NMR (CDCl<sub>3</sub>, 600 MHz) δ 8.59 (d, 1 H, *J* = 1.8 Hz), 8.47 (dd, 1 H, *J* = 4.8, 1.8 Hz), 7.65 (d, 1 H, *J* = 7.8 Hz), 7.36 (s, 1 H), 7.20 (dd, 1 H, *J* = 7.8, 4.8 Hz), 6.58 (bs, 1 H), 5.08-5.00 (m, 1 H), 4.72 (bs, 2 H), 3.94-3.88 (m, 1 H), 3.76 (dd, 1 H, *J* = 10.8, 2.4 Hz), 3.61 (s, 3 H), 3.59 (dd, 1 H, *J* = 10.8, 7.2 Hz), 1.66-1.59 (m, 1 H), 1.55-1.49 (m, 1 H), 0.98 (t, 3 H, *J* = 7.2 Hz); <sup>13</sup>C NMR (CDCl<sub>3</sub>, 150 MHz) δ 160.0, 154.5, 151.1, 149.2, 148.5, 137.7, 135.3, 134.5, 123.4, 113.9, 67.3, 55.9, 41.8, 29.4, 24.9, 10.8; IR (ATR, neat) 3256 (br), 2930, 1603, 1551, 1477 cm<sup>-1</sup>; HRMS (EI) *m/z* calcd for C<sub>16</sub>H<sub>21</sub>N<sub>7</sub>O 327.1808, found 327.1806.

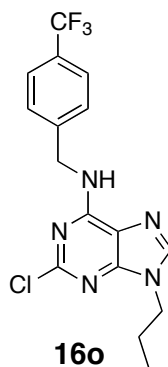

**2-Chloro-9-propyl-N-(4-(trifluoromethyl)benzyl)-9H-purin-6-amine (16o).** To a solution of **15a**<sup>8</sup> (80.0 mg, 0.346 mmol) in *n*-BuOH (1.0 mL) were added 4-(trifluoromethyl)benzylamine (63.9 mg, 0.358 mmol) and triethylamine (55.9 mg, 0.552 mmol) under an N<sub>2</sub> atmosphere. The reaction mixture was heated under microwave irradiation at 120 °C for 30 min. *n*-BuOH was evaporated, and the residue was dissolved

<sup>8</sup> Dhainaut, A.; Regnier, G.; Tizot, A.; Pierre, A.; Leonce, S.; Guilbaud, N.; Kraus-Berthier, L.; Atassi, G., "New purines and purine analogs as modulators of multidrug resistance." *J. Med. Chem.* **1996**, *39*, 4099-4108.



in EtOAc and washed with water. The aqueous phase was further extracted with EtOAc, and the combined organic extracts were dried (MgSO<sub>4</sub>), and concentrated to yield a colorless solid. The solid was resuspended (hexanes/Et<sub>2</sub>O, 3:1), filtered, triturated (hexanes/Et<sub>2</sub>O, 3:1), and dried under high-vacuum to yield **16o** (78.0 mg, 0.211 mmol, 61%) as a colorless amorphous solid: IR (ATR, neat) 3261, 1630, 1580, 1325, 1308, 1253 cm<sup>-1</sup>; <sup>1</sup>H NMR (CDCl<sub>3</sub>, 600 MHz) δ 7.58 (d, 2 H, *J* = 7.8 Hz), 7.52-7.45 (m, 3 H), 6.96 (bs, 1 H), 4.90 (bs, 2 H), 4.09 (t, 2 H, *J* = 7.2 Hz), 1.87 (sext, 2 H, *J* = 7.2 Hz), 0.94 (t, 3 H, *J* = 7.2 Hz); <sup>13</sup>C NMR (CDCl<sub>3</sub>, 150 MHz) δ 155.0, 154.4, 150.4, 142.3, 140.3, 129.8 (q, *J* = 33 Hz), 128.0, 125.5 (q, *J* = 3 Hz), 124.0 (q, *J* = 270 Hz), 118.6, 45.5, 43.9, 23.3, 11.0.

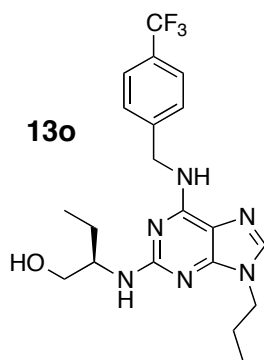

**(*R*)-2-(9-Propyl-6-(4-(trifluoromethyl)benzylamino)-9*H*-purin-2-ylamino)butan-1-ol (13o).** A mixture of **16o** (50.0 mg, 0.135 mmol) and (*R*)-(-)-2-amino-1-butanol (71.3 mg, 0.751 mmol) was heated in a microwave vial immersed in an oil bath at 170 °C for 12 h. The reaction mixture was cooled to room temperature, diluted with water, and extracted with EtOAc (3x). The combined organic phases were washed with warm water (50-55 °C, 2x), dried (MgSO<sub>4</sub>), concentrated, and dried under high-vacuum to yield a yellow solid. Addition of Et<sub>2</sub>O/hexanes (1:1) to the solid resulted in the precipitation of a light green solid. The solid was rinsed (Et<sub>2</sub>O/hexanes, 1:1) by pipetting out the supernatant and dried under high-vacuum overnight at 40 °C to yield **13o** (38.3 mg, 0.0907 mmol, 67%) as a light green crystalline solid: Mp 124-127 °C; IR (ATR, neat) 3266, 2962, 1600, 1545, 1326, 1104 cm<sup>-1</sup>; <sup>1</sup>H NMR (CDCl<sub>3</sub>, 600 MHz) δ 7.56 (d, 2 H, *J* = 8.4 Hz), 7.46 (d, 2 H, *J* = 7.8 Hz), 7.38 (s, 1 H), 6.40 (bs, 1 H), 4.91 (d, 1 H, *J* = 6.0 Hz), 4.95-4.75 (m, 2 H), 3.95 (t, 2 H, *J* = 7.2 Hz), 3.89-3.82 (m, 1 H), 3.80 (dd, 1 H, *J* = 10.8, 1.8 Hz), 3.61 (dd, 1 H, *J* = 10.8, 7.8 Hz), 1.85 (sextet, 2 H, *J* = 7.2 Hz), 1.64-1.49 (m, 2 H), 0.99 (t, 3 H, *J* =

7.2 Hz), 0.94 (t, 3 H,  $J = 7.2$  Hz);  $^{13}\text{C}$  NMR ( $\text{CDCl}_3$ , 150 MHz)  $\delta$  160.1, 154.7, 150.8, 143.2, 137.3, 129.4 (q,  $J = 33$  Hz), 127.7, 125.4 (q,  $J = 3$  Hz), 124.1 (q,  $J = 270$  Hz), 114.3, 68.2, 56.2, 45.1, 43.8, 24.9, 23.2, 11.2, 10.9; HRMS (EI)  $m/z$  calcd for  $\text{C}_{20}\text{H}_{25}\text{F}_3\text{N}_6\text{O}$  422.2042, found 422.2038.

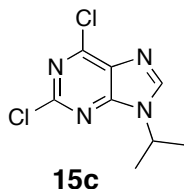

**2,6-Dichloro-9-isopropyl-9H-purine (15c).**<sup>9</sup> To a solution of 2,6-dichloro-9H-purine (0.500 g, 2.65 mmol) in anhydrous DMSO (3.0 mL) cooled to 15 °C was added  $\text{K}_2\text{CO}_3$  (1.10 g, 7.96 mmol) followed by 2-iodopropane (1.35 mL, 13.4 mmol). The mixture was stirred overnight at room temperature, quenched with water and extracted with EtOAc. The organic layers were combined, washed with brine, dried ( $\text{MgSO}_4$ ), concentrated, and purified by chromatography on  $\text{SiO}_2$  (hexanes, 100%, to hexanes/EtOAc, 1:1) to yield **15c** (0.415 g, 1.80 mmol, 68%) as a colorless solid: Mp 149-151 °C; IR (ATR, neat) 1587, 1554, 1356, 1214  $\text{cm}^{-1}$ ;  $^1\text{H}$  NMR ( $\text{CDCl}_3$ , 600 MHz)  $\delta$  8.18 (s, 1 H), 4.92 (hept, 1 H,  $J = 6.6$  Hz), 1.65 (d, 6 H,  $J = 6.6$  Hz);  $^{13}\text{C}$  NMR ( $\text{CDCl}_3$ , 150 MHz)  $\delta$  152.7, 152.6, 151.6, 143.5, 131.0, 48.3, 22.5; HRMS (EI)  $m/z$  calcd for  $\text{C}_8\text{H}_8\text{Cl}_2\text{N}_4$  230.0126, found 230.0120.

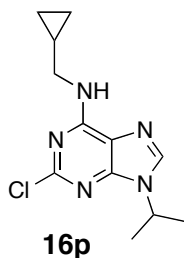

**2-Chloro-N-(cyclopropylmethyl)-9-isopropyl-9H-purin-6-amine (16p).** To a solution of **15c** (100 mg, 0.433 mmol) in *n*-BuOH (1.5 mL) were added cyclopropylmethanamine (36.9 mg, 0.519 mmol) and  $\text{Et}_3\text{N}$  (70.9 mg, 0.692 mmol). The reaction was heated under microwave irradiation at 120 °C for 20 min. *n*-BuOH was evaporated *in vacuo*. The

<sup>9</sup> Oumata, N.; Bettayeb, K.; Ferandin, Y.; Demange, L.; Lopez-Giral, A.; Goddard, M.-L.; Myrianthopoulos, V.; Mikros, E.; Flajolet, M.; Greengard, P.; Meijer, L.; Galons, H., "Roscovitine-derived, dual-specificity inhibitors of cyclin-dependent kinases and casein kinases 1." *J. Med. Chem.* **2008**, *51*, 5229-5242.

residue was diluted with water (5.0 mL), and the mixture was extracted with EtOAc (3 x 7.0 mL). The combined organic extracts were dried (MgSO<sub>4</sub>), filtered, and concentrated to yield a pale yellow solid. The residue was resuspended (hexanes/Et<sub>2</sub>O, 2:1), filtered, and washed (hexanes/Et<sub>2</sub>O, 3:1). The solid was filtered and dried under high-vacuum to yield **16p** (60.3 mg, 0.227 mmol, 52%) as a pale yellow solid: Mp 70.2-72.7 °C; IR (ATR) 3286, 3086, 3068, 3055, 3038, 3030, 1647, 1627, 1592, 1575, 1560, 1446, 1314, 1273, 1204, 1174, 1159, 1150, 1075, 1027, 997, 943, 936, 917, 865, 813, 764, 719, 701, 691 cm<sup>-1</sup>; <sup>1</sup>H NMR (CDCl<sub>3</sub>, 300 MHz) δ 7.80 (s, 1 H), 6.03 (bs, 1 H), 4.88-4.79 (hept, 1 H, *J* = 6.9 Hz), 3.49 (bs, 2 H), 1.58 (d, 6 H, *J* = 6.9 Hz), 1.20-1.10 (m, 1 H), 0.59 (q, 2 H, *J* = 5.7 Hz), 0.32 (q, 2 H, *J* = 4.5 Hz); <sup>13</sup>C NMR (CDCl<sub>3</sub>, 75 MHz) δ 155.2, 137.4, 118.9, 46.9, 45.9, 29.7, 22.8, 10.7, 3.6; EIMS *m/z* 265 (M<sup>+</sup>, 71), 238 (63), 236 (91), 230 (86), 194 (72), 182 (57), 86 (94), 84 (100); HRMS (EI) *m/z* calcd for C<sub>12</sub>H<sub>16</sub>ClN<sub>5</sub> 265.1094, found 265.1096.

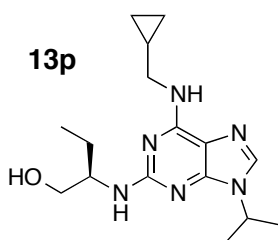

**(*R*)-2-(6-(Cyclopropylmethylamino)-9-isopropyl-9*H*-purin-2-ylamino)butan-1-ol**

**(13p).** A mixture of **16p** (50.0 mg, 0.188 mmol) and (*R*)-(-)-2-amino-1-butanol (124.0 mg, 1.40 mmol) was heated in a microwave vial immersed in an oil bath at 170 °C for 15 h. The reaction mixture was cooled to room temperature, diluted with water (7.0 mL), and extracted with EtOAc (4 x 10.0 mL). The combined organic phases were washed with warm water (50-55 °C, 2 x 5.0 mL), dried (MgSO<sub>4</sub>), concentrated, and dried under high-vacuum overnight to yield a yellow oil. The yellow oil was dissolved in EtOAc and suspended in Et<sub>2</sub>O. Dropwise addition of hexanes (minimal solvent added to achieve a homogeneous supernatant) precipitated an off-white solid. The solid was rinsed (Et<sub>2</sub>O/hexanes, 2:1) by pipetting out the supernatant and dried to obtain crude **13p** (51.0 mg, 0.160 mmol, 85%) as an oil that was used without further purification: IR (ATR) 3286, 3086, 3068, 3055, 3038, 3030, 1647, 1627, 1592, 1575, 1560, 1446, 1314, 1273, 1204, 1174, 1159, 1150, 1075, 1027, 997, 943, 936, 917, 865, 813, 764, 719, 700, 691 cm<sup>-1</sup>; <sup>1</sup>H NMR (CDCl<sub>3</sub>, 300 MHz) δ 7.52 (s, 1 H), 5.85 (bs, 1 H), 4.91 (bs, 1 H), 4.58

(hept, 1 H,  $J = 6.3$  Hz), 3.92-3.80 (m, 2 H), 3.72-3.60 (m, 1 H), 3.60-3.30 (m, 2 H), 1.53 (d, 6 H,  $J = 5.7$  Hz), 1.40-0.90 (m, 4 H), 1.03 (t, 3 H,  $J = 6.3$  Hz), 0.57-0.52 (m, 2 H), 0.28 (bs, 2 H);  $^{13}\text{C}$  NMR ( $\text{CDCl}_3$ , 75 MHz)  $\delta$  160.1, 154.9, 134.4, 119.0, 114.6, 68.7, 56.4, 46.4, 29.7, 25.1, 22.6, 11.0, 3.5; EIMS  $m/z$  318 ( $\text{M}^+$ , 46), 288 (54), 287 (100), 265 (36), 236 (82), 230 (71), 194 (41), 134 (46), 119 (32); HRMS (EI)  $m/z$  calcd for  $\text{C}_{16}\text{H}_{26}\text{N}_6\text{O}$  318.2168, found 318.2164.

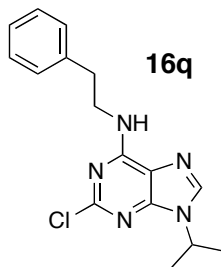

**2-Chloro-9-isopropyl-N-phenethyl-9H-purin-6-amine (16q).** To a solution of **15c** (100 mg, 0.433 mmol) in *n*-BuOH (1.5 mL) were added 2-phenylethylamine (62.9 mg, 0.519 mmol) and  $\text{Et}_3\text{N}$  (70.8 mg, 0.692 mmol). The reaction mixture was heated under microwave irradiation at 120 °C for 60 min. *n*-BuOH was evaporated *in vacuo*, the residue was diluted with water, and extracted with EtOAc (3 x 7.0 mL). The combined organic extracts were dried ( $\text{MgSO}_4$ ) and concentrated to yield a pale yellow solid. The solid was resuspended (hexanes/ $\text{Et}_2\text{O}$ , 2:1), filtered, and subsequently rinsed (hexanes/ $\text{Et}_2\text{O}$ , 3:1). The filtered solid was dried under high-vacuum to yield **16q** (112 mg, 0.353 mmol, 82%) as a pale yellow solid: Mp 146.7-148.7°C; IR (ATR) 3252, 3217, 3211, 3205, 3123, 2974, 1616, 1580, 1569, 1457, 1444, 1347, 1308, 1292, 1221, 1198, 1059, 745  $\text{cm}^{-1}$ ;  $^1\text{H}$  NMR ( $\text{CDCl}_3$ , 300 MHz)  $\delta$  7.75 (bs, 1 H), 7.33-7.21 (m, 5 H), 5.99 (bs, 1 H), 4.83 (hept, 1 H,  $J = 6.9$  Hz), 3.91 (bs, 2 H), 3.00 (t, 2 H,  $J = 7.2$  Hz), 1.58 (d, 6 H,  $J = 6.6$  Hz);  $^{13}\text{C}$  NMR ( $\text{CDCl}_3$ , 75 MHz)  $\delta$  155.3, 149.7, 138.8, 137.5, 128.9, 128.6, 126.5, 118.9, 46.8, 42.0, 35.6, 22.9; EIMS  $m/z$  315 ( $\text{M}^+$ , 82), 337 (23), 226 (93), 213 (83), 169 (84), 146 (93), 119 (100), 104 (83), 77 (87), 65 (81); HRMS (EI)  $m/z$  calcd for  $\text{C}_{16}\text{H}_{18}\text{ClN}_5$  315.1251, found 315.1244.

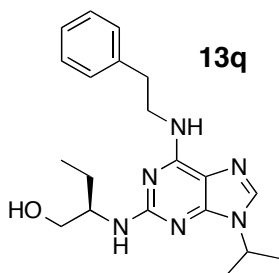

**(R)-2-(9-Isopropyl-6-(phenethylamino)-9H-purin-2-ylamino)butan-1-ol (13q).** A mixture of **16q** (51.0 mg, 0.161 mmol) and (*R*)-(-)-2-amino-1-butanol (72.0 mg, 0.792 mmol) was heated in a microwave vial immersed in an oil bath at 170 °C for 15 h. The reaction mixture was cooled to room temperature, diluted with water, and extracted with EtOAc (4 x 10.0 mL). The combined organic layers were washed with warm water (50-55 °C, 2 x 5 mL), dried (MgSO<sub>4</sub>), filtered, concentrated, and dried under high-vacuum at 70 °C (oil bath) for 2 h to yield an oily, yellow residue. The crude residue was purified by chromatography on SiO<sub>2</sub> (hexanes/EtOAc, 1:1, to EtOAc/MeOH/Et<sub>3</sub>N, 84:5:1) to yield **13q** (20.4 mg, 0.0554 mmol, 34%) as a light yellow oil: IR (ATR) 3252, 3217, 3211, 3205, 3123, 2974, 1616, 1580, 1569, 1457, 1444, 1347, 1308, 1292, 1220, 1198, 1059, 745, 727 cm<sup>-1</sup>; <sup>1</sup>H NMR (CDCl<sub>3</sub>, 300 MHz) δ 7.49 (s, 1 H), 7.34-7.20 (m, 5 H), 5.76 (bs, 1 H), 4.90 (d, 1 H, *J* = 5.7 Hz), 4.63 (hept, 1 H, *J* = 6.9 Hz), 3.95-3.80 (m, 4 H), 3.66 (dd, 2 H, *J* = 7.8, 10.5 Hz), 2.97 (t, 2 H, *J* = 7.2 Hz), 1.70-1.50 (m, 2 H), 1.53 (d, 6 H, *J* = 6.6 Hz), 1.05 (t, 3 H, *J* = 7.5 Hz); <sup>13</sup>C NMR (CDCl<sub>3</sub>, 75 MHz) δ 160.4, 155.2, 139.3, 134.7, 129.1, 128.9, 126.7, 115.0, 69.0, 56.7, 46.6, 42.1, 36.3, 25.3, 22.9, 11.3; EIMS *m/z* 368 (M<sup>+</sup>, 84), 338 (77), 277 (43), 205 (77), 163 (77), 105 (85), 91 (100); HRMS (EI) *m/z* calcd for C<sub>20</sub>H<sub>28</sub>N<sub>6</sub>O 368.2325, found 368.2308.

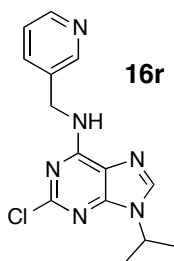

**2-Chloro-9-isopropyl-N-(pyridin-3-ylmethyl)-9H-purin-6-amine (16r).**<sup>9</sup> To a solution of **15c** (99.0 mg, 0.423 mmol) in *n*-BuOH (1.5 mL) were added 3-pyridinemethanamine (55.6 mg, 0.514 mmol) and Et<sub>3</sub>N (70.1 mg, 0.685 mmol). The reaction mixture was heated under microwave irradiation at 120 °C for 20 min. *n*-BuOH was evaporated *in*

*vacuo*. The residue was diluted with water (5.0 mL) and extracted with EtOAc (3 x 7.0 mL). The combined organic extracts were dried (MgSO<sub>4</sub>), filtered, and concentrated to yield a pale yellow solid. The solid residue was resuspended (hexanes/Et<sub>2</sub>O, 2:1), filtered, and the solid was rinsed (hexanes/Et<sub>2</sub>O, 3:1). The filtered solid was dried under high-vacuum to yield **16r** (112.0 mg, 0.389 mmol, 86%) as a pale yellow solid: <sup>1</sup>H NMR (CDCl<sub>3</sub>, 300 MHz) δ 8.65 (s, 1 H), 8.54 (dd, 2 H, *J* = 1.2, 4.5 Hz), 7.73-7.70 (m, 1 H), 7.28-7.23 (m, 1 H), 6.62 (bs, 1 H), 5.00-4.75 (m, 2 H), 4.83 (hept, 1 H, *J* = 6.9 Hz), 1.57 (d, 6 H, *J* = 6.6 Hz).

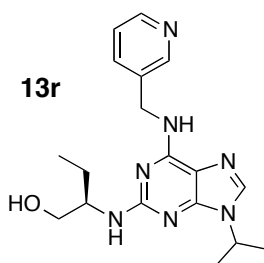

**(*R*)-2-(9-Isopropyl-6-(pyridin-3-ylmethylamino)-9*H*-purin-2-ylamino)butan-1-ol**

**(13r)**.<sup>9</sup> A mixture of **16r** (50.0 mg, 0.165 mmol) and (*R*)-(-)-2-amino-1-butanol (73.6 mg, 0.826 mmol) was heated in a microwave vial immersed in an oil bath at 170 °C for 15 h. The reaction mixture was cooled to room temperature, diluted with water (5.0 mL), and extracted with EtOAc (4 x 10 mL). The combined organic phases were washed with warm water (50-55° C, 2 x 5 mL), dried (MgSO<sub>4</sub>), filtered, concentrated, and dried under high-vacuum overnight to yield a yellow oil. The oil was dissolved in EtOAc and Et<sub>2</sub>O, and upon drop-wise addition of hexanes an off-white solid precipitated. The solid was rinsed (Et<sub>2</sub>O/hexanes, 2:1, 3x) by pipetting out the supernatant. After drying the solid under high-vacuum, **13r** (35.9 mg, 0.101 mmol, 61%) was obtained as a colorless amorphous solid: IR (ATR) 3252, 3217, 3211, 3205, 3123, 2974, 1616, 1580, 1569, 1457, 1444, 1347, 1308, 1292, 1221, 1198, 1059, 745, 727 cm<sup>-1</sup>; <sup>1</sup>H NMR (CDCl<sub>3</sub>, 300 MHz) δ 8.60 (d, 1 H, *J* = 1.5 Hz), 8.48 (dd, 1 H, *J* = 1.2, 4.5 Hz), 7.70-7.65 (m, 1 H), 7.50-7.44 (m, 1 H), 7.20 (dd, 1 H, *J* = 4.8 Hz, 7.8 Hz), 6.57 (bs, 1 H), 4.98-4.95 (m, 1 H), 4.80-4.70 (m, 2 H), 4.58 (hept, 1 H, *J* = 6.9 Hz), 3.91-3.86 (m, 1 H), 3.77 (dd, 1 H, *J* = 3.0, 7.8 Hz), 3.61 (dd, 2 H, *J* = 7.2, 10.8 Hz), 1.75-1.40 (m, 2 H), 1.50 (d, 6 H, *J* = 6.6 Hz), 0.97 (t, 3 H, *J* = 7.5 Hz).

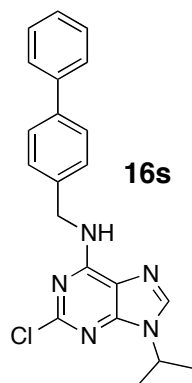

***N*-(Biphenyl-4-ylmethyl)-2-chloro-9-isopropyl-9*H*-purin-6-amine (16s).**<sup>2,9</sup> To a solution of **15c** (150.0 mg, 0.649 mmol) in *n*-BuOH (1.5 mL) were added 4-phenylbenzylamine (0.125 g, 0.682 mmol) and triethylamine (108.0 mg, 1.06 mmol) under an N<sub>2</sub> atmosphere. The reaction mixture was heated under microwave irradiation at 120 °C for 20 min. *n*-BuOH was evaporated, and the residue was dissolved in EtOAc and washed with water. The aqueous phase was further extracted with EtOAc, and the combined organic extracts were dried (MgSO<sub>4</sub>) and concentrated to yield a colorless solid. The solid was resuspended (hexanes/Et<sub>2</sub>O, 3:1), filtered, and rinsed (hexanes/Et<sub>2</sub>O, 3:1). The solid was dried under high-vacuum to yield **16s** (187.0 mg, 0.495 mmol, 76%) as an off-white solid: Mp 98-100 °C; IR (ATR, neat) 1615, 1571, 1350, 1308 cm<sup>-1</sup>; <sup>1</sup>H NMR (CDCl<sub>3</sub>, 600 MHz) δ 7.68 (bs, 1 H), 7.61-7.57 (m, 4 H), 7.48-7.42 (m, 4 H), 7.36 (t, 1 H, *J* = 7.8 Hz), 6.55 (bs, 1 H), 4.88 (bs, 2 H), 4.82 (hept, 1 H, *J* = 6.6 Hz), 1.56 (d, 6 H, *J* = 6.6 Hz); <sup>13</sup>C NMR (CDCl<sub>3</sub>, 150 MHz) δ 155.1, 154.3, 149.8, 140.6, 137.7, 137.0, 128.8, 128.4, 127.4, 127.3, 127.1, 118.9, 46.9, 44.3, 22.8; HRMS (ES) *m/z* calcd for C<sub>21</sub>H<sub>20</sub>ClN<sub>5</sub> [M+Na]<sup>+</sup> 400.1305, found 400.1308.

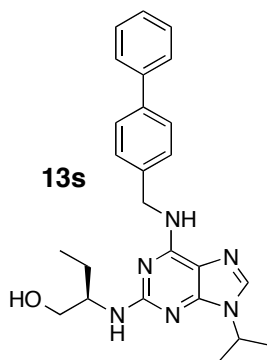

***(R)*-2-(6-(Biphenyl-4-ylmethylamino)-9-isopropyl-9*H*-purin-2-ylamino)butan-1-ol (13s).**<sup>2,9</sup> A mixture of **16s** (32.0 mg, 0.0821 mmol), potassium fluoride (1.50 mg, 0.0258

mmol), and (*R*)-(-)-2-amino-1-butanol (61.8 mg, 0.651 mmol) was heated in a microwave vial immersed in an oil bath at 170 °C for 12 h. The reaction mixture was cooled to room temperature, diluted with water, and extracted with EtOAc (4x). The combined organic phases were washed with warm water (50-55 °C, 2x), dried (MgSO<sub>4</sub>), filtered, concentrated, and dried under high-vacuum at 70 °C (oil bath) for 2 h to yield an amorphous yellow semi-solid. After addition of Et<sub>2</sub>O, the product was precipitated from the solution by drop-wise addition of hexanes (added in a minimal amount to achieve a homogeneous mixture). The solid was rinsed (Et<sub>2</sub>O/hexanes, 2:1) by pipetting out the supernatant. The solid was dried under high-vacuum at 40 °C overnight (to eliminate a volatile impurity, ~0.9 ppm) to obtain **13s** (25 mg, 0.0581 mmol, 71%) as a light yellow solid: Mp 116-119 °C; IR (ATR, neat) 3265, 1600, 1542, 1485 cm<sup>-1</sup>; <sup>1</sup>H NMR (CDCl<sub>3</sub>, 600 MHz) δ 7.60-7.52 (m, 4 H), 7.46-7.39 (m, 5 H), 7.34 (t, 1 H, *J* = 7.8 Hz), 6.52 (bs, 1 H), 4.97 (s, 1 H), 4.80 (bs, 2 H), 4.59 (hept, 1 H, *J* = 6.6 Hz), 3.96-3.88 (m, 1 H), 3.83 (dd, 1 H, *J* = 10.8, 2.4 Hz), 3.51 (dd, 1 H, *J* = 10.8, 7.8 Hz), 1.68-1.50 (m, 2 H), 1.51 (d, 6 H, *J* = 6.6 Hz), 1.02 (t, 3 H, *J* = 7.8 Hz); <sup>13</sup>C NMR (CDCl<sub>3</sub>, 150 MHz) δ 160.0, 154.8, 150.1, 140.8, 140.2, 138.0, 134.5, 128.7, 128.1, 127.3, 127.2, 127.0, 114.6, 68.3, 56.2, 46.4, 44.0, 25.0, 22.5, 22.4, 10.9; HRMS (ES) *m/z* calcd for C<sub>25</sub>H<sub>30</sub>N<sub>6</sub>O [M+H]<sup>+</sup> 431.2559, found 431.2538.

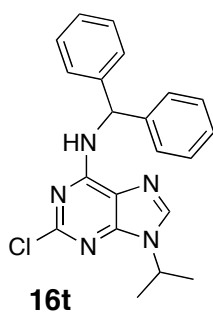

***N*-Benzhydryl-2-chloro-9-isopropyl-9*H*-purin-6-amine (16t).** To a solution of **15c** (100.0 mg, 0.433 mmol) in *n*-BuOH (1.5 mL) were added diphenylamine (95.2 mg, 0.519 mmol) and Et<sub>3</sub>N (70.8 mg, 0.692 mmol). The reaction mixture was heated under microwave irradiation at 120 °C for 20 min. *n*-BuOH was evaporated *in vacuo*, and the residue was diluted with water (5.0 mL), and extracted with EtOAc (3 x 7.0 mL). The combined organic extracts were dried (MgSO<sub>4</sub>), filtered, and concentrated to yield a pale yellow solid that was resuspended (hexanes/Et<sub>2</sub>O, 2:1), filtered, and washed



(hexanes/Et<sub>2</sub>O, 3:1). The filtrate was dried under high-vacuum to obtain **16t** (117 mg, 0.310 mmol, 72%) as a pale yellow solid: Mp 191.1-193.2 °C; IR (ATR) 3252, 3217, 3211, 3205, 3123, 2974, 1616, 1580, 1569, 1457, 1444, 1347, 1308, 1292, 1221, 1198, 1059, 745, 727 cm<sup>-1</sup>; <sup>1</sup>H NMR (CDCl<sub>3</sub>, 300 MHz) δ 7.63 (bs, 1H), 7.32-7.26 (m, 10 H), 6.76 (bs, 1 H), 4.80 (hept, 1 H, *J* = 6.6 Hz), 1.55 (d, 6 H, *J* = 6.9 Hz); <sup>13</sup>C NMR (CDCl<sub>3</sub>, 75 MHz) δ 154.4, 150.0, 141.5, 137.9, 128.8, 127.7, 127.5, 127.2, 118.8, 57.3, 46.9, 22.8; EIMS *m/z* 377 (M<sup>+</sup>, 98), 379 (35), 334 (25), 182 (44), 167 (100), 165 (61); HRMS (EI) *m/z* calcd for C<sub>21</sub>H<sub>20</sub>ClN<sub>5</sub> 377.1407, found 377.1400.

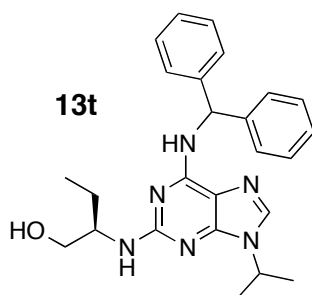

**(*R*)-2-(6-(Benzhydrylamino)-9-isopropyl-9*H*-purin-2-ylamino)butan-1-ol (13t).** A mixture of **16t** (50.0 mg, 0.132 mmol) and (*R*)-(-)-2-amino-1-butanol (87.5 mg, 0.981 mmol) was heated in a microwave vial immersed in an oil bath at 170 °C for 15 h. The reaction mixture was cooled to room temperature, diluted with water (5.0 mL), and extracted with EtOAc (4 x 10.0 mL). The combined organic layers were washed with warm water (50-55 °C, 2 x 5.0 mL), dried (MgSO<sub>4</sub>), filtered, concentrated, and dried under high-vacuum overnight to obtain a yellow oil. The oil was dissolved in EtOAc, resuspended in Et<sub>2</sub>O, and hexanes was added drop-wise to achieve a homogeneous supernatant. An off-white solid precipitated from the solution, and the solid was rinsed (Et<sub>2</sub>O/hexanes, 2:1) by pipetting out the supernatant and dried under high-vacuum to obtain **13t** (36.4 mg, 0.0845 mmol, 64%) as an off-white solid: Mp 72.2-75.0 °C; IR (ATR) 3286, 3086, 3068, 3055, 3038, 3030, 1647, 1627, 1592, 1575, 1560, 1446, 1314, 1273, 1204, 1174, 1159, 1150, 1075, 1027, 997, 943, 936, 917, 865, 813, 764, 719, 701, 691 cm<sup>-1</sup>; <sup>1</sup>H NMR (CDCl<sub>3</sub>, 300 MHz): δ 7.46 (s, 1 H), 7.34-7.26 (m, 10 H), 6.53 (bs, 1 H), 6.41 (bs, 1 H), 4.81 (d, 1 H, *J* = 5.1 Hz), 4.59 (hept, 1 H, *J* = 6.6 Hz), 3.78-3.70 (m, 2 H), 3.57-3.51 (dd, 2 H, *J* = 7.5, 9.9 Hz), 1.6-1.3 (m, 2 H), 1.51 (d, 6 H, *J* = 6.6 Hz), 0.96 (t, 3 H, *J* = 7.5 Hz); <sup>13</sup>C NMR (CDCl<sub>3</sub>, 75 MHz) δ 159.9, 153.9, 142.2, 134.6, 128.5, 127.6,

127.3, 114.6, 67.9, 57.9, 56.1, 46.4, 24.9, 22.6, 10.9; EIMS  $m/z$  430 ( $M^+$ , 89), 400 (78), 399 (100), 358 (36), 168 (63), 165 (91), 152 (59); HRMS (EI)  $m/z$  calcd for  $C_{25}H_{30}N_6O$  430.2481, found 430.2486.

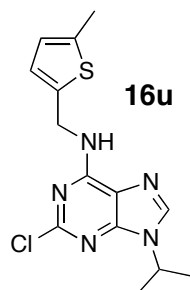

**2-Chloro-9-isopropyl-N-((5-methylthiophen-2-yl)methyl)-9H-purin-6-amine (16u).** To a solution of **15c** (74.4 mg, 0.322 mmol) in *n*-BuOH (1.25 mL) was added (5-methylthien-2-yl)methylamine•HCl (55.7 mg, 0.340 mmol) and freshly distilled  $Et_3N$  (98.0 mg, 0.969 mmol) under an  $N_2$  atmosphere. The reaction mixture was subjected to microwave irradiation at 120 °C for 30 min. White crystals were observed upon completion of the heating. *n*-BuOH was evaporated *in vacuo*, and the residue was dissolved in EtOAc (20.0 mL) and deionized water (10.0 mL). The aqueous phase was further extracted with EtOAc (3 x 10.0 mL), and the combined organic layers were dried ( $MgSO_4$ ), filtered, and concentrated to yield a light yellow solid. The solid was resuspended (hexanes/ $Et_2O$ , 3:1), and the precipitated solid was filtered through a fritted funnel and dried under high-vacuum overnight to obtain **16u** (96.9 mg, 0.301 mmol, 94%) as light yellow amorphous solid: IR (ATR, neat) 3340, 3256, 3213, 3184, 3137, 3120, 3064, 2977, 2967, 2921, 1705, 1676, 1620, 1569, 1538, 1463, 1351, 1310, 1290, 1256, 1224, 1200, 1159, 1098, 1070, 1036, 1010, 969, 956, 798, 787, 761, 736, 725, 695, 678, 658  $cm^{-1}$ ;  $^1H$  NMR (300 MHz,  $CDCl_3$ )  $\delta$  7.77 (bs, 1 H), 6.85 (d, 1 H,  $J = 3.3$  Hz), 6.60 (d, 1 H,  $J = 3.3$  Hz), 6.25 (bs, 1 H), 4.89 (bs, 2 H), 4.83 (sept, 1 H,  $J = 6.7$  Hz), 2.45 (s, 3 H), 1.58 (d, 6 H,  $J = 6.6$  Hz);  $^{13}C$  NMR (75 MHz,  $CDCl_3$ )  $\delta$  154.8, 154.2, 149.9, 139.9, 138.5, 137.8, 126.0, 124.7, 118.8, 46.9, 39.6, 22.8, 15.4; HRMS (ES)  $m/z$  calcd for  $C_{14}H_{16}N_5SCl$  321.0850, found 321.0813.

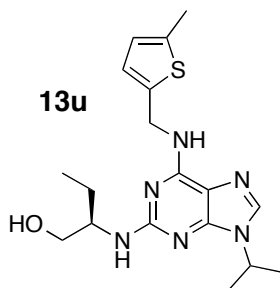

**(*R*)-2-(9-Isopropyl-6-((5-methylthiophen-2-yl)methylamino)-9*H*-purin-2-ylamino)butan-1-ol (13u).** A mixture of **16u** (65.3 mg, 0.203 mmol) and (*R*)-2-aminobutan-1-ol (96.2 mg, 101  $\mu$ L, 1.01 mmol, 5 equiv) were heated in a microwave vial immersed in an oil bath at 170  $^{\circ}$ C for 8 h. The reaction mixture was cooled to room temperature, diluted with water (15 mL), and extracted with EtOAc (3 x 20.0 mL). The combined organic phases were washed with warm water (2 x 10.0 mL, 50-55  $^{\circ}$ C), dried ( $\text{MgSO}_4$ ), filtered, concentrated, and dried under high-vacuum at 50  $^{\circ}$ C (oil bath) for 2 h to yield a yellow solid. The crude residue was purified by chromatography on  $\text{SiO}_2$  (hexanes/EtOAc, 9:1) to yield **13u** (61.8 mg, 0.165 mmol, 81%) as a light yellow foam: IR (ATR, neat) 3341, 3272, 3121, 2964, 2925, 2052, 2185, 1681, 1605, 1544, 1512, 1493, 1456, 1380, 1311, 1253, 1202, 1161, 1102, 1042, 1025, 971, 904, 861, 800, 755, 727, 723, 694, 675  $\text{cm}^{-1}$ ;  $^1\text{H}$  NMR (400 MHz,  $\text{CDCl}_3$ )  $\delta$  7.47 (s, 1 H), 6.79 (d, 1 H,  $J = 3.6$  Hz), 6.58-6.56 (m, 1 H), 5.98 (bs, 1 H), 5.25-5.00 (b, 1 H), 4.90 (app d, 1 H,  $J = 5.6$  Hz), 4.82 (bs, 2 H), 4.59 (sept, 1 H,  $J = 6.8$  Hz), 3.96-3.88 (m, 1 H), 3.84 (dd, 1 H,  $J = 10.4, 2.0$  Hz), 3.65 (dd, 1 H,  $J = 10.8, 8.0$  Hz), 2.42 (s, 3 H), 1.70-1.50 (m, 2 H), 1.52 (d, 6 H,  $J = 6.8$  Hz), 1.04 (t, 3 H,  $J = 7.6$  Hz);  $^{13}\text{C}$  NMR (100 MHz,  $\text{CDCl}_3$ )  $\delta$  160.0, 154.4, 150.4, 139.7, 139.0, 134.6, 125.8, 124.7, 114.7, 68.6, 56.4, 46.5, 39.7, 29.7, 25.0, 22.6, 15.4, 11.0; HRMS (ESI)  $m/z$  calcd for  $\text{C}_{18}\text{H}_{27}\text{N}_6\text{OS}$   $[\text{M}+\text{Na}]^+$  397.1767, found 397.1787.

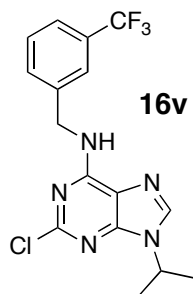

**2-Chloro-9-isopropyl-N-(3-(trifluoromethyl)benzyl)-9H-purin-6-amine (16v).**<sup>10</sup> To a solution of **15c** (65.8 mg, 0.273 mmol) in *n*-BuOH (1.0 mL) were added 3-(trifluoromethyl)benzylamine (52.4 mg, 0.300 mmol) and Et<sub>3</sub>N (46.1 mg, 0.456 mmol) under a nitrogen atmosphere. The reaction mixture was heated with microwave irradiation at 120 °C for 30 min. The *n*-BuOH was evaporated, and the residue was dissolved in EtOAc (20.0 mL) and washed with water (10.0 mL). The aqueous phase was further extracted with EtOAc (2 x 10.0 mL), and the combined organic extracts were dried (MgSO<sub>4</sub>), filtered, and concentrated to yield a colorless solid. The solid was resuspended (hexanes/Et<sub>2</sub>O, 3:1), filtered, washed (hexanes/Et<sub>2</sub>O, 3:1), and dried under high-vacuum to yield **16v** (63.0 mg, 0.170 mmol, 60%) as a colorless amorphous solid: IR (ATR, neat) 3250, 3150, 2990, 2925, 1625, 1446, 1313, 1230, 1159, 1140, 1099, 980, 930, 700 cm<sup>-1</sup>; <sup>1</sup>H NMR (300 MHz, CDCl<sub>3</sub>) δ 7.77 (s, 1 H), 7.63 (s, 1 H), 7.59 (d, 1 H, *J* = 7.5 Hz), 7.56 (d, 1 H, *J* = 7.8 Hz), 7.47 (t, 1 H, *J* = 7.5 Hz), 6.33 (bs, 1 H), 4.90 (bs, 2 H), 4.83 (sept, 1 H, *J* = 6.8 Hz), 1.58 (d, 6 H, *J* = 6.9 Hz); <sup>13</sup>C NMR (75 MHz, CDCl<sub>3</sub>) δ 155.1, 154.2, 150.0, 139.4, 137.8, 131.2, 130.9 (q, *J* = 32.2 Hz), 129.3, 124.4, 124.3, 124.0 (q, *J* = 270.1 Hz), 118.8, 47.0, 43.9, 22.7; HRMS [EI] *m/z* calcd for [C<sub>16</sub>H<sub>15</sub>ClF<sub>3</sub>N<sub>5</sub>] 369.0968, found 369.9640.

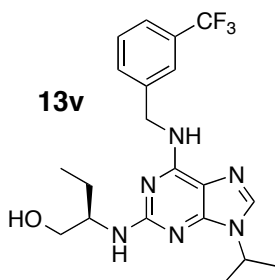

**(R)-2-(9-Isopropyl-6-(3-(trifluoromethyl)benzylamino)-9H-purin-2-ylamino)butan-1-ol (13v).** A mixture of **16v** (56.2 mg, 0.152 mmol) and (*R*)-(-)-2-aminobutan-1-ol (95.0

<sup>10</sup> Dvorak, L.; Popa, I.; Starha, P.; Travnicek, Z., "In vitro cytotoxic-active platinum(II) complexes derived from carboplatin and involving purine derivatives." *Eur. J. Inorg. Chem.* **2010**, 3441-3448.

mg, 1.07 mmol) was heated in a microwave vial immersed in an oil bath at 170 °C for 8 h. The reaction mixture was cooled to room temperature, diluted with water (10.0 mL), and extracted with EtOAc (2 x 15.0 mL). The combined organic phases were washed with warm water (2 x 5.0 mL, 50-55 °C), dried (MgSO<sub>4</sub>), filtered, concentrated, and dried under high-vacuum at 50 °C (oil bath temperature) for 2 h to yield a yellow solid. After addition of Et<sub>2</sub>O, an off-white solid precipitated. The solid was rinsed (Et<sub>2</sub>O, 3x) by pipetting out the supernatant and dried under high-vacuum overnight at 40 °C to yield **13v** (16.1 mg, 0.0381 mmol, 25%) as a colorless amorphous solid: Mp 149.9-153.6 °C; IR (ATR, neat) 3254, 3059, 2934, 1621, 1599, 1535, 1323, 1260, 1161, 1118, 1062, 797, 701 cm<sup>-1</sup>; <sup>1</sup>H NMR (300 MHz, CDCl<sub>3</sub>) δ 7.77 (s, 1 H), 7.58-7.51 (m, 3 H), 7.44 (t, 1 H, *J* = 7.5 Hz), 6.22 (bs, 1 H), 4.89 (d, 1 H, *J* = 5.7 Hz), 4.83 (bs, 2 H), 4.62 (sept, 1 H, *J* = 6.8 Hz), 3.95-3.80 (m, 1 H), 3.82 (dd, 1 H, *J* = 2.7, 10.5 Hz), 3.63 (dd, 1 H, *J* = 7.5, 10.5 Hz), 1.70-1.40 (m, 2 H), 1.54 (d, 6 H, *J* = 6.9 Hz), 1.01 (t, 3 H, *J* = 7.5 Hz); <sup>13</sup>C NMR (175 MHz, CDCl<sub>3</sub>) δ 159.9, 154.6, 150.3, 140.0, 134.7, 130.9, 130.8 (q, *J* = 31.5 Hz), 129.0, 124.4 (q, *J* = 3.5 Hz), 124.1 (q, *J* = 3.5 Hz), 124.1 (q, *J* = 271.3 Hz), 114.5, 68.2, 56.2, 46.5, 43.8, 24.9, 22.5 (2 C), 10.8; HRMS (ES) *m/z* calcd for C<sub>20</sub>H<sub>26</sub>F<sub>3</sub>N<sub>6</sub>O [M+H]<sup>+</sup> 423.2120, found 423.2103.

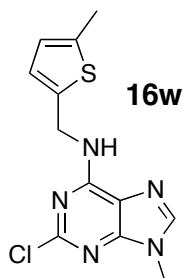

**2-Chloro-9-methyl-N-[(5-methylthiophen-2-yl)methyl]-9H-purin-6-amine (16w).** To a solution of **15b** (30.0 mg, 0.148 mmol, 1 eq) in dry *n*-BuOH (0.6 mL, 0.25 M) were added (5-methylthien-2-yl)methylamine•HCl (25.4 mg, 0.155 mmol, 1.05 eq) and freshly distilled triethylamine (44.9 mg, 0.443 mmol, 3 eq, 0.06 mL) under nitrogen. The reaction mixture was subjected to microwave irradiation at 120 °C for 35 min. The *n*-BuOH was evaporated, and the residue was dissolved in EtOAc (20 mL) and deionized water (10 mL). The layers were separated and the aqueous layer was further extracted with EtOAc (3 x 10 mL). The combined organic layers were dried (MgSO<sub>4</sub>) and concentrated under reduced pressure to yield a yellow solid. The solid was washed with Et<sub>2</sub>O and dried

under high-vacuum to yield **16w** (37.5 mg, 0.128 mmol, 86%) as a light yellow solid: Mp 217.5-219.6 °C; IR (ATR, neat) 3058, 1607, 1575, 1340, 1303, 1232, 1094, 917, 796, 693 cm<sup>-1</sup>; <sup>1</sup>H NMR (400 MHz, DMSO-*d*<sub>6</sub>) δ 8.76 (bs, 1 H), 8.11 (s, 1 H), 6.79 (d, 1 H, *J* = 3.3 Hz), 6.60 (app d, 1 H, *J* = 2.2 Hz), 4.68 (d, 2 H, *J* = 5.6 Hz), 3.69 (s, 3 H), 2.34 (s, 3 H); <sup>13</sup>C NMR (100 MHz, DMSO-*d*<sub>6</sub>) δ 154.4, 152.9, 150.4, 142.1, 139.6, 138.4, 125.7, 124.6, 118.1, 38.5, 29.6, 14.9; HRMS (ES) *m/z* calcd for C<sub>12</sub>H<sub>11</sub>N<sub>5</sub>SCl [M-H]<sup>+</sup> 292.0424, found 292.0428.

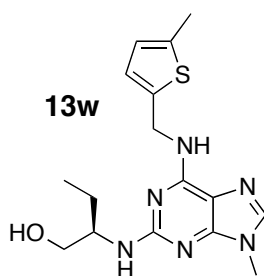

**(2*R*)-2-[(9-Methyl-6-[(5-methylthiophen-2-yl)methyl]amino}-9H-purin-2-yl)amino]butan-1-ol (13w)**. A mixture of **16w** (18.2 mg, 0.0620 mmol, 1 eq) and (*R*)-(-)-2-amino-1-butanol (27.6 mg, 0.029 mL, 0.276 mmol, 5 eq) was heated in a sealed vial in an oil bath at 170 °C for 15 h. The reaction mixture was cooled at room temperature, treated with water (15 mL) and then extracted with EtOAc (3 x 20 mL). The combined organic layers were washed with warm water (2 x 10 mL, 50-55 °C), dried (MgSO<sub>4</sub>), filtered and concentrated. Purification by chromatography on SiO<sub>2</sub> (EtOAc/MeOH/Et<sub>3</sub>N, 94:5:1) gave a yellow oil which was dried under high-vacuum at 50 °C for 2 h to yield **13w** (20.0 mg, 0.0577 mmol, 93%) as a yellow oil which solidified to a dark yellow solid: Mp 56.4-58.3 °C; IR (ATR, neat) 2934, 1601, 1545, 1512, 1415, 1215, 785 cm<sup>-1</sup>; <sup>1</sup>H NMR (400 MHz, CDCl<sub>3</sub>) δ 7.35 (s, 1 H), 6.77 (d, 1 H, *J* = 3.2 Hz), 6.55 (app d, 1 H, *J* = 2.3 Hz), 6.20 (bs, 1 H), 4.97 (d, 1 H, *J* = 6.1 Hz), 4.80 (bs, 2 H), 3.95 (app pent, 1 H, *J* = 5.8 Hz), 3.82 (dd, 1 H, *J* = 10.7, 2.6 Hz), 3.63 (dd, 1 H, *J* = 10.7, 7.5 Hz), 3.61 (s, 3 H), 2.41 (s, 3 H), 1.66-1.52 (m, 2 H), 1.02 (t, 3 H, *J* = 7.4 Hz); <sup>13</sup>C NMR (100 MHz, CDCl<sub>3</sub>) δ 160.2, 154.3, 151.1, 139.5, 139.1, 137.6, 125.7, 124.6, 114.1, 67.9, 56.0, 39.5, 29.3, 25.0, 15.3, 10.9; HRMS (ES) *m/z* calcd for C<sub>16</sub>H<sub>23</sub>N<sub>6</sub>OS [M+H]<sup>+</sup> 347.1654, found 347.1659.

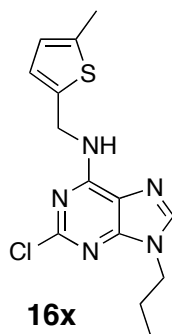

**2-Chloro-*N*-[(5-methylthiophen-2-yl)methyl]-9-propyl-9*H*-purin-6-amine (16x).** To a solution of **15a** (33.9 mg, 0.147 mmol, 1 eq.) in *n*-BuOH (0.6 mL, 0.25 M) were added (5-methylthien-2-yl)methylamine·HCl (25.2 mg, 0.153 mmol, 1.05 eq.) and freshly distilled triethylamine (44.5 mg, 0.440 mmol, 3.00 equiv). The reaction mixture was subjected to microwave irradiation at 120 °C for 30 min. The residue was dissolved in EtOAc (20 mL) and deionized water (10 mL). The aqueous phase was further extracted with EtOAc (3 x 10 mL), and the combined organic layers were dried (MgSO<sub>4</sub>), filtered and concentrated under reduced pressure. Purification on SiO<sub>2</sub> (EtOAc/hexanes, 1:1) gave **16x** (42.1 mg, 0.131 mmol, 89%) as a colorless solid: Mp 150.3-151.4 °C; IR (ATR, neat) 3256, 3208, 2994, 2872, 1616, 1573, 1538, 1472, 1303, 1251, 1219, 1085, 811 cm<sup>-1</sup>; <sup>1</sup>H NMR (400 MHz, CDCl<sub>3</sub>) δ 7.57 (bs, 1 H), 6.80 (d, 1 H, *J* = 3.3 Hz), 6.75 (bs, 1 H), 6.57 (app dd, 1 H, *J* = 3.3, 1.0 Hz), 4.87 (bs, 2 H), 4.09 (t, 2 H, *J* = 7.2 Hz), 2.42 (s, 3 H), 1.88 (sext, 2 H, *J* = 7.4 Hz), 0.94 (t, 3 H, *J* = 7.4 Hz); <sup>13</sup>C NMR (100 MHz, CDCl<sub>3</sub>) δ 154.8, 154.5, 150.5, 140.4, 140.2, 138.1, 126.4, 124.9, 118.7, 45.6, 39.8, 23.5, 15.5, 11.2; HRMS (ES) *m/z* calcd for C<sub>14</sub>H<sub>17</sub>N<sub>5</sub>SCl [M+H]<sup>+</sup> 322.0893, found 322.0890.

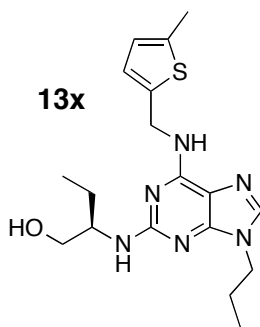

**(2*R*)-2-[(6-[(5-Methylthiophen-2-yl)methyl]amino)-9-propyl-9*H*-purin-2-yl]amino]butan-1-ol (13x).** A mixture of **16x** (20.0 mg, 0.0621 mmol, 1 equiv) and (*R*)-(-)-2-amino-1-butanol (27.7 mg, 0.311 mmol, 5 equiv) was heated in a sealed vial in an oil

bath at 170 °C for 15 h. The reaction mixture was cooled to room temperature and water was added (15 mL). The mixture was extracted with EtOAc (3 x 20 mL), dried (MgSO<sub>4</sub>), filtered and concentrated. Purification by chromatography on SiO<sub>2</sub> (EtOAc/MeOH, 98:2) provided **13x** (21.2 mg, 0.0566 mmol, 91%) as a colorless solid: Mp 124.8-129.6 °C; IR (ATR, neat) 3418, 3374, 3260, 2958, 1605, 1512, 1402, 1333, 1215, 798, 796, 783 cm<sup>-1</sup>; <sup>1</sup>H NMR (400 MHz, CDCl<sub>3</sub>) δ 7.40 (s, 1 H), 6.79 (d, 1 H, *J* = 3.4 Hz), 6.57-6.56 (m, 1 H), 6.04 (bs, 1 H), 4.96 (app d, 1 H, *J* = 5.5 Hz), 4.82 (bs, 2 H), 3.97-3.88 (m, 3 H), 3.83 (dd, 1 H, *J* = 10.7, 2.5 Hz), 3.64 (dd, 1 H, *J* = 10.7, 7.7 Hz), 2.42 (s, 3 H), 1.84 (sext, 2 H, *J* = 7.2 Hz), 1.70-1.51 (m, 2 H), 1.03 (t, 3 H, *J* = 7.4 Hz), 0.93 (t, 3 H, *J* = 7.2 Hz); <sup>13</sup>C NMR (100 MHz, CDCl<sub>3</sub>) δ 160.1, 154.4, 151.0, 139.8, 139.1, 137.4, 126.0, 124.8, 114.5, 68.6, 56.5, 45.2, 39.7, 25.2, 23.3, 15.5, 11.3, 11.1; HRMS (ES) *m/z* calcd for C<sub>18</sub>H<sub>27</sub>N<sub>6</sub>OS [M+H]<sup>+</sup> 375.1967, found 375.1968.



kb-NB-184-95

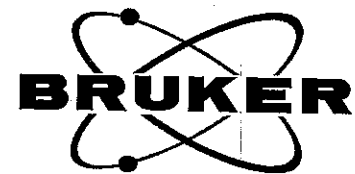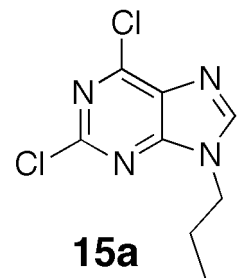

8.105  
8.096

4.216  
4.204  
4.195  
4.183

1.934  
1.922  
1.911  
1.901  
1.889  
0.941  
0.929  
0.920  
0.907

NAME kb-NB-184-95  
EXPNO 3  
PROCNO 1  
Date\_ 20090717  
Time\_ 9.44  
INSTRUM spect  
PROBHD 5 mm CPTCI 1H-  
PULPROG zg30  
TD 65536  
SOLVENT CDC13  
NS 16  
DS 2  
SWH 12376.237 Hz  
FIDRES 0.188846 Hz  
AQ 2.6477449 sec  
RG 18  
DW 40.400 usec  
DE 6.50 usec  
TE 298.0 K  
D1 1.00000000 sec  
TD0 1

===== CHANNEL f1 =====  
NUC1 1H  
P1 8.00 usec  
PL1 4.00 dB  
PL1W 7.00000000 W  
SF01 600.1337060 MHz  
SI 32768  
SF 600.1300057 MHz  
WDW EM  
SSB 0  
LB 0.30 Hz  
GB 0  
PC 1.00

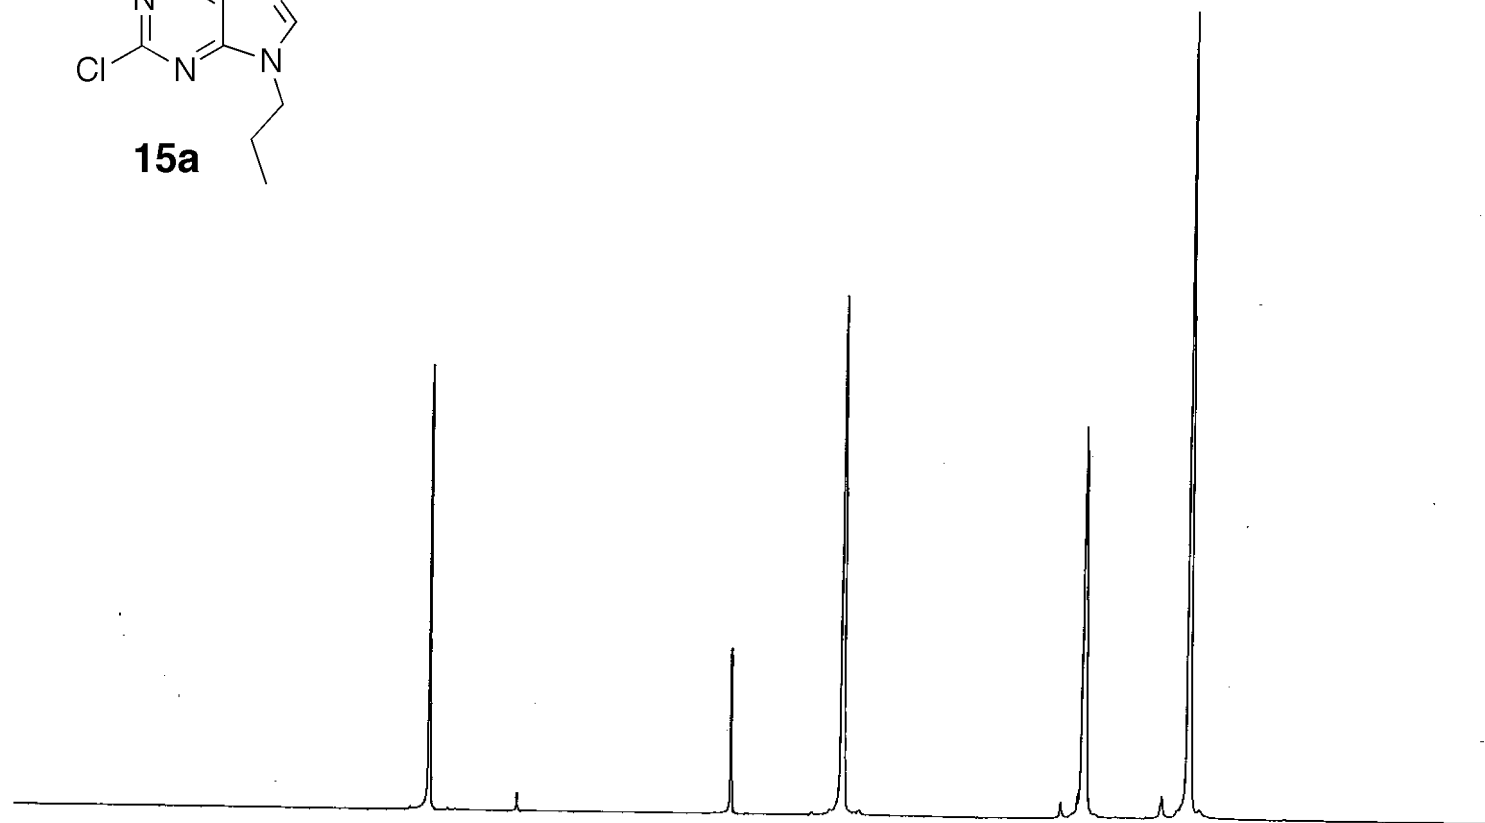

11 10 9 8 7 6 5 4 3 2 1 0 -1 ppm

1.00

2.14

2.19

3.30

kb-NB-184-95

153.03  
152.56  
151.36  
145.80

130.54

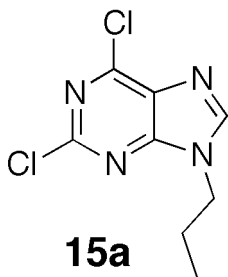

53.37

46.09

22.97

10.93

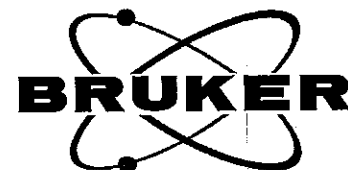

NAME kb-NB-184-95  
EXPNO 4  
PROCNO 1  
Date 20090717  
Time 10.00  
INSTRUM spect  
PROBHD 5 mm CPTCI 1H-  
PULPROG zgpg30  
TD 65536  
SOLVENT CDCl3  
NS 256  
DS 4  
SWH 35971.223 Hz  
FIDRES 0.548877 Hz  
AQ 0.9110143 sec  
RG 11585.2  
DW 13.900 usec  
DE 6.50 usec  
TE 298.0 K  
D1 2.00000000 sec  
D11 0.03000000 sec  
TD0 1

==== CHANNEL f1 =====  
NUC1 13C  
P1 12.00 usec  
PL1 -0.70 dB  
PL1W 82.63385773 W  
SFO1 150.9178988 MHz

==== CHANNEL f2 =====  
CPDPRG2 waltz16  
NUC2 1H  
PCPD2 80.00 usec  
PL2 4.00 dB  
PL12 24.00 dB  
PL13 27.00 dB  
PL2W 7.00000000 W  
PL12W 0.07000000 W  
PL13W 0.03508311 W  
SFO2 600.1324005 MHz  
SI 32768  
SF 150.9028306 MHz  
WDW EM  
SSB 0  
LB 1.00 Hz  
GB 0  
PC 1.40

180 160 140 120 100 80 60 40 20 ppm

kb-NB-184-96

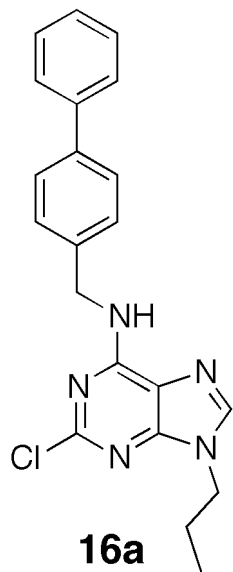

7.592  
7.578  
7.574  
7.561  
7.461  
7.447  
7.434  
7.371  
7.359  
7.346  
6.888

4.879  
4.070  
4.059  
4.048

1.874  
1.862  
1.850  
1.839  
0.931  
0.920  
0.908

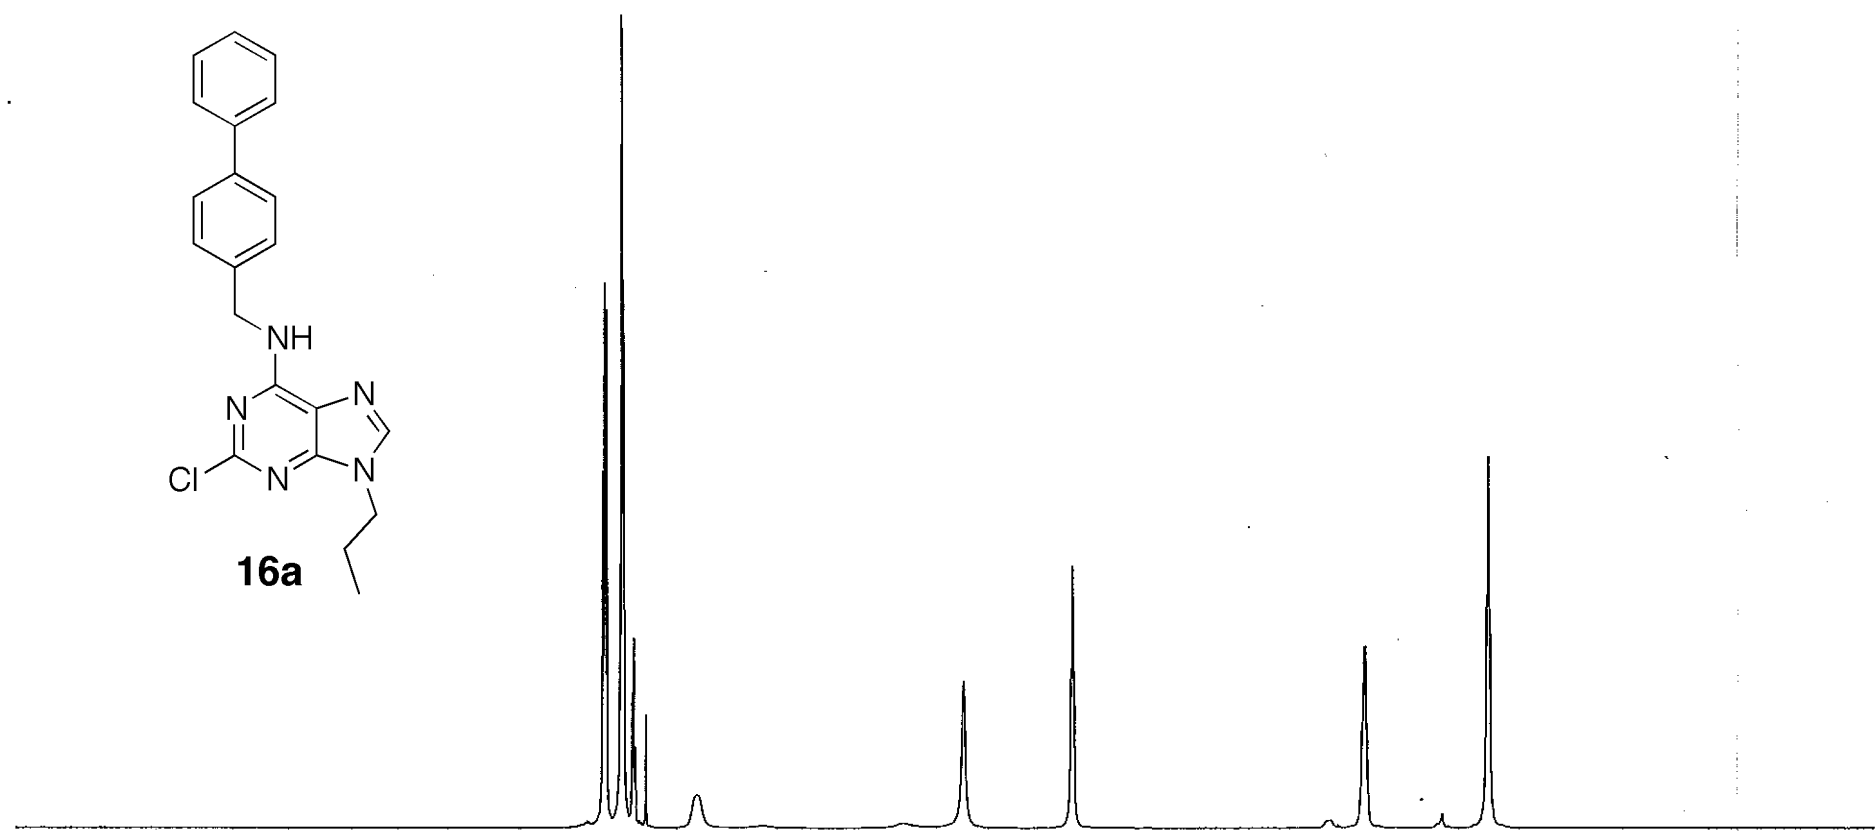

11 10 9 8 7 6 5 4 3 2 1 0 -1 ppm

3.94  
4.57  
0.99  
0.85

1.73

1.99

2.00

3.06

kb-NB-184-96

155.10  
154.49  
150.28  
140.52  
140.21  
137.02  
128.78  
128.39  
127.36  
127.33  
126.98  
118.63

45.44  
44.29

23.28

11.04

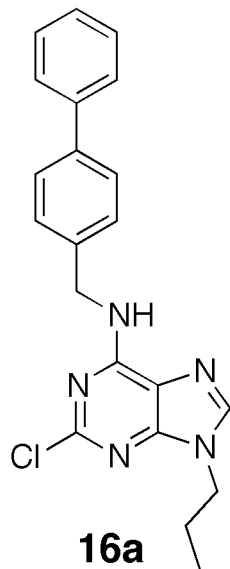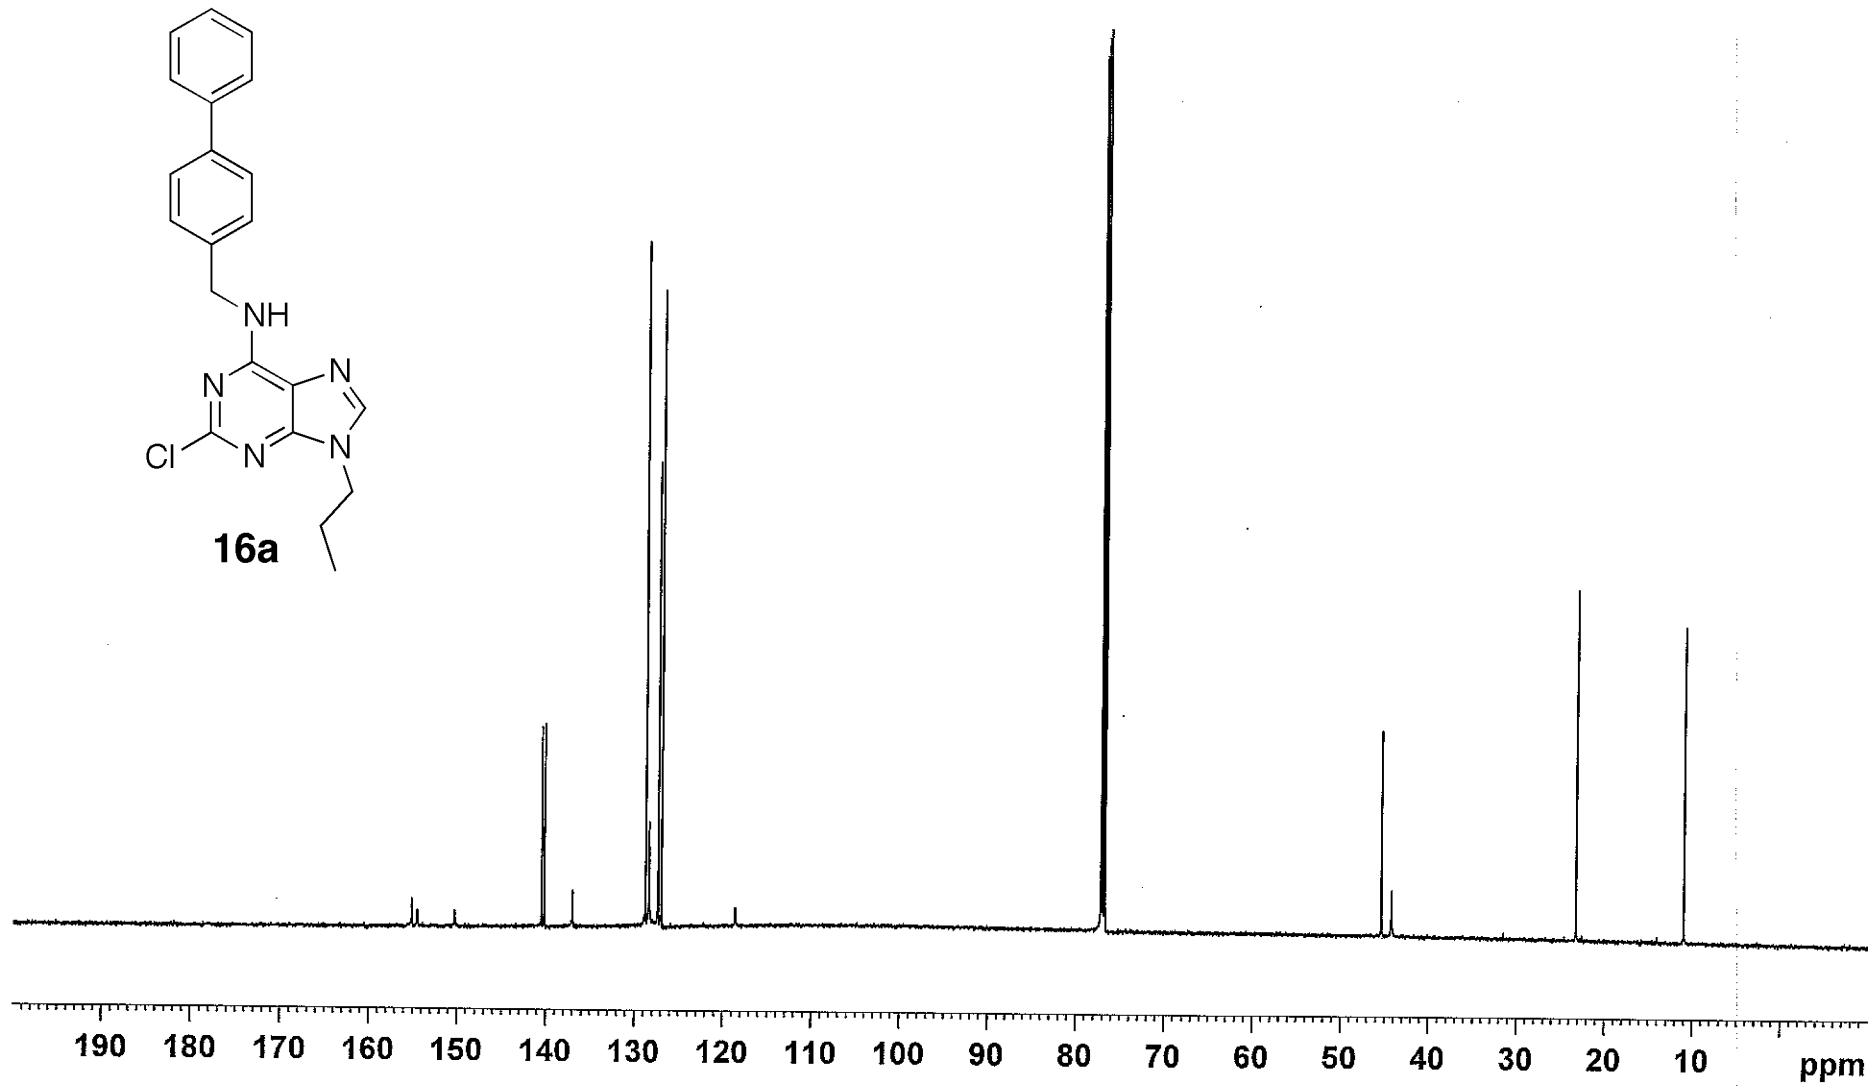

kb-NB-213-02

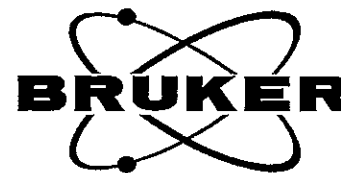

7.584  
7.571  
7.551  
7.538  
7.448  
7.432  
7.420  
7.356  
7.344  
7.327  
7.270  
6.465  
5.267  
5.186  
4.978  
4.812  
4.774  
3.939  
3.927  
3.916  
3.830  
3.813  
3.652  
3.639  
3.623  
1.846  
1.834  
1.822  
1.810  
1.637  
1.625  
1.614  
1.603  
1.575  
1.563  
1.551  
1.540  
1.025  
1.012  
1.000  
0.934  
0.922  
0.910

NAME kb-NB-213-02  
EXPNO 1  
PROCNO 1  
Date\_ 20090723  
Time 10.21  
INSTRUM spect  
PROBHD 5 mm CPTCI 1H-  
PULPROG zg30  
TD 65536  
SOLVENT CDCl3  
NS 16  
DS 2  
SWH 12376.237 Hz  
FIDRES 0.188846 Hz  
AQ 2.6477449 sec  
RG 32  
DW 40.400 usec  
DE 6.50 usec  
TE 298.0 K  
D1 1.00000000 sec  
TDO 1

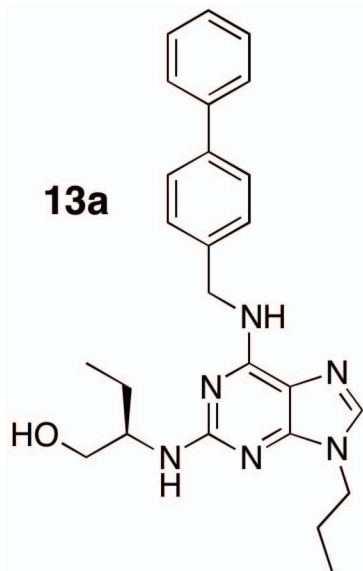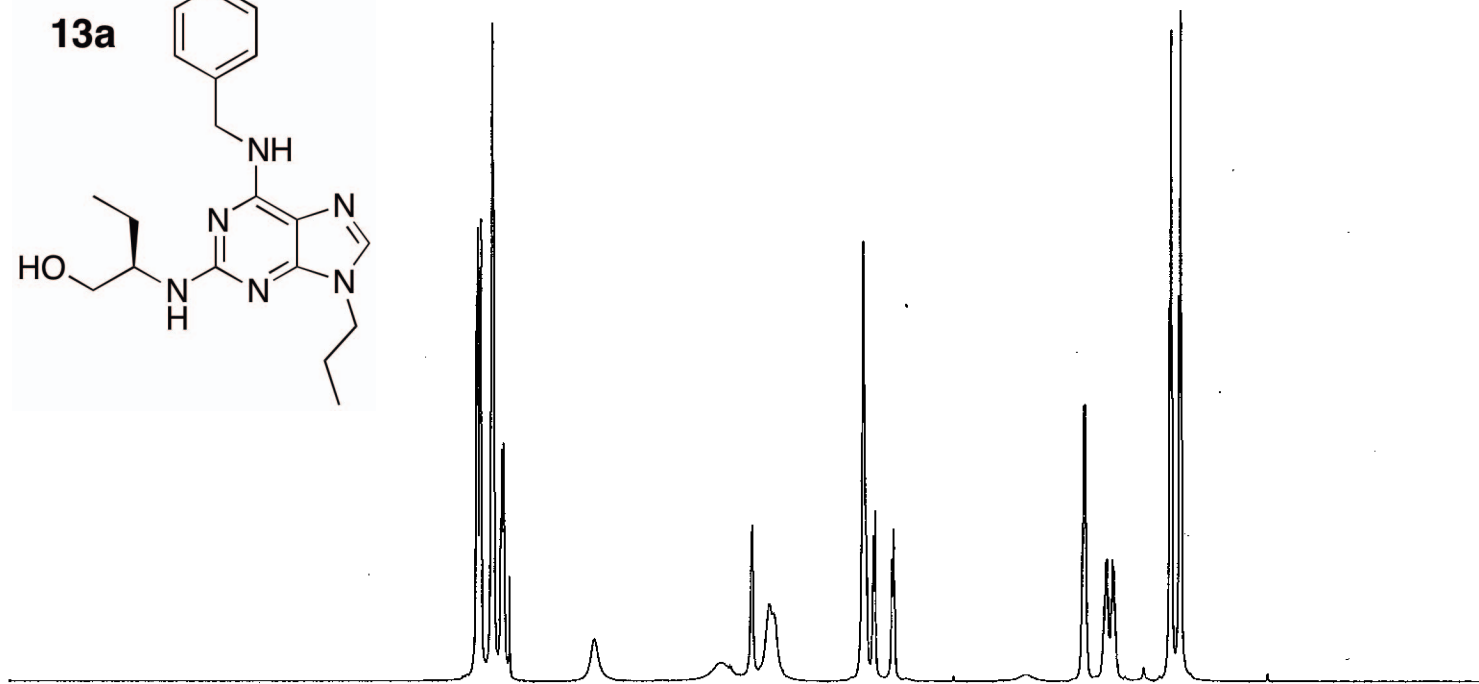

===== CHANNEL f1 =====  
NUC1 1H  
P1 8.00 usec  
PL1 4.00 dB  
PL1W 7.00000000 W  
SFO1 600.1337060 MHz  
SI 32768  
SF 600.1300044 MHz  
WDW EM  
SSB 0  
LB 0.30 Hz  
GB 0  
PC 1.00

kb-NB-213-02

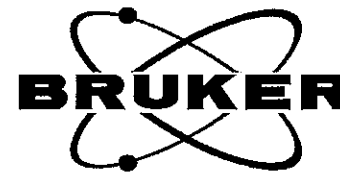

NAME kb-NB-213-02  
 EXPNO 2  
 PROCNO 1  
 Date 20090723  
 Time 10.37  
 INSTRUM spect  
 PROBHD 5 mm CPTCI 1H-  
 PULPROG zgpg30  
 TD 65536  
 SOLVENT CDC13  
 NS 256  
 DS 4  
 SWH 35971.223 Hz  
 FIDRES 0.548877 Hz  
 AQ 0.9110143 sec  
 RG 16384  
 DW 13.900 usec  
 DE 6.50 usec  
 TE 298.0 K  
 D1 2.00000000 sec  
 D11 0.03000000 sec  
 TD0 1

===== CHANNEL f1 =====  
 NUC1 13C  
 P1 12.00 usec  
 PL1 -0.70 dB  
 PL1W 82.63385773 W  
 SFO1 150.9178988 MHz

===== CHANNEL f2 =====  
 CPDPRG2 waltz16  
 NUC2 1H  
 PCPD2 80.00 usec  
 PL2 4.00 dB  
 PL12 24.00 dB  
 PL13 27.00 dB  
 PL2W 7.00000000 W  
 PL12W 0.07000000 W  
 PL13W 0.03508311 W  
 SFO2 600.1324005 MHz  
 SI 32768  
 SF 150.9028186 MHz  
 WDW EM  
 SSB 0  
 LB 1.00 Hz  
 GB 0  
 PC 1.40

160.17  
 154.84  
 150.70  
 140.74  
 140.15  
 137.91  
 137.13  
 128.72  
 128.06  
 127.21  
 126.99  
 114.32

68.21  
 56.22  
 45.00  
 43.96  
 24.96  
 23.13  
 11.15  
 10.90

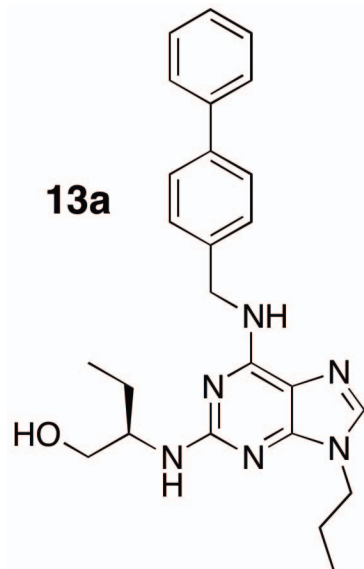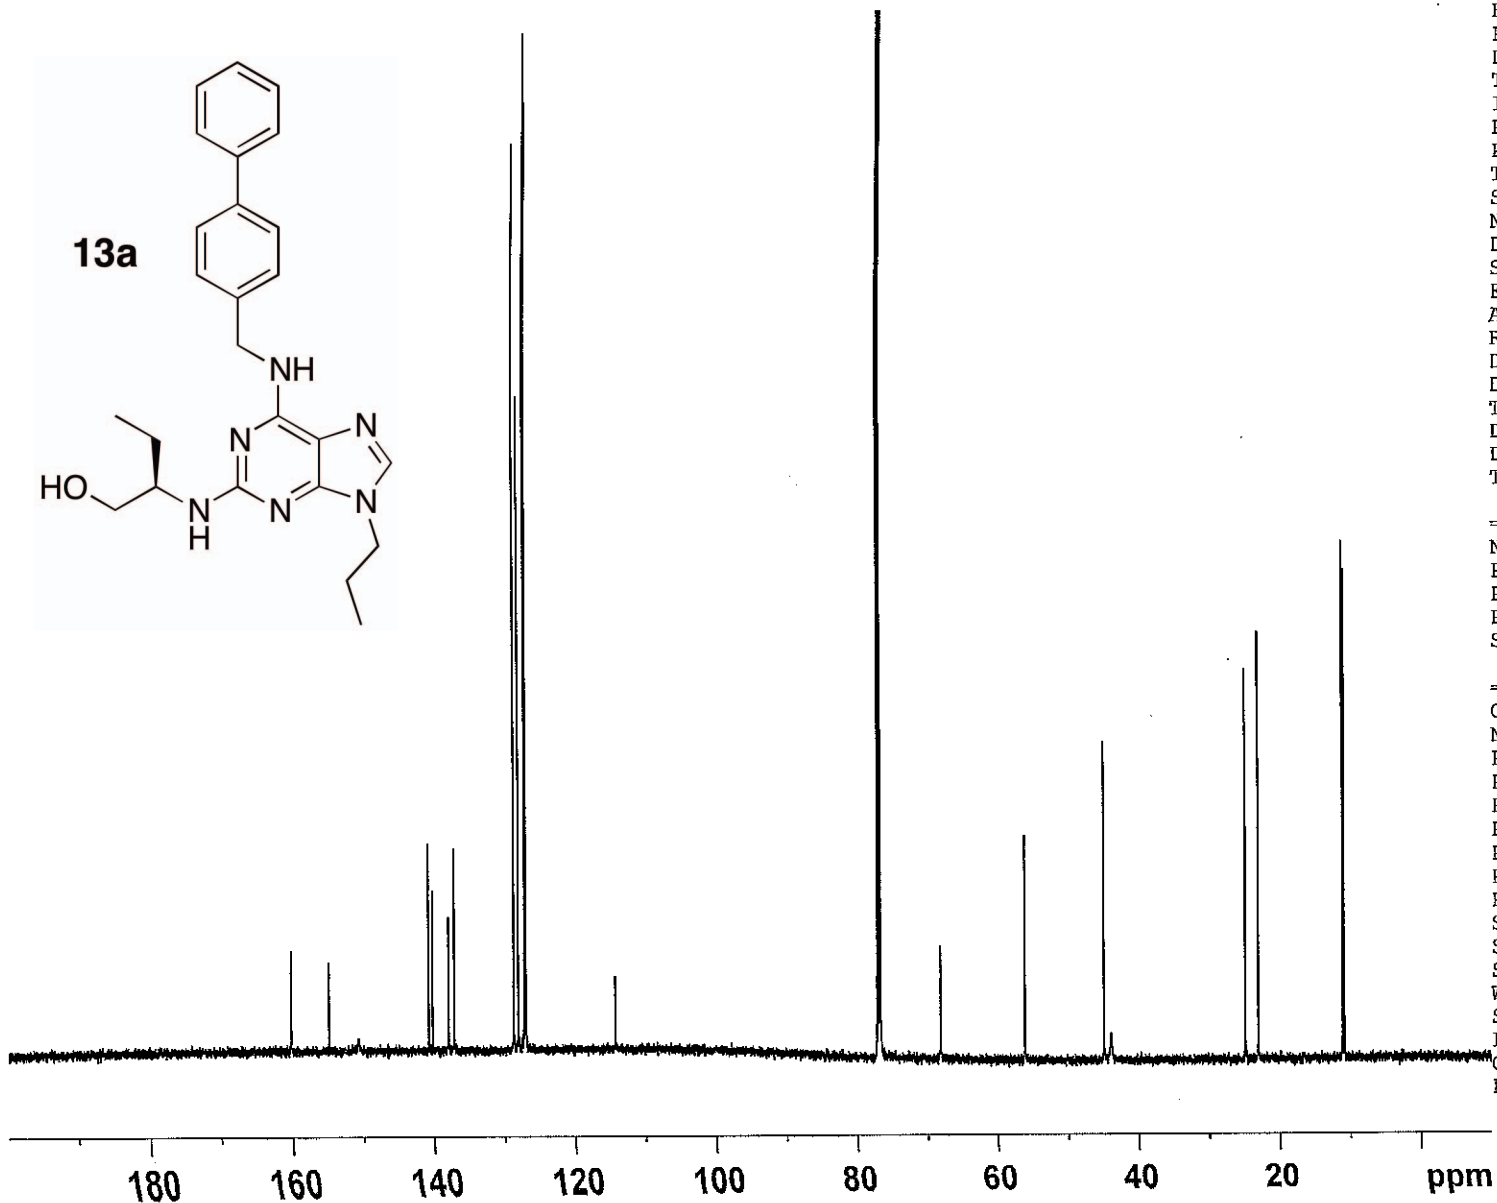

kb-NB-213-01

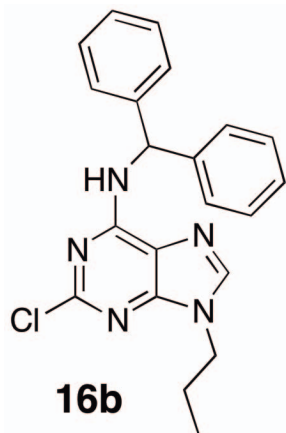

7.542  
7.268  
7.180  
6.794  
6.784

3.999

1.823  
1.812  
0.916  
0.905  
0.894

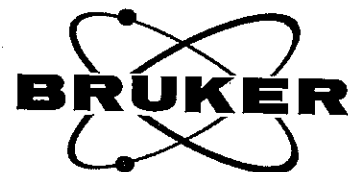

NAME kb-NB-213-01  
EXPNO 1  
PROCNO 1  
Date\_ 20090721  
Time\_ 10.28  
INSTRUM spect  
PROBHD 5 mm CPTCI 1H-  
PULPROG zg30  
TD 65536  
SOLVENT CDCl3  
NS 16  
DS 2  
SWH 12376.237 Hz  
FIDRES 0.188846 Hz  
AQ 2.6477449 sec  
RG 14.3  
DW 40.400 usec  
DE 6.50 usec  
TE 298.0 K  
D1 1.00000000 sec  
TD0 1

===== CHANNEL f1 =====  
NUC1 1H  
P1 8.00 usec  
PL1 4.00 dB  
PL1W 7.00000000 W  
SFO1 600.1337060 MHz  
SI 32768  
SF 600.1300040 MHz  
WDW EM  
SSB 0  
LB 0.30 Hz  
GB 0  
PC 1.00

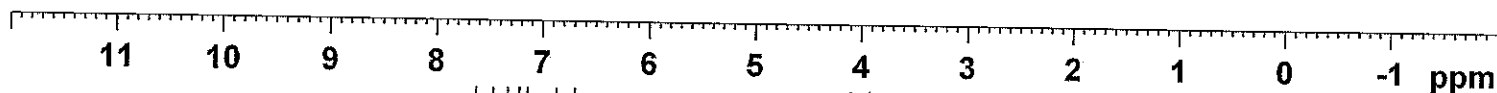

0.88  
9.46  
0.98  
0.88

2.01

2.00

3.02

kb-NB-213-01

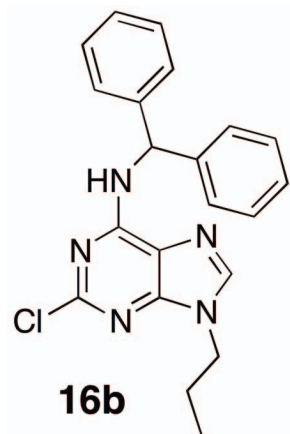

154.35  
154.24  
150.33

141.32  
140.36

127.65  
127.46  
127.32

118.47

57.12

45.36

23.16

10.99

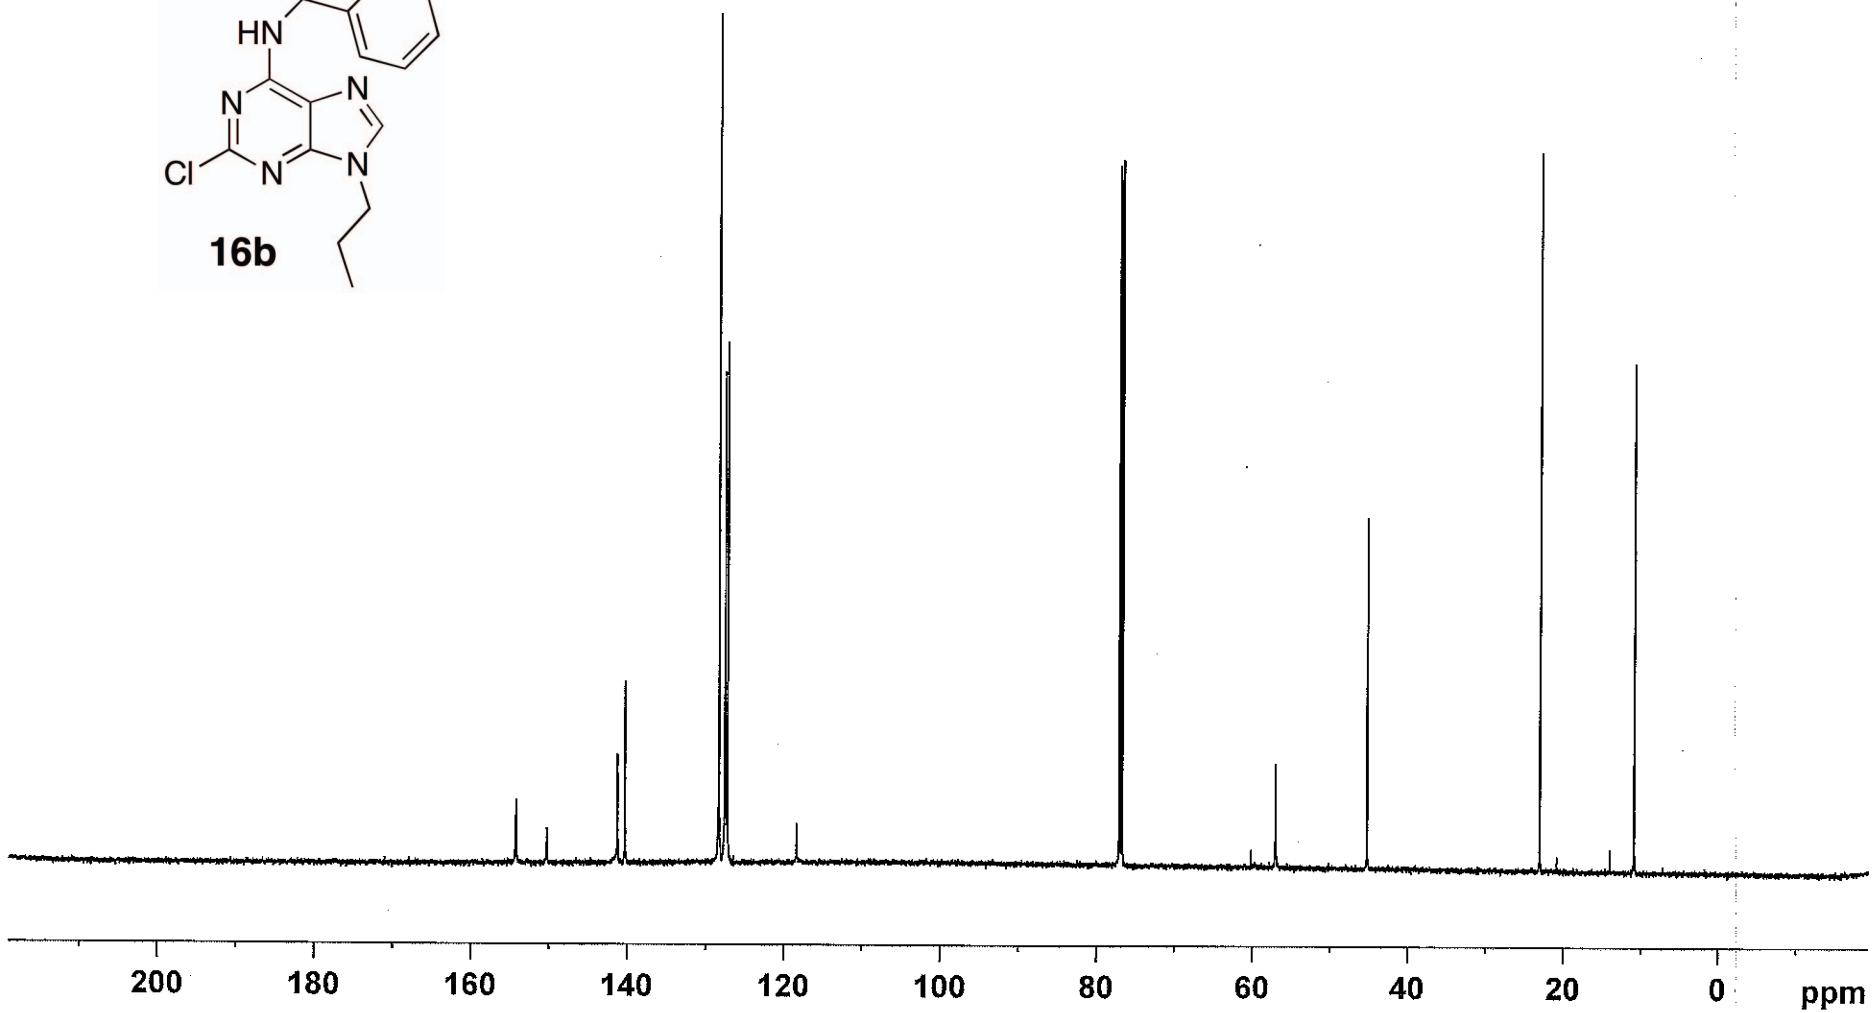



kb-NB-213-03

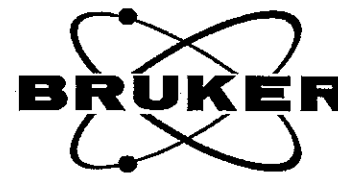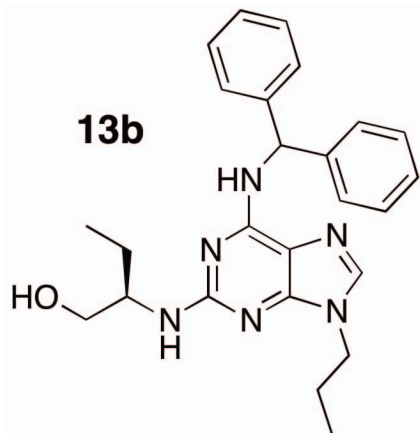

7.316  
7.296  
7.284  
7.262  
7.250  
7.240  
6.494  
6.461  
4.823  
4.816  
3.920  
3.909  
3.897  
3.749  
3.694  
3.681  
3.513  
3.484  
1.833  
1.821  
1.810  
1.798  
1.561  
1.550  
1.539  
1.528  
1.485  
1.474  
1.463  
1.452  
0.947  
0.935  
0.929

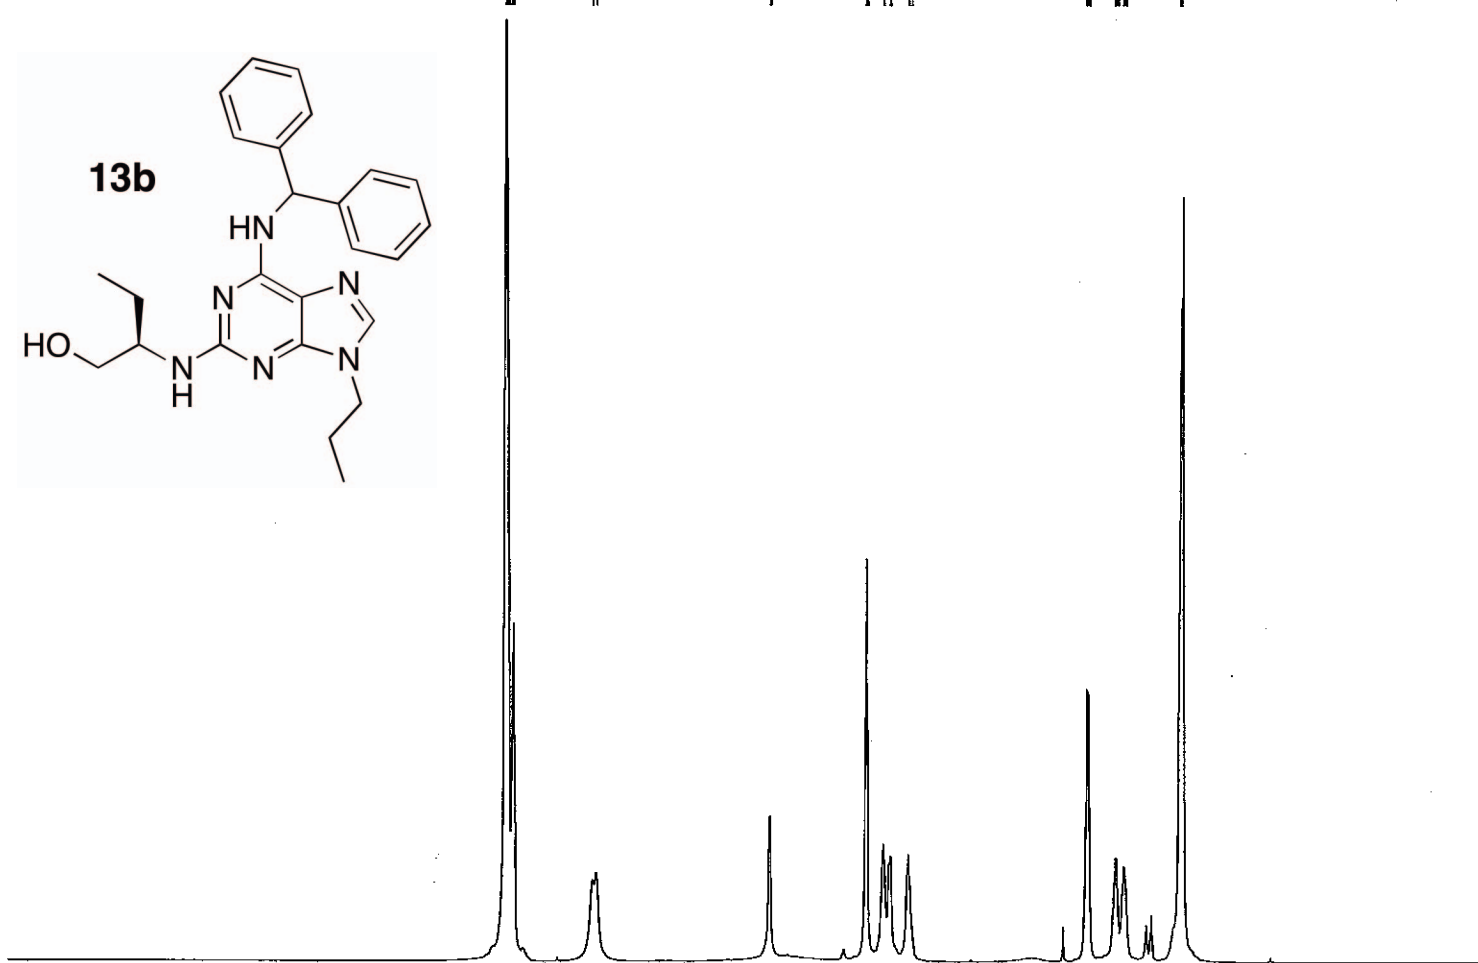

11 10 9 8 7 6 5 4 3 2 1 0 -1 ppm

10.63  
1.72  
1.08  
1.93  
1.99  
1.06  
1.92  
2.01  
6.00

NAME kb-NB-213-03  
EXPNO 1  
PROCNO 1  
Date\_ 20090723  
Time 10.44  
INSTRUM spect  
PROBHD 5 mm CP13 1H-  
PULPROG zg30  
TD 65536  
SOLVENT CDCl3  
NS 16  
DS 2  
SWH 12376.237 Hz  
FIDRES 0.188846 Hz  
AQ 2.6477449 sec  
RG 28.5  
DW 40.400 usec  
DE 6.50 usec  
TE 298.0 K  
D1 1.00000000 sec  
TD0 1

===== CHANNEL f1 =====  
NUC1 1H  
P1 8.00 usec  
PL1 4.00 dB  
PL1W 7.00000000 W  
SFO1 600.1337060 MHz  
SI 32768  
SF 600.1300089 MHz  
WDW EM  
SSB 0  
LB 0.30 Hz  
GB 0  
PC 1.00

kb-NB-213-03

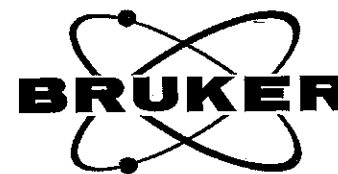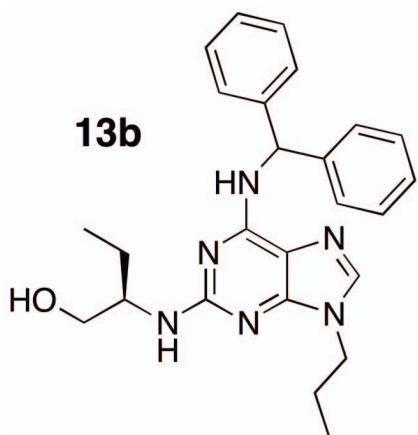

— 160.01  
 — 153.88  
 — 150.76  
 — 142.15  
 — 137.15  
 — 128.48  
 — 128.45  
 — 127.57  
 — 127.23  
 — 127.18  
 — 114.27

— 67.62  
 — 57.85  
 — 55.95  
 — 45.00  
 — 24.83  
 — 23.12  
 — 11.16  
 — 10.83

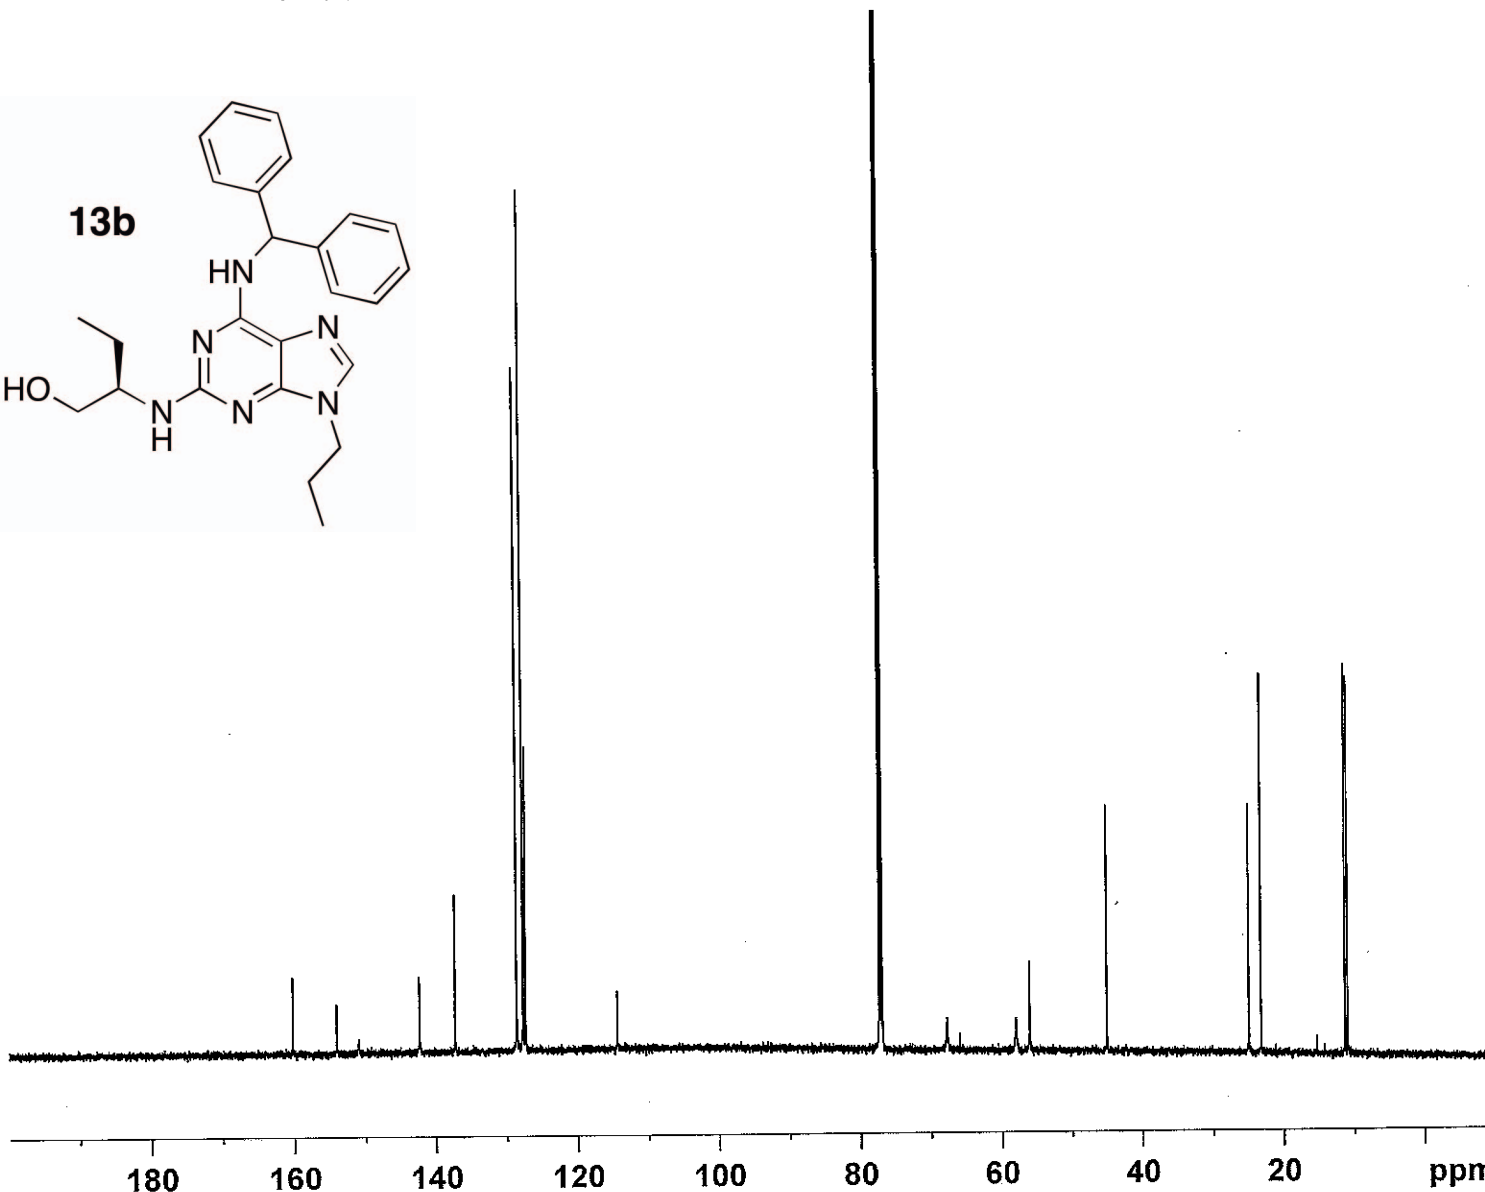

NAME kb-NB-213-03  
 EXPNO 2  
 PROCNO 1  
 Date\_ 20090723  
 Time\_ 10.59  
 INSTRUM spect  
 PROBHD 5 mm CPTCI 1H-  
 PULPROG zgpg30  
 TD 65536  
 SOLVENT CDC13  
 NS 256  
 DS 4  
 SWH 35971.223 Hz  
 FIDRES 0.548877 Hz  
 AQ 0.9110143 sec  
 RG 11585.2  
 DW 13.900 usec  
 DE 6.50 usec  
 TE 298.0 K  
 D1 2.00000000 sec  
 D11 0.03000000 sec  
 TDO 1

==== CHANNEL f1 =====  
 NUC1 13C  
 P1 12.00 usec  
 PL1 -0.70 dB  
 PL1W 82.63385773 W  
 SFO1 150.9178988 MHz

==== CHANNEL f2 =====  
 CPDPRG2 waltz16  
 NUC2 1H  
 PCPD2 80.00 usec  
 PL2 4.00 dB  
 PL12 24.00 dB  
 PL13 27.00 dB  
 PL2W 7.00000000 W  
 PL12W 0.07000000 W  
 PL13W 0.03508311 W  
 SFO2 600.1324005 MHz  
 SI 32768  
 SF 150.9028175 MHz  
 WDW EM  
 SSB 0  
 LB 1.00 Hz  
 GB 0  
 PC 1.40

kb-NB-213-04

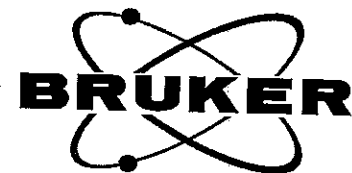

NAME kb-NB-213-04  
EXPNO 2  
PROCNO 1  
Date\_ 20090722  
Time 9.19  
INSTRUM spect  
PROBHD 5 mm CPTCI 1H-  
PULPROG zg30  
TD 65536  
SOLVENT CDCl3  
NS 16  
DS 2  
SWH 12376.237 Hz  
FIDRES 0.188846 Hz  
AQ 2.6477449 sec  
RG 10.1  
DW 40.400 usec  
DE 6.50 usec  
TE 298.0 K  
D1 1.00000000 sec  
TDO 1

===== CHANNEL f1 =====  
NUC1 1H  
P1 8.00 usec  
PL1 4.00 dB  
PL1W 7.0000000 W  
SFO1 600.1337060 MHz  
SI 32768  
SF 600.1300044 MHz  
WDW EM  
SSB 0  
LB 0.30 Hz  
GB 0  
PC 1.00

7.737  
7.365  
7.270  
7.240  
7.229  
7.218  
7.165  
7.153  
6.852

4.245  
4.055  
3.821

2.933

1.866  
1.856

0.927

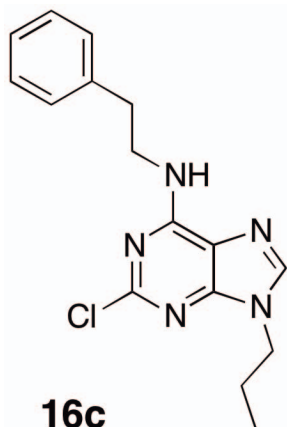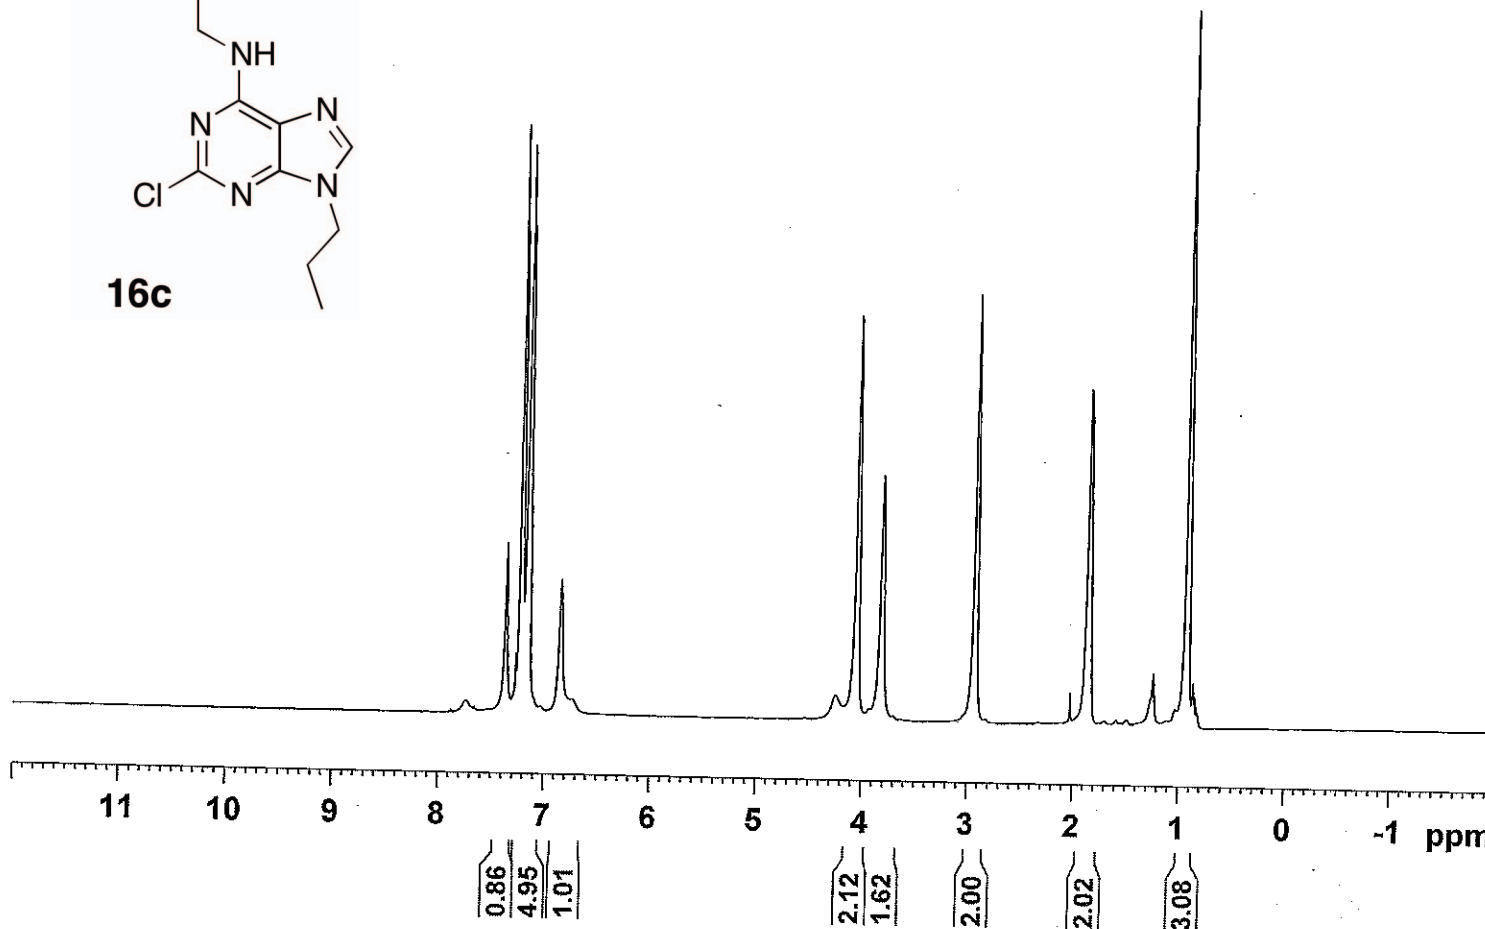

kb-NB-213-04

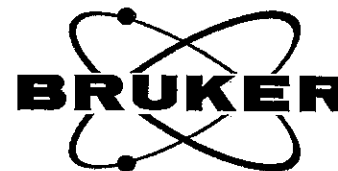

NAME kb-NB-213-04  
EXPNO 3  
PROCNO 1  
Date 20090722  
Time 9.35  
INSTRUM spect  
PROBHD 5 mm CPTCI 1H-  
PULPROG zgpg30  
TD 65536  
SOLVENT CDC13  
NS 256  
DS 4  
SWH 35971.223 Hz  
FIDRES 0.548877 Hz  
AQ 0.9110143 sec  
RG 13004  
DW 13.900 usec  
DE 6.50 usec  
TE 298.0 K  
D1 2.00000000 sec  
D11 0.03000000 sec  
TD0 1

===== CHANNEL f1 =====  
NUC1 13C  
P1 12.00 usec  
PL1 -0.70 dB  
PL1W 82.63385773 W  
SFO1 150.9178988 MHz

===== CHANNEL f2 =====  
CPDPRG2 waltz16  
NUC2 1H  
PCPD2 80.00 usec  
PL2 4.00 dB  
PL12 24.00 dB  
PL13 27.00 dB  
PL2W 7.00000000 W  
PL12W 0.07000000 W  
PL13W 0.03508311 W  
SFO2 600.1324005 MHz  
SI 32768  
SF 150.9028351 MHz  
WDW EM  
SSB 0  
LB 1.00 Hz  
GB 0  
PC 1.40

155.05  
154.35  
149.89

139.82  
138.80

128.69  
128.35  
126.21  
118.50

45.27  
41.84  
35.40

23.18

10.97

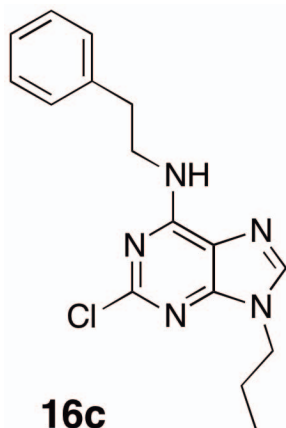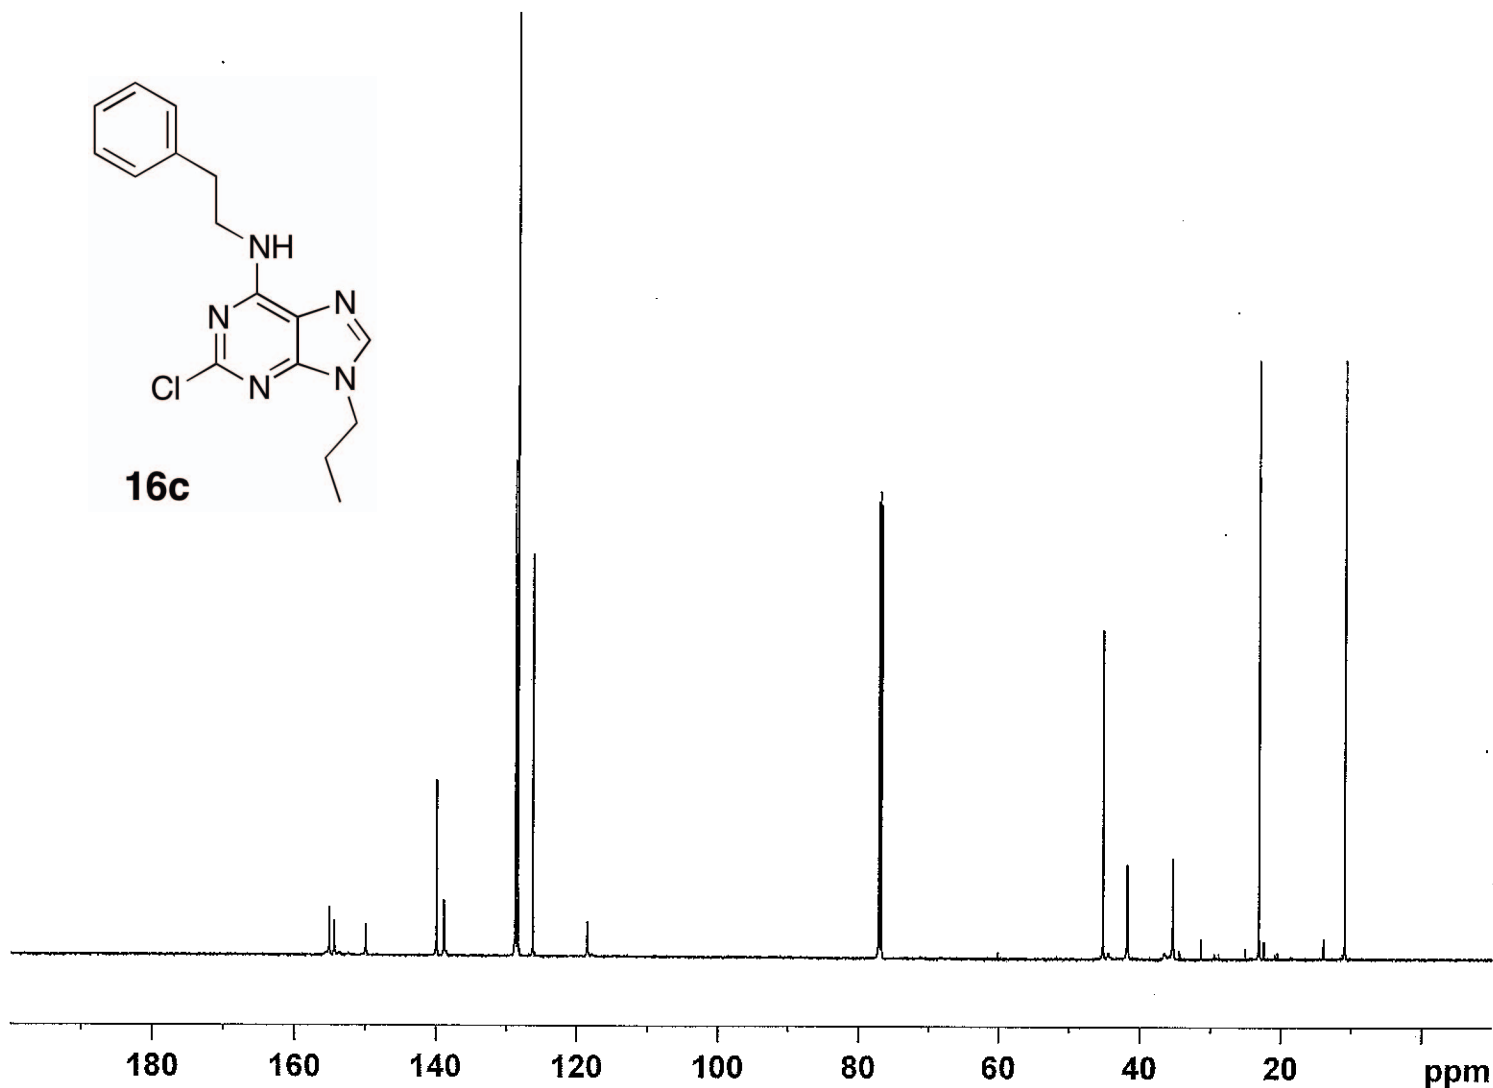

kb-NB-213-07

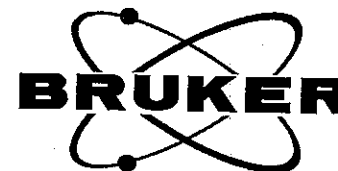

NAME kb-NB-213-07  
 EXPNO 1  
 PROCNO 1  
 Date\_ 20090724  
 Time 15.29  
 INSTRUM spect  
 PROBHD 5 mm CPTCI 1H-  
 PULPROG zg30  
 TD 65536  
 SOLVENT CDC13  
 NS 16  
 DS 2  
 SWH 12376.237 Hz  
 FIDRES 0.188846 Hz  
 AQ 2.6477449 sec  
 RG 57  
 DW 40.400 usec  
 DE 6.50 usec  
 TE 298.0 K  
 D1 1.00000000 sec  
 TD0 1

===== CHANNEL f1 =====  
 NUC1 1H  
 P1 8.00 usec  
 PL1 4.00 dB  
 PLLW 7.00000000 W  
 SFO1 600.1337060 MHz  
 SI 32768  
 SF 600.1299778 MHz  
 WDW EM  
 SSB 0  
 LB 0.30 Hz  
 GB 0  
 PC 1.00

7.436  
 7.362  
 7.351  
 7.340  
 7.313  
 7.301  
 7.290  
 7.268  
 5.805  
 5.401  
 4.946  
 4.009  
 3.998  
 3.987  
 3.953  
 3.899  
 3.882  
 3.710  
 3.696  
 3.680  
 3.010  
 2.999  
 1.912  
 1.900  
 1.888  
 1.877  
 1.706  
 1.695  
 1.684  
 1.673  
 1.645  
 1.633  
 1.622  
 1.611  
 1.098  
 1.087  
 1.079

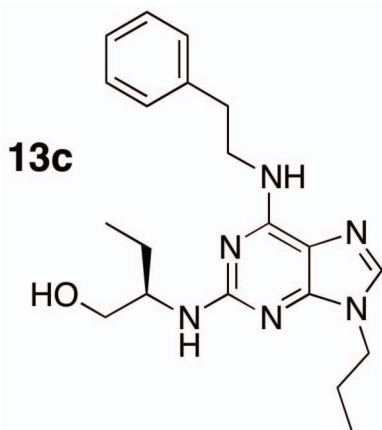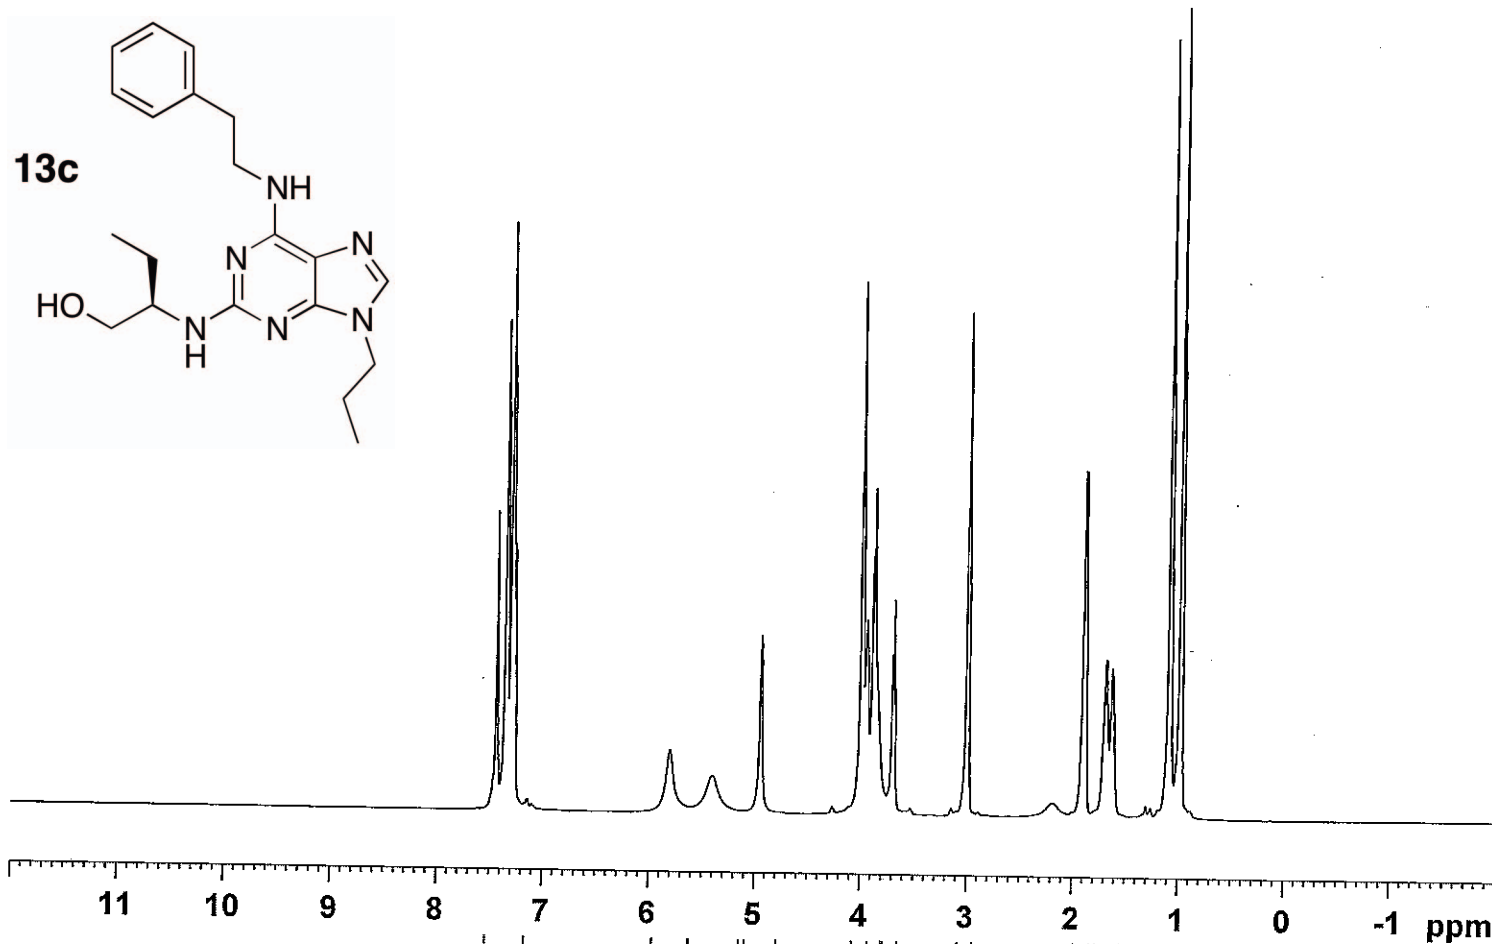

6.00  
 0.91  
 0.90  
 1.00  
 3.12  
 2.46  
 1.13  
 1.89  
 1.94  
 2.06  
 3.01  
 2.96

kb-NB-213-07

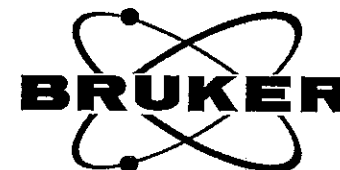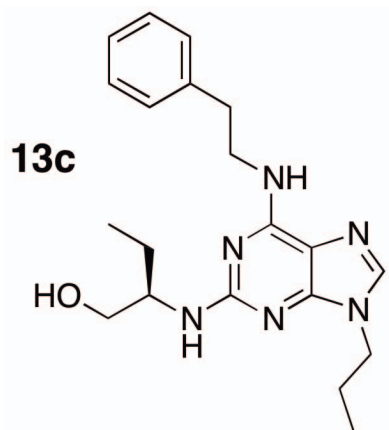

— 160.20  
— 154.91  
— 138.99  
— 137.04  
— 128.78  
— 128.57  
— 126.40  
— 114.40  
— 68.57  
— 56.39  
— 45.02  
— 41.71  
— 35.94  
— 25.04  
— 23.18  
— 11.18  
— 10.94

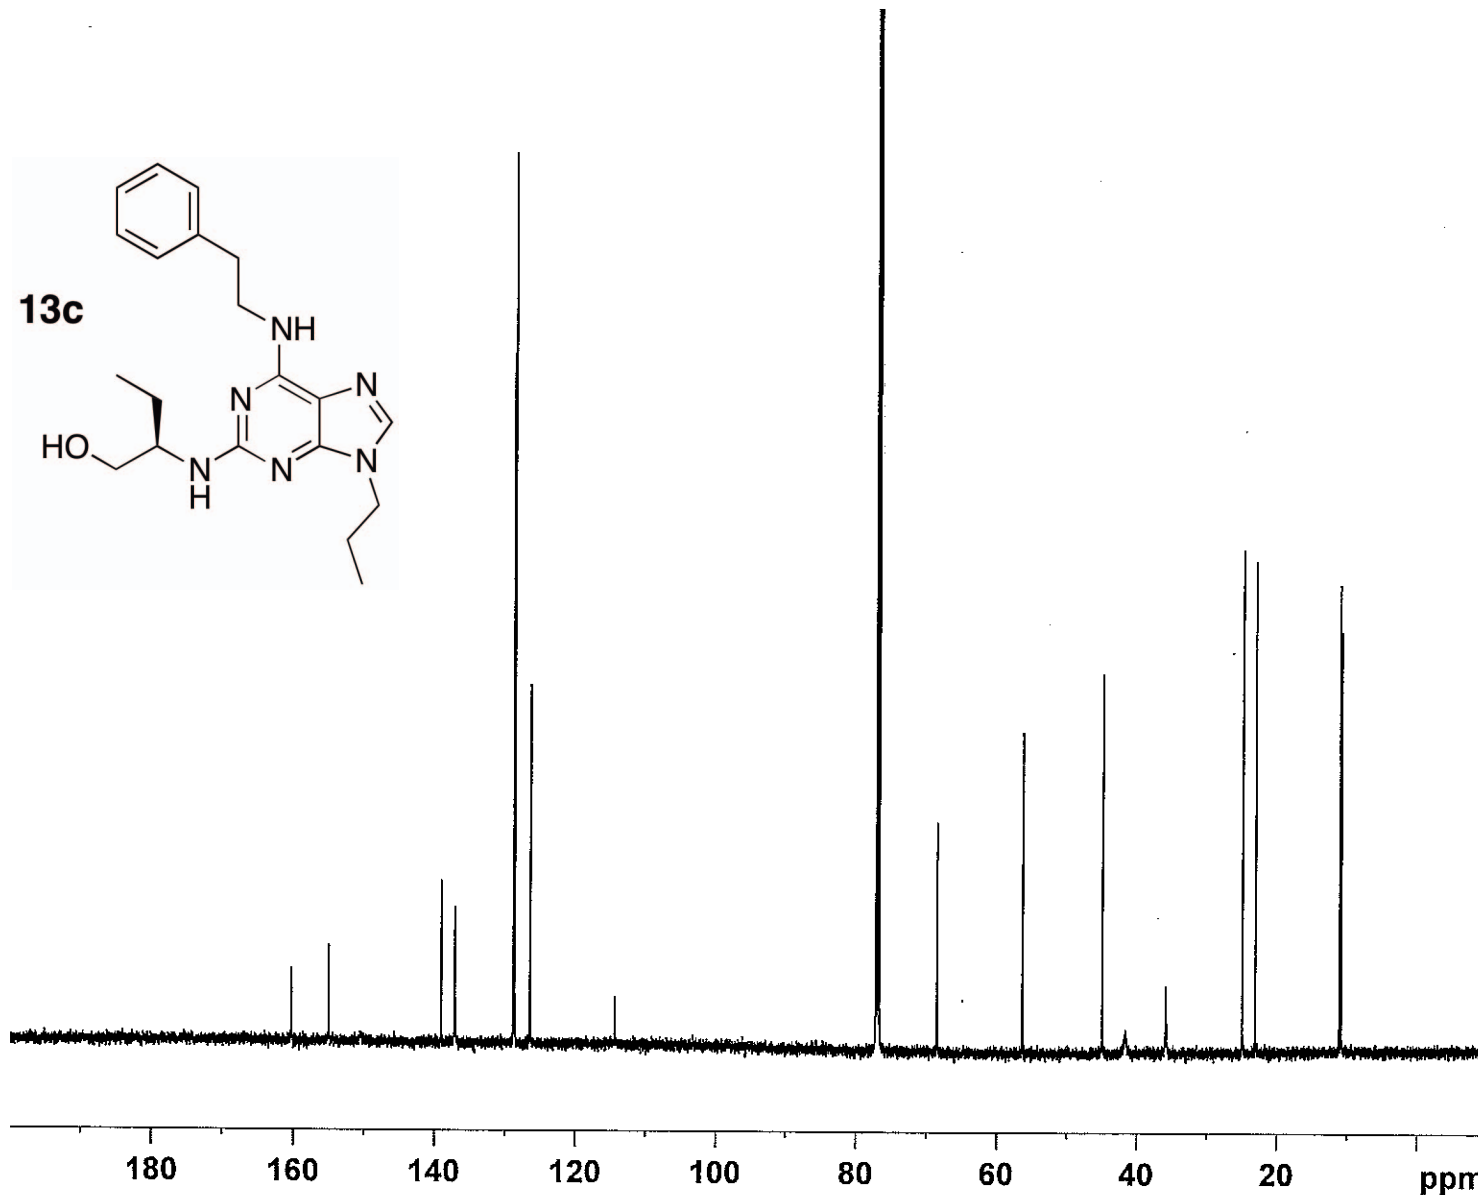

NAME kb-NB-213-07  
EXPNO 2  
PROCNO 1  
Date 20090724  
Time 15.48  
INSTRUM spect  
PROBHD 5 mm CPTCI 1H-  
PULPROG zgpg30  
TD 65536  
SOLVENT CDCl3  
NS 320  
DS 2  
SWH 35971.223 Hz  
FIDRES 0.548877 Hz  
AQ 0.9110143 sec  
RG 13004  
DW 13.900 usec  
DE 6.50 usec  
TE 298.0 K  
D1 2.0000000 sec  
D11 0.0300000 sec  
TD0 1

==== CHANNEL f1 =====  
NUC1 13C  
P1 12.00 usec  
PL1 -0.70 dB  
PL1W 82.63385773 W  
SFO1 150.9178988 MHz

==== CHANNEL f2 =====  
CPDPRG2 waltz16  
NUC2 1H  
PCPD2 80.00 usec  
PL2 4.00 dB  
PL12 24.00 dB  
PL13 27.00 dB  
PL2W 7.00000000 W  
PL12W 0.07000000 W  
PL13W 0.03508311 W  
SFO2 600.1324005 MHz  
SI 32768  
SF 150.9028151 MHz  
WDW EM  
SSB 0  
LB 1.00 Hz  
GB 0  
PC 1.40

kb-NB-213-05

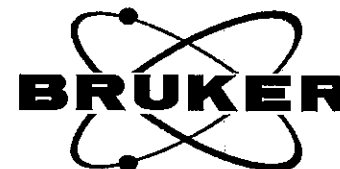

NAME kb-NB-213-05  
EXPNO 1  
PROCNO 1  
Date\_ 20090722  
Time\_ 9.42  
INSTRUM spect  
PROBHD 5 mm CPTCI 1H-  
PULPROG zg30  
TD 65536  
SOLVENT CDCl3  
NS 16  
DS 2  
SWH 12376.237 Hz  
FIDRES 0.188846 Hz  
AQ 2.6477449 sec  
RG 35.9  
DW 40.400 usec  
DE 6.50 usec  
TE 298.0 K  
D1 1.00000000 sec  
TD0 1

===== CHANNEL f1 =====  
NUC1 1H  
P1 8.00 usec  
PL1 4.00 dB  
PL1W 7.00000000 W  
SFO1 600.1337060 MHz  
SI 32768  
SF 600.1300038 MHz  
WDW EM  
SSB 0  
LB 0.30 Hz  
GB 0  
PC 1.00

7.341  
7.321  
7.308  
7.295  
7.283  
7.271  
6.986  
— 4.821  
— 4.058  
1.866  
1.863  
0.945  
0.933  
0.923

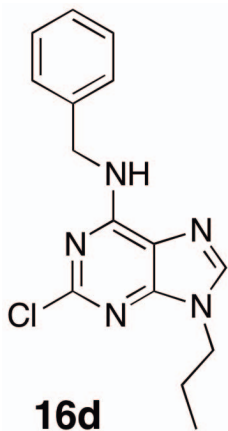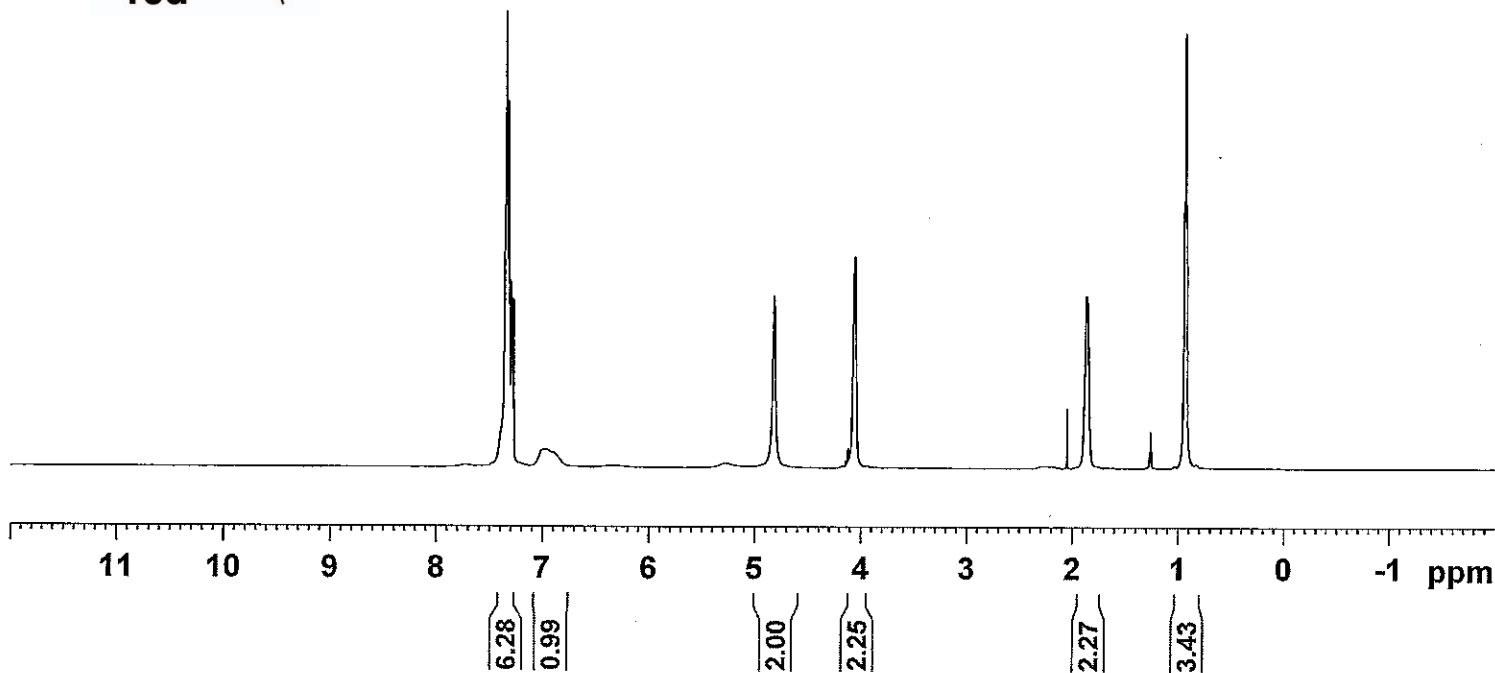

kb-NB-213-05

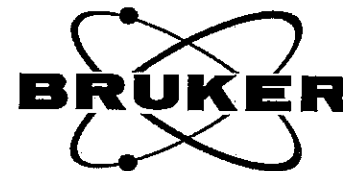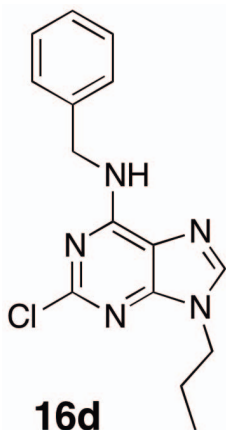

155.09  
154.46  
150.20  
140.17  
138.01  
128.61  
127.90  
127.54  
118.56

45.43  
44.57

23.25

11.06

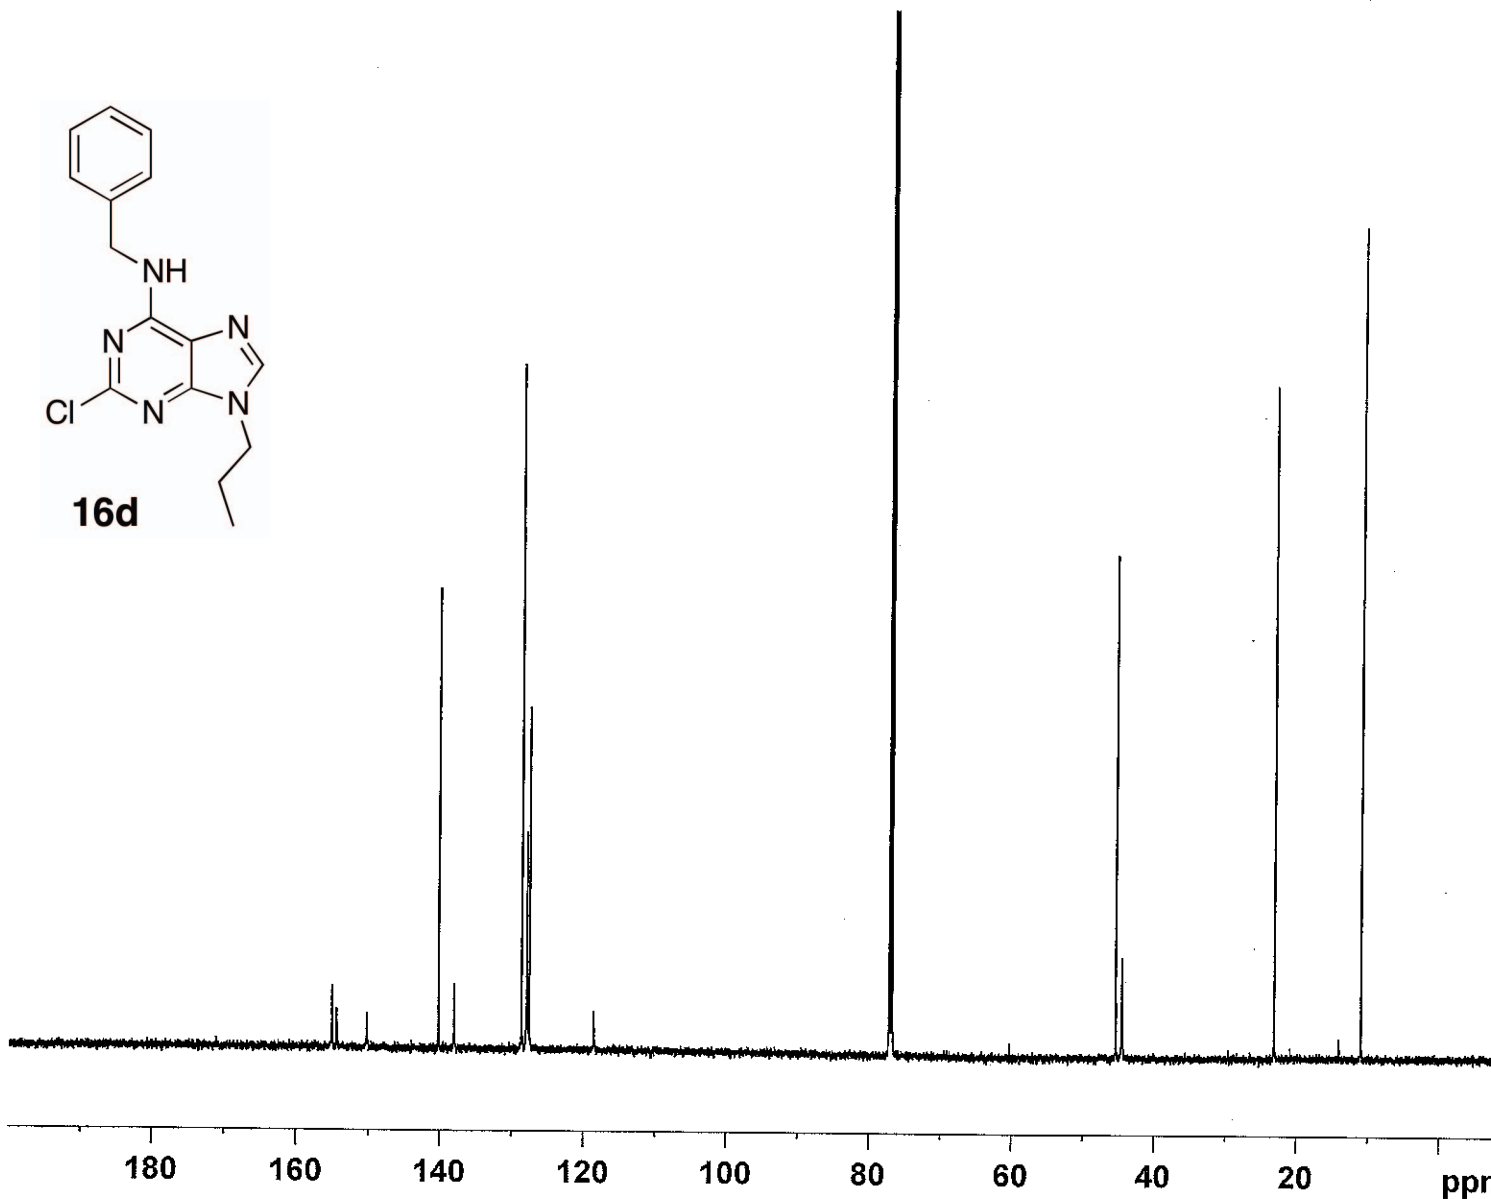

NAME kb-NB-213-05  
EXPNO 2  
PROCNO 1  
Date\_ 20090722  
Time\_ 9.58  
INSTRUM spect  
PROBHD 5 mm CPTCI 1H-  
PULPROG zgpg30  
TD 65536  
SOLVENT CDCl3  
NS 256  
DS 4  
SWH 35971.223 Hz  
FIDRES 0.548877 Hz  
AQ 0.9110143 sec  
RG 16384  
DW 13.900 usec  
DE 6.50 usec  
TE 298.0 K  
D1 2.0000000 sec  
D11 0.0300000 sec  
TD0 1

==== CHANNEL f1 =====  
NUC1 13C  
P1 12.00 usec  
PL1 -0.70 dB  
PL1W 82.63385773 W  
SFO1 150.9178988 MHz

==== CHANNEL f2 =====  
CPDPRG2 waltz16  
NUC2 1H  
PCPD2 80.00 usec  
PL2 4.00 dB  
PL12 24.00 dB  
PL13 27.00 dB  
PL2W 7.00000000 W  
PL12W 0.07000000 W  
PL13W 0.03508311 W  
SFO2 600.1324005 MHz  
SI 32768  
SF 150.9028182 MHz  
WDW EM  
SSB 0  
LB 1.00 Hz  
GB 0  
PC 1.40



kb-NB-213-08

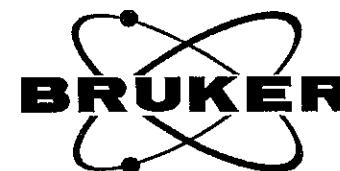

NAME kb-NB-213-08  
EXPNO 1  
PROCNO 1  
Date 20090724  
Time 10.32  
INSTRUM spect  
PROBHD 5 mm CPTCI 1H-  
PULPROG zg30  
TD 65536  
SOLVENT CDC13  
NS 16  
DS 2  
SWH 12376.237 Hz  
FIDRES 0.188846 Hz  
AQ 2.6477449 sec  
RG 45.3  
DW 40.400 usec  
DE 6.50 usec  
TE 298.0 K  
D1 1.00000000 sec  
TD0 1

===== CHANNEL f1 =====  
NUC1 1H  
P1 8.00 usec  
PL1 4.00 dB  
PL1W 7.00000000 W  
SFO1 600.1337060 MHz  
SI 32768  
SF 600.1300049 MHz  
WDW EM  
SSB 0  
LB 0.30 Hz  
GB 0  
PC 1.00

7.350  
7.332  
7.319  
7.270  
6.215  
5.189  
5.164  
5.149  
4.919  
4.764  
4.731  
3.945  
3.887  
3.819  
3.801  
3.638  
3.622  
3.609  
1.848  
1.837  
1.634  
1.623  
1.612  
1.571  
1.560  
1.548  
1.538  
1.026  
1.015  
0.946  
0.936

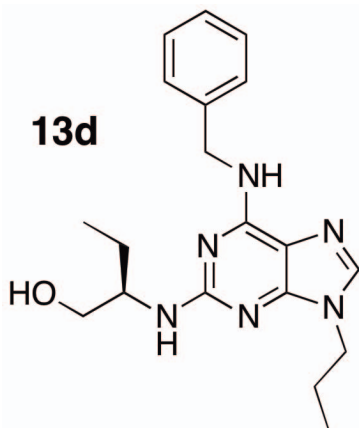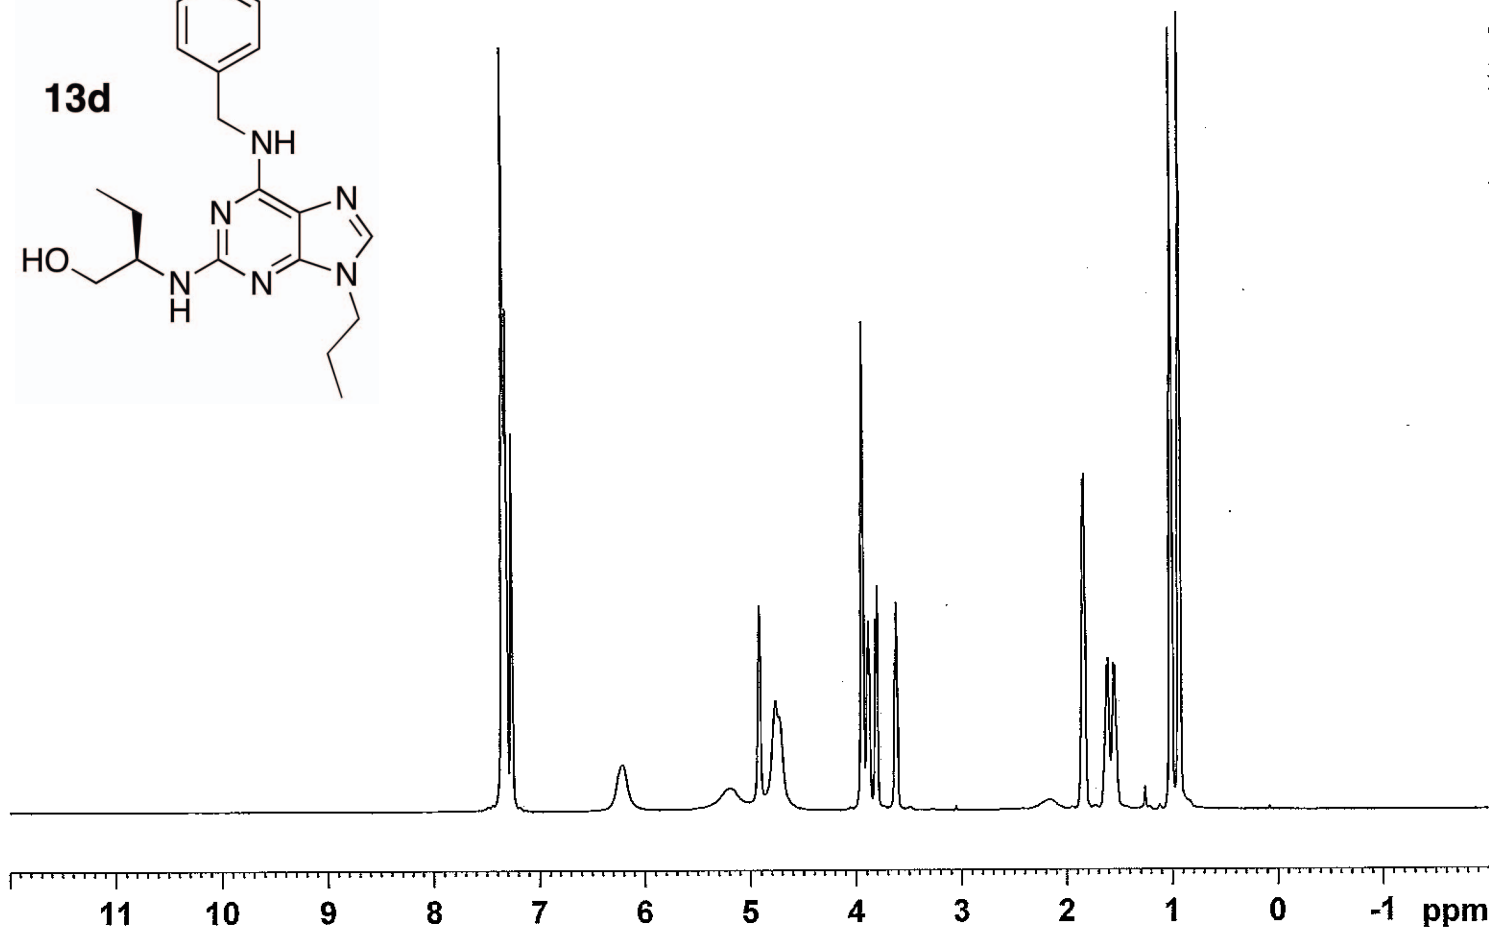

4.84  
1.27  
0.92  
0.89  
1.11  
2.00  
2.05  
1.05  
1.02  
1.01  
2.04  
2.10  
3.04  
3.19

kb-NB-213-08

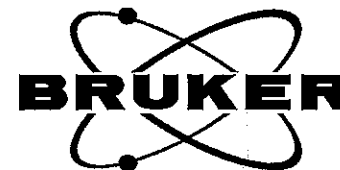

NAME kb-NB-213-08  
EXPNO 2  
PROCNO 1  
Date 20090724  
Time 10.48  
INSTRUM spect  
PROBHD 5 mm CPTCI 1H-  
PULPROG zgpg30  
TD 65536  
SOLVENT CDCl3  
NS 256  
DS 2  
SWH 35971.223 Hz  
FIDRES 0.548877 Hz  
AQ 0.9110143 sec  
RG 11585.2  
DW 13.900 usec  
DE 6.50 usec  
TE 298.0 K  
D1 2.00000000 sec  
D11 0.03000000 sec  
TDO 1

===== CHANNEL f1 =====  
NUC1 13C  
P1 12.00 usec  
PL1 -0.70 dB  
PL1W 82.63385773 W  
SFO1 150.9178988 MHz

===== CHANNEL f2 =====  
CPDPRG2 waltz16  
NUC2 1H  
PCPD2 80.00 usec  
PL2 4.00 dB  
PL12 24.00 dB  
PL13 27.00 dB  
PL2W 7.00000000 W  
PL12W 0.07000000 W  
PL13W 0.03508311 W  
SFO2 600.1324005 MHz  
SI 32768  
SF 150.9028153 MHz  
WDW EM  
SSB 0  
LB 1.00 Hz  
GB 0  
PC 1.40

160.19  
154.83

138.74  
137.13  
128.53  
127.68  
127.28

114.34

68.40

56.28

45.04  
44.35

24.99  
23.15

11.18  
10.90

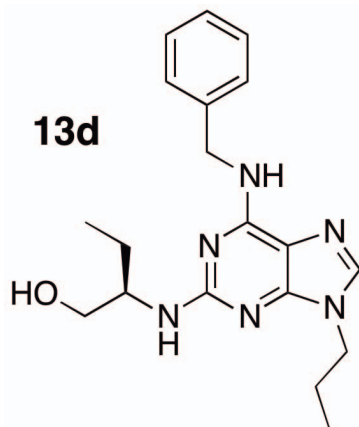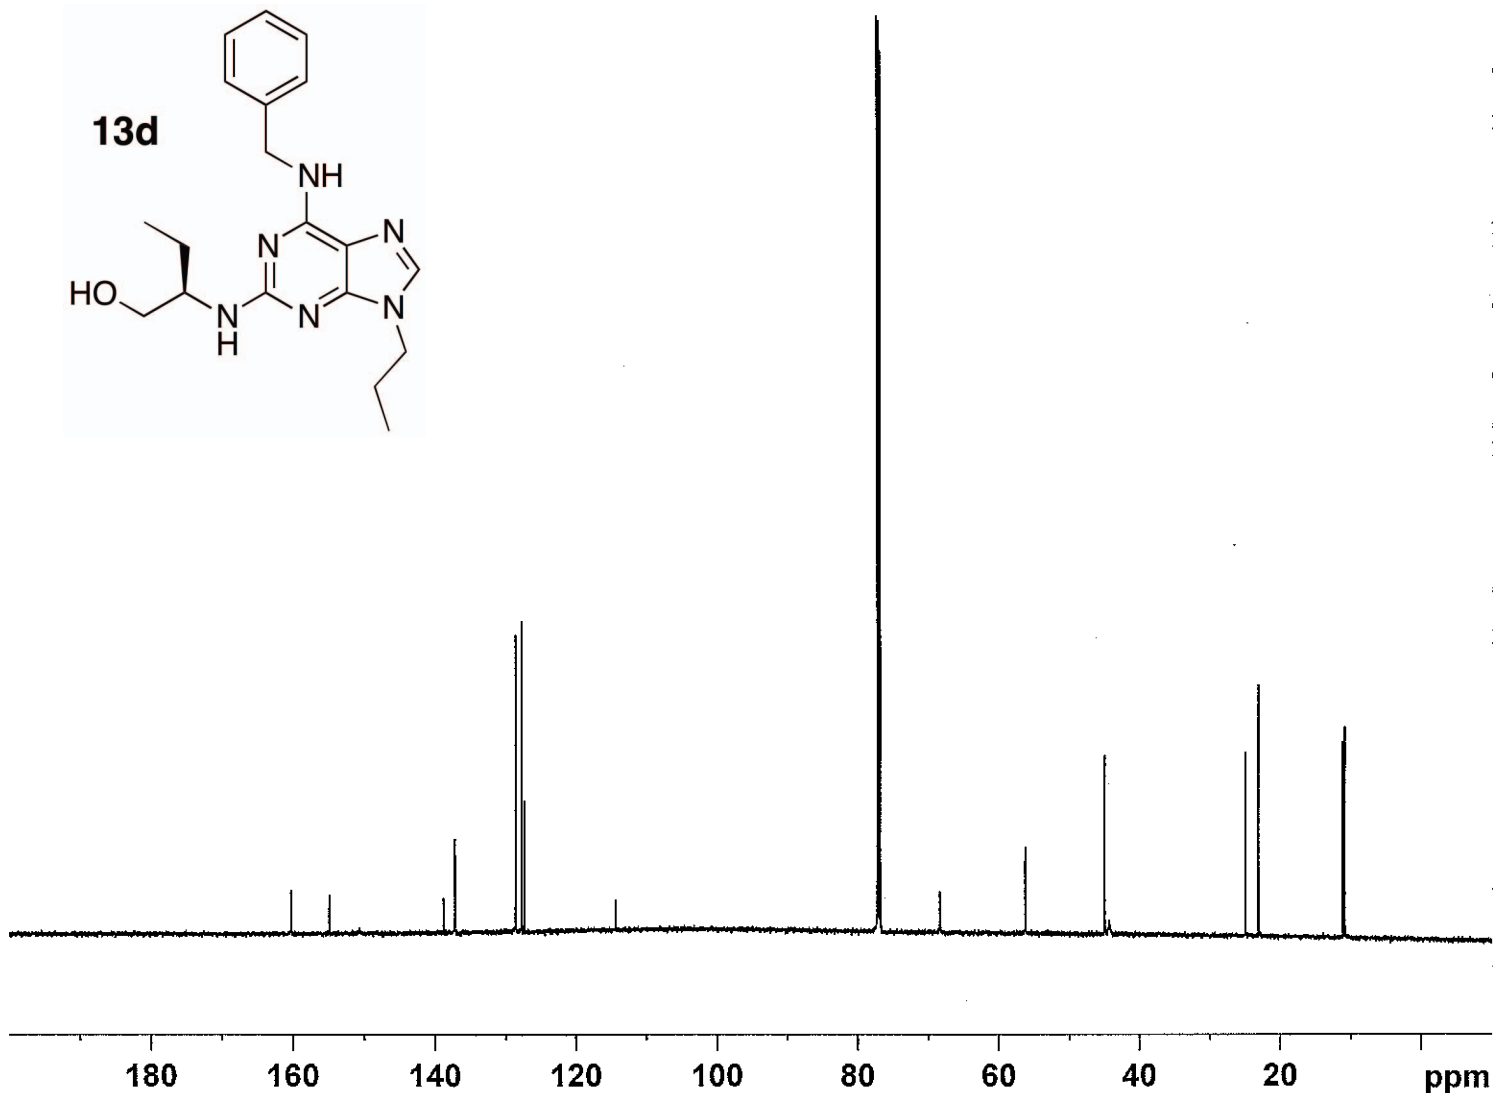

kb-NB-213-11

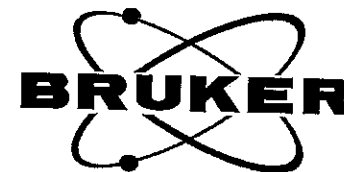

NAME kb-NB-213-11  
EXPNO 1  
PROCNO 1  
Date\_ 20090728  
Time\_ 13.51  
INSTRUM spect  
PROBHD 5 mm CPTCI 1H-  
PULPROG zg30  
TD 65536  
SOLVENT CDC13  
NS 16  
DS 2  
SWH 12376.237 Hz  
FIDRES 0.188846 Hz  
AQ 2.6477449 sec  
RG 18  
DW 40.400 usec  
DE 6.50 usec  
TE 298.0 K  
D1 1.00000000 sec  
TDO 1

===== CHANNEL f1 =====  
NUC1 1H  
P1 8.00 usec  
PL1 4.00 dB  
PL1W 7.00000000 W  
SFO1 600.1337060 MHz  
SI 32768  
SF 600.1300045 MHz  
WDW EM  
SSB 0  
LB 0.30 Hz  
GB 0  
PC 1.00

8.307  
7.745  
7.732  
7.373  
7.362  
7.349  
7.127  
7.116  
7.104

4.124  
4.113  
4.101

1.909  
1.898  
1.886  
1.874  
0.954  
0.943  
0.931

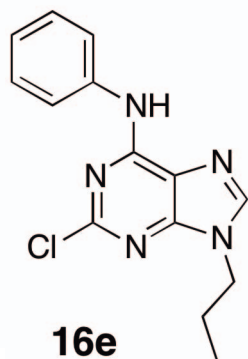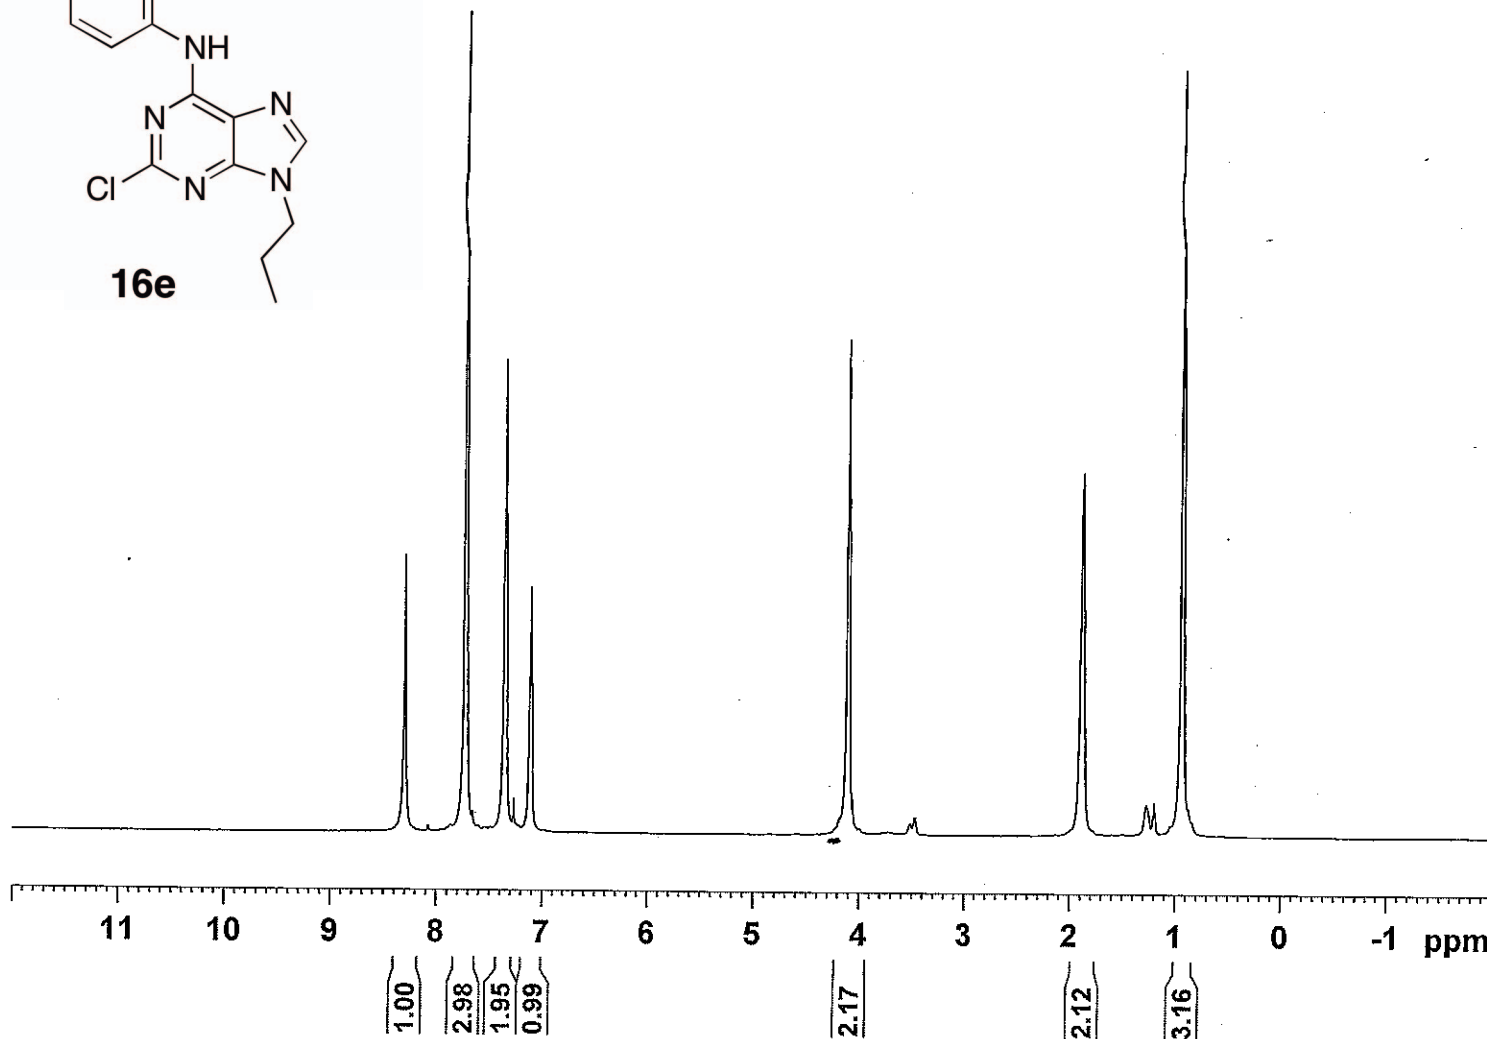

kb-NB-213-11

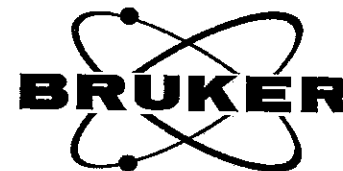

NAME kb-NB-213-11  
EXPNO 2  
PROCNO 1  
Date\_ 20090728  
Time 14.04  
INSTRUM spect  
PROBHD 5 mm CPTCI 1H-  
PULPROG zgpg30  
TD 65536  
SOLVENT CDC13  
NS 192  
DS 4  
SWH 35971.223 Hz  
FIDRES 0.548877 Hz  
AQ 0.19110143 sec  
RG 16384  
DW 13.900 usec  
DE 6.50 usec  
TE 298.0 K  
D1 2.00000000 sec  
D11 0.03000000 sec  
TD0 1

==== CHANNEL f1 =====  
NUC1 13C  
P1 12.00 usec  
PL1 -0.70 dB  
PL1W 82.63385773 W  
SFO1 150.9178988 MHz

==== CHANNEL f2 =====  
CPDPRG2 waltz16  
NUC2 1H  
PCPD2 80.00 usec  
PL2 4.00 dB  
PL12 24.00 dB  
PL13 27.00 dB  
PL2W 7.00000000 W  
PL12W 0.07000000 W  
PL13W 0.03508311 W  
SFO2 600.1324005 MHz  
SI 32768  
SF 150.9028285 MHz  
WDW EM  
SSB 0  
LB 1.00 Hz  
GB 0  
PC 1.40

153.86  
152.27  
150.66

140.95  
137.98

128.93  
123.89  
120.30  
119.14

45.51

23.22

11.00

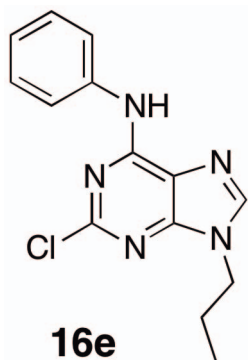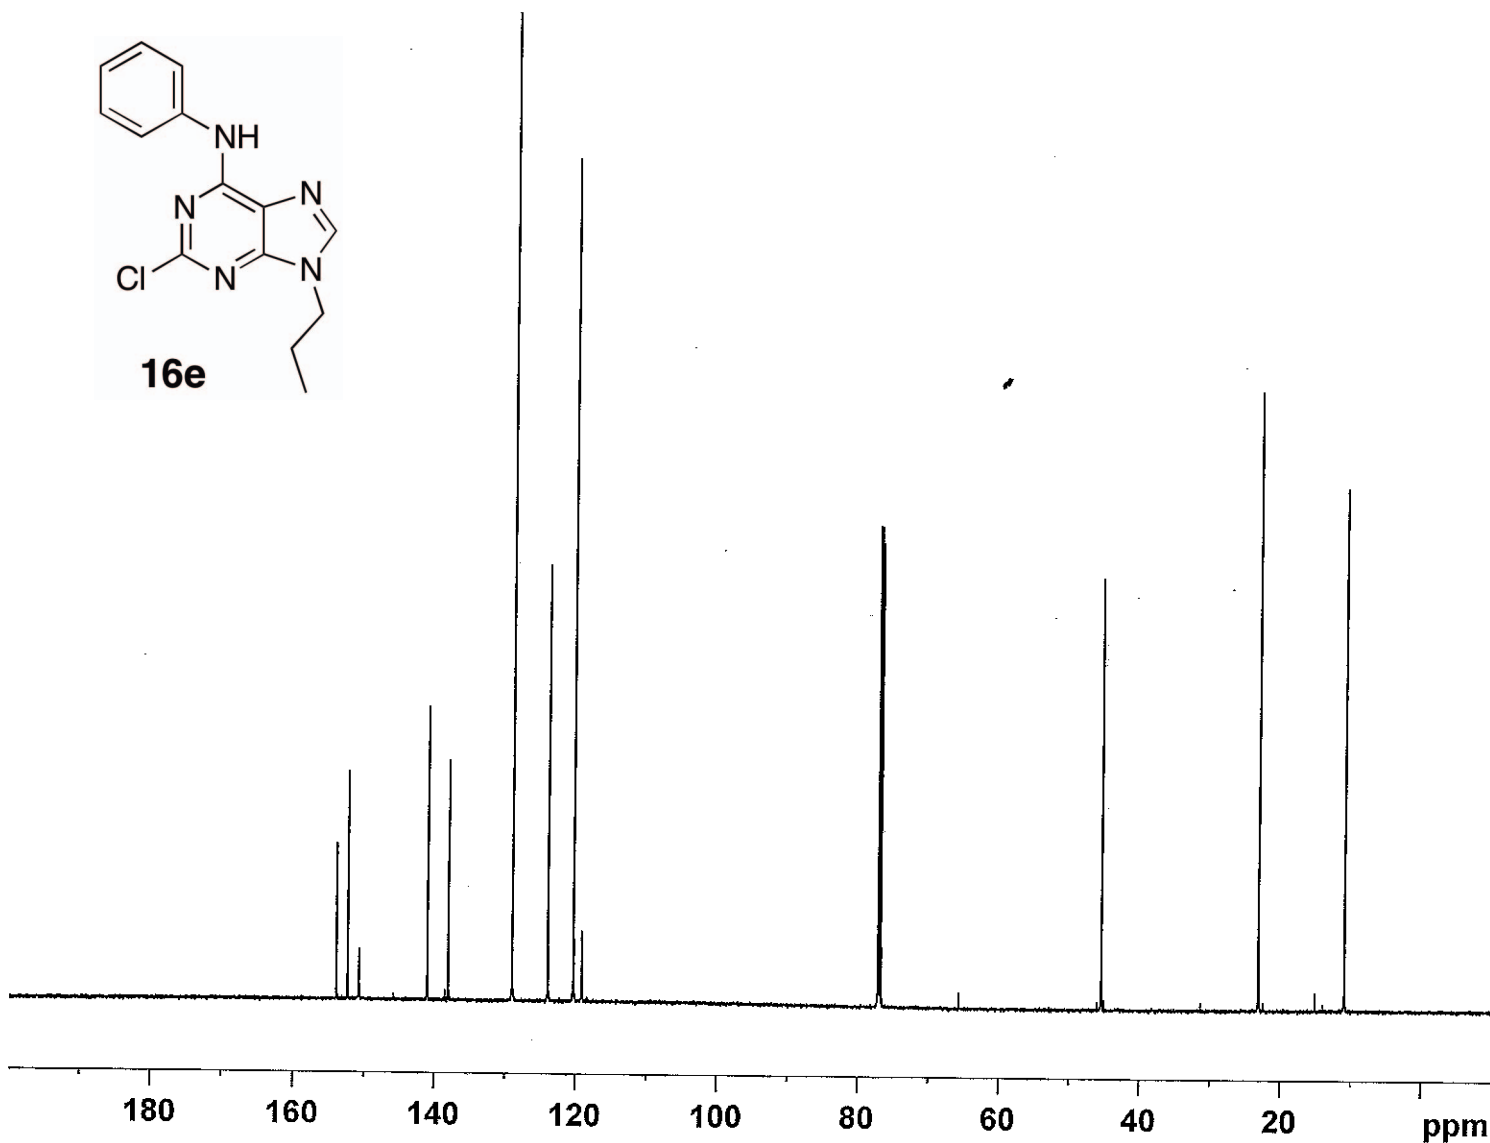

kb-NB-213-13

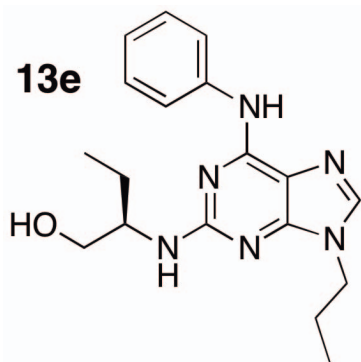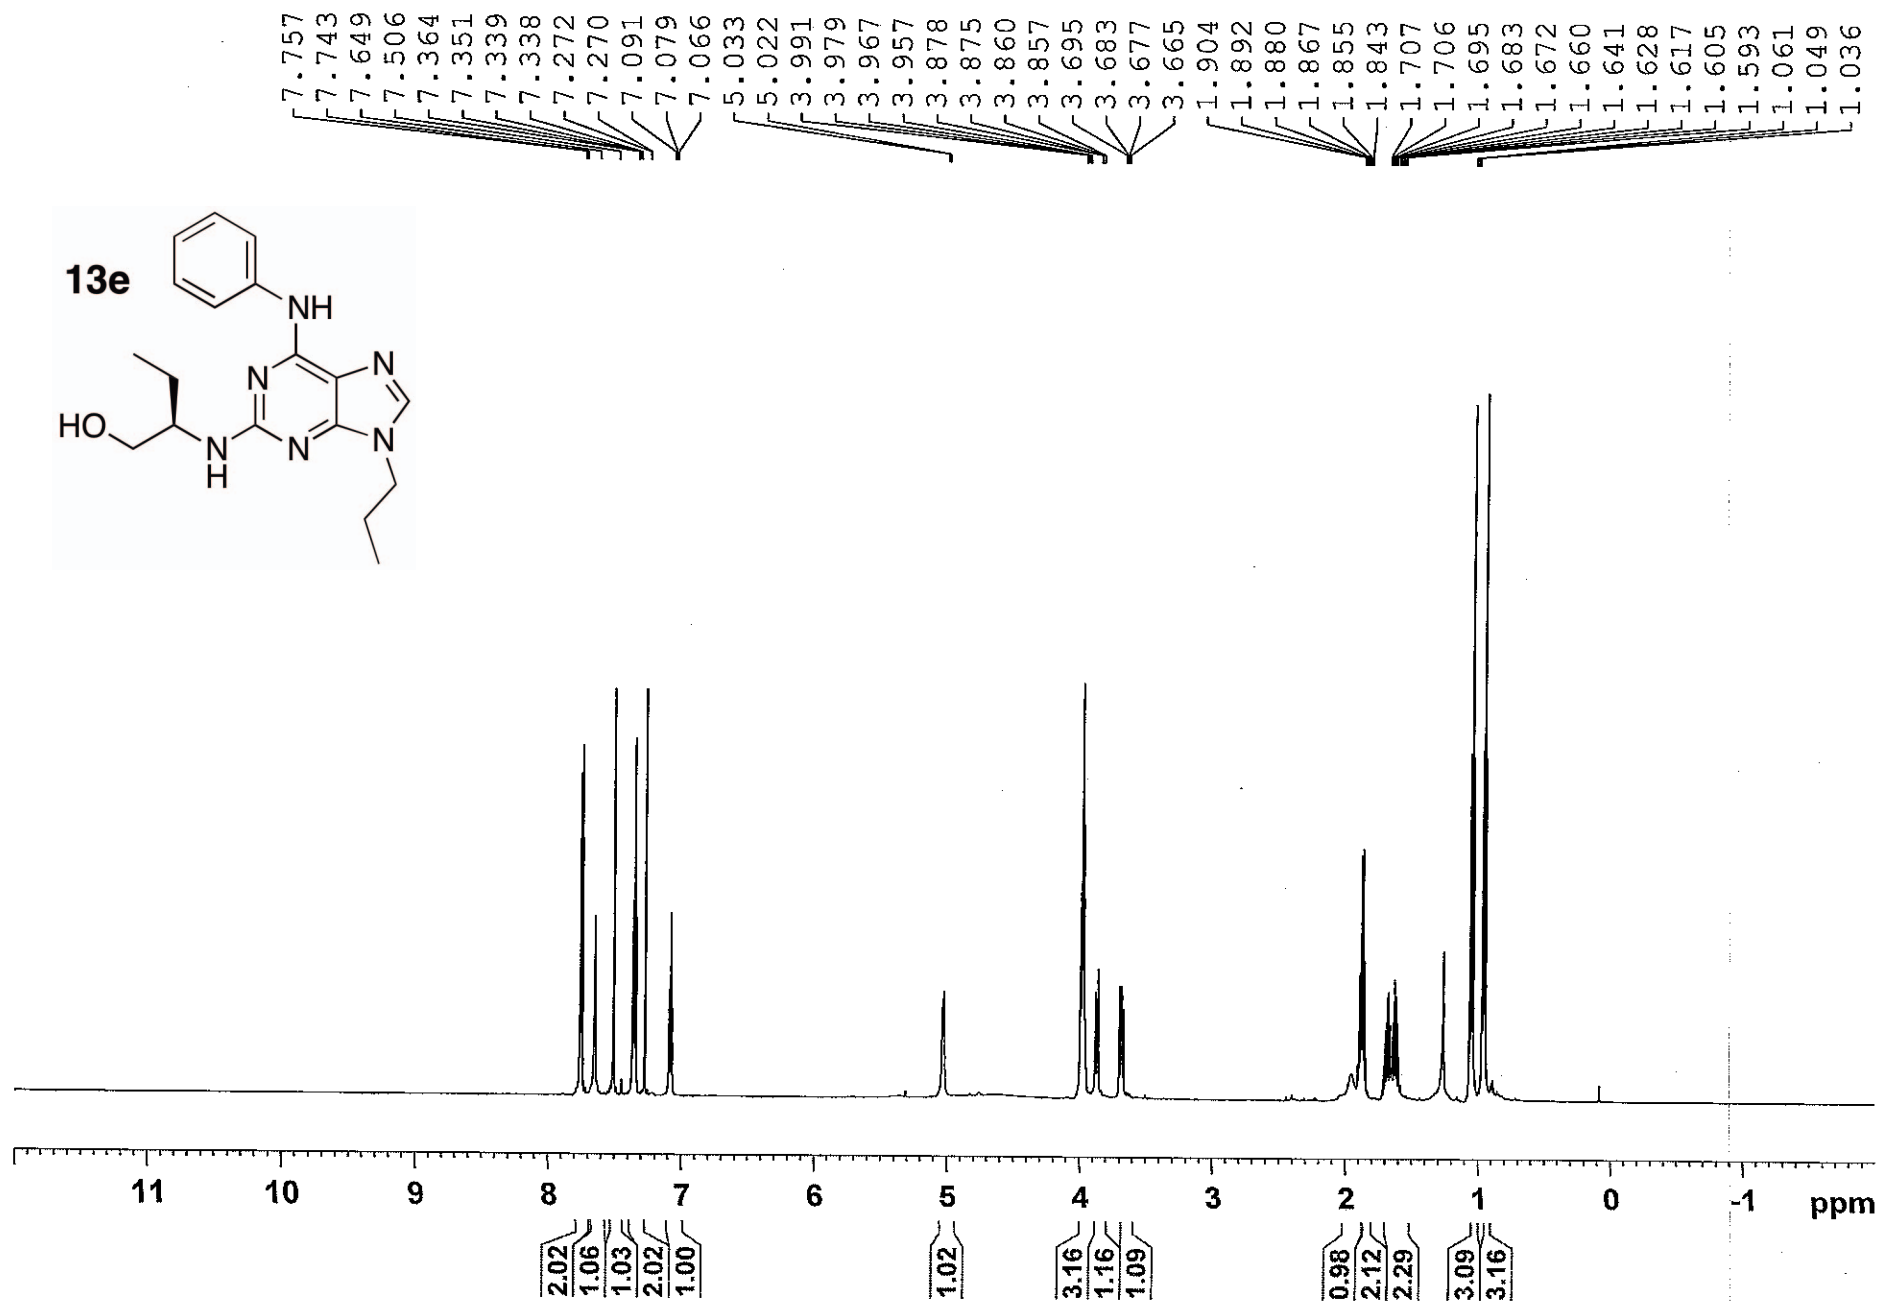

kb-NB-213-13

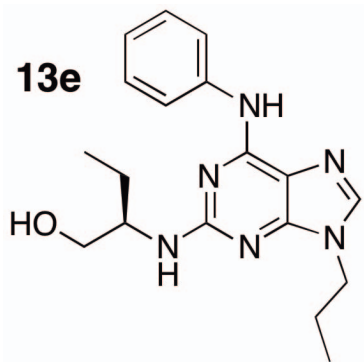

— 159.85  
— 152.36  
— 150.93  
— 138.97  
— 137.64  
— 128.85  
— 123.04  
— 120.01  
— 114.80  
  
— 56.14  
— 45.13  
  
— 29.68  
— 24.97  
— 23.18  
  
— 11.21  
— 10.91

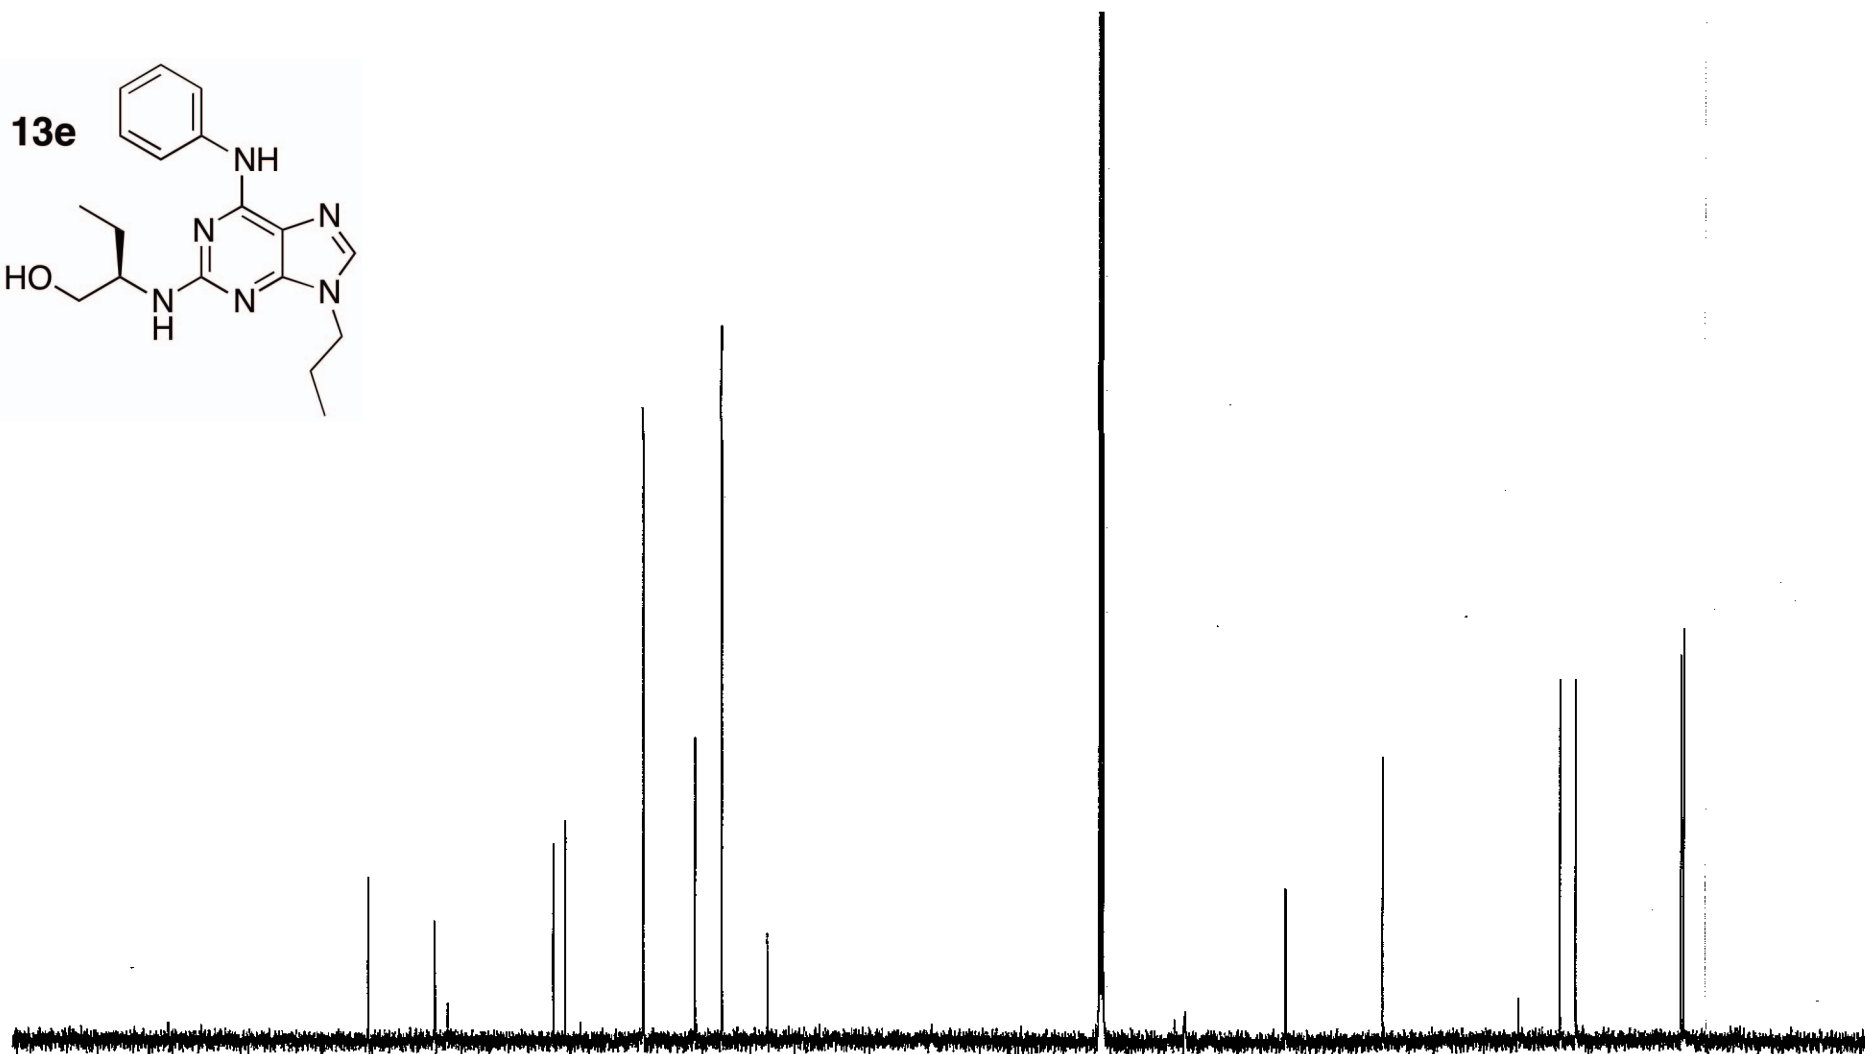

190 180 170 160 150 140 130 120 110 100 90 80 70 60 50 40 30 20 10 ppm

kb-NB-213-12

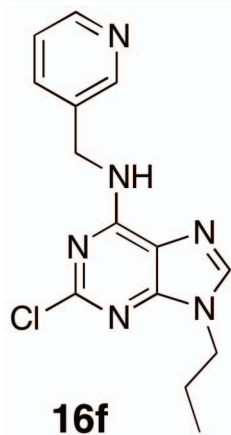

8.569  
8.469  
7.644  
7.631  
7.497  
7.330  
7.184  
7.176  
7.165

4.787  
4.059  
4.048  
4.036

1.850  
1.839  
1.827  
1.815  
0.903  
0.891  
0.879

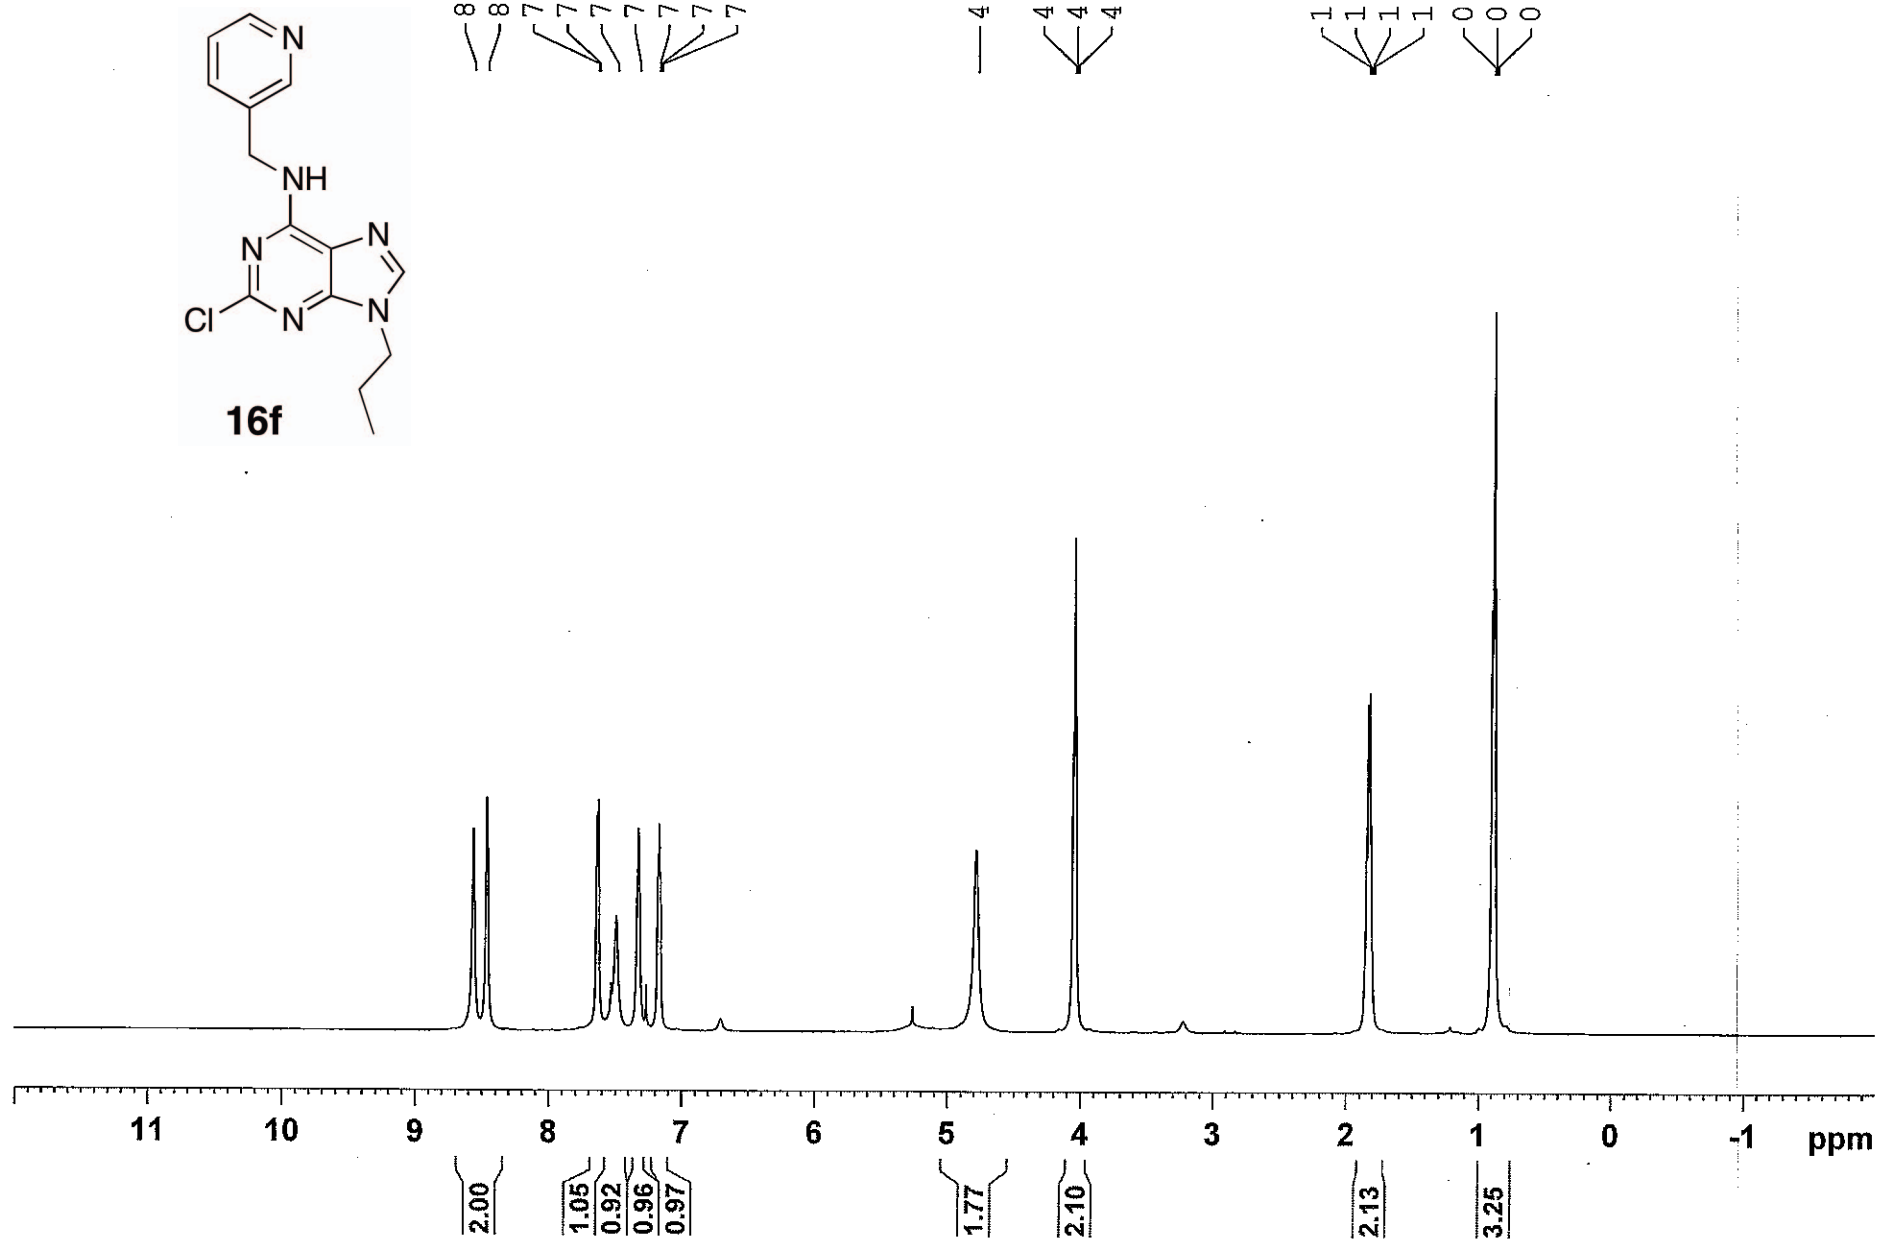

kb-NB-213-12

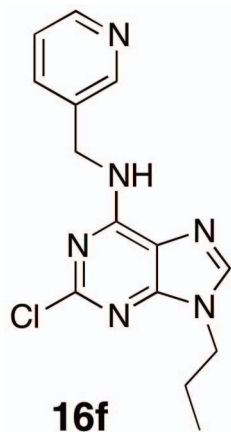

154.91  
154.27  
149.20  
148.79

140.22  
135.46  
133.73

123.35  
118.47

45.41  
41.83

23.16

10.96

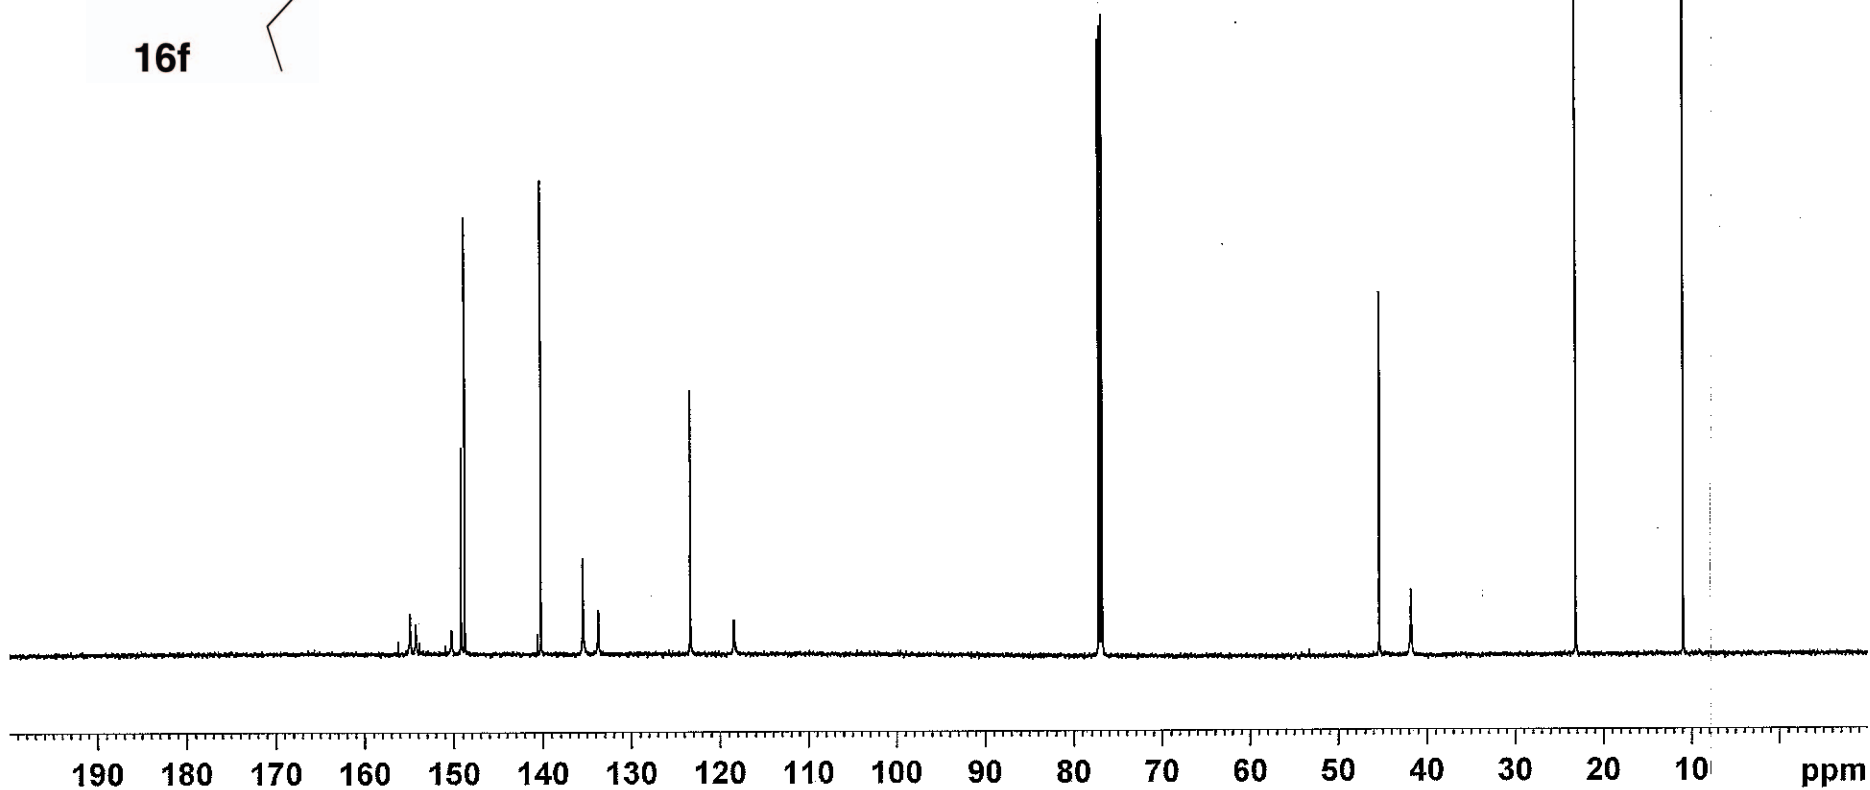



kb-NB-213-14

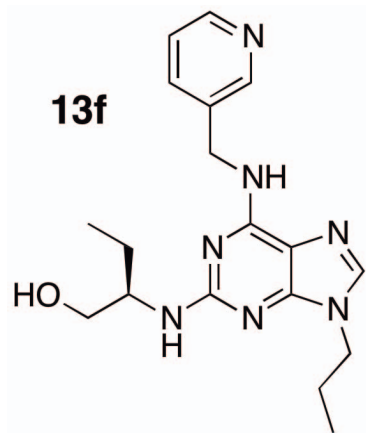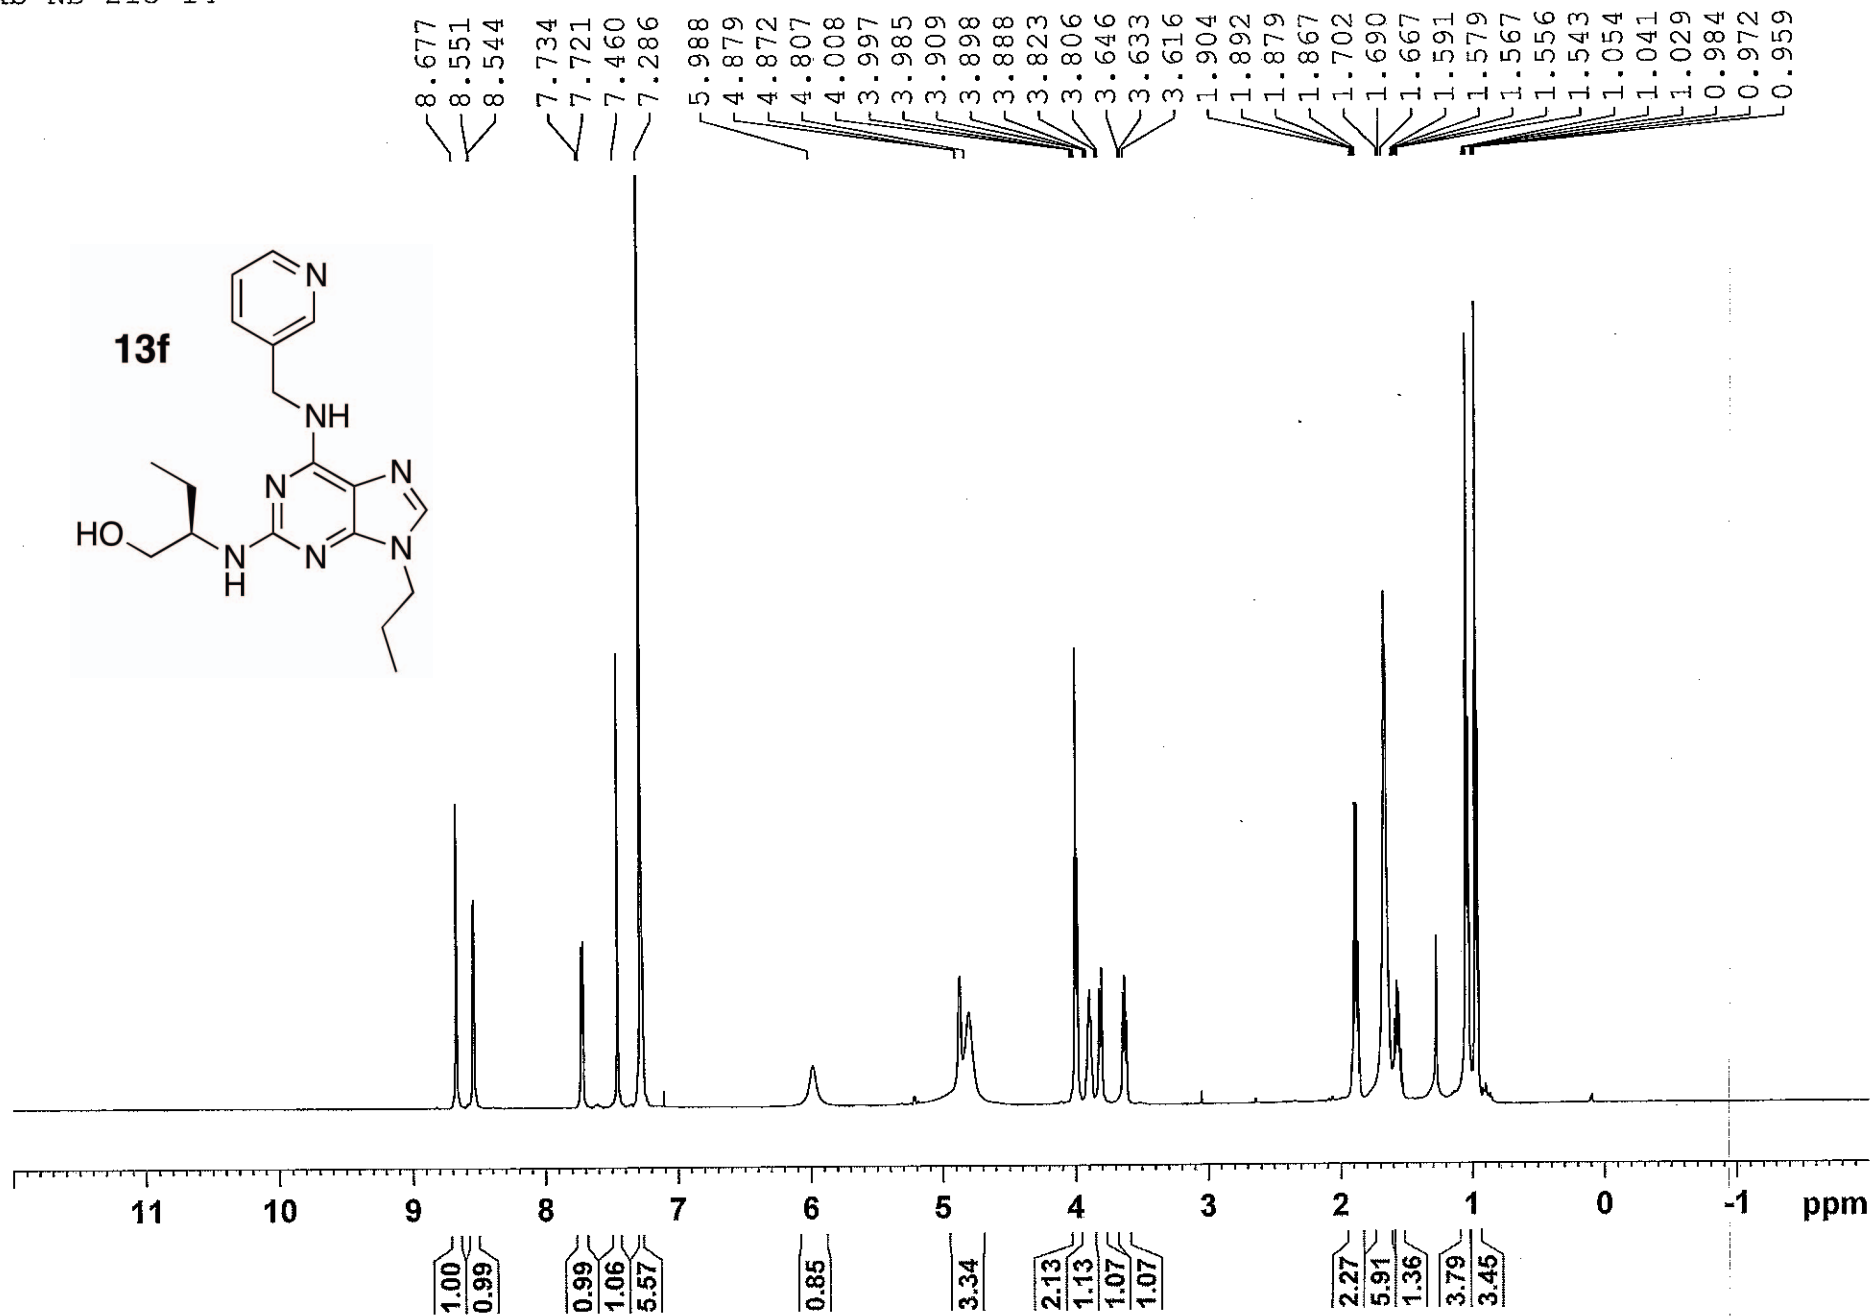

kb-NB-213-14

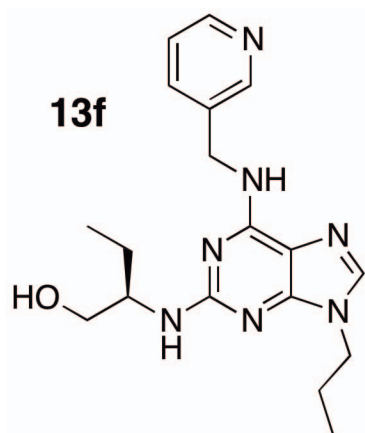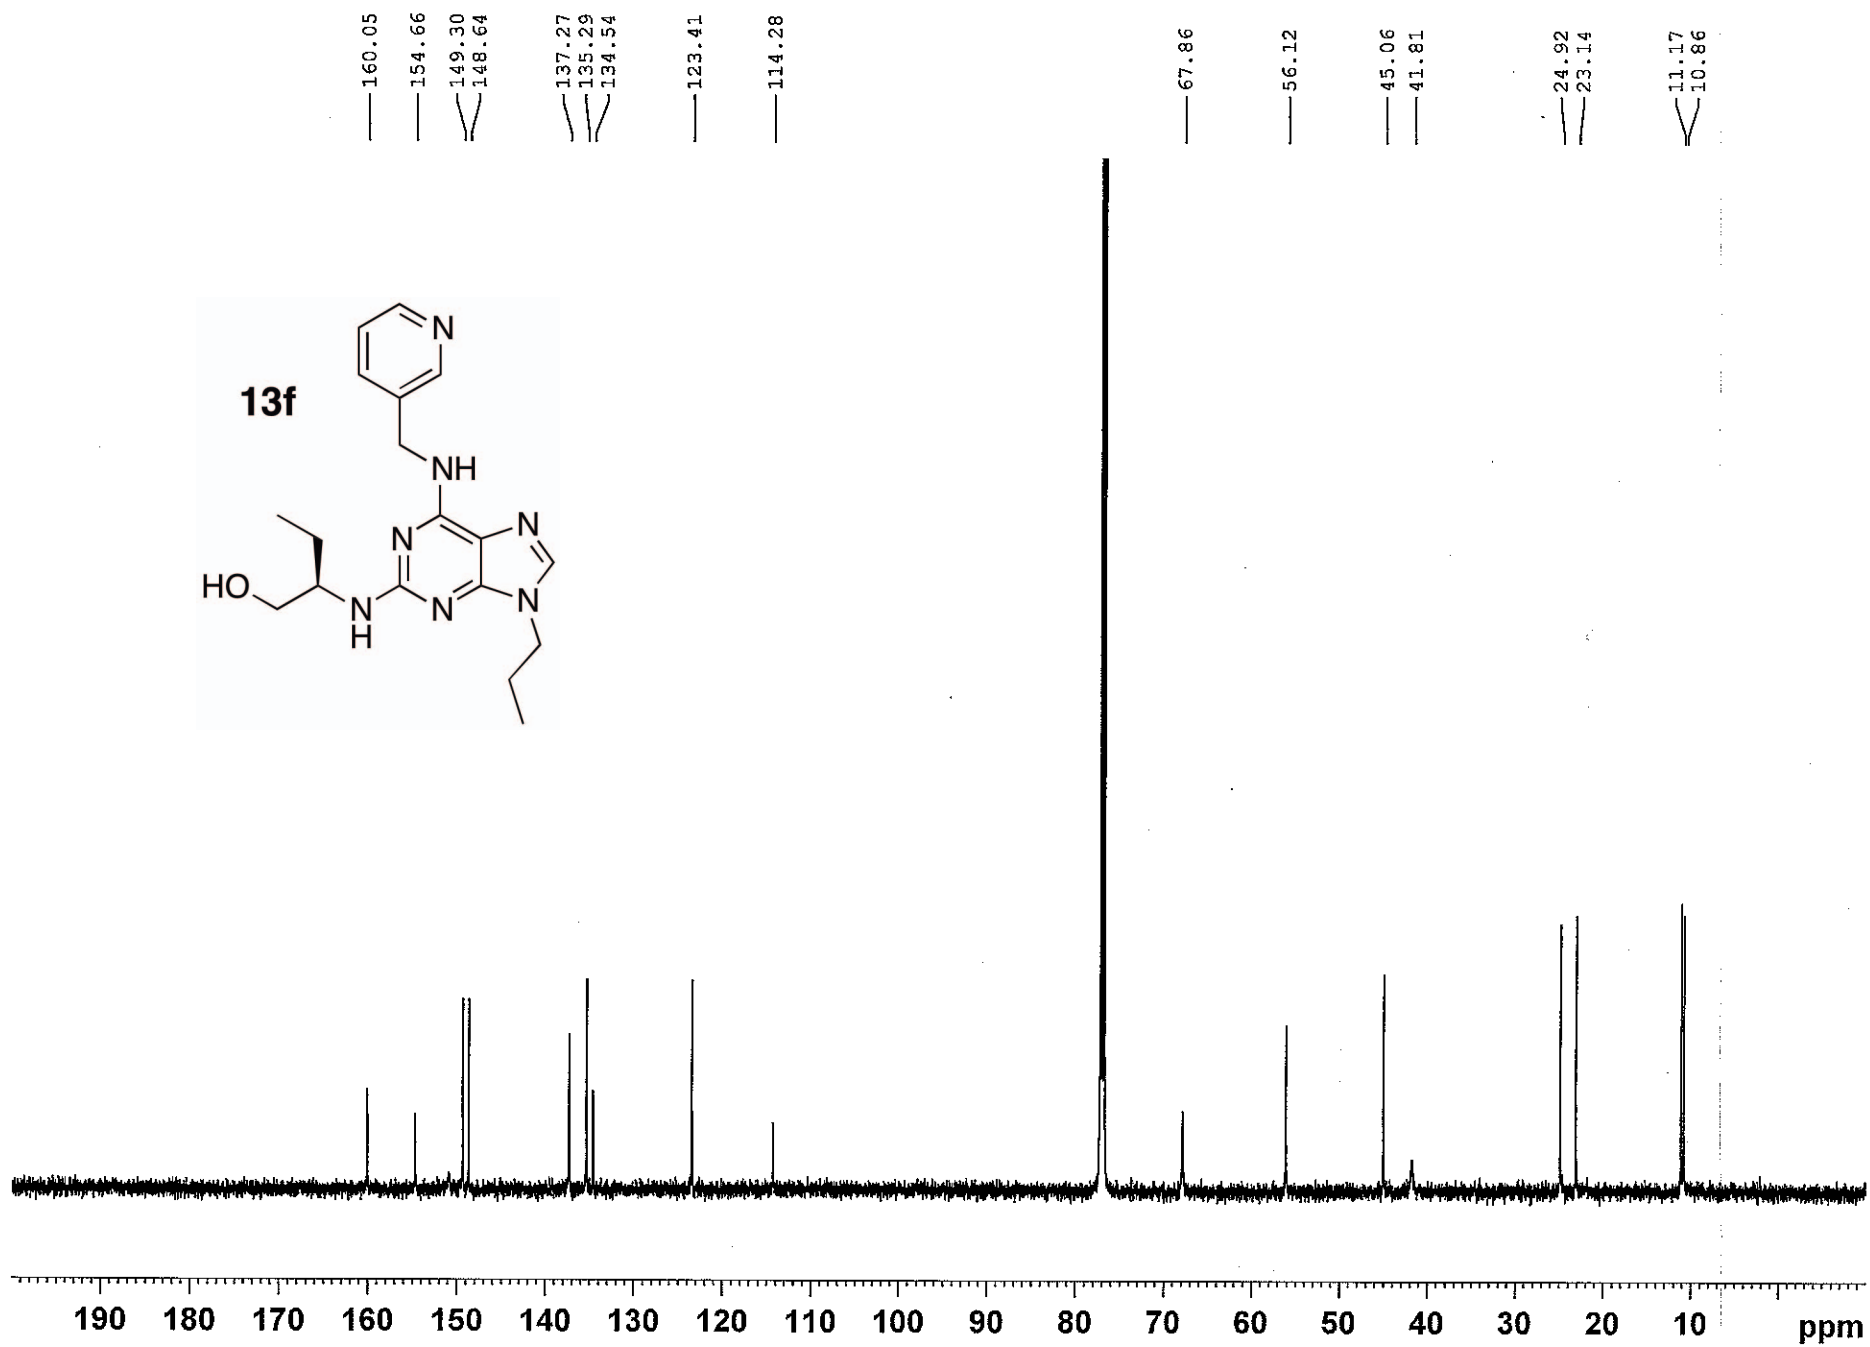

kb-NB-213-12

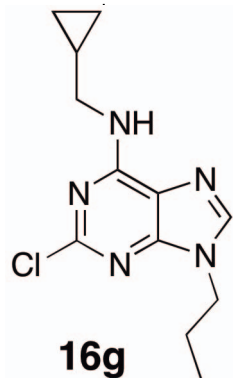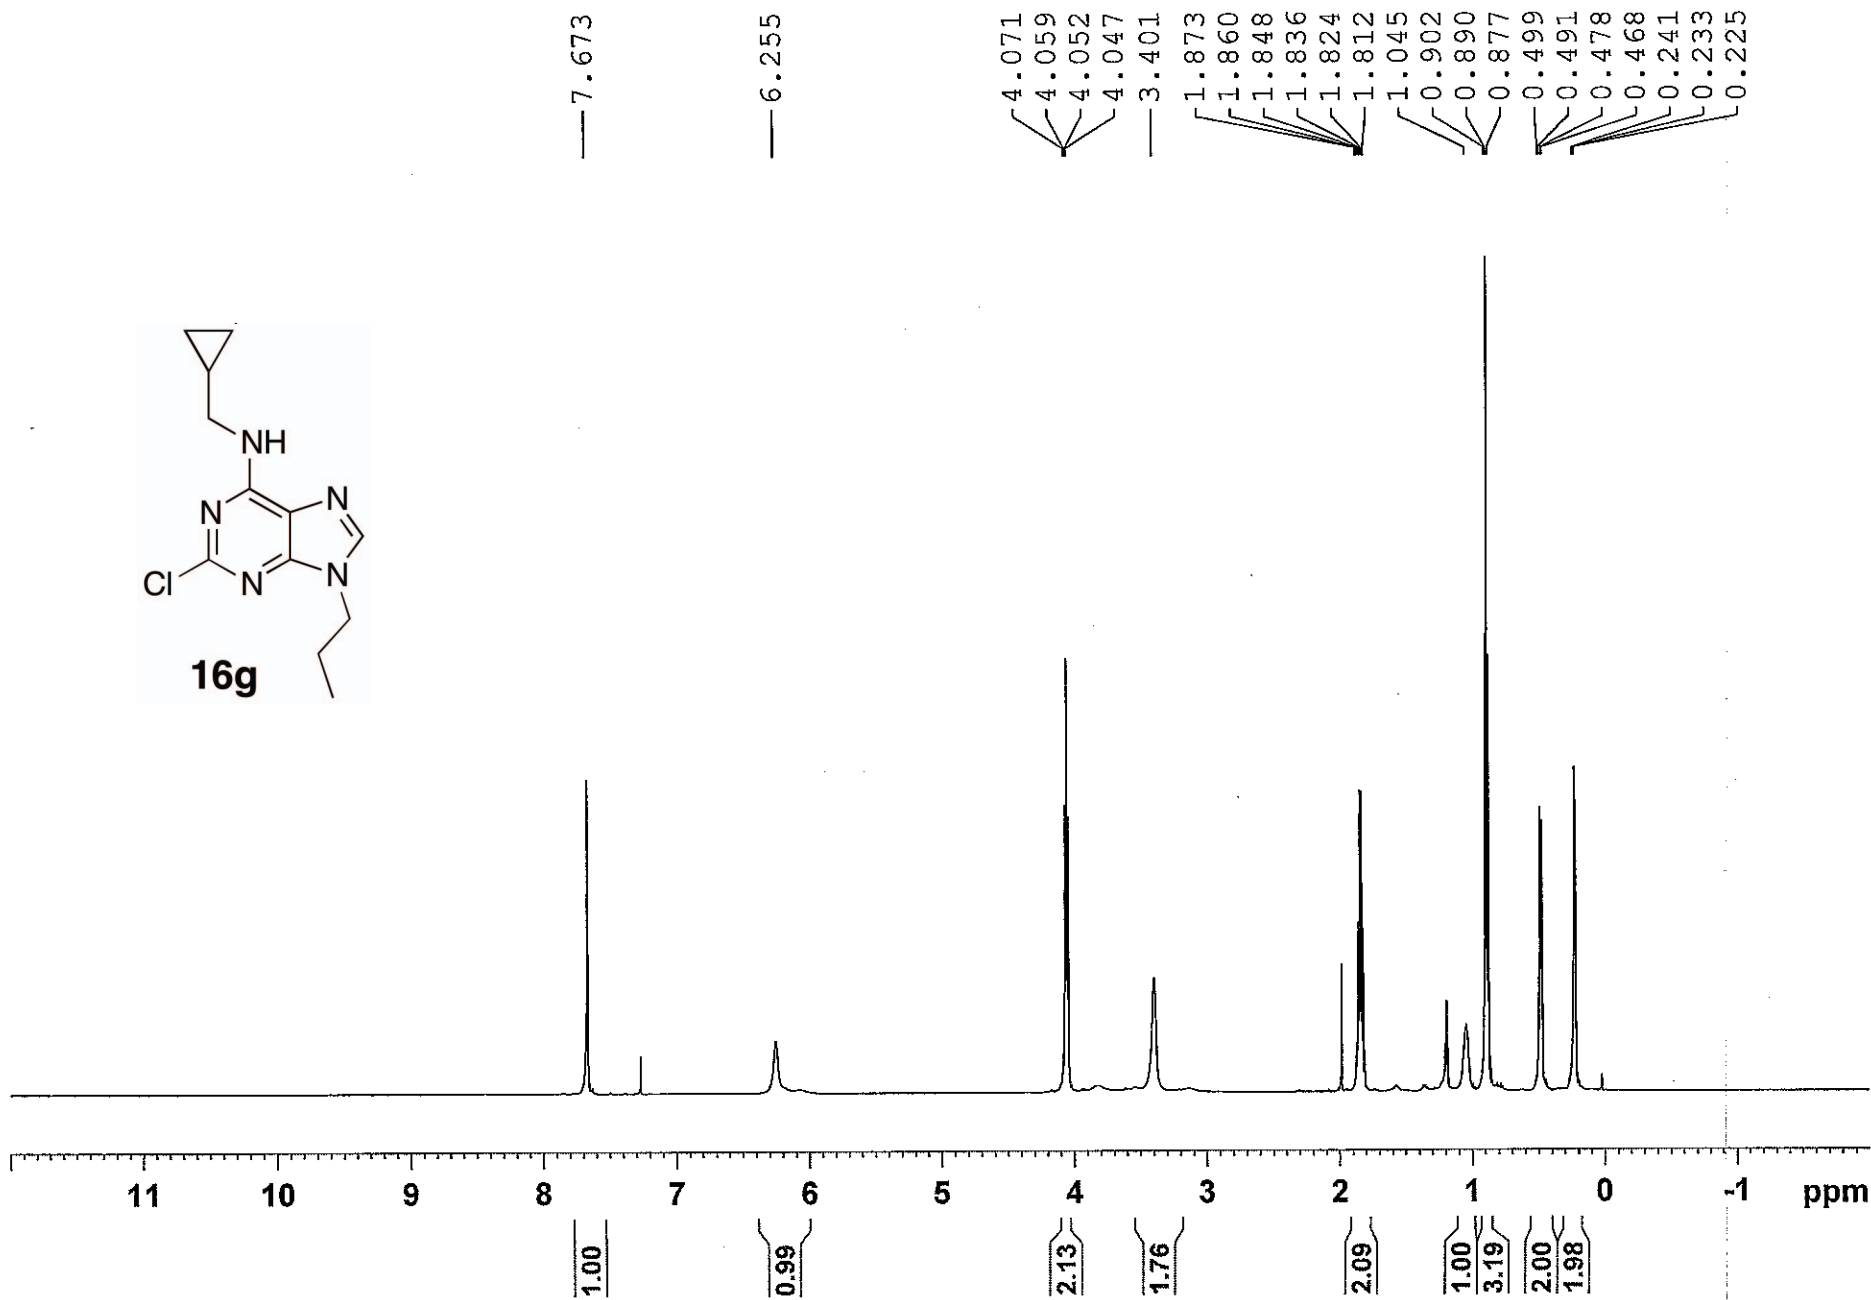

kb-NB-213-12

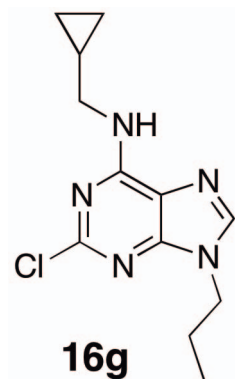

155.00  
154.32  
149.87

139.82

118.43

60.20

45.59  
45.31

23.19

10.92  
10.47

3.38

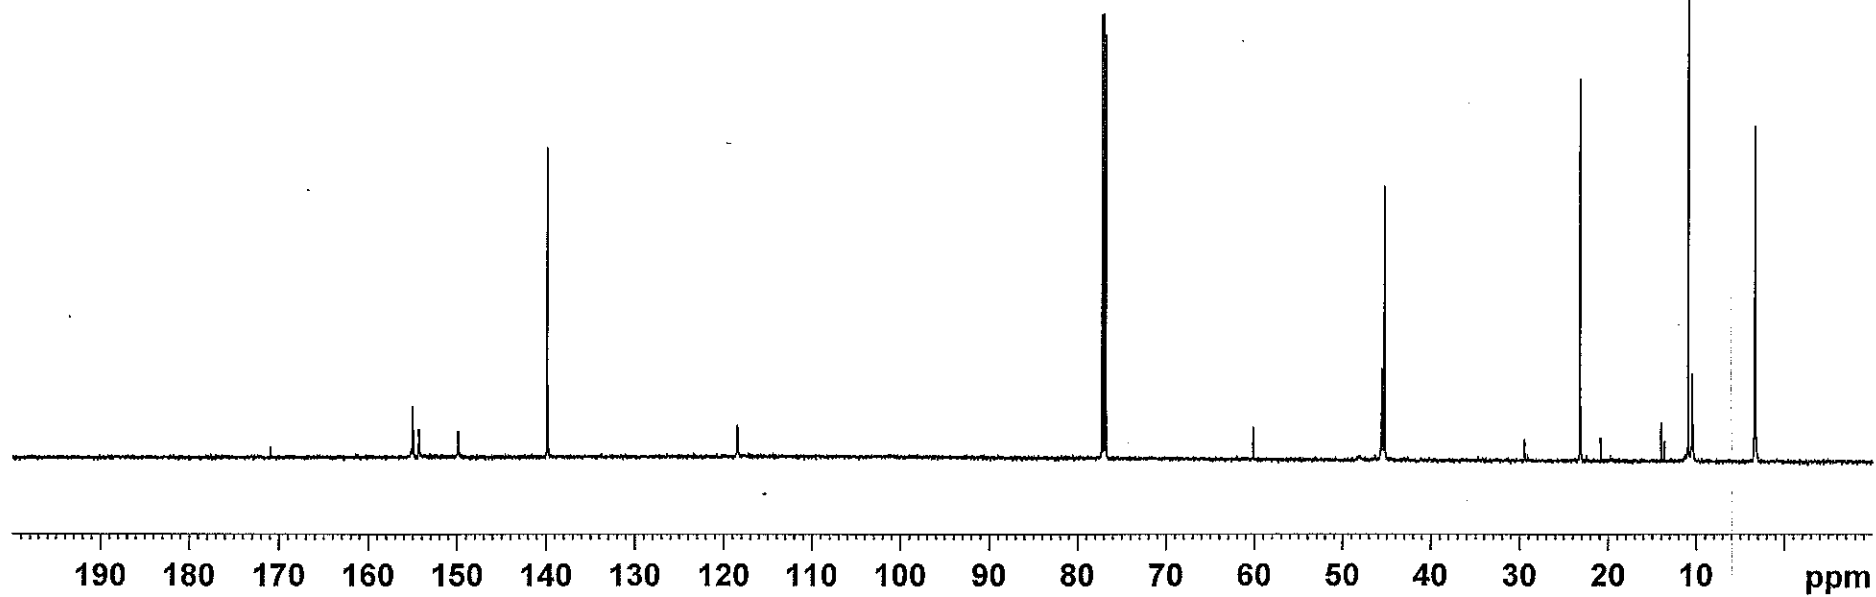

kb-NB-213-16

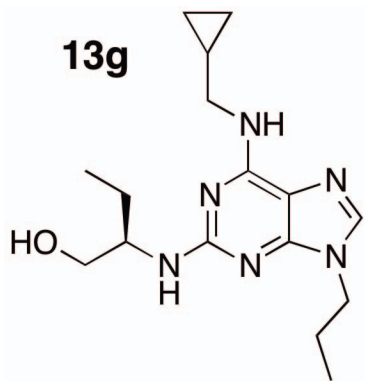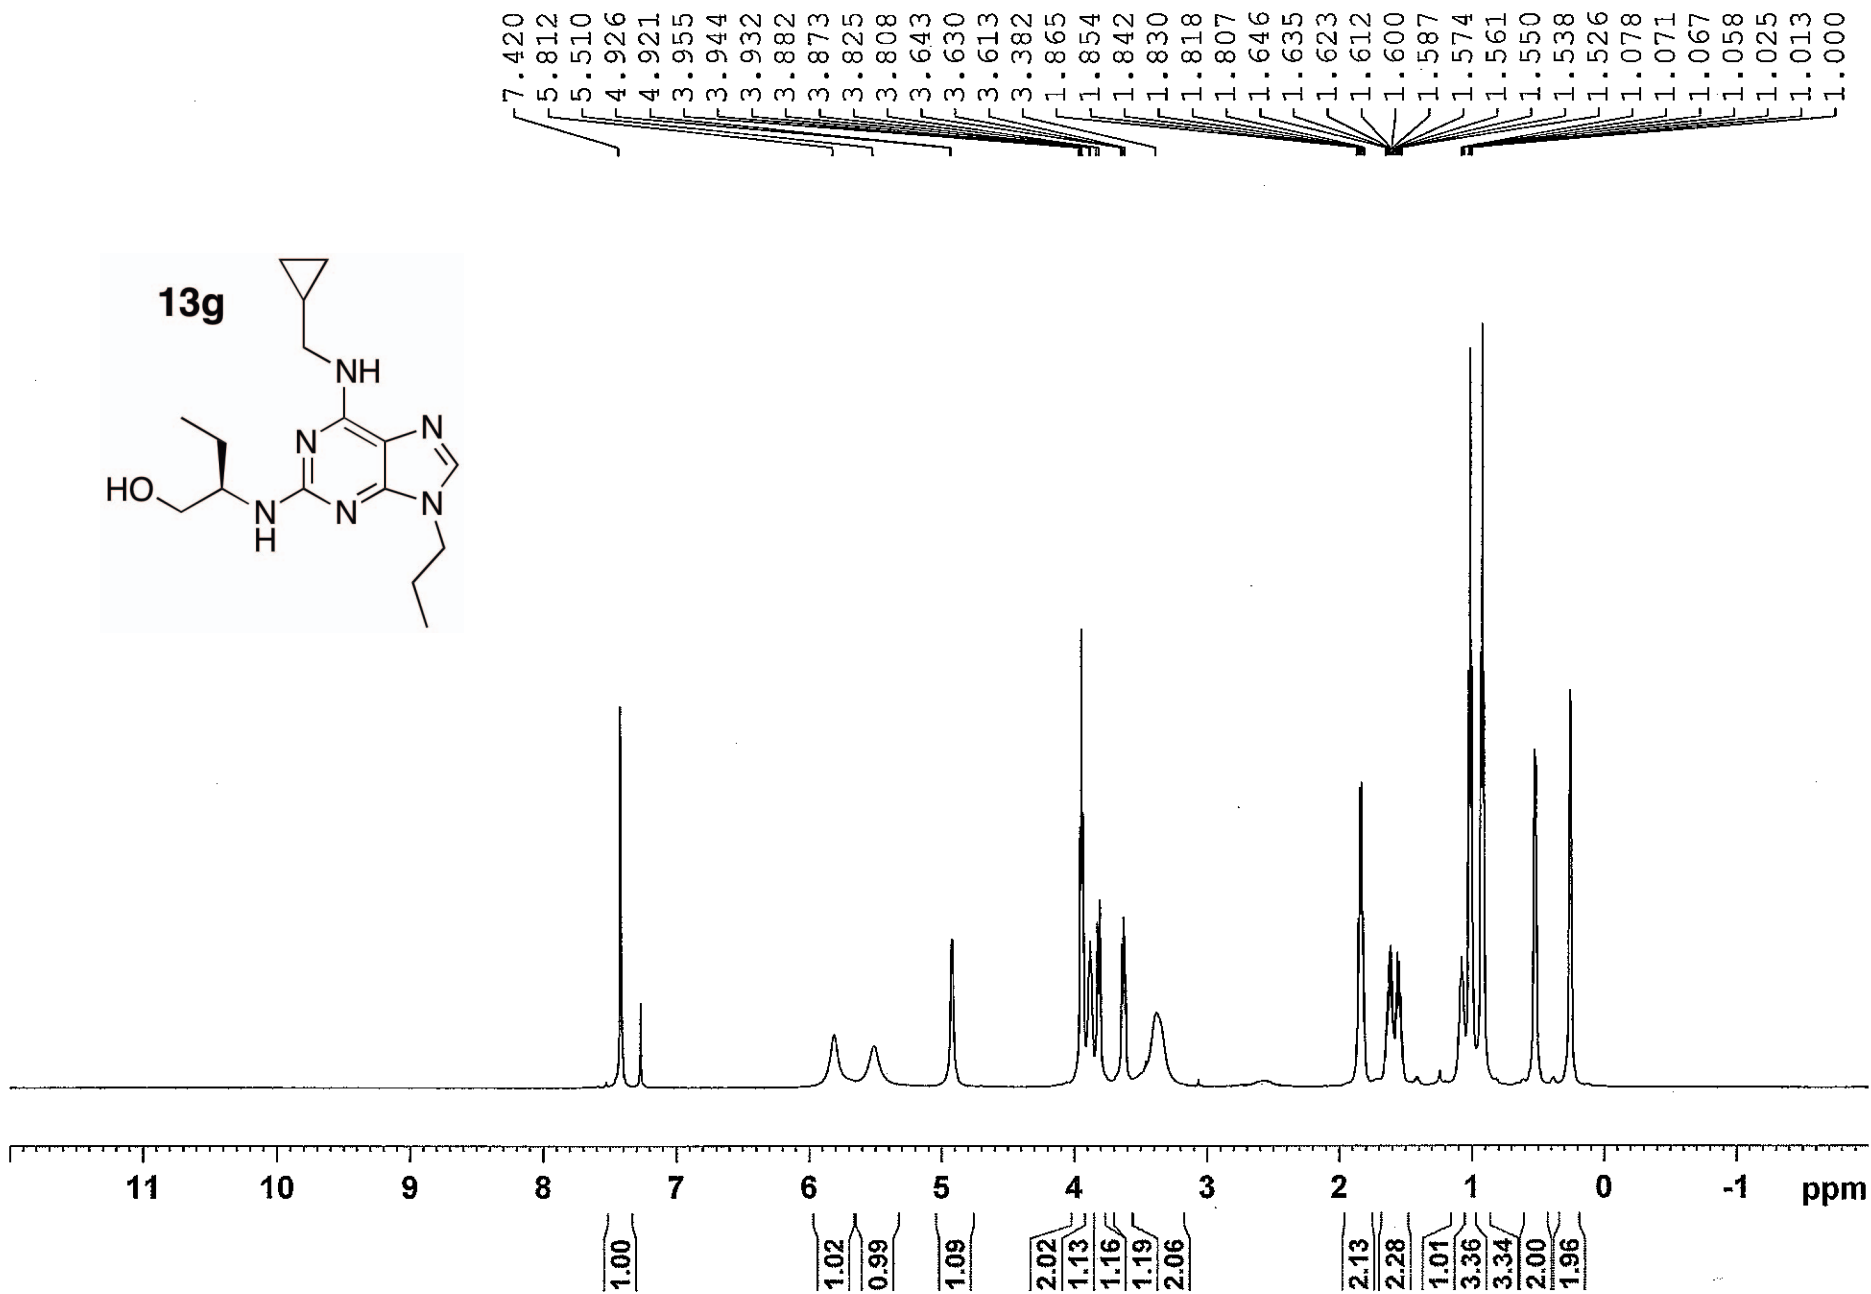

kb-NB-213-16

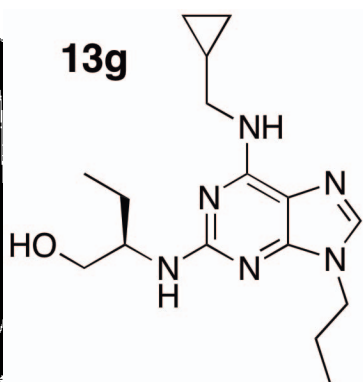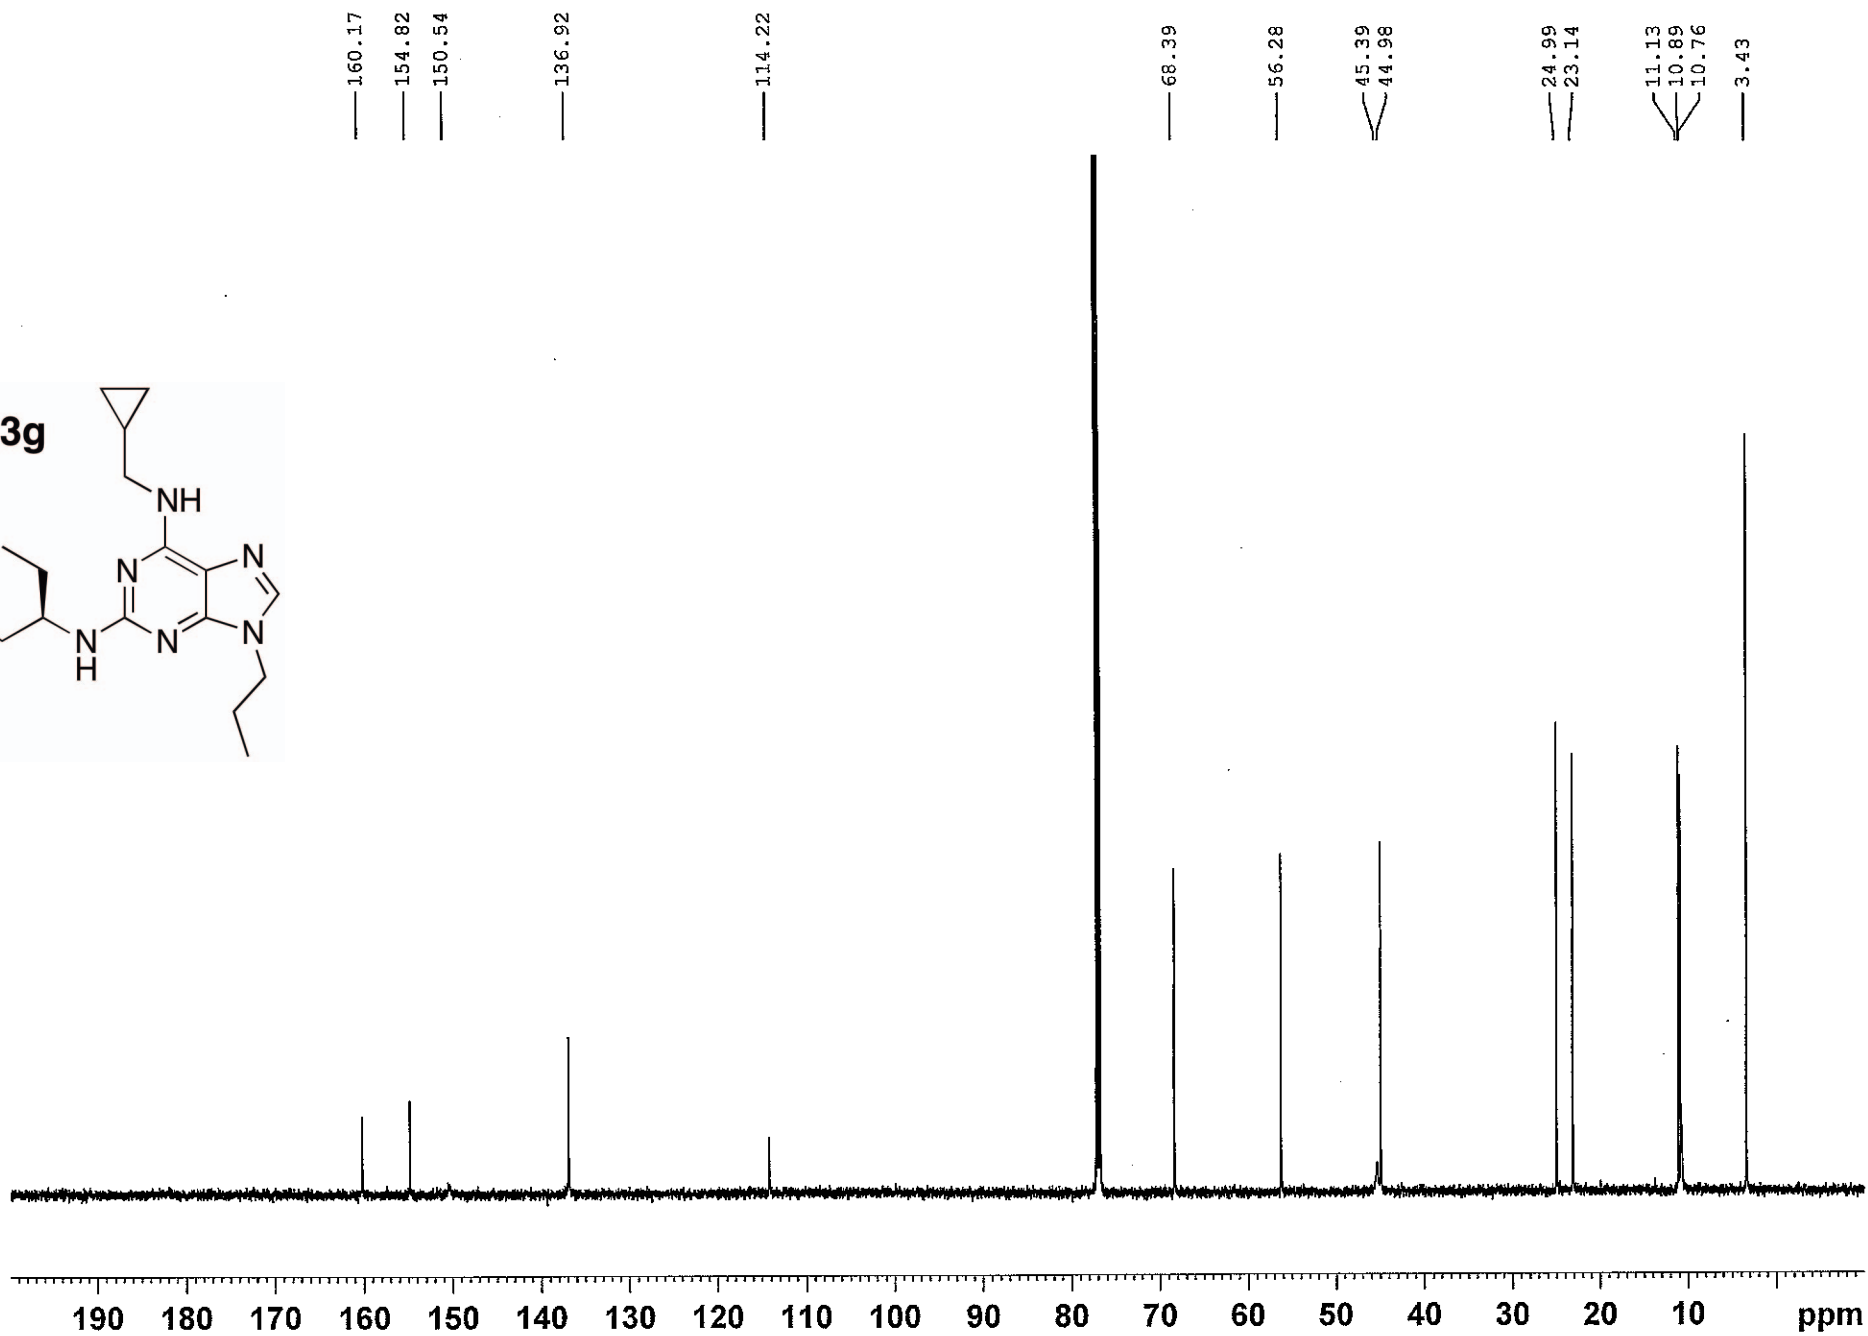

kb-NB-213-09-1

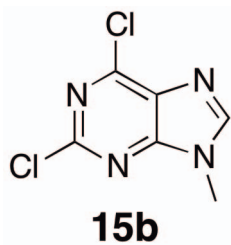

— 8.094

— 3.886

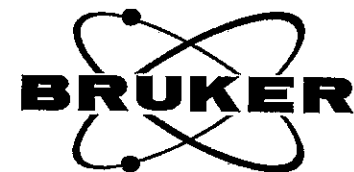

NAME kb-NB-213-09-1  
EXPNO 1  
PROCNO 1  
Date\_ 20090724  
Time\_ 20.15  
INSTRUM spect  
PROBHD 5 mm CPTCI 1H-  
PULPROG zg30  
TD 65536  
SOLVENT CDC13  
NS 16  
DS 2  
SWH 12376.237 Hz  
FIDRES 0.188846 Hz  
AQ 2.6477449 sec  
RG 28.5  
DW 40.400 usec  
DE 6.50 usec  
TE 298.0 K  
D1 1.0000000 sec  
TD0 1

===== CHANNEL f1 =====  
NUC1 1H  
P1 8.00 usec  
PL1 4.00 dB  
PL1W 7.00000000 W  
SF01 600.1337060 MHz  
SI 32768  
SF 600.1300042 MHz  
WDW EM  
SSB 0  
LB 0.30 Hz  
GB 0  
PC 1.00

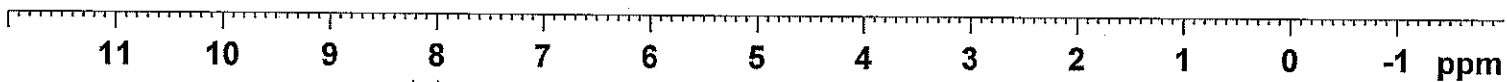

1.00

3.12

kb-NB-213-09-1

153.28  
152.66  
151.31  
146.37

130.38

30.43

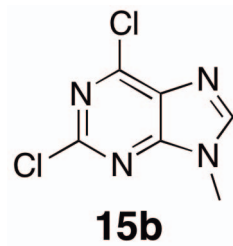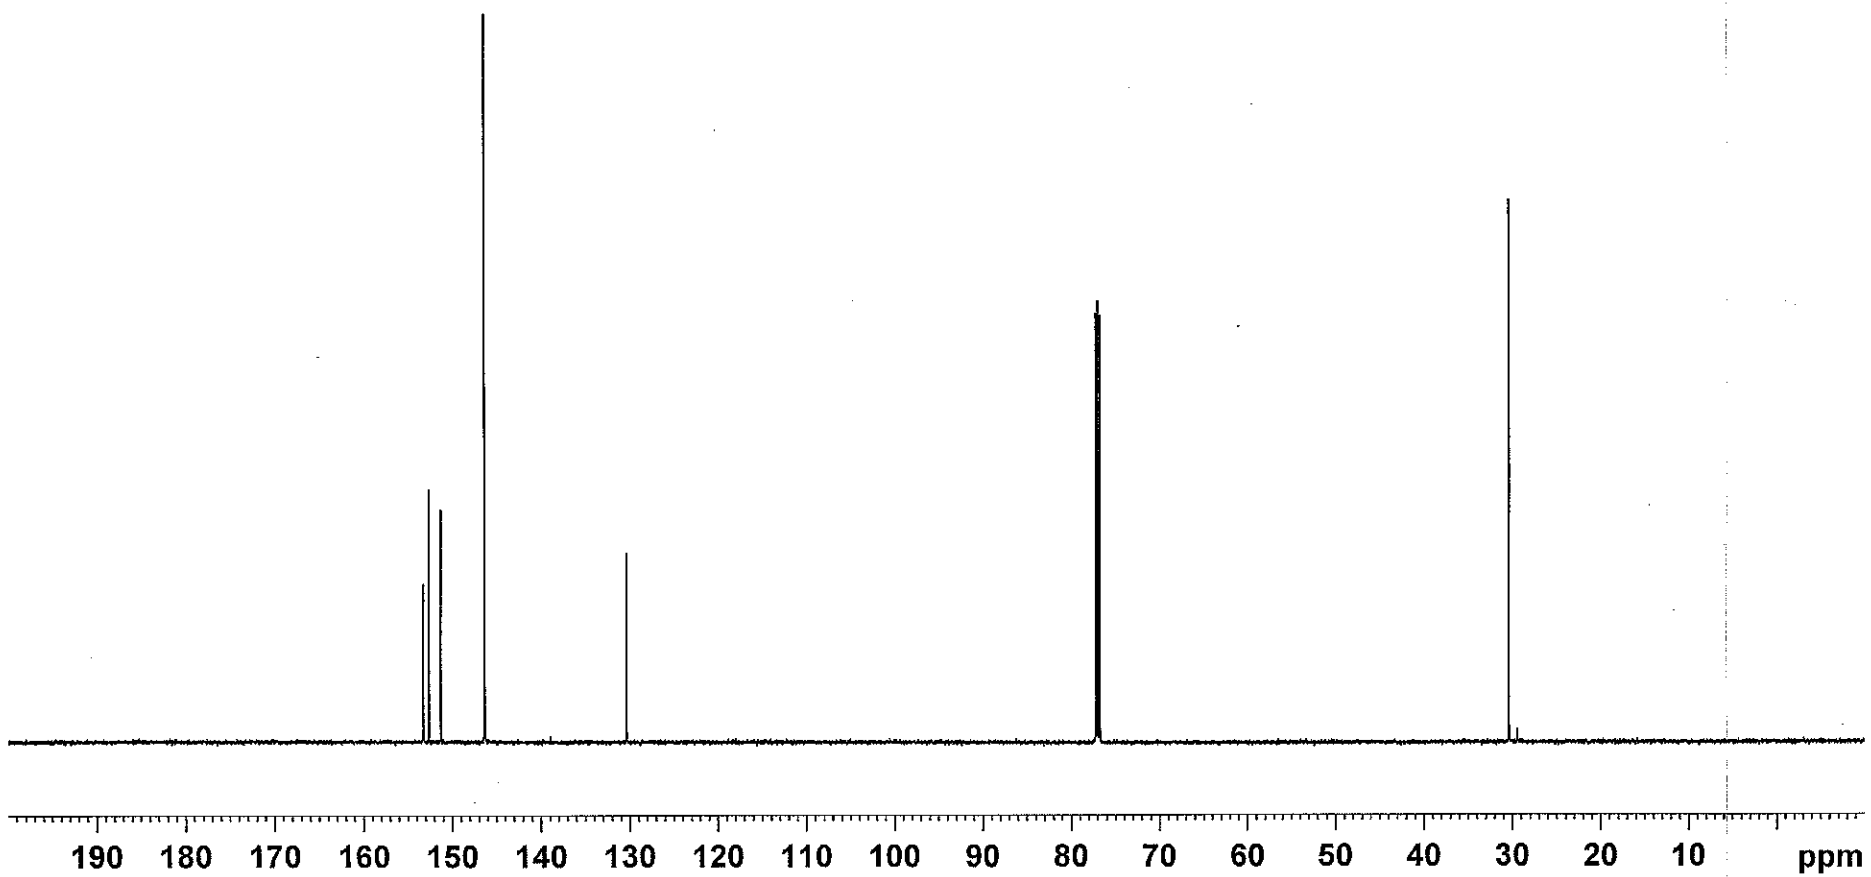



kb-NB-213-17

7.639  
7.492  
7.479  
7.385  
7.372  
7.350  
7.338  
7.327  
7.324  
7.270  
7.259  
7.257  
7.245  
7.233

4.742

3.800  
3.765  
3.694

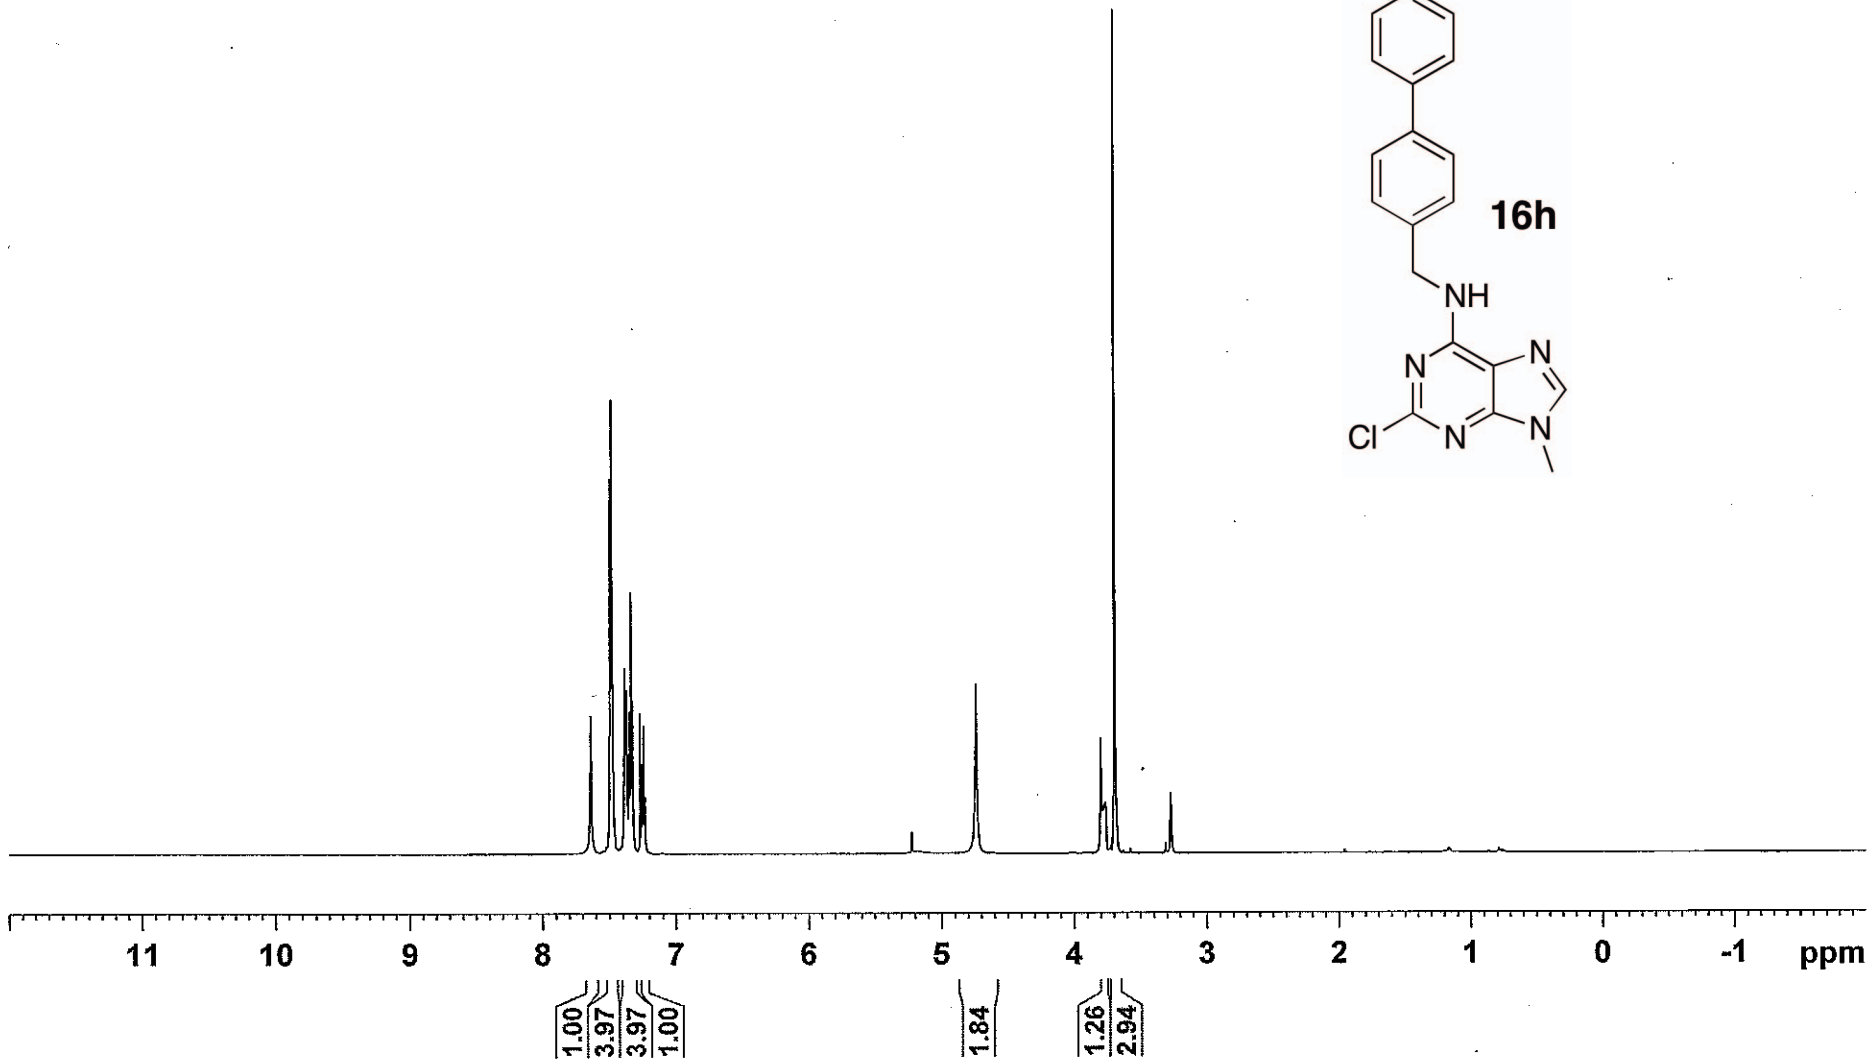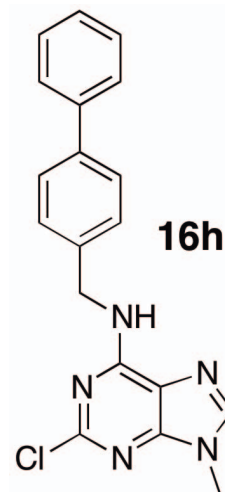

kb-NB-213-17

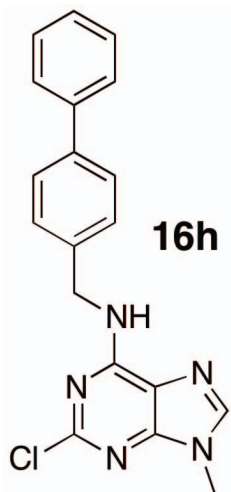

154.73  
154.52  
150.12  
140.50  
140.46  
140.26  
136.70  
128.55  
128.19  
127.11  
126.78  
117.83

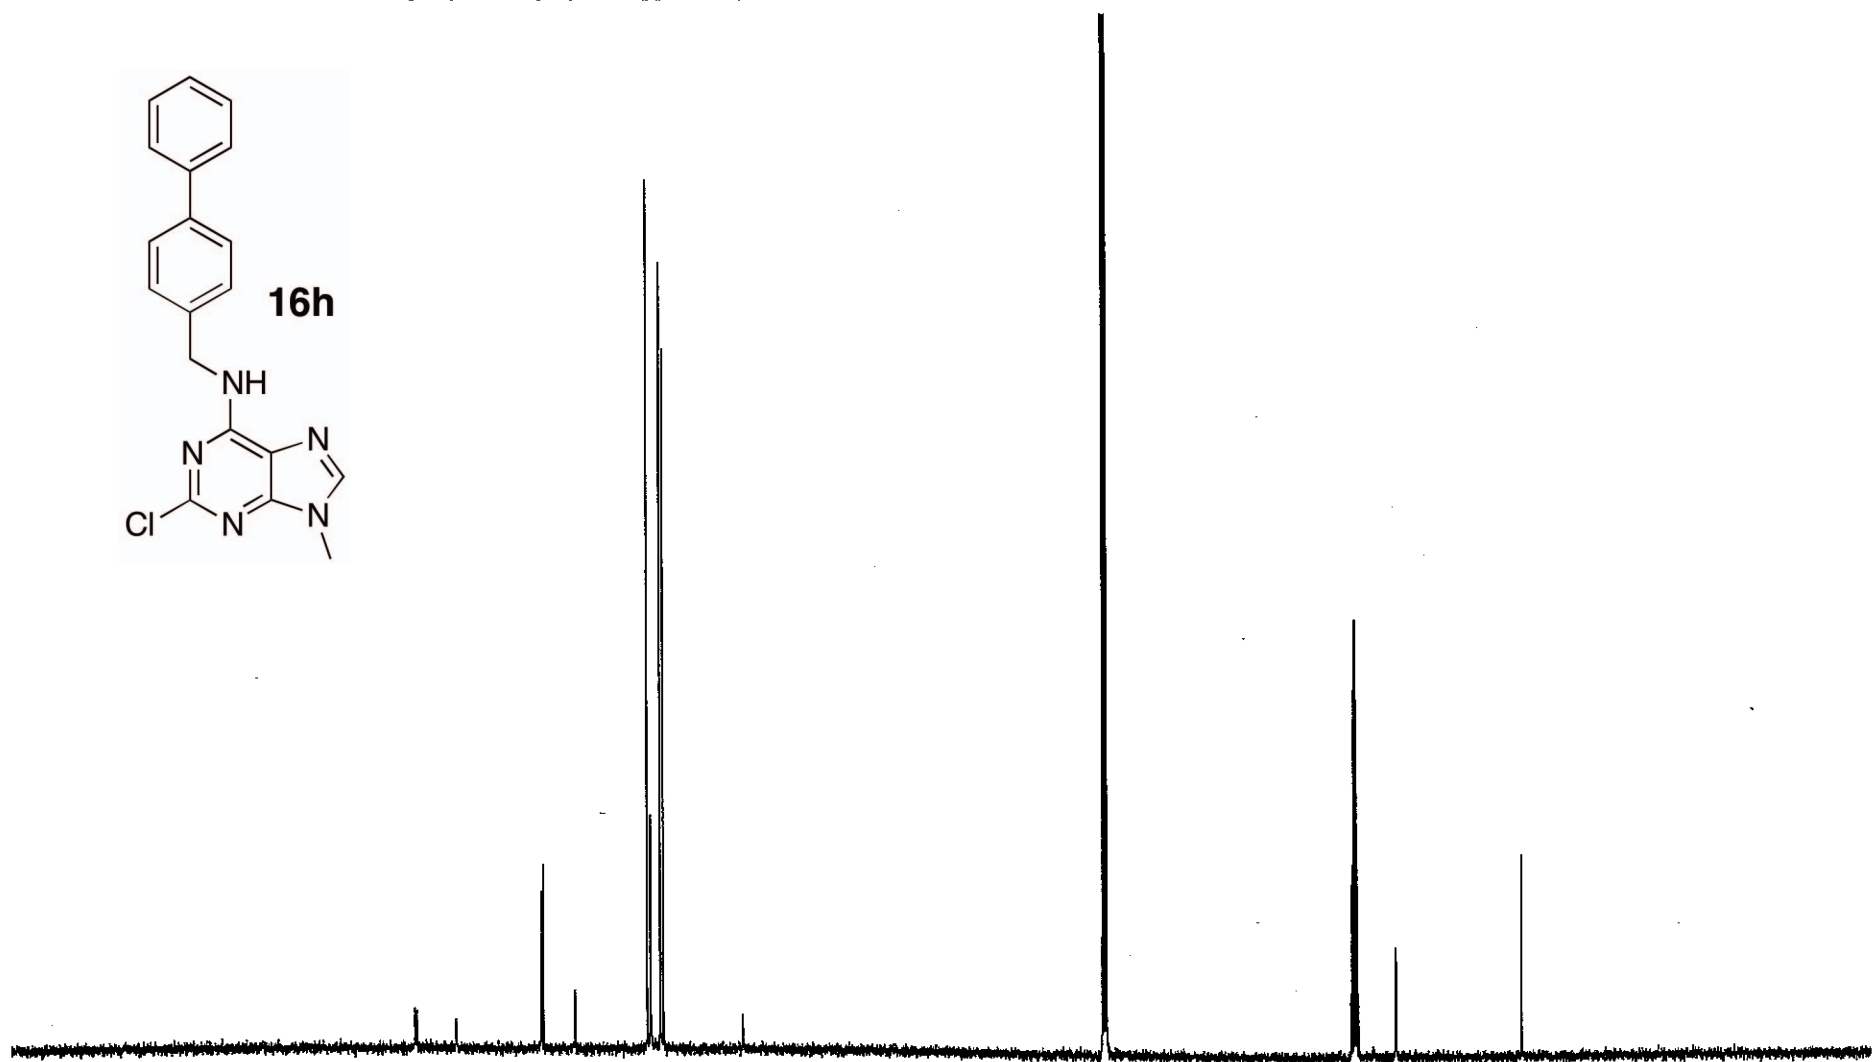

44.06  
29.79

190 180 170 160 150 140 130 120 110 100 90 80 70 60 50 40 30 20 10 ppm

kb-NB-213-20

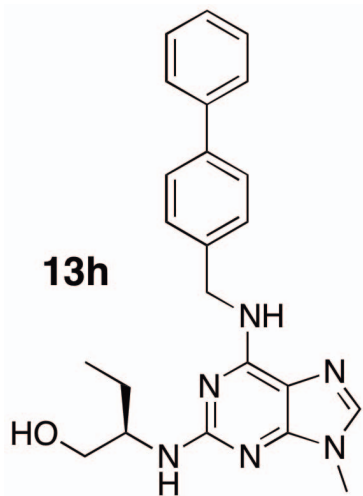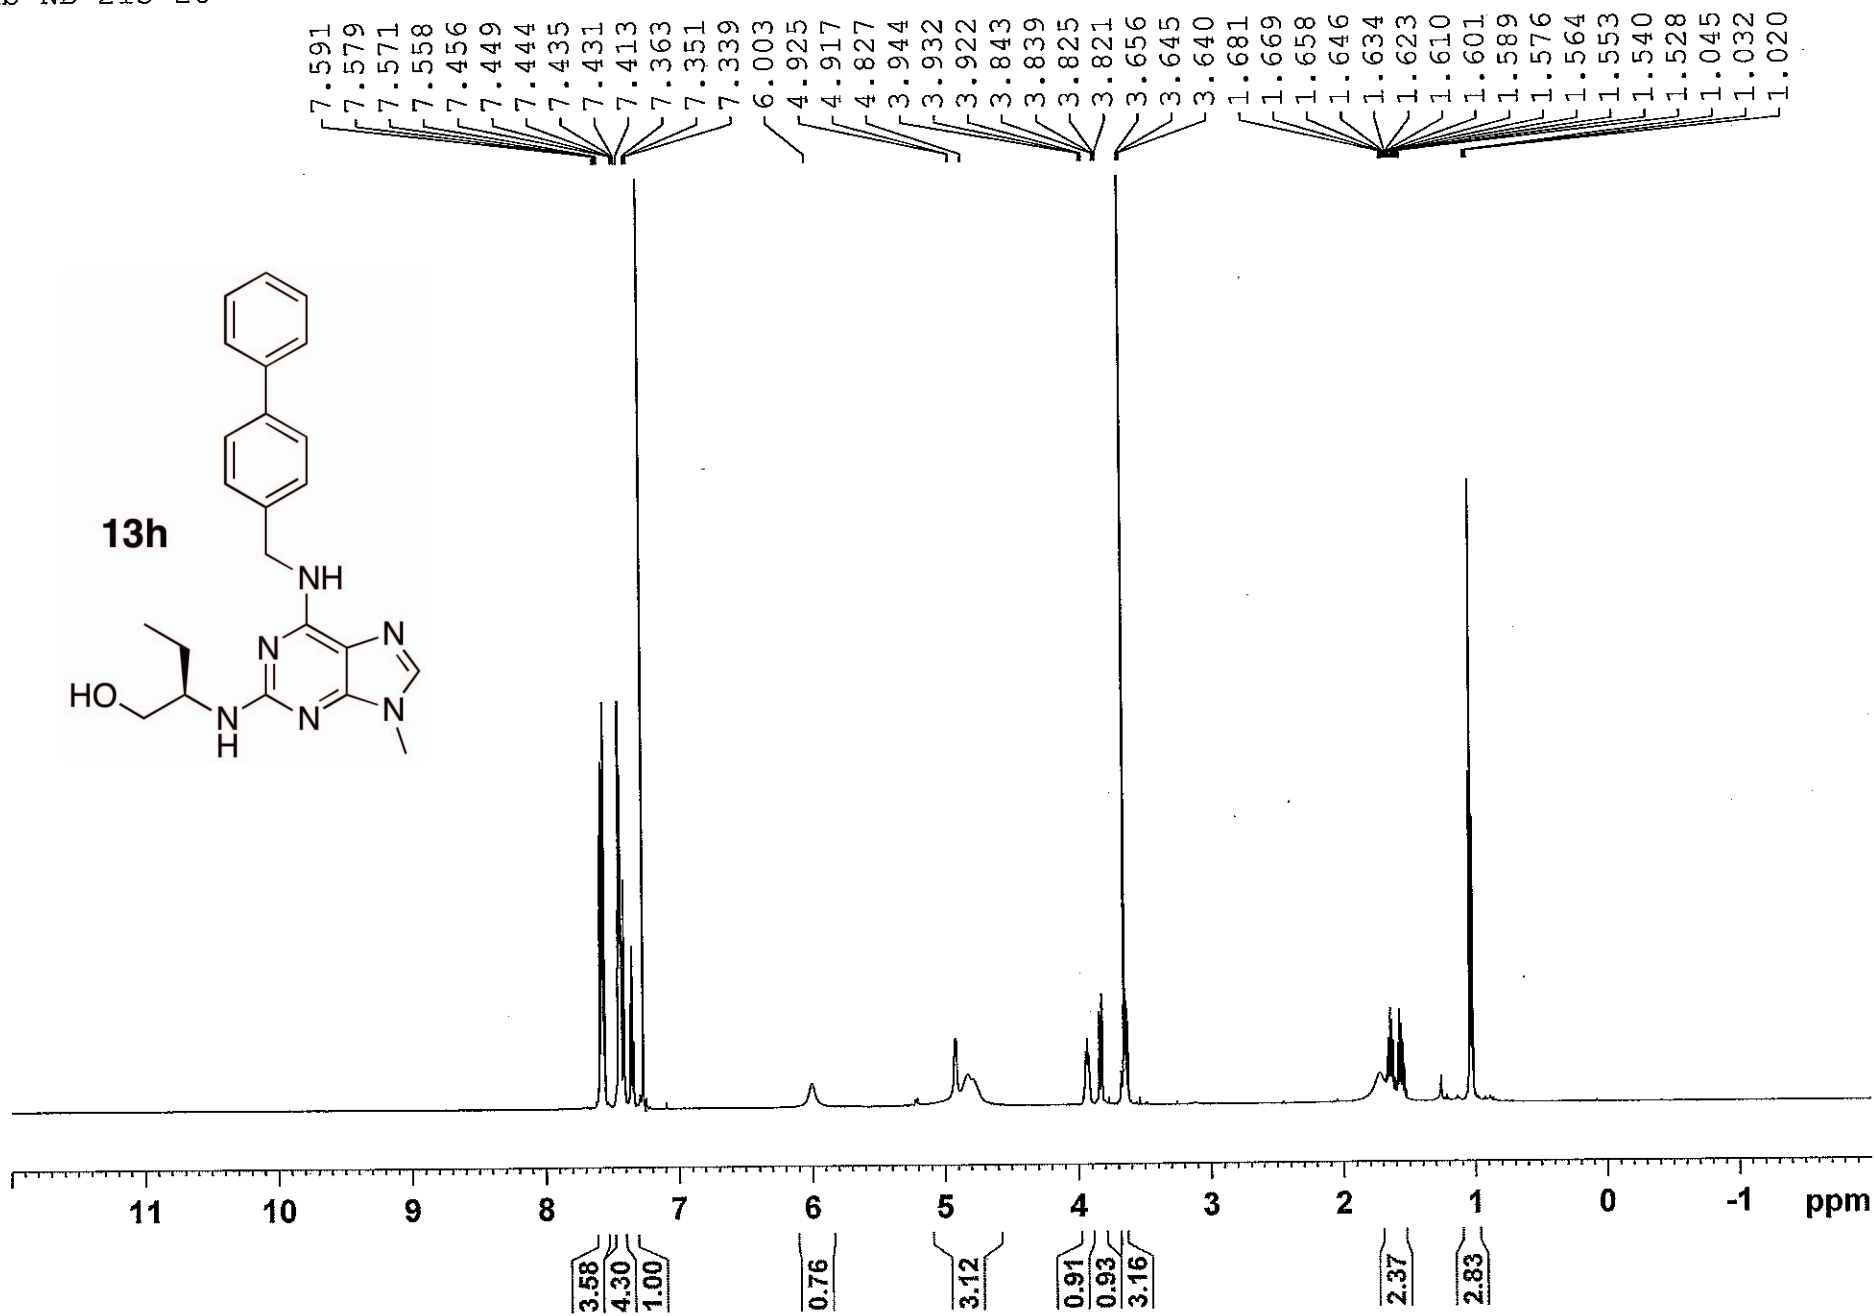

kb-NB-213-20

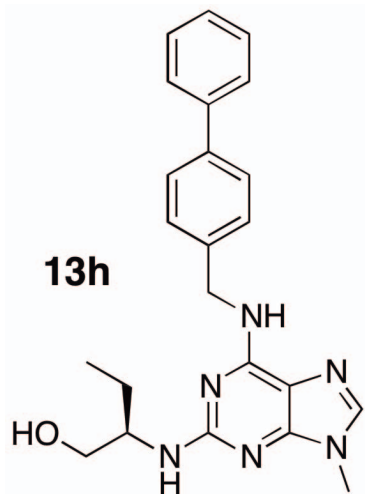

— 160.28  
— 154.79  
— 151.04  
— 140.75  
— 140.23  
— 137.76  
— 137.61  
— 128.74  
— 128.09  
— 127.25  
— 127.02  
— 114.17

— 68.19  
— 56.17  
— 44.06  
— 29.35  
— 24.99  
— 10.89

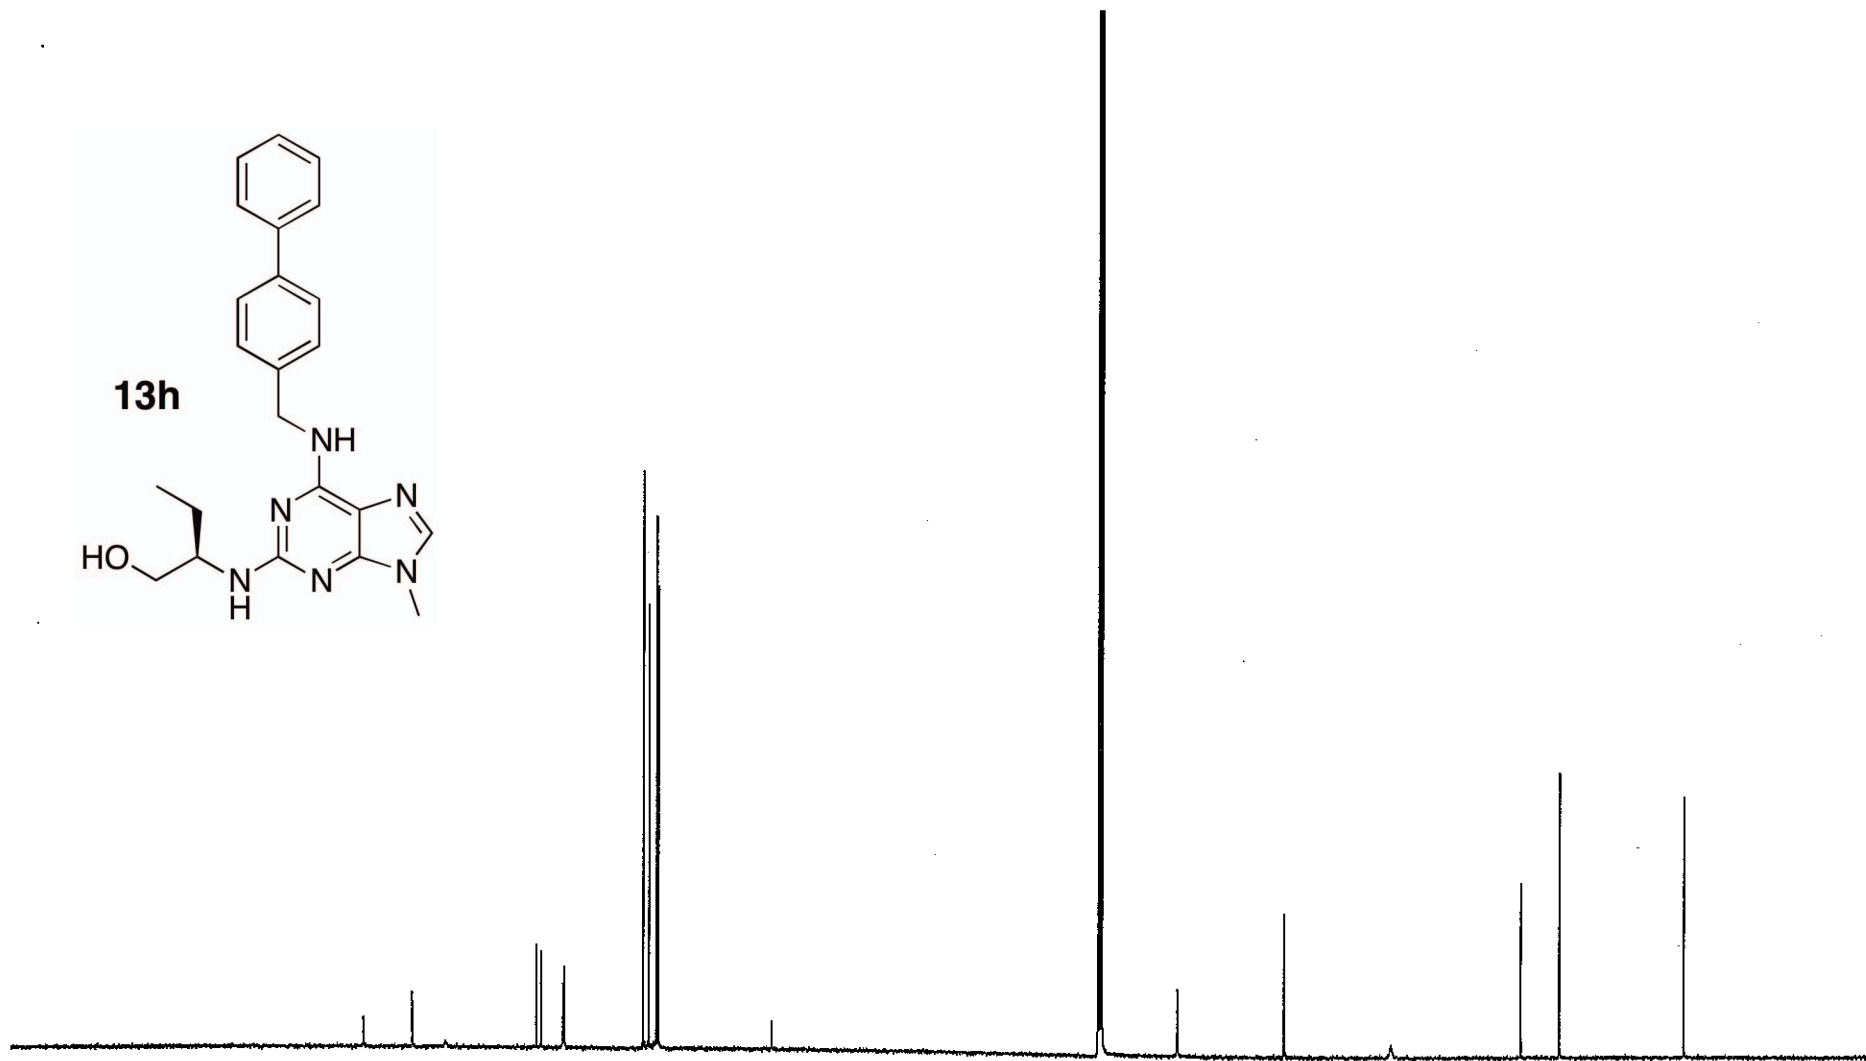

190 180 170 160 150 140 130 120 110 100 90 80 70 60 50 40 30 20 10 ppm

kb-NB-213-18 (calibrated)

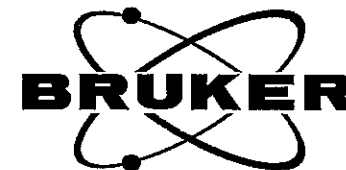

NAME kb-NB-213-18  
EXPNO 1  
PROCNO 1  
Date\_ 20090731  
Time\_ 14.00  
INSTRUM spect  
PROBHD 5 mm CPTCI 1H-  
PULPROG zg30  
TD 65536  
SOLVENT CDC13  
NS 16  
DS 2  
SWH 12376.237 Hz  
FIDRES 0.188846 Hz  
AQ 2.6477449 sec  
RG 25.4  
DW 40.400 usec  
DE 6.50 usec  
TE 298.0 K  
D1 1.00000000 sec  
TD0 1

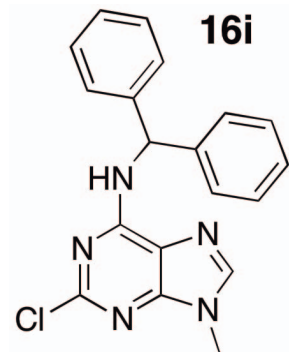

— 7.282  
— 6.751

— 3.692

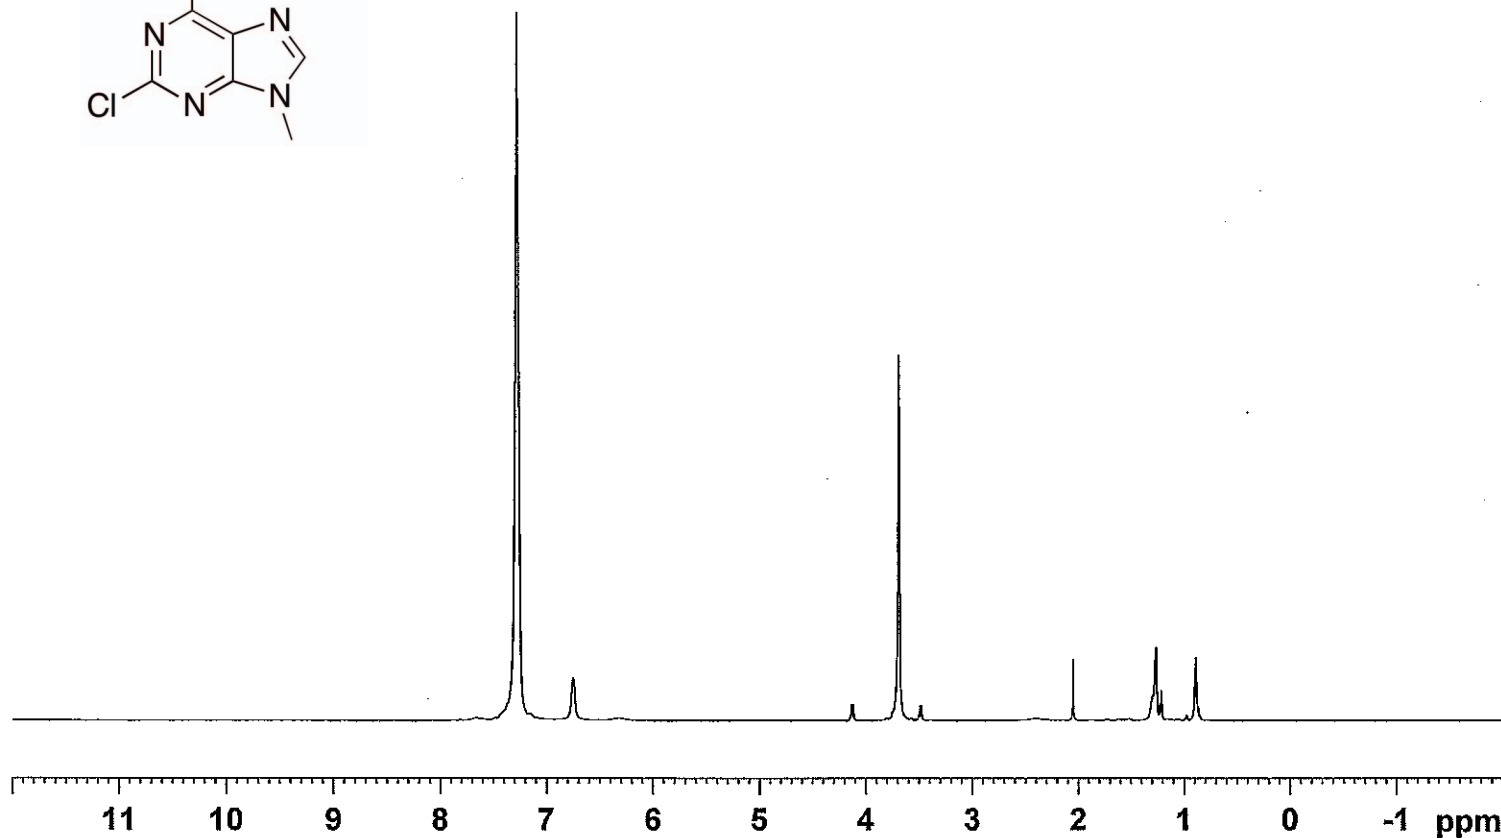

11.30  
0.90

3.00

==== CHANNEL f1 =====  
NUC1 1H  
P1 8.00 usec  
PL1 4.00 dB  
PL1W 7.00000000 W  
SFO1 600.1337060 MHz  
SI 32768  
SF 600.1300042 MHz  
WDW EM  
SSB 0  
LB 0.30 Hz  
GB 0  
PC 1.00

kb-NB-213-18

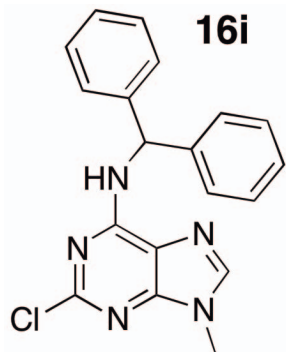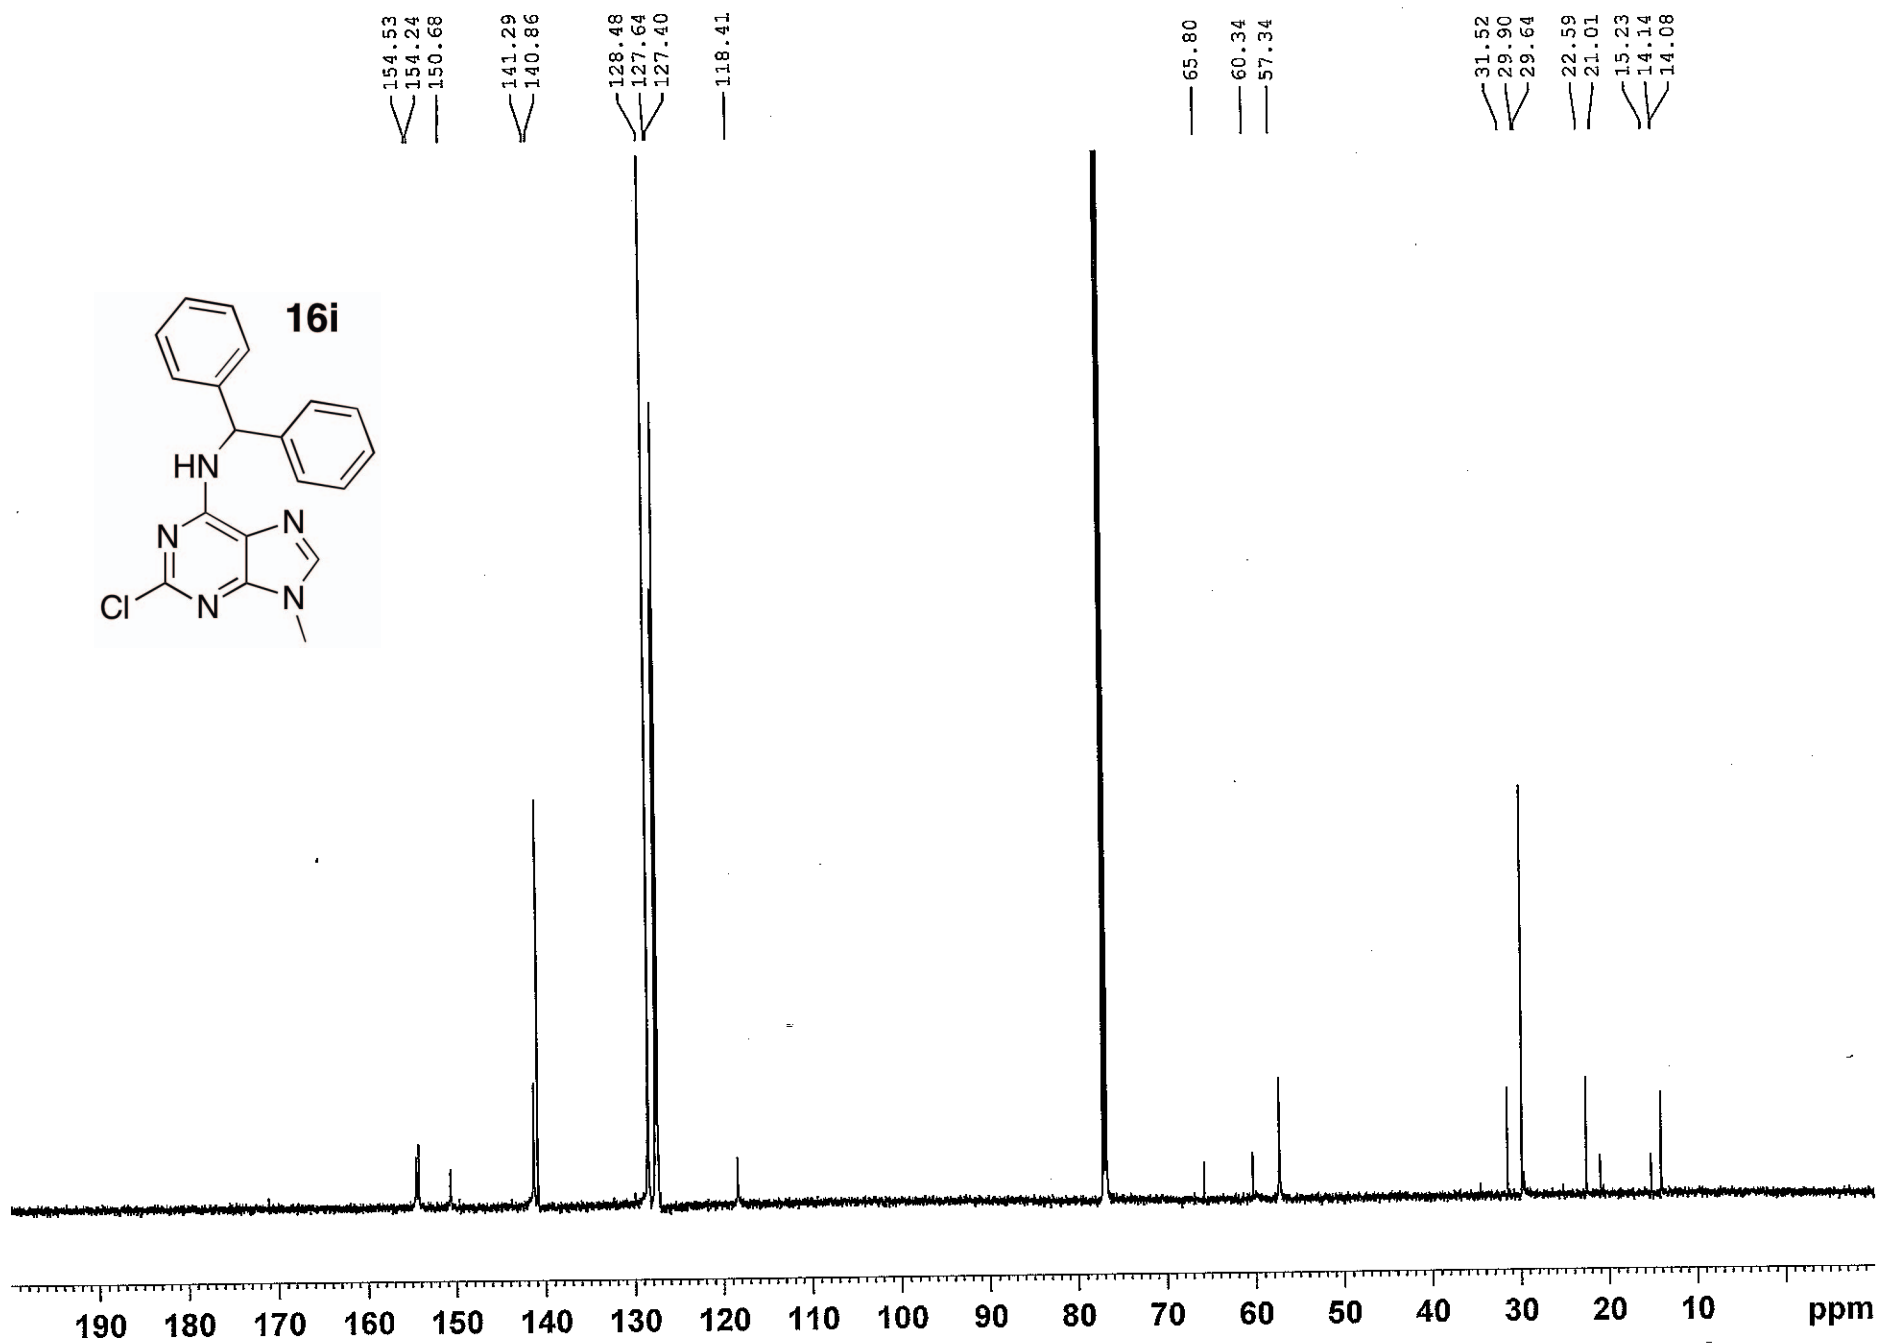

kb-NB-213-21

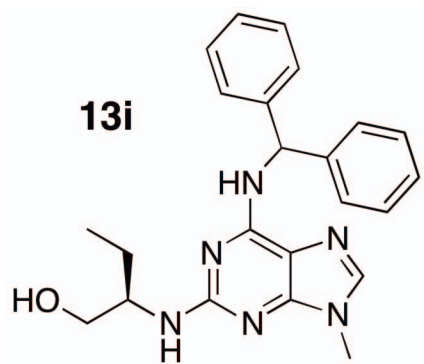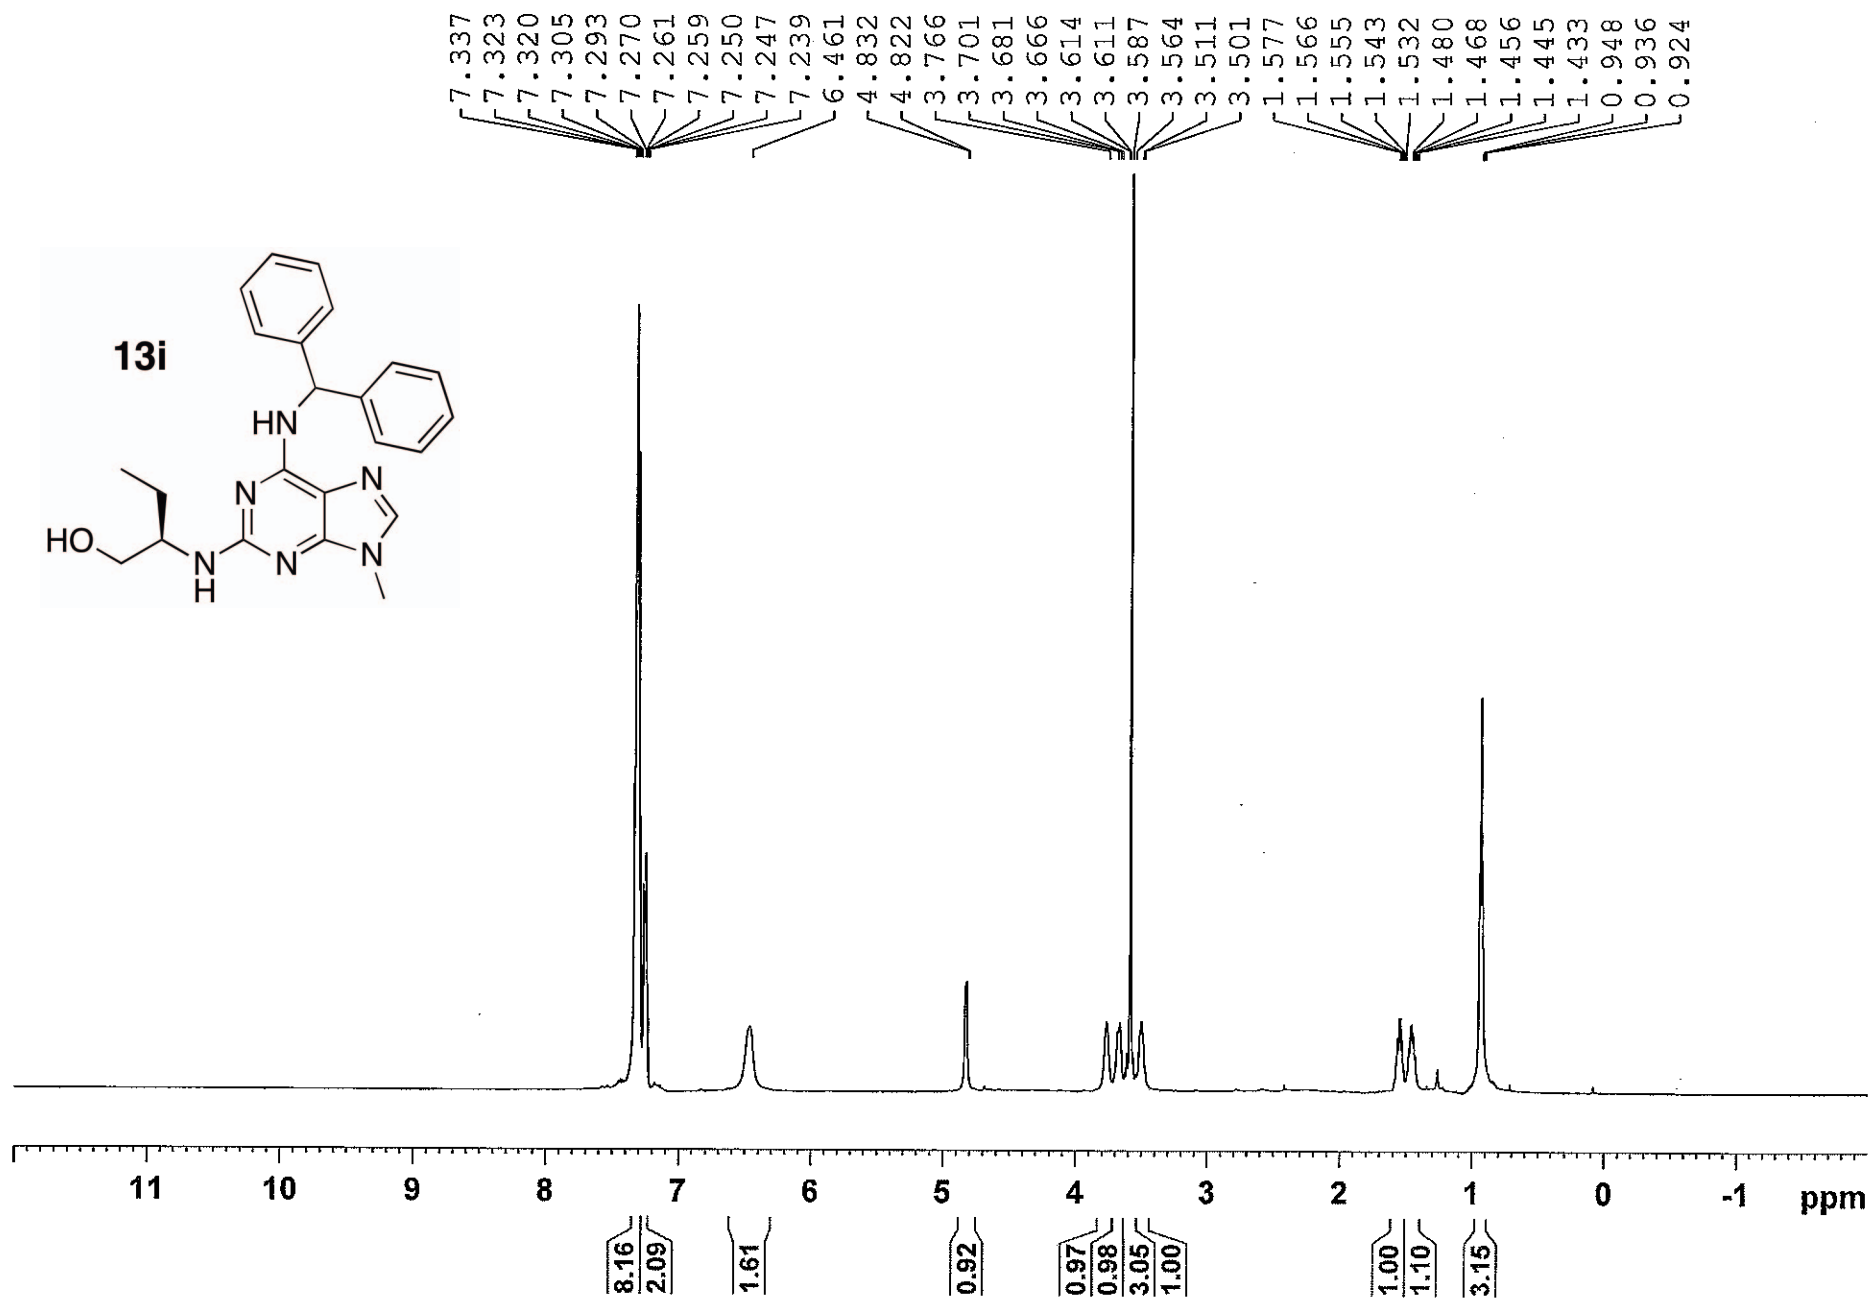

kb-NB-213-21

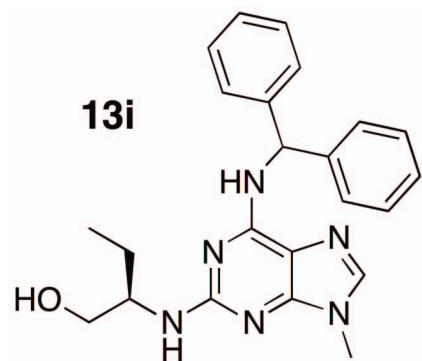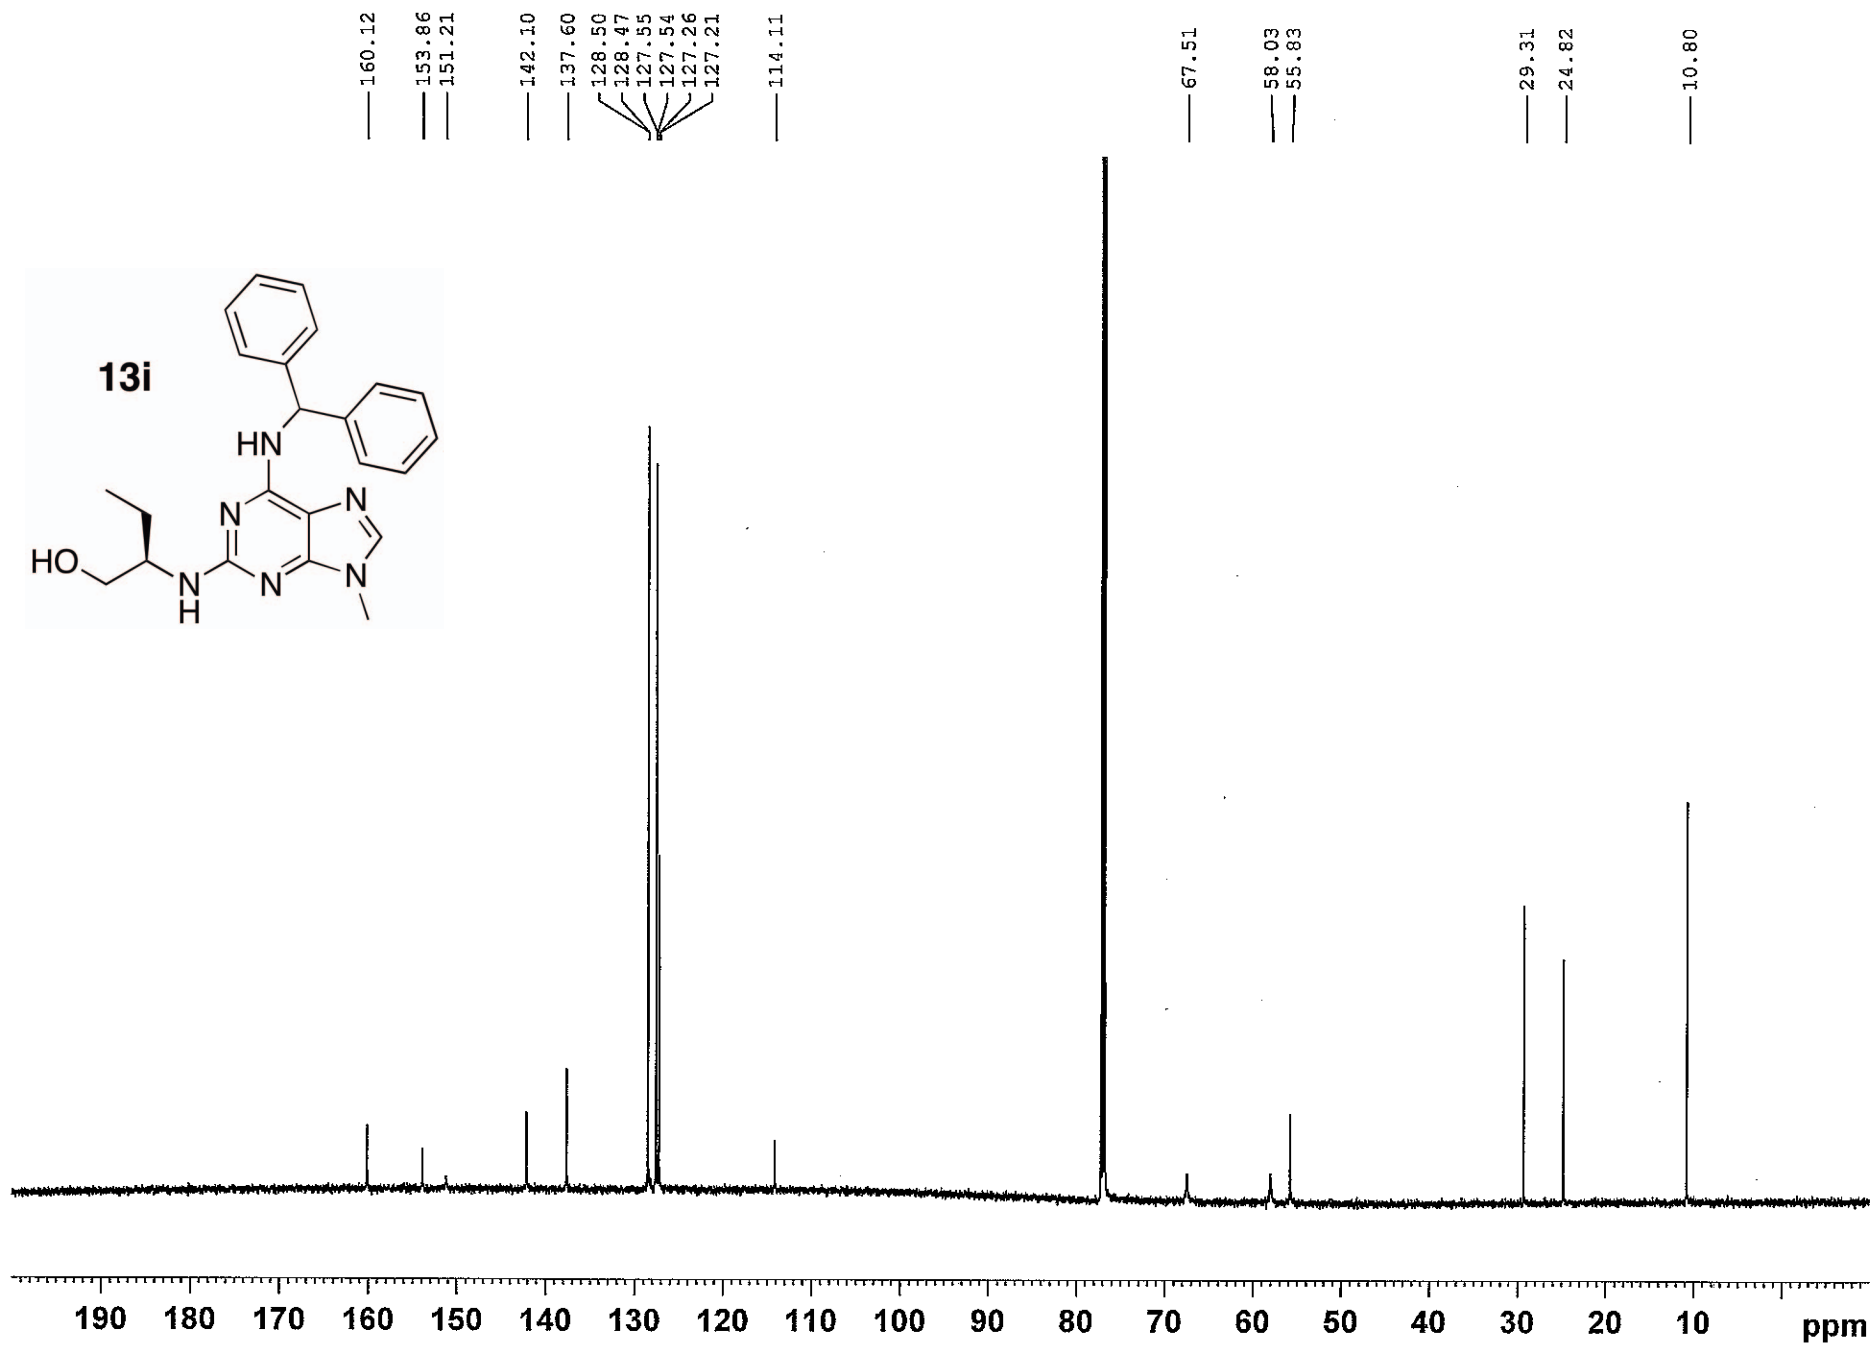



kb-NB-213-19

7.489  
7.292  
7.279  
7.267  
7.224  
7.214  
7.202  
7.190  
6.407

3.876  
3.765  
2.983  
2.971  
2.960

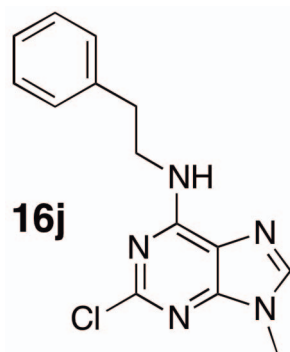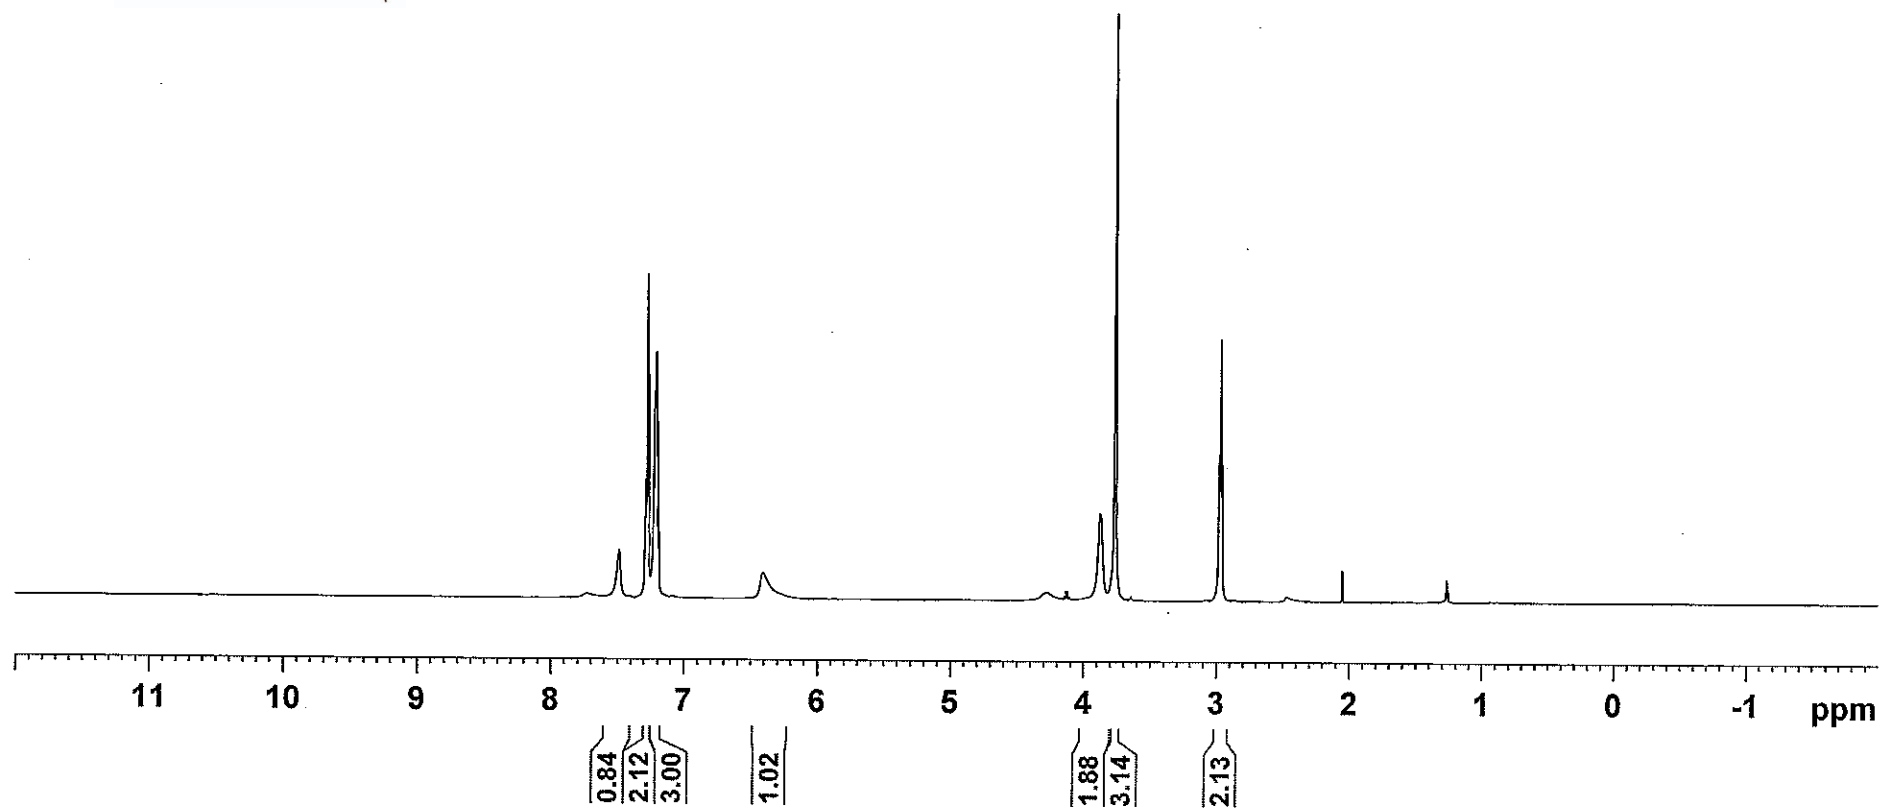

kb-NB-213-19

155.12  
154.57  
150.33

140.45  
138.65

128.76  
128.51  
126.42

118.51

41.87

35.48

29.88

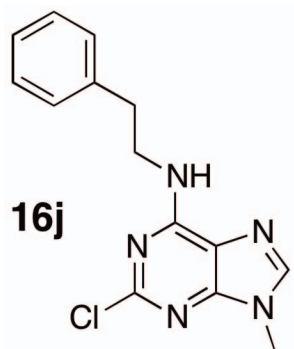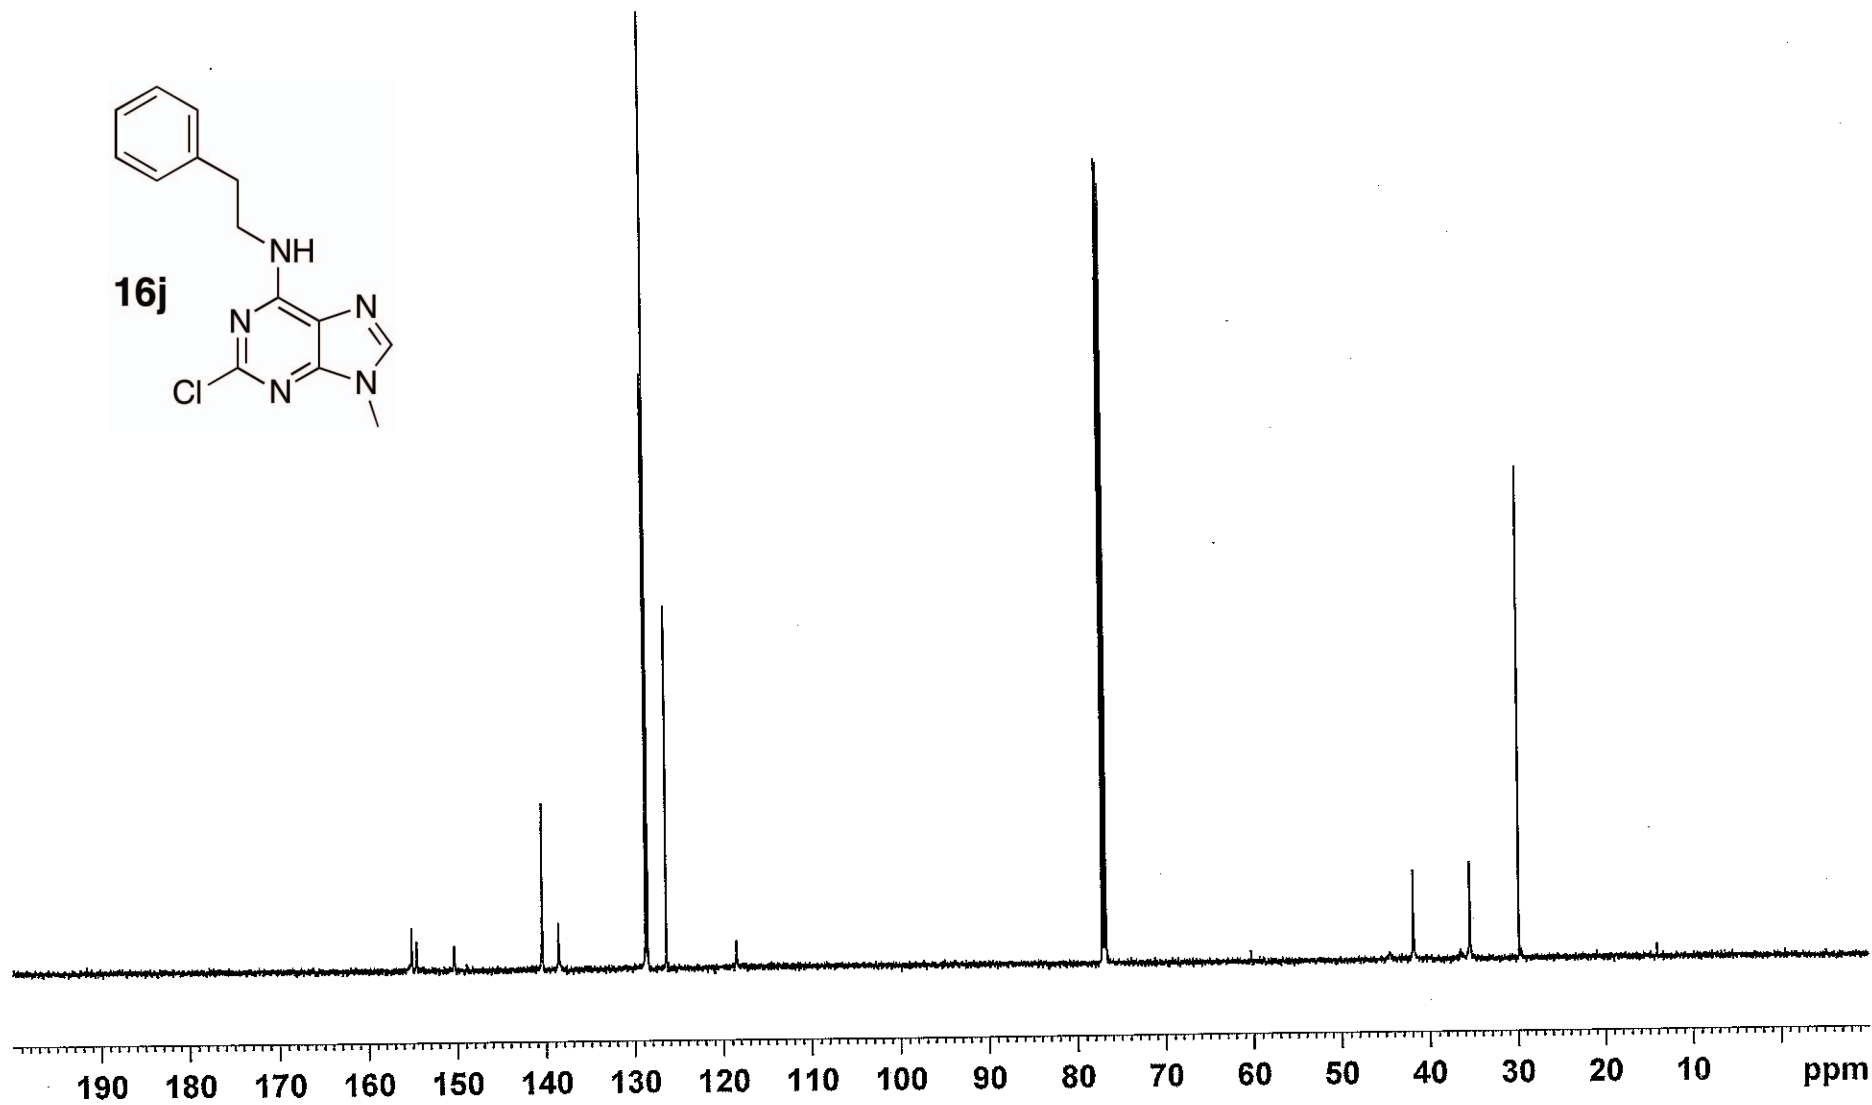

kb-NB-213-21

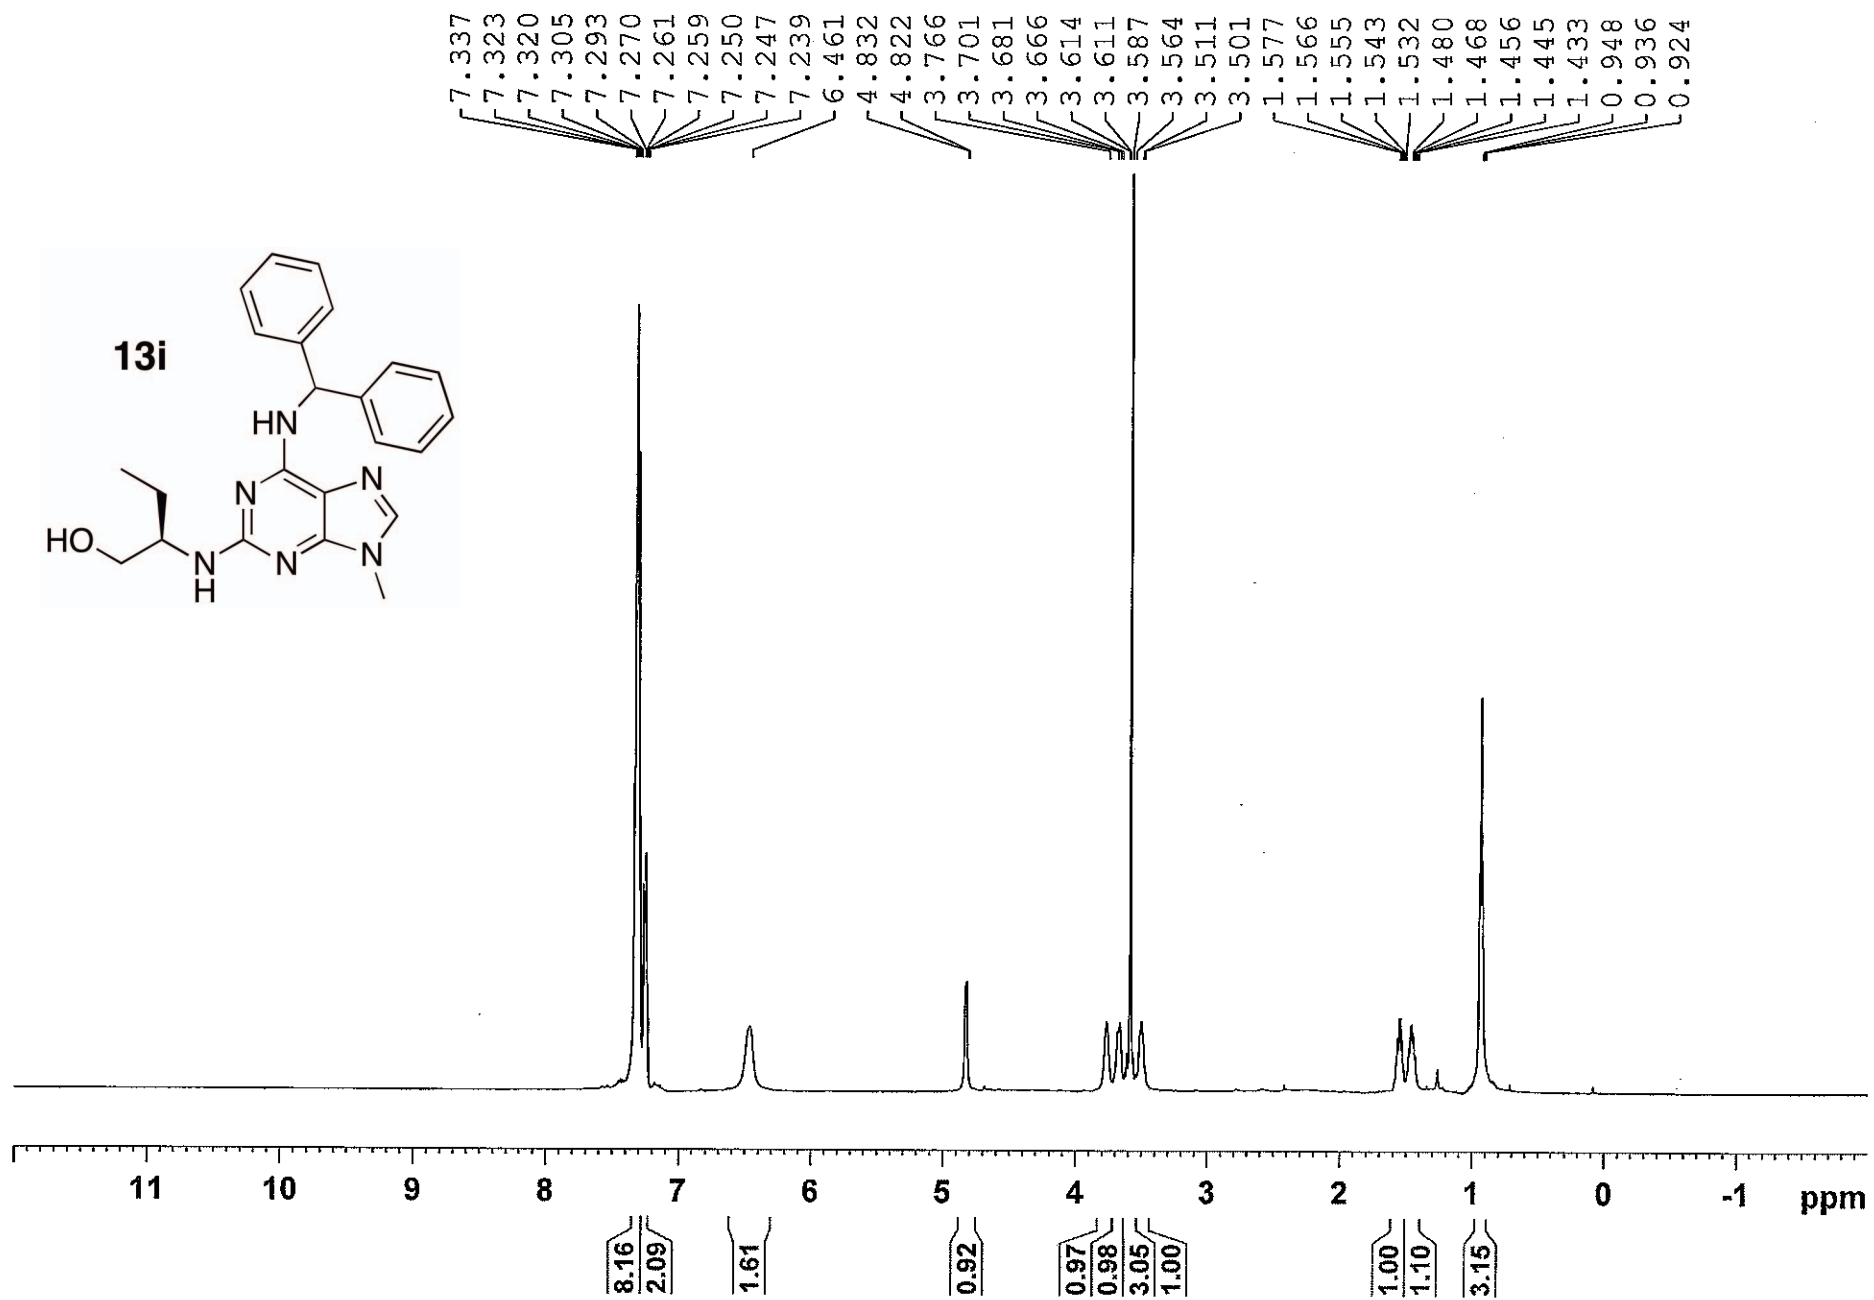

kb-NB-213-22

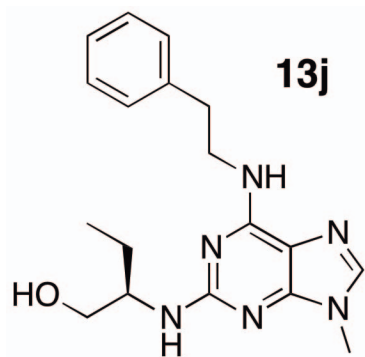

— 160.29  
— 155.31  
— 154.87  
— 150.85

— 138.97  
— 137.46

— 128.78  
— 128.69  
— 128.56  
— 126.40

— 114.17

— 68.32

— 56.24

— 41.68

— 35.90

— 29.33

— 25.03

— 10.91

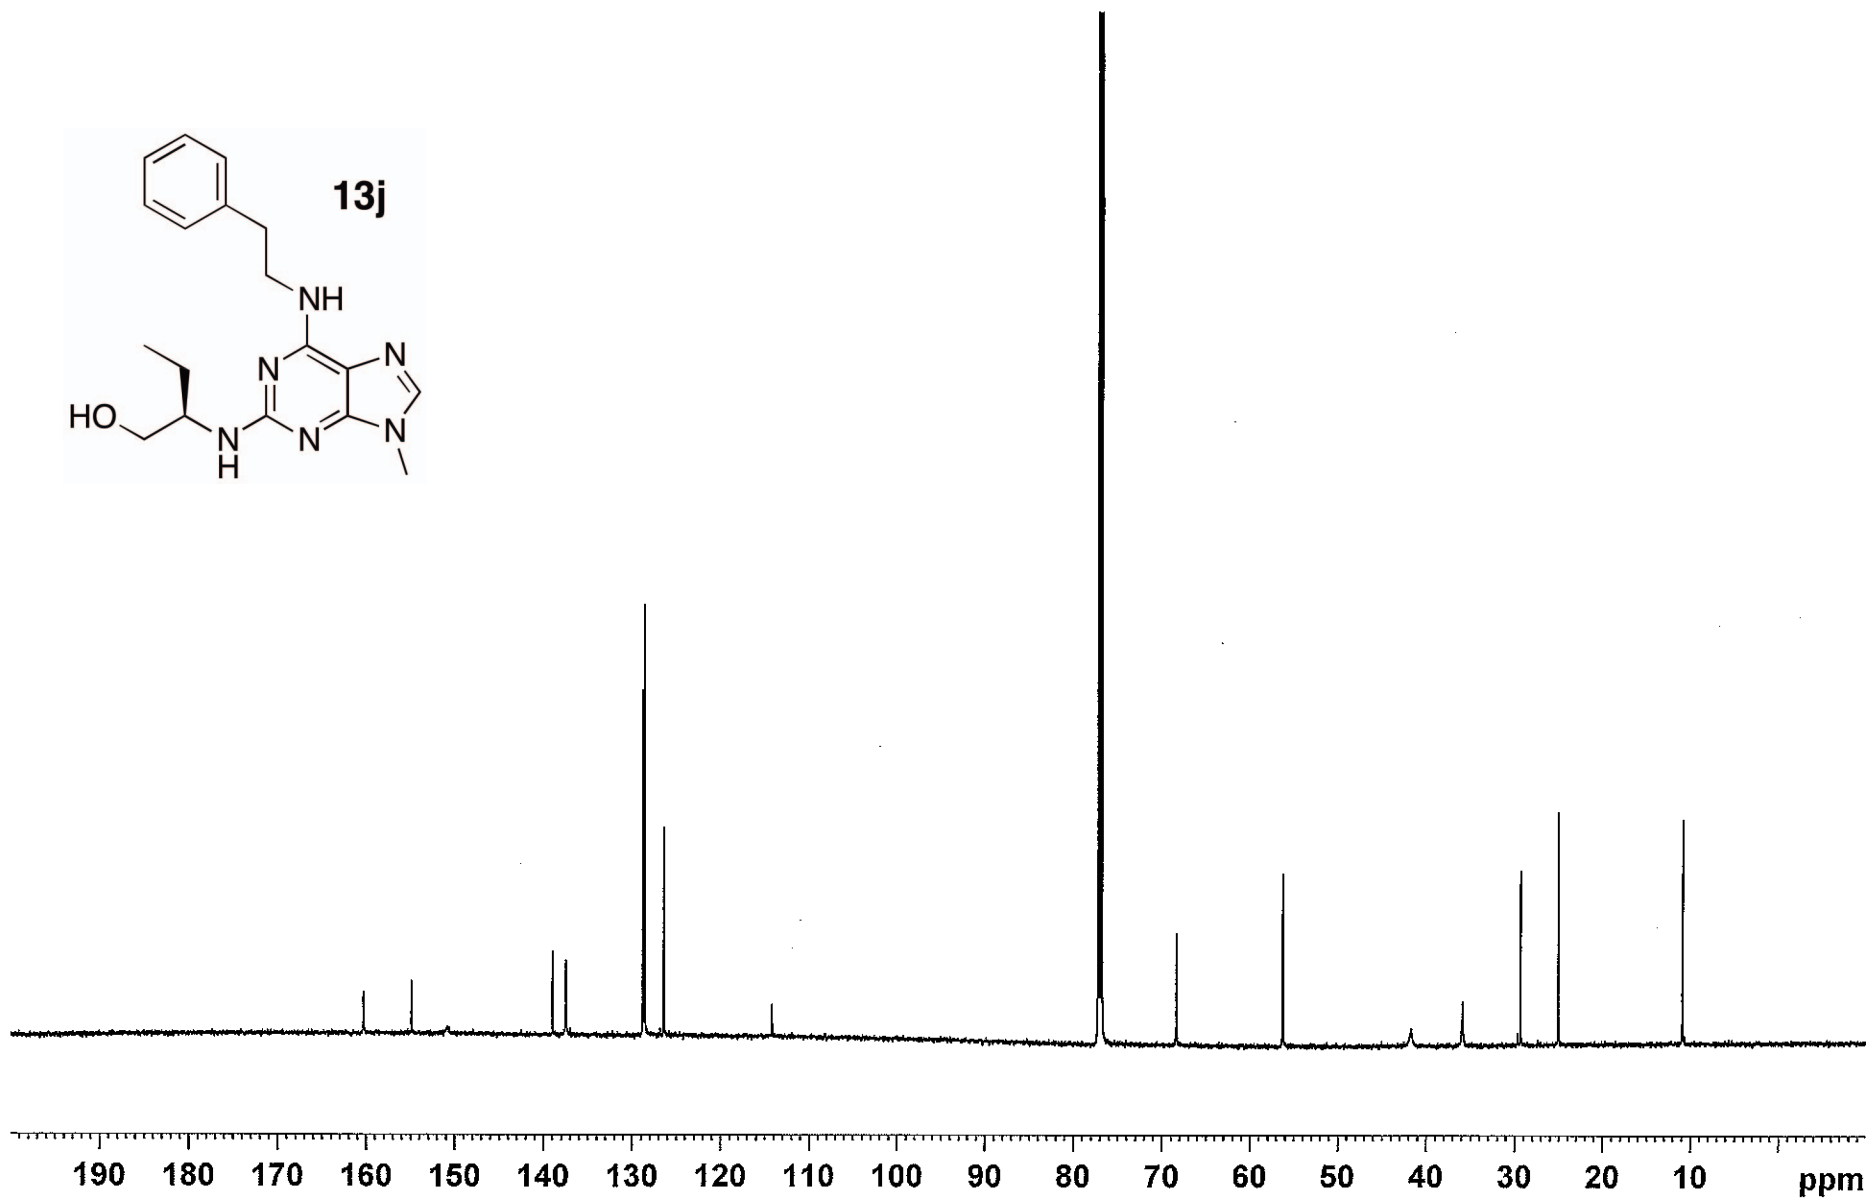

kb-NB-213-23

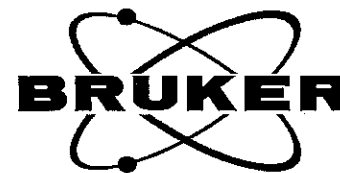

NAME kb-NB-213-23  
EXPNO 3  
PROCNO 1  
Date\_ 20090805  
Time\_ 21.12  
INSTRUM spect  
PROBHD 5 mm CPTCI 1H-  
PULPROG zg30  
TD 65536  
SOLVENT CDC13  
NS 16  
DS 2  
SWH 12376.237 Hz  
FIDRES 0.188846 Hz  
AQ 2.6477449 sec  
RG 90.5  
DW 40.400 usec  
DE 6.50 usec  
TE 298.0 K  
D1 1.00000000 sec  
TD0 1

===== CHANNEL f1 =====  
NUC1 1H  
P1 8.00 usec  
PL1 4.00 dB  
PL1W 7.00000000 W  
SFO1 600.1337060 MHz  
SI 32768  
SF 600.1320466 MHz  
WDW EM  
SSB 0  
LB 0.30 Hz  
GB 0  
PC 1.00

7.721  
7.401  
7.389  
7.366  
7.363  
7.358  
7.345  
7.333  
7.298  
7.286  
7.274  
4.791  
3.831  
3.789

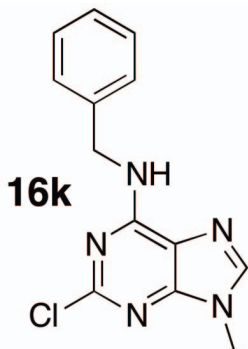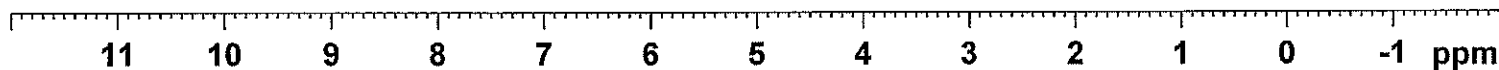

1.00  
1.92  
2.40  
1.04

1.89

3.21

kb-NB-213-23

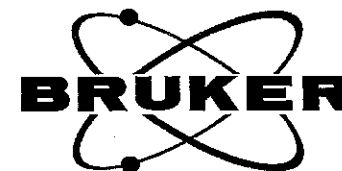

NAME kb-NB-213-23  
EXPNO 5  
PROCNO 1  
Date\_ 20090805  
Time\_ 22.12  
INSTRUM spect  
PROBHD 5 mm CPTCI 1H-  
PULPROG zgpg30  
TD 65536  
SOLVENT CDC13  
NS 630  
DS 4  
SWH 35971.223 Hz  
FIDRES 0.548877 Hz  
AQ 0.9110143 sec  
RG 13004  
DW 13.900 usec  
DE 6.50 usec  
TE 298.0 K  
D1 2.00000000 sec  
D11 0.03000000 sec  
TD0 1

==== CHANNEL f1 =====  
NUC1 13C  
P1 12.00 usec  
PL1 -0.70 dB  
PL1W 82.63385773 W  
SFO1 150.9178988 MHz

==== CHANNEL f2 =====  
CPDPRG2 waltz16  
NUC2 1H  
PCPD2 80.00 usec  
PL2 4.00 dB  
PL12 24.00 dB  
PL13 27.00 dB  
PL2W 7.00000000 W  
PL12W 0.07000000 W  
PL13W 0.03508311 W  
SFO2 600.1324005 MHz  
SI 32768  
SF 150.9033543 MHz  
WDW EM  
SSB 0  
LB 1.00 Hz  
GB 0  
PC 1.40

154.73  
154.53  
150.09  
140.47  
137.60  
128.43  
127.74  
127.35  
117.80  
60.46  
49.18  
49.04  
48.89  
48.75  
48.61  
48.47  
48.32  
44.40  
29.80

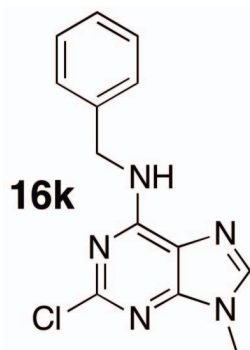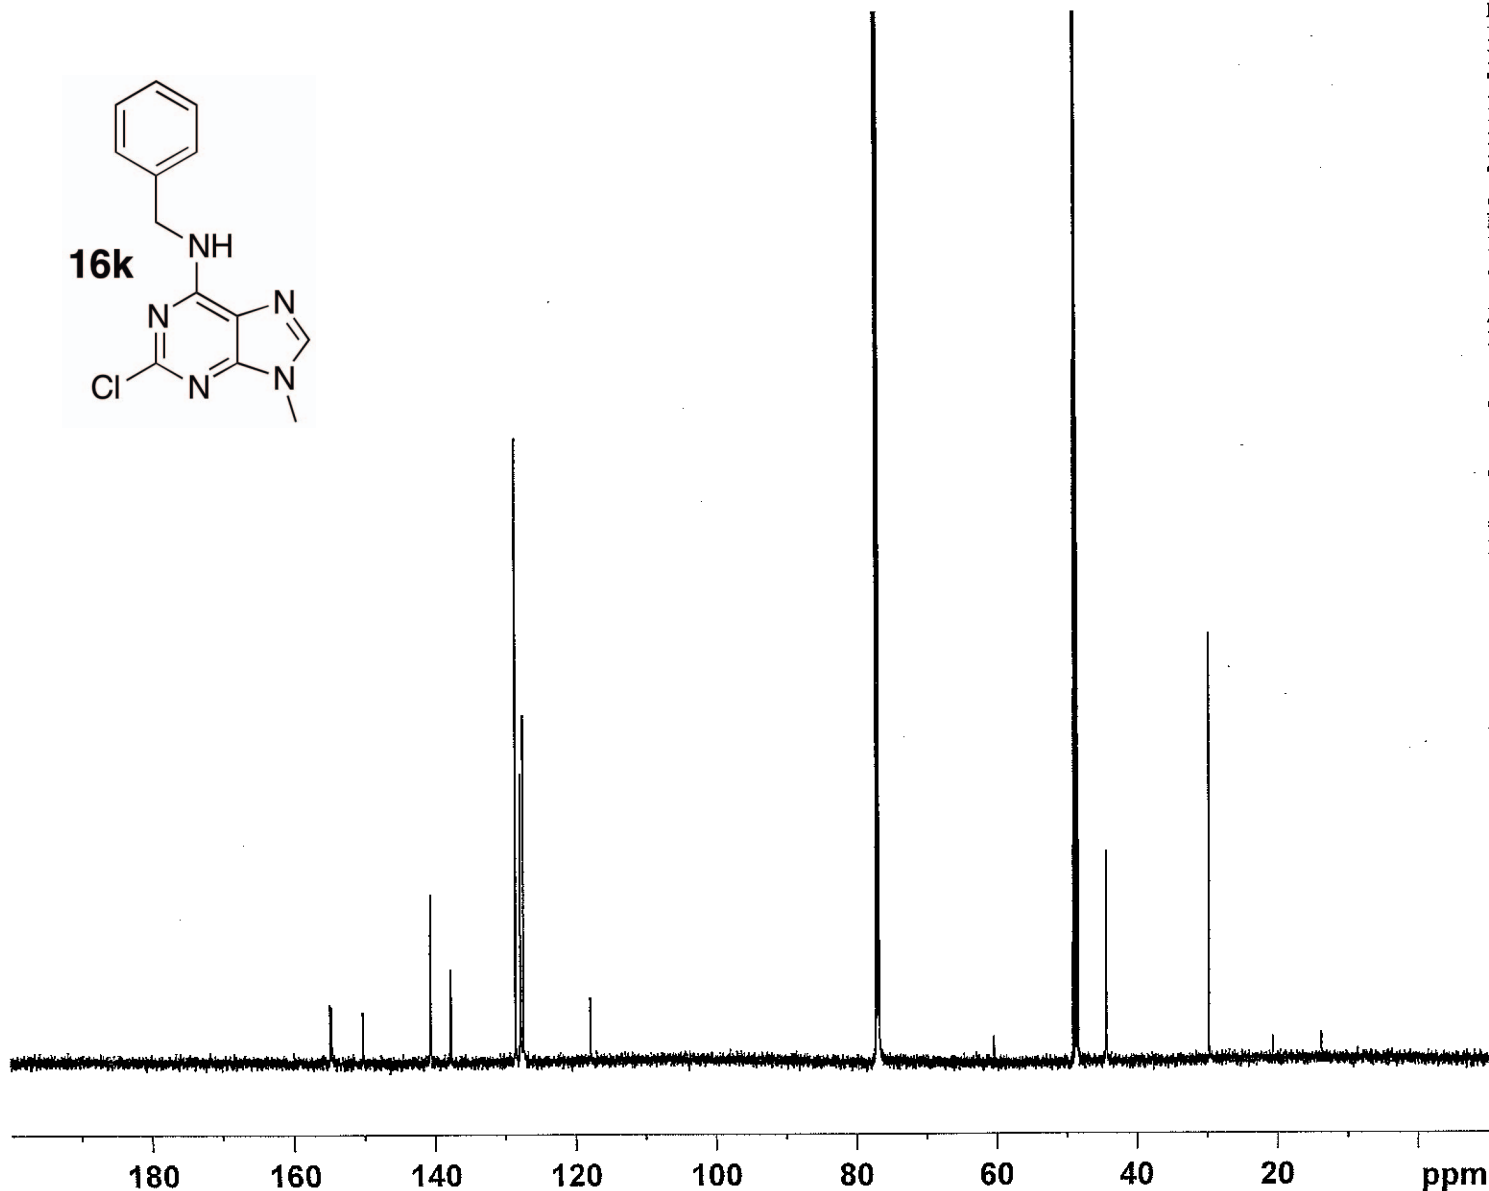

kb-NB-213-26

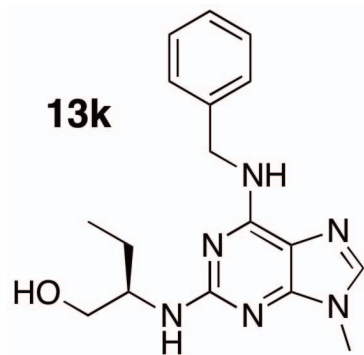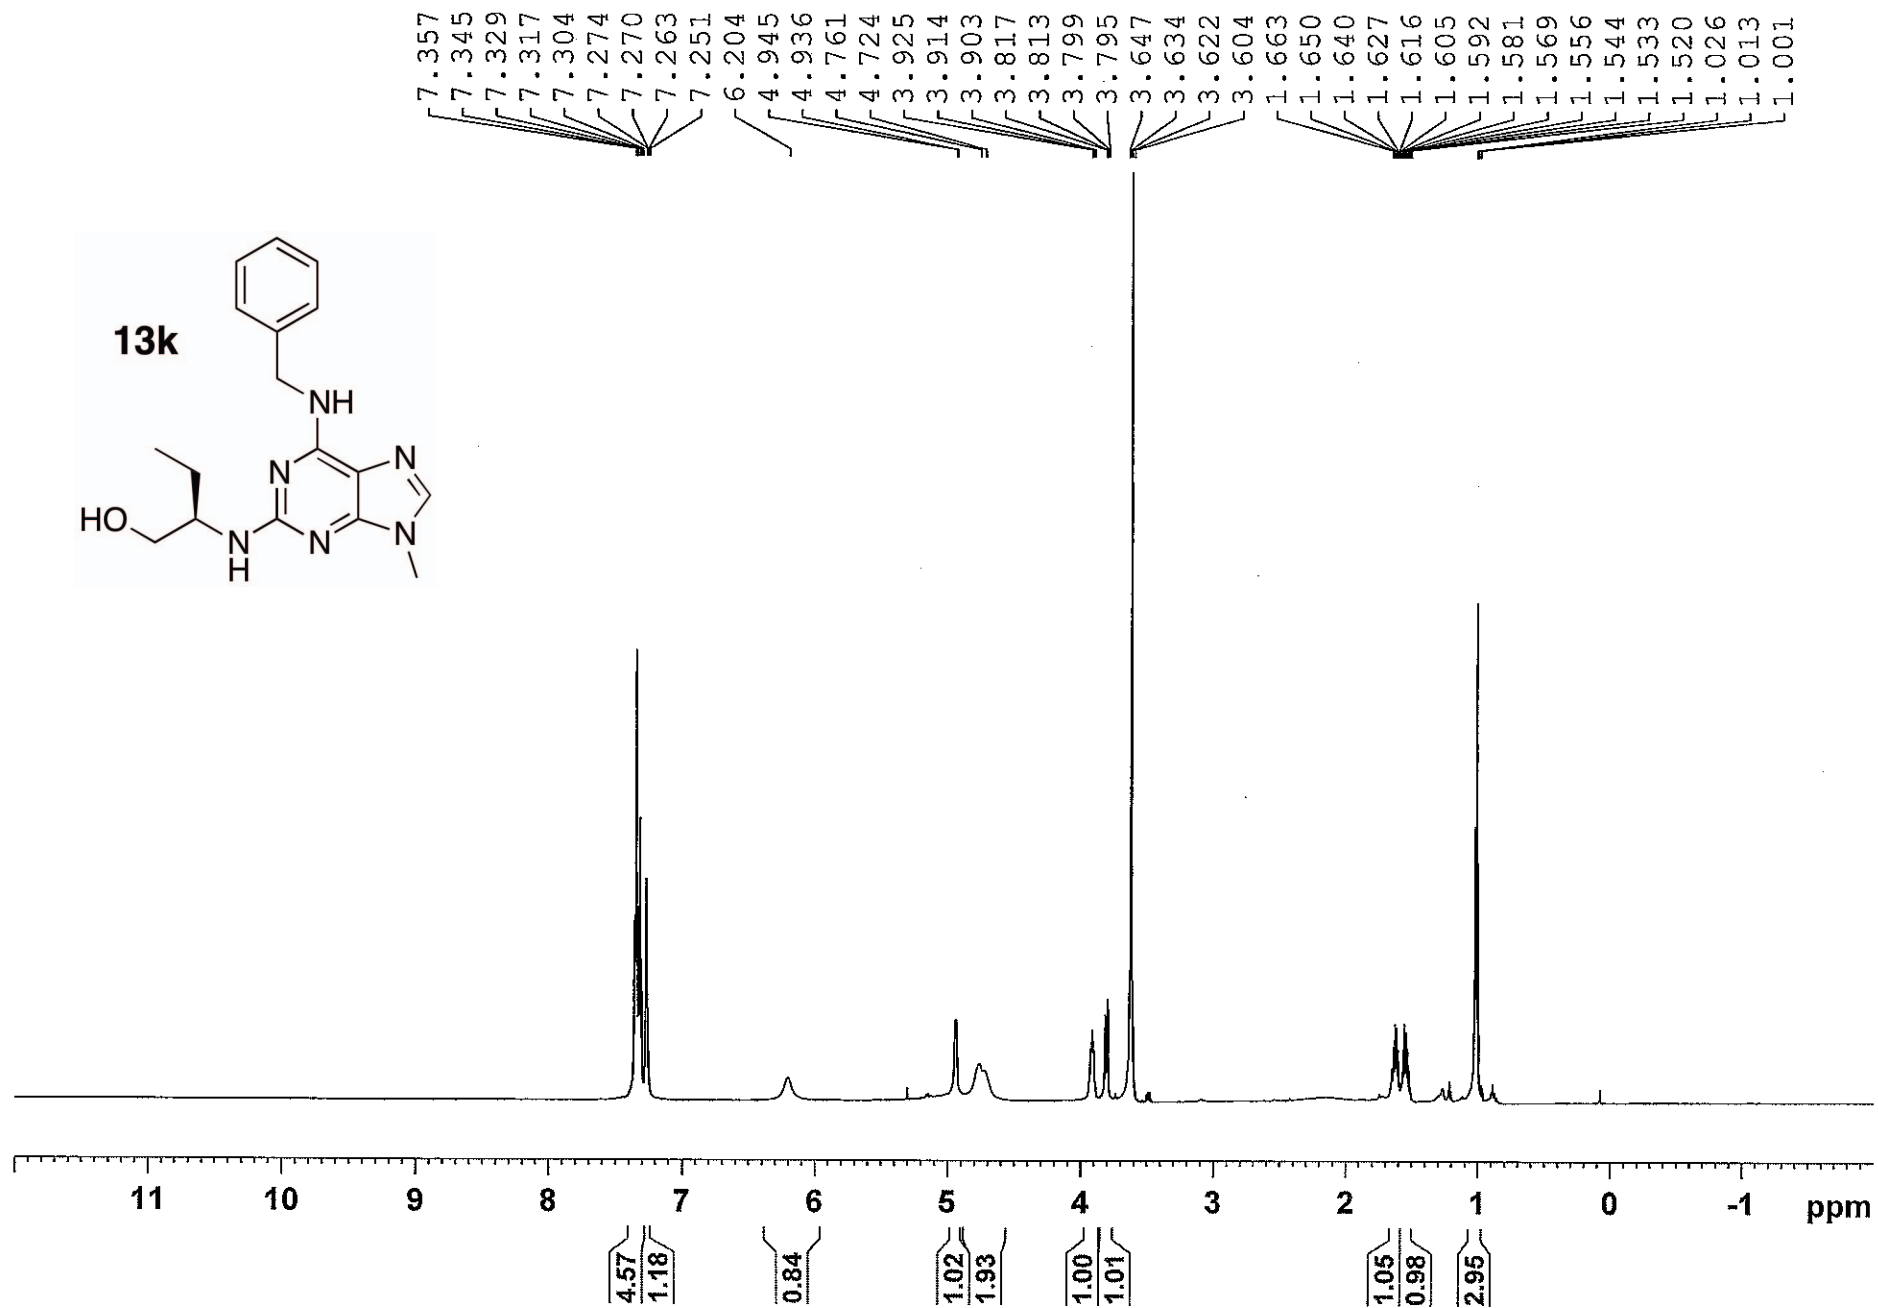

kb-NB-213-26

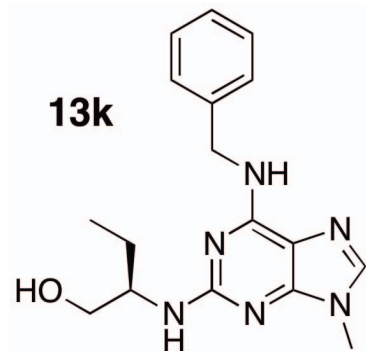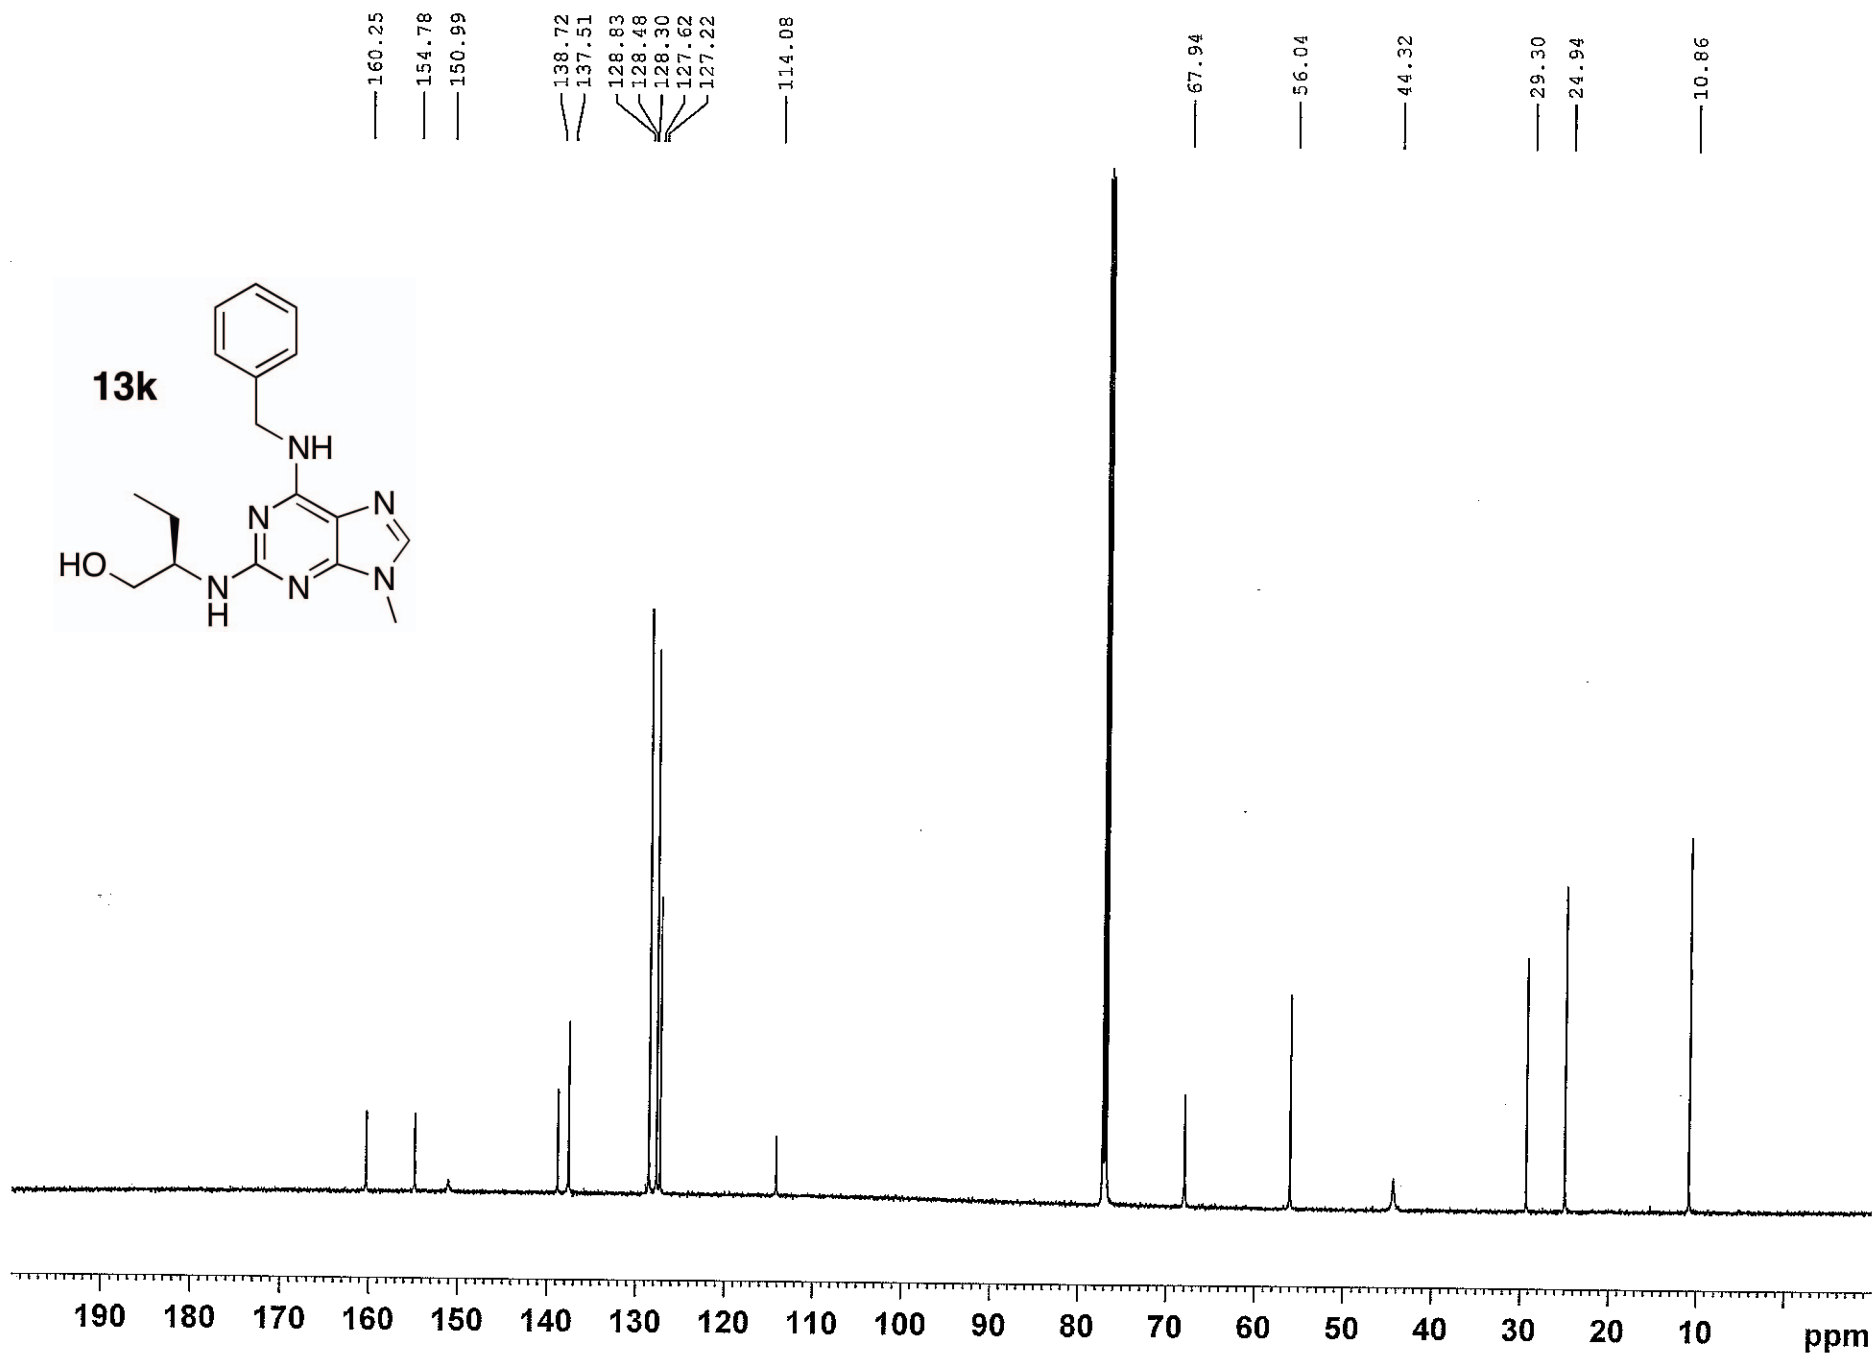



kb-NB-213-24

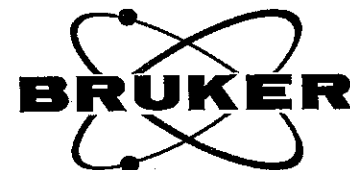

NAME kb-NB-213-24  
EXPNO 1  
PROCNO 1  
Date\_ 20090805  
Time\_ 19.43  
INSTRUM spect  
PROBHD 5 mm CPTCI 1H-  
PULPROG zg30  
TD 65536  
SOLVENT CDCl3  
NS 16  
DS 2  
SWH 12376.237 Hz  
FIDRES 0.188846 Hz  
AQ 2.6477449 sec  
RG 128  
DW 40.400 usec  
DE 6.50 usec  
TE 298.0 K  
D1 1.00000000 sec  
TD0 1

===== CHANNEL f1 =====  
NUC1 1H  
P1 8.00 usec  
PL1 4.00 dB  
PL1W 7.00000000 W  
SFO1 600.1337060 MHz  
SI 32768  
SF 600.1300051 MHz  
WDW EM  
SSB 0  
LB 0.30 Hz  
GB 0  
PC 1.00

7.845  
7.777  
7.404  
7.269  
7.148

3.841

2.065

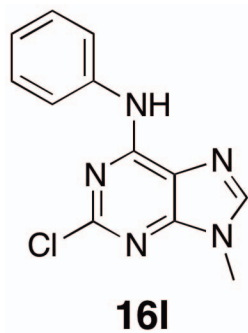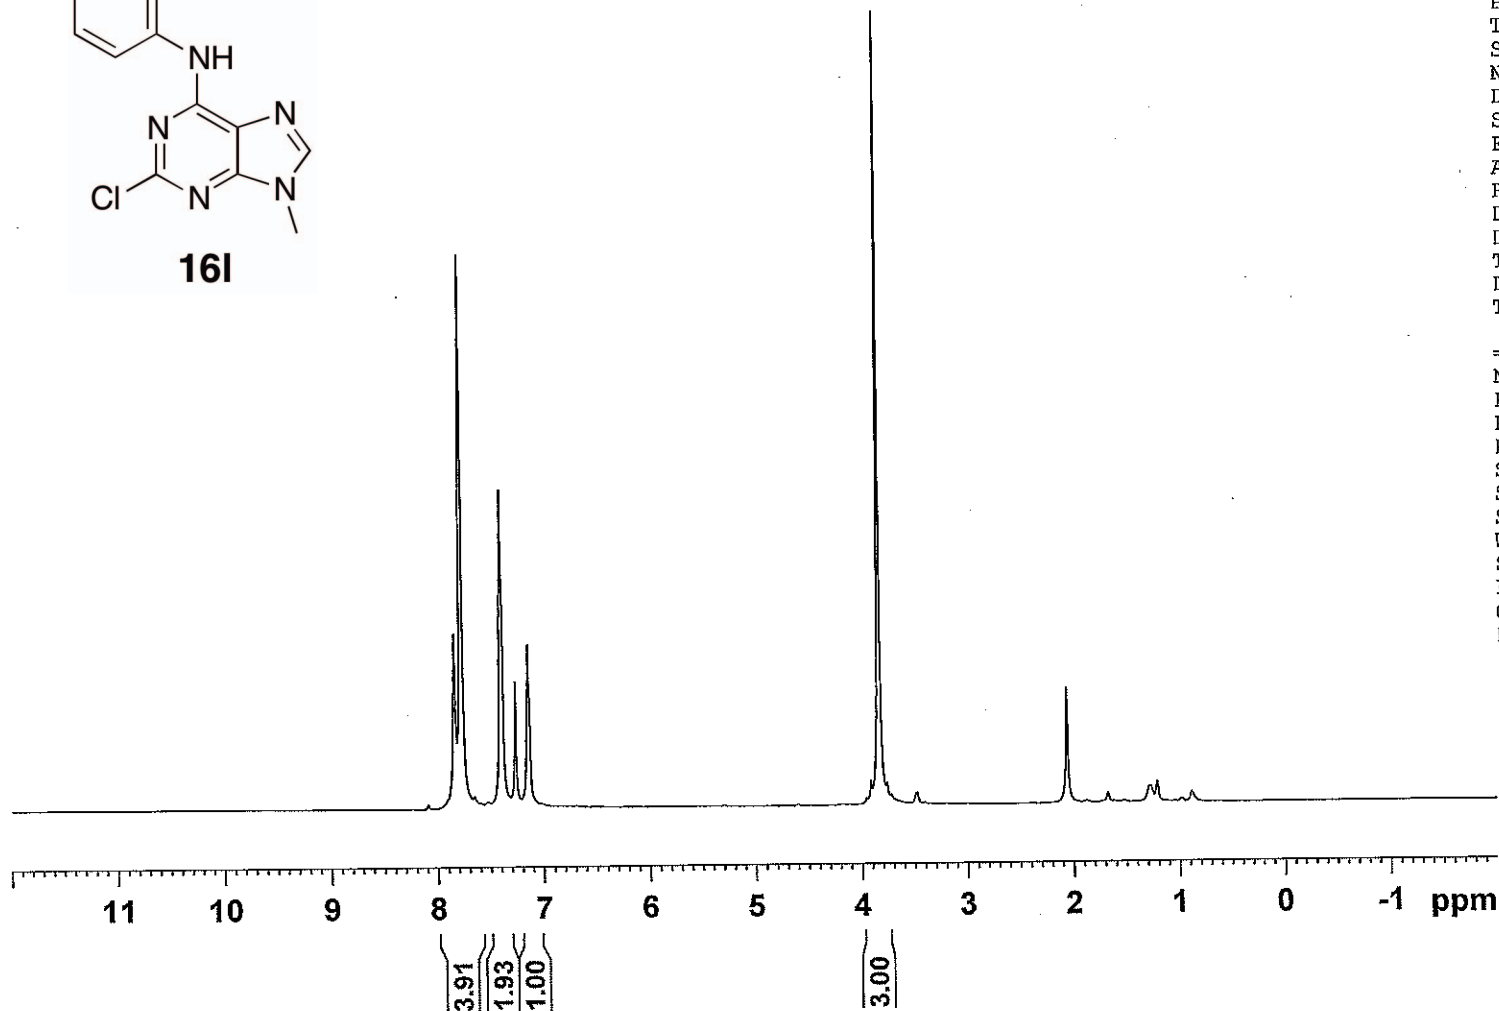

kb-NB-213-24

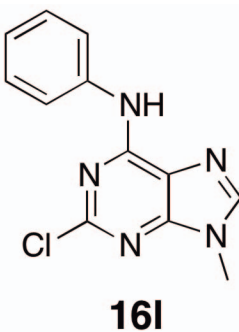

154.16  
152.27  
151.03  
141.40  
137.95  
129.11  
124.03  
120.14  
119.11

30.09

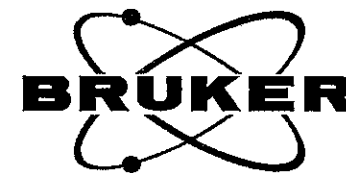

NAME kb-NB-213-24  
EXPNO 7  
PROCNO 1  
Date 20090806  
Time 0.09  
INSTRUM spect  
PROBHD 5 mm CPTCI 1H-  
PULPROG zgpg30  
TD 65536  
SOLVENT CDCl3  
NS 1024  
DS 4  
SWH 35971.223 Hz  
FIDRES 0.548877 Hz  
AQ 0.9110143 sec  
RG 16384  
DW 13.900 usec  
DE 6.50 usec  
TE 298.0 K  
D1 2.0000000 sec  
D11 0.0300000 sec  
TD0 1

===== CHANNEL f1 =====  
NUC1 13C  
P1 12.00 usec  
PL1 -0.70 dB  
PL1W 82.63385773 W  
SFO1 150.9178988 MHz

===== CHANNEL f2 =====  
CPDPRG2 waltz16  
NUC2 1H  
PCPD2 80.00 usec  
PL2 4.00 dB  
PL12 24.00 dB  
PL13 27.00 dB  
PL2W 7.00000000 W  
PL12W 0.07000000 W  
PL13W 0.03508311 W  
SFO2 600.1324005 MHz  
SI 32768  
SF 150.9028143 MHz  
WDW EM  
SSB 0  
LB 1.00 Hz  
GB 0  
PC 1.40

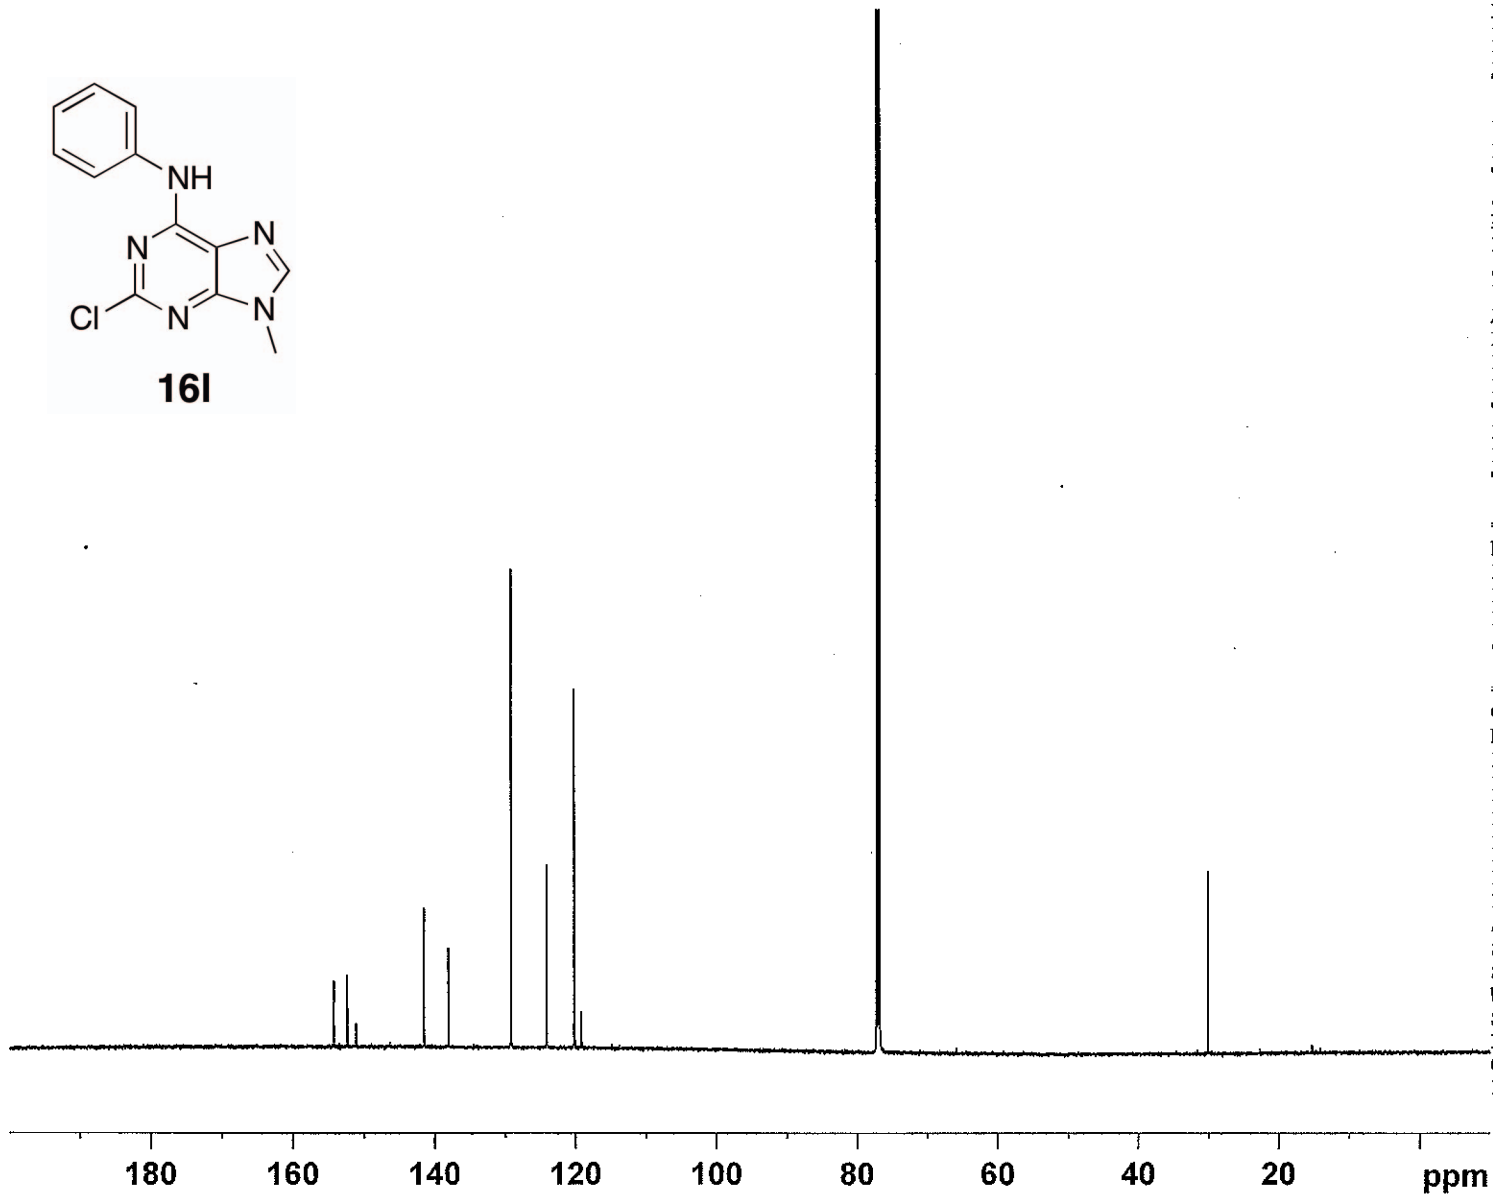

kb-NB-213-27

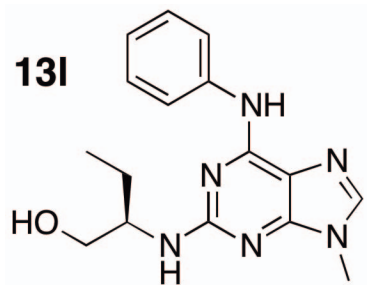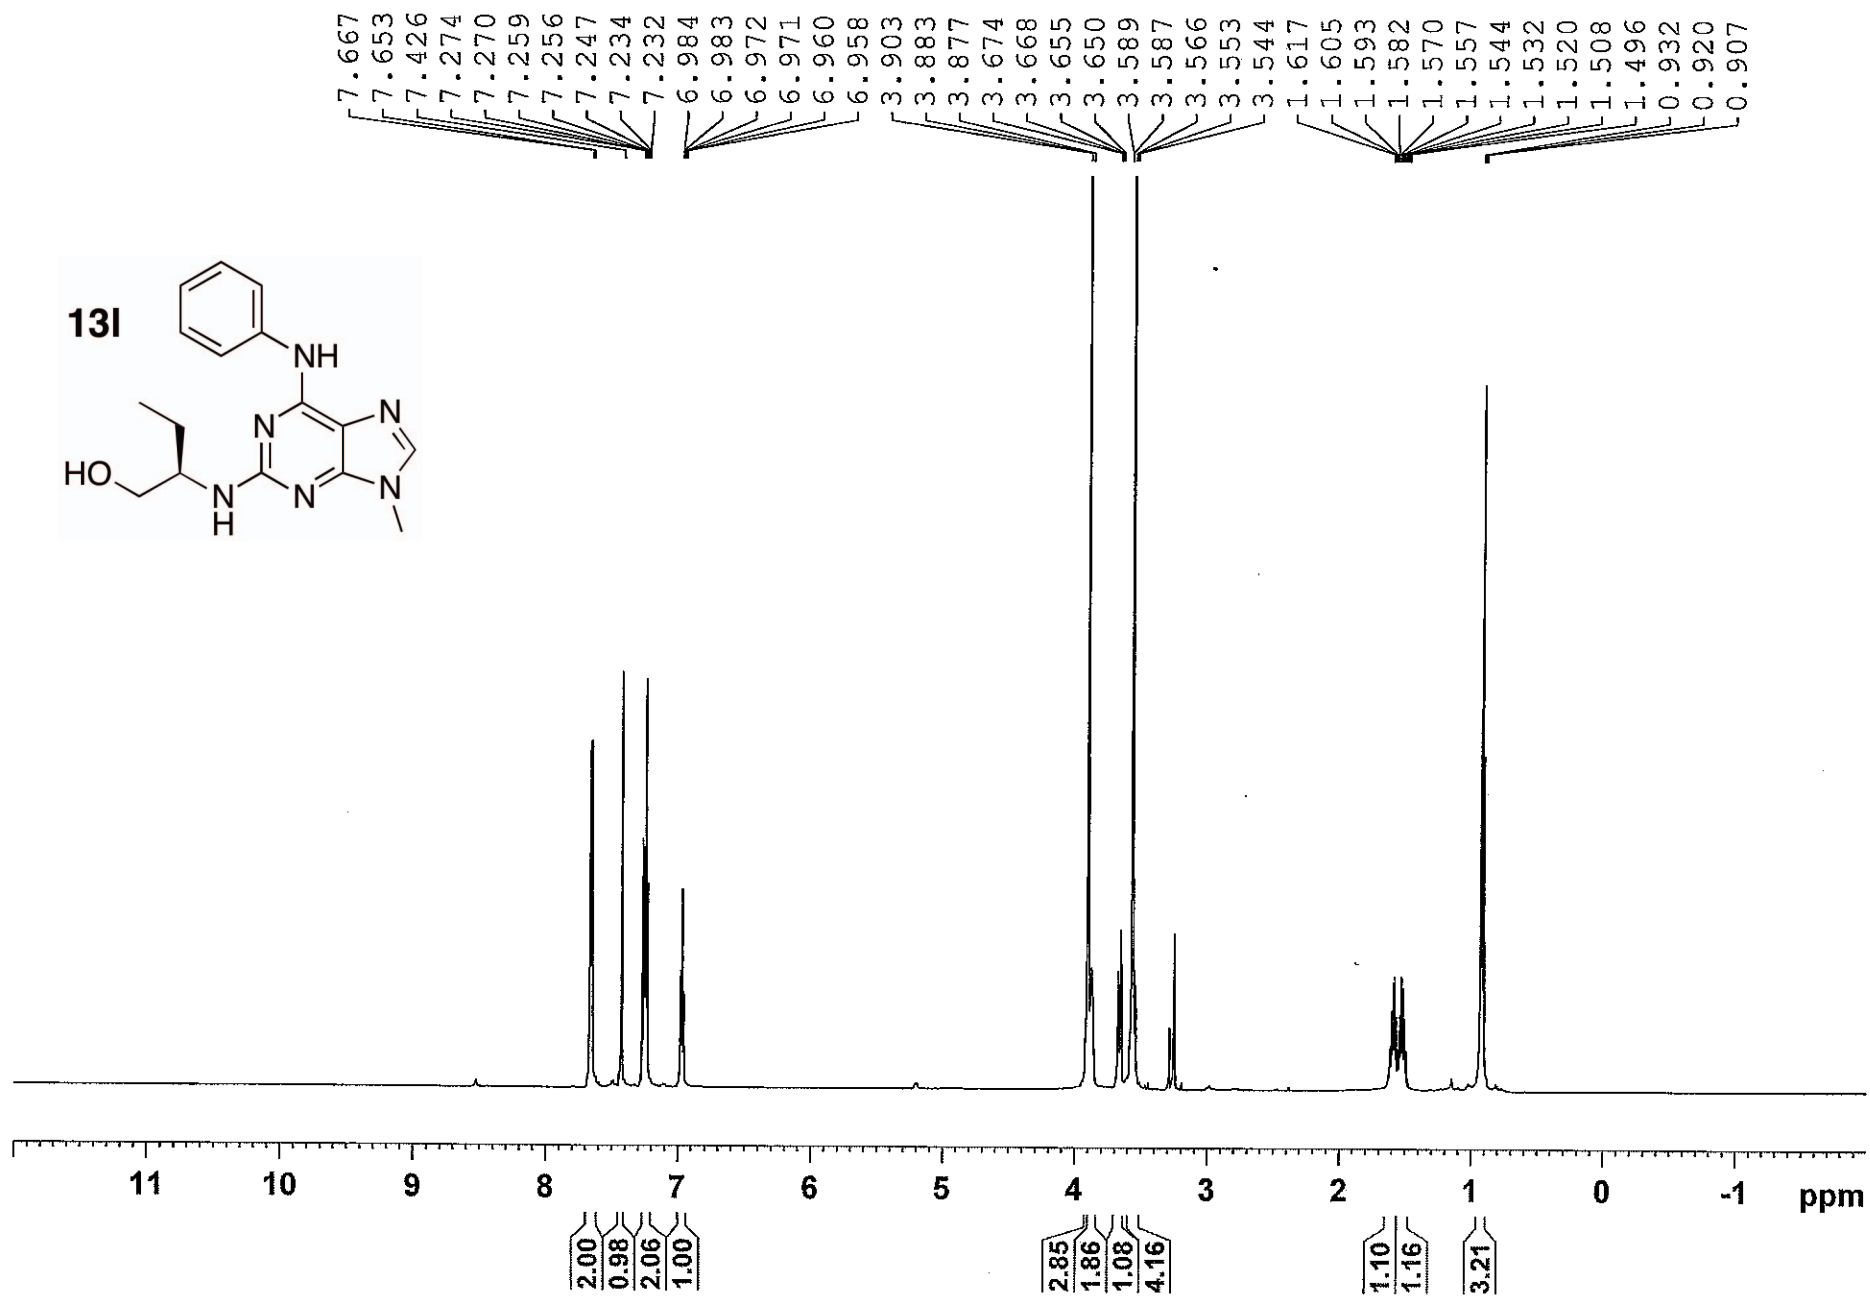

kb-NB-213-27

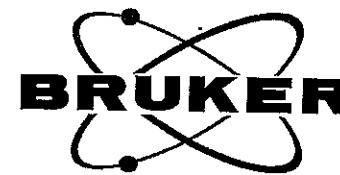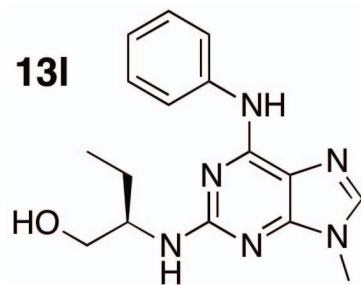

— 159.63  
 — 152.07  
 — 151.09  
 — 138.90  
 — 137.79  
 — 137.77  
 — 128.59  
 — 122.87  
 — 119.89  
 — 113.50

— 65.22  
 — 55.02  
 — 29.13  
 — 24.32  
 — 10.40

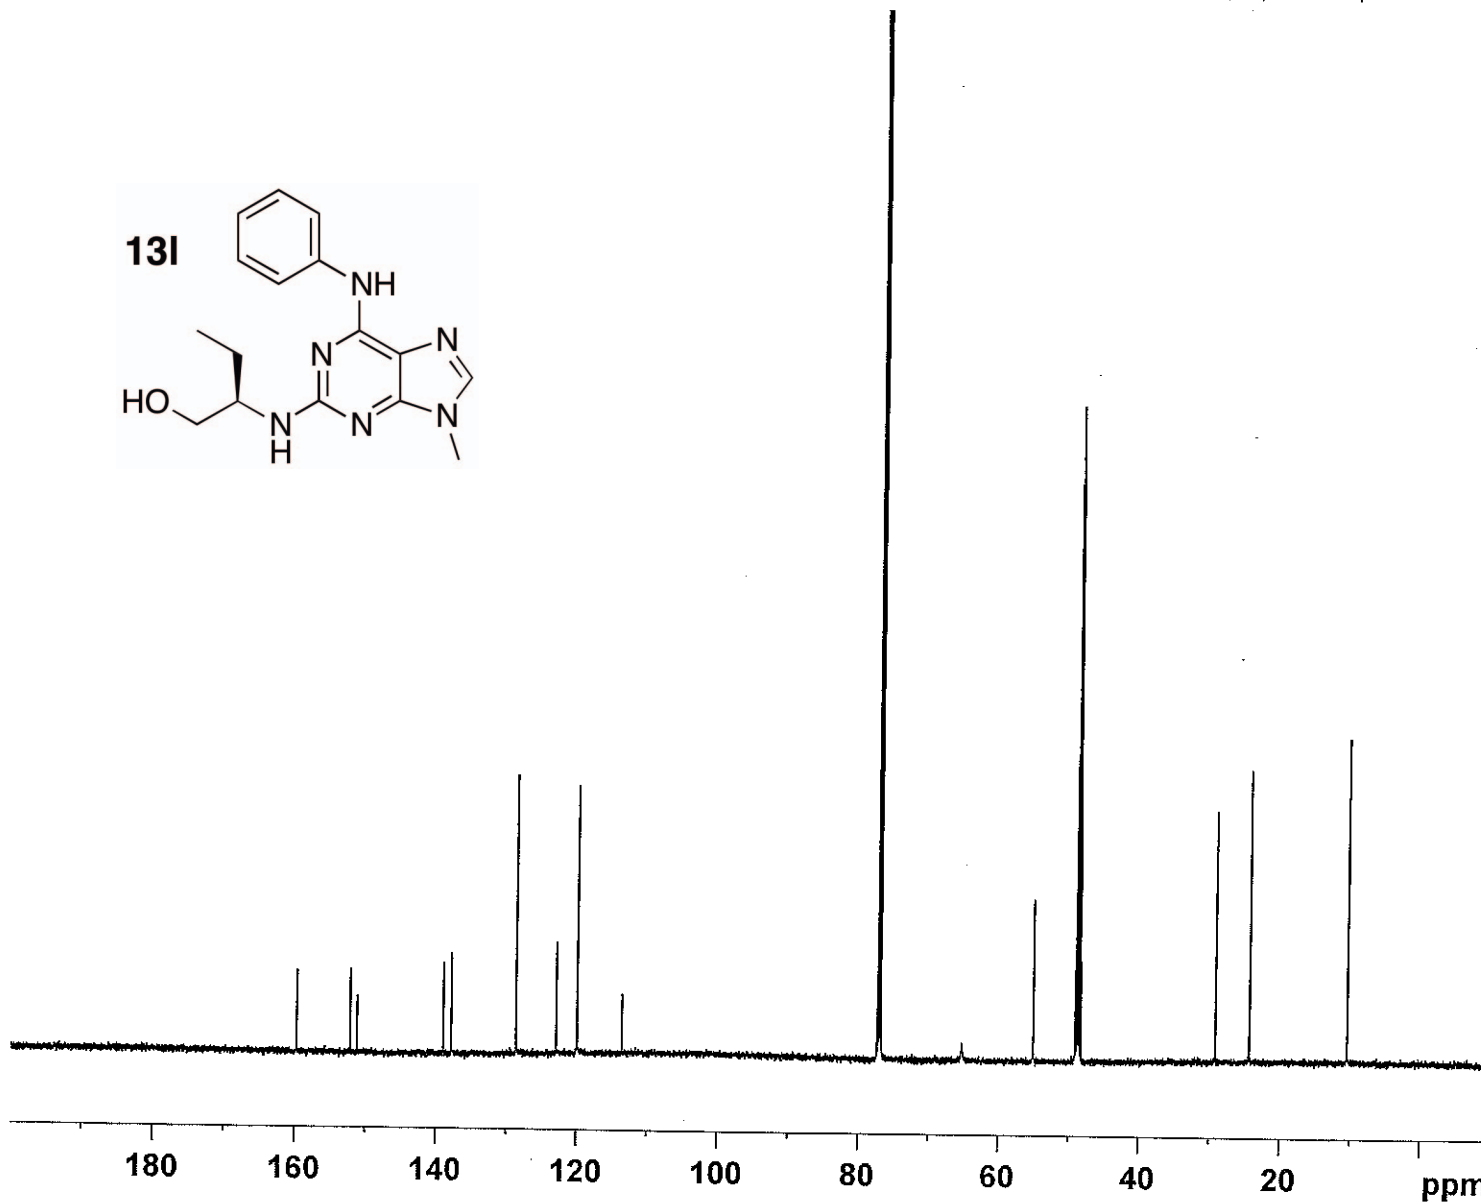

NAME kb-NB-213-27  
 EXPNO 2  
 PROCNO 1  
 Date\_ 20090811  
 Time\_ 10.20  
 INSTRUM spect  
 PROBHD 5 mm CPTCI 1H-  
 PULPROG zgpg30  
 TD 65536  
 SOLVENT CDCl3  
 NS 512  
 DS 4  
 SWH 35971.223 Hz  
 FIDRES 0.548877 Hz  
 AQ 0.9110143 sec  
 RG 18390.4  
 DW 13.900 usec  
 DE 6.50 usec  
 TE 298.0 K  
 D1 2.0000000 sec  
 D11 0.0300000 sec  
 TD0 1

===== CHANNEL f1 =====  
 NUC1 13C  
 P1 12.00 usec  
 PL1 -0.70 dB  
 PL1W 82.63385773 W  
 SFO1 150.9178988 MHz

===== CHANNEL f2 =====  
 CPDPRG2 waltz16  
 NUC2 1H  
 PCPD2 80.00 usec  
 PL2 4.00 dB  
 PL12 24.00 dB  
 PL13 27.00 dB  
 PL2W 7.00000000 W  
 PL12W 0.07000000 W  
 PL13W 0.03508311 W  
 SFO2 600.1324005 MHz  
 SI 32768  
 SF 150.9033311 MHz  
 WDW EM  
 SSB 0  
 LB 1.00 Hz  
 GB 0  
 PC 1.40

kb-NB-213-25

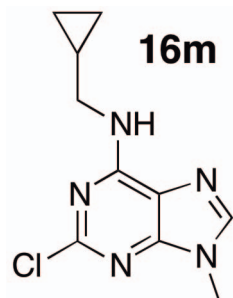

— 7.683

— 7.270

— 6.066

3.783

3.753

3.455

1.107

0.567

0.554

0.546

0.310

0.301

0.293

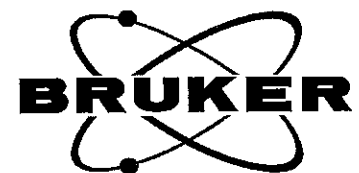

NAME kb-NB-213-25  
EXPNO 1  
PROCNO 1  
Date 20090805  
Time 19.59  
INSTRUM spect  
PROBHD 5 mm CPTCI 1H-  
PULPROG zg30  
TD 65536  
SOLVENT CDCl3  
NS 16  
DS 2  
SWH 12376.237 Hz  
FIDRES 0.188846 Hz  
AQ 2.6477449 sec  
RG 57  
DW 40.400 usec  
DE 6.50 usec  
TE 298.0 K  
DL 1.00000000 sec  
TDO 1

==== CHANNEL f1 =====  
NUC1 1H  
P1 8.00 usec  
PL1 4.00 dB  
PL1W 7.00000000 W  
SFO1 600.1337060 MHz  
SI 32768  
SF 600.1300047 MHz  
WDW EM  
SSB 0  
LB 0.30 Hz  
GB 0  
PC 1.00

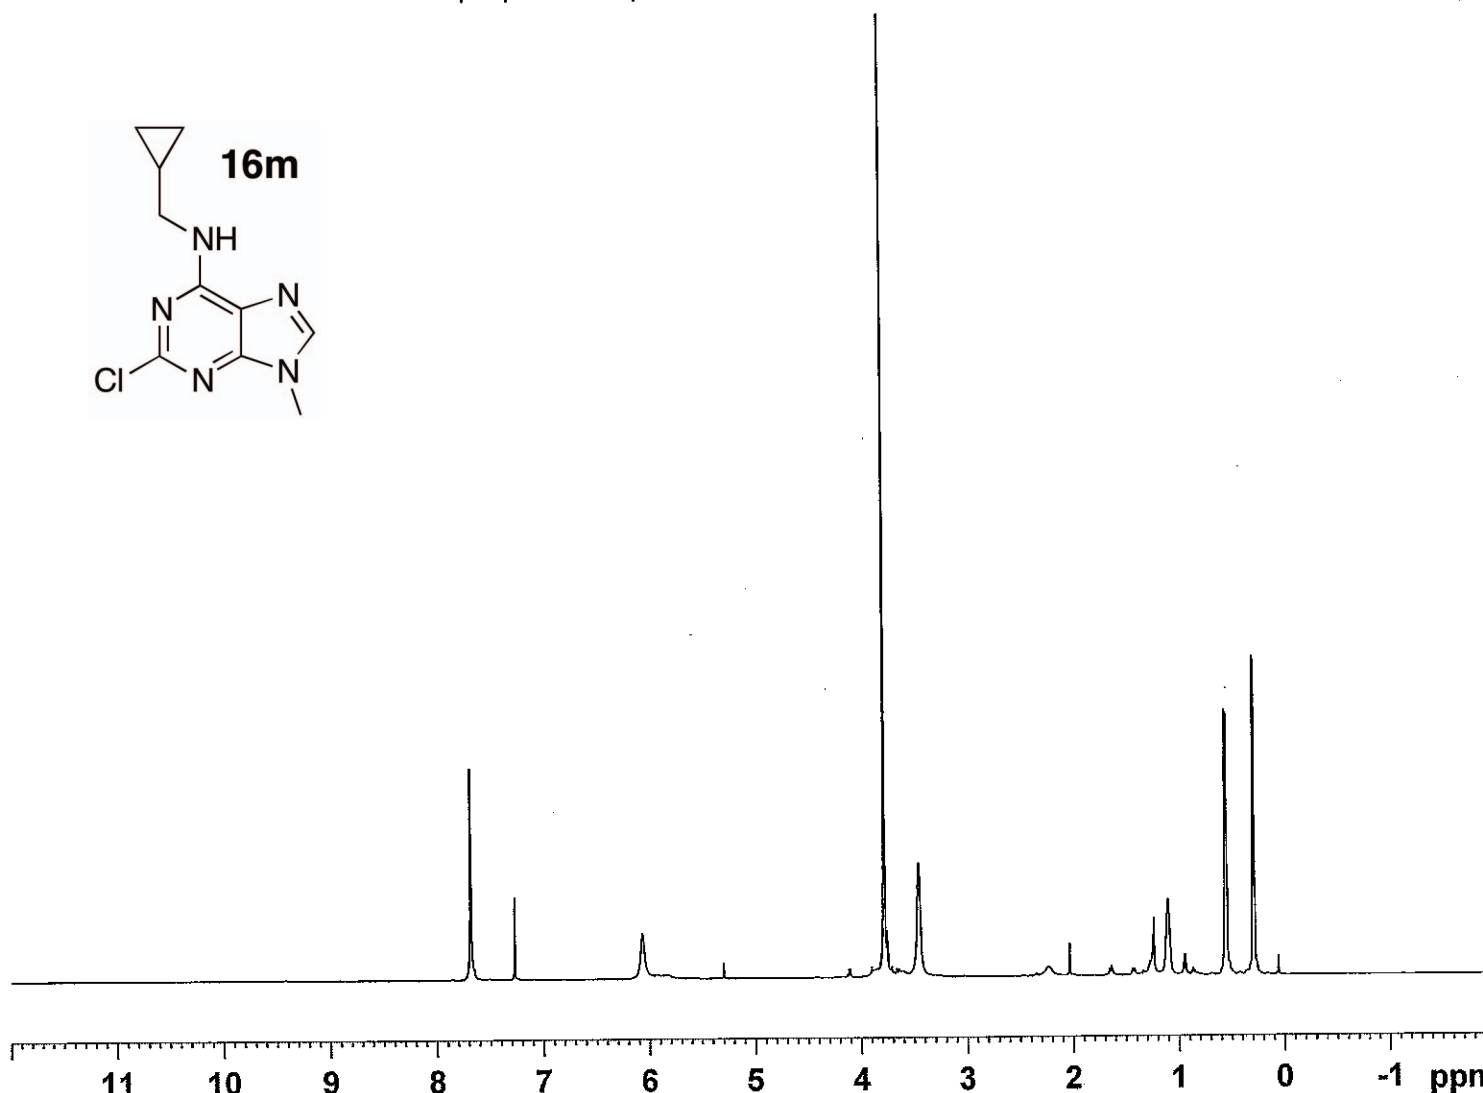

1.00

0.93

3.08

1.57

1.03

1.97

1.99

11 10 9 8 7 6 5 4 3 2 1 0 -1 ppm

kb-NB-213-25

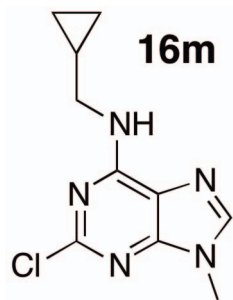

155.09  
154.62  
150.33

140.45  
139.06

118.46

45.81

29.95  
29.64

14.15  
13.73  
10.54

3.51

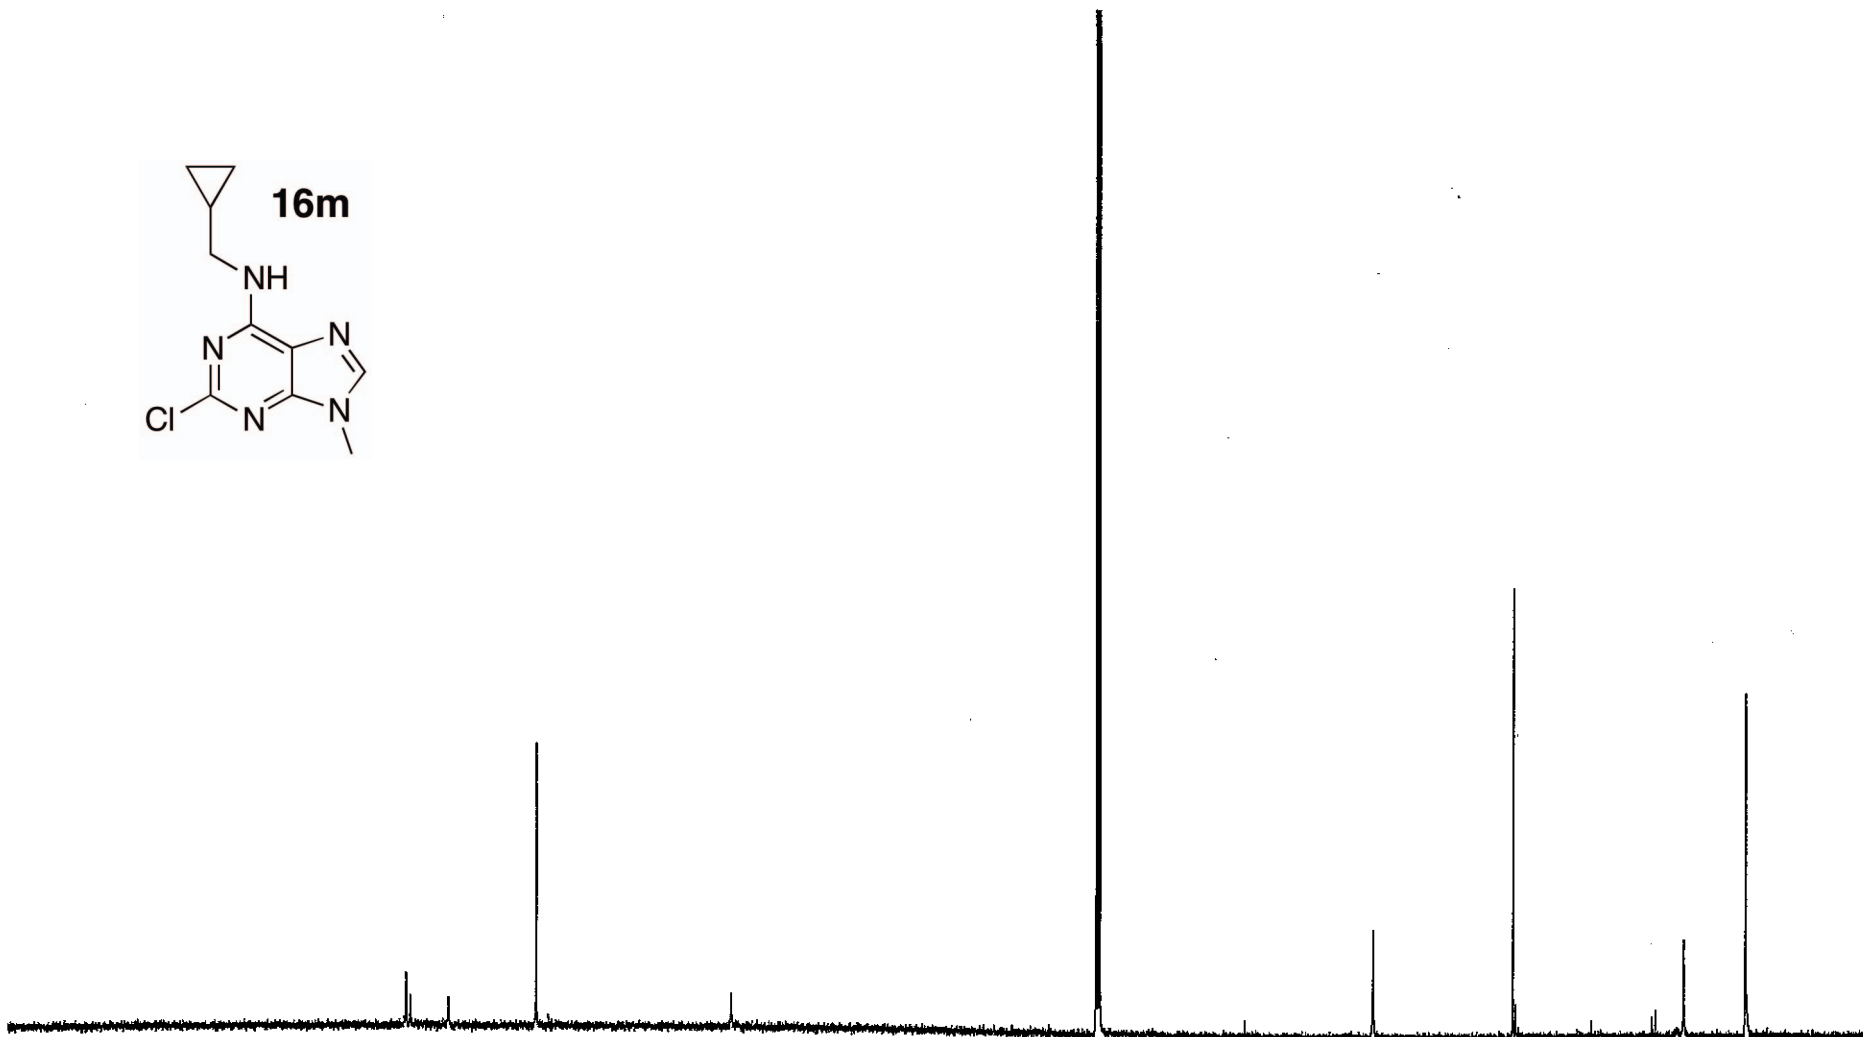

190 180 170 160 150 140 130 120 110 100 90 80 70 60 50 40 30 20 10 ppm

kb-NB-213-28

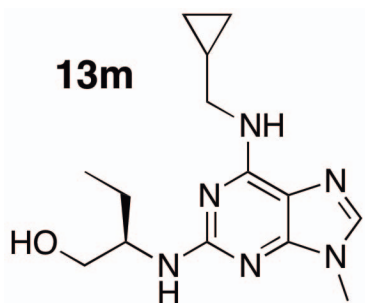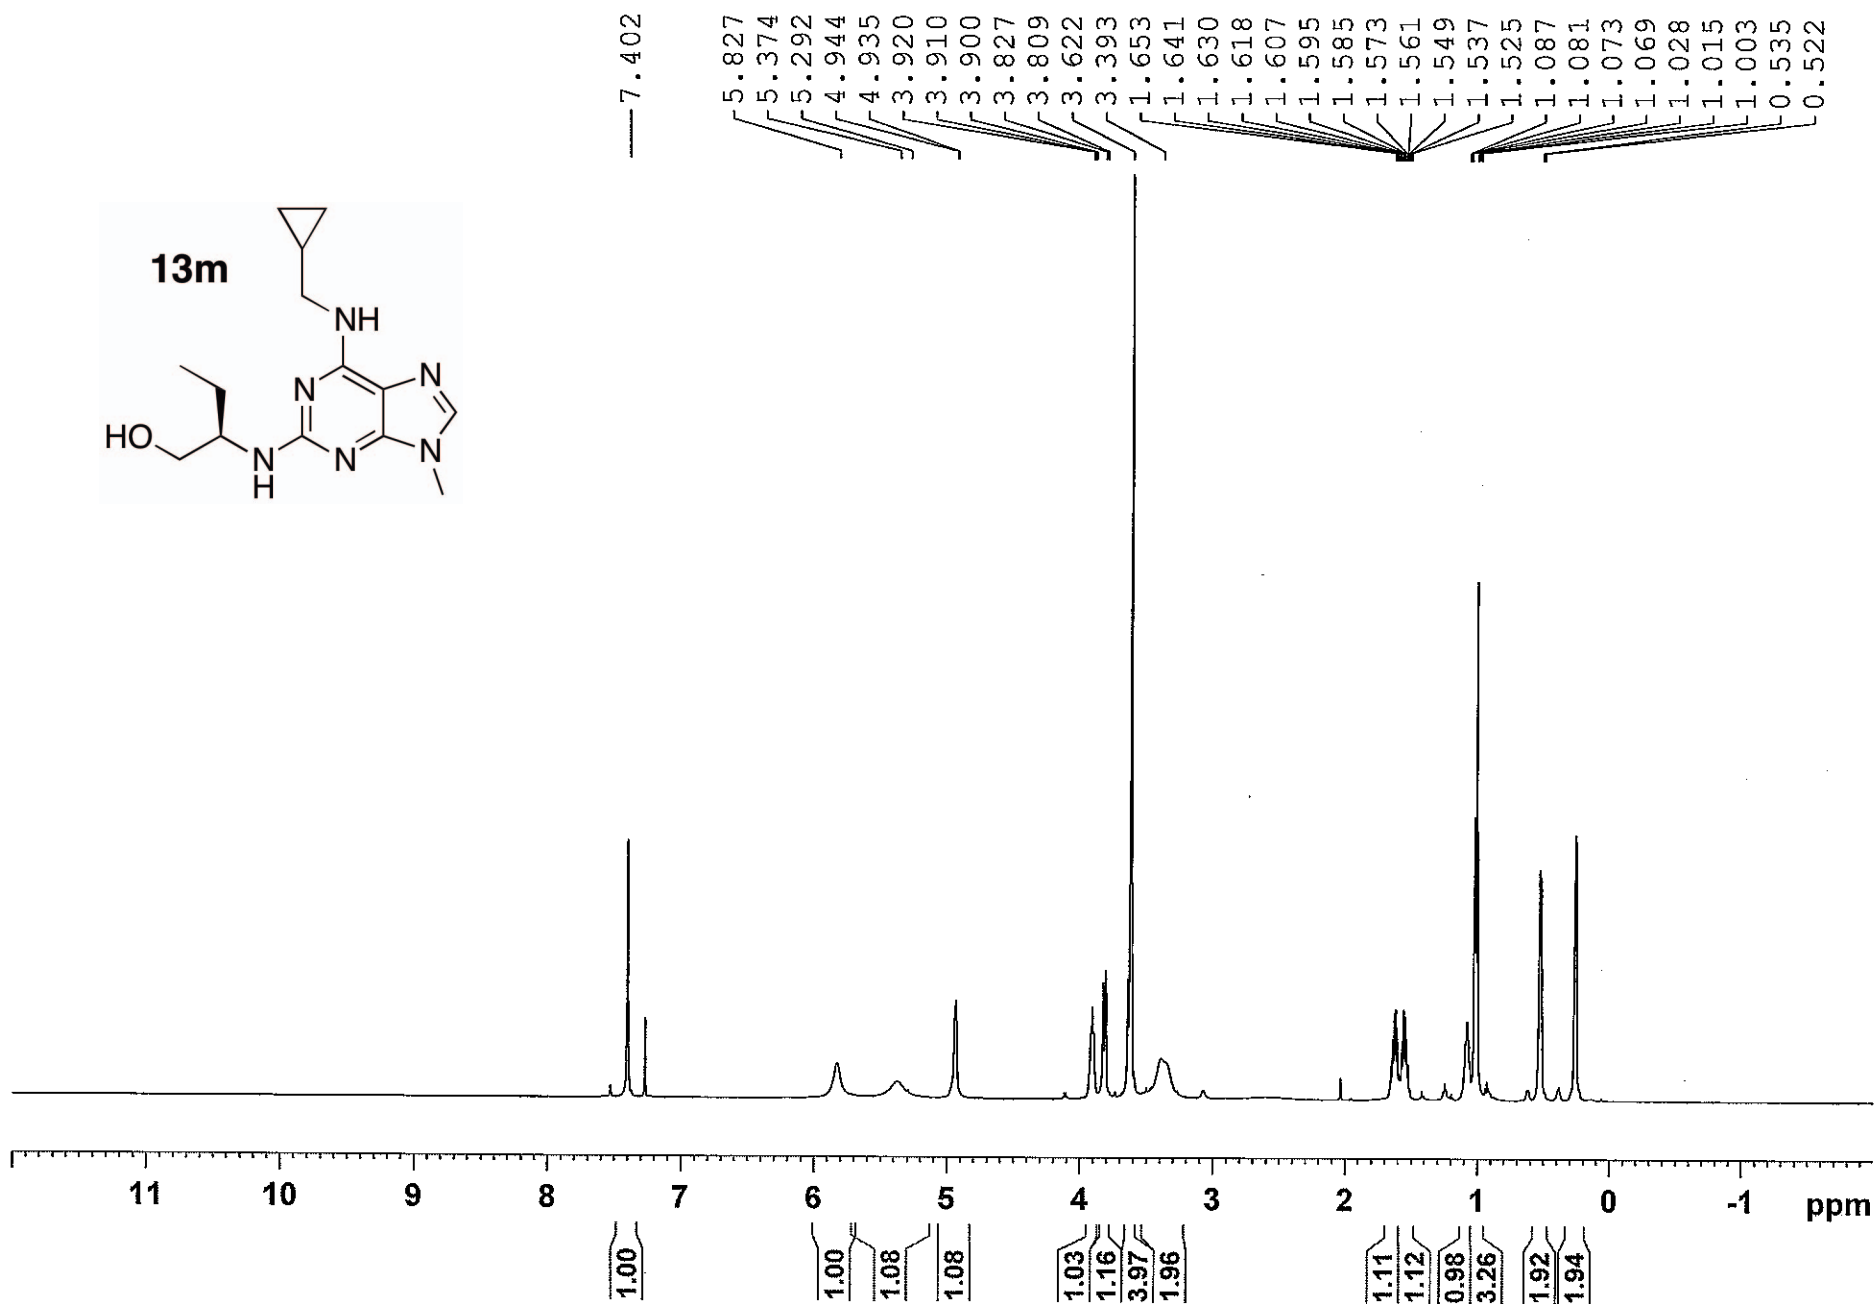

kb-NB-213-28

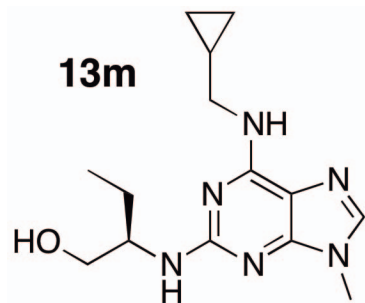

160.25  
159.81  
155.20  
154.77  
150.79

137.33

113.97

68.08

56.10

45.41

29.28

24.97

24.90

10.86

10.80

10.73

3.42

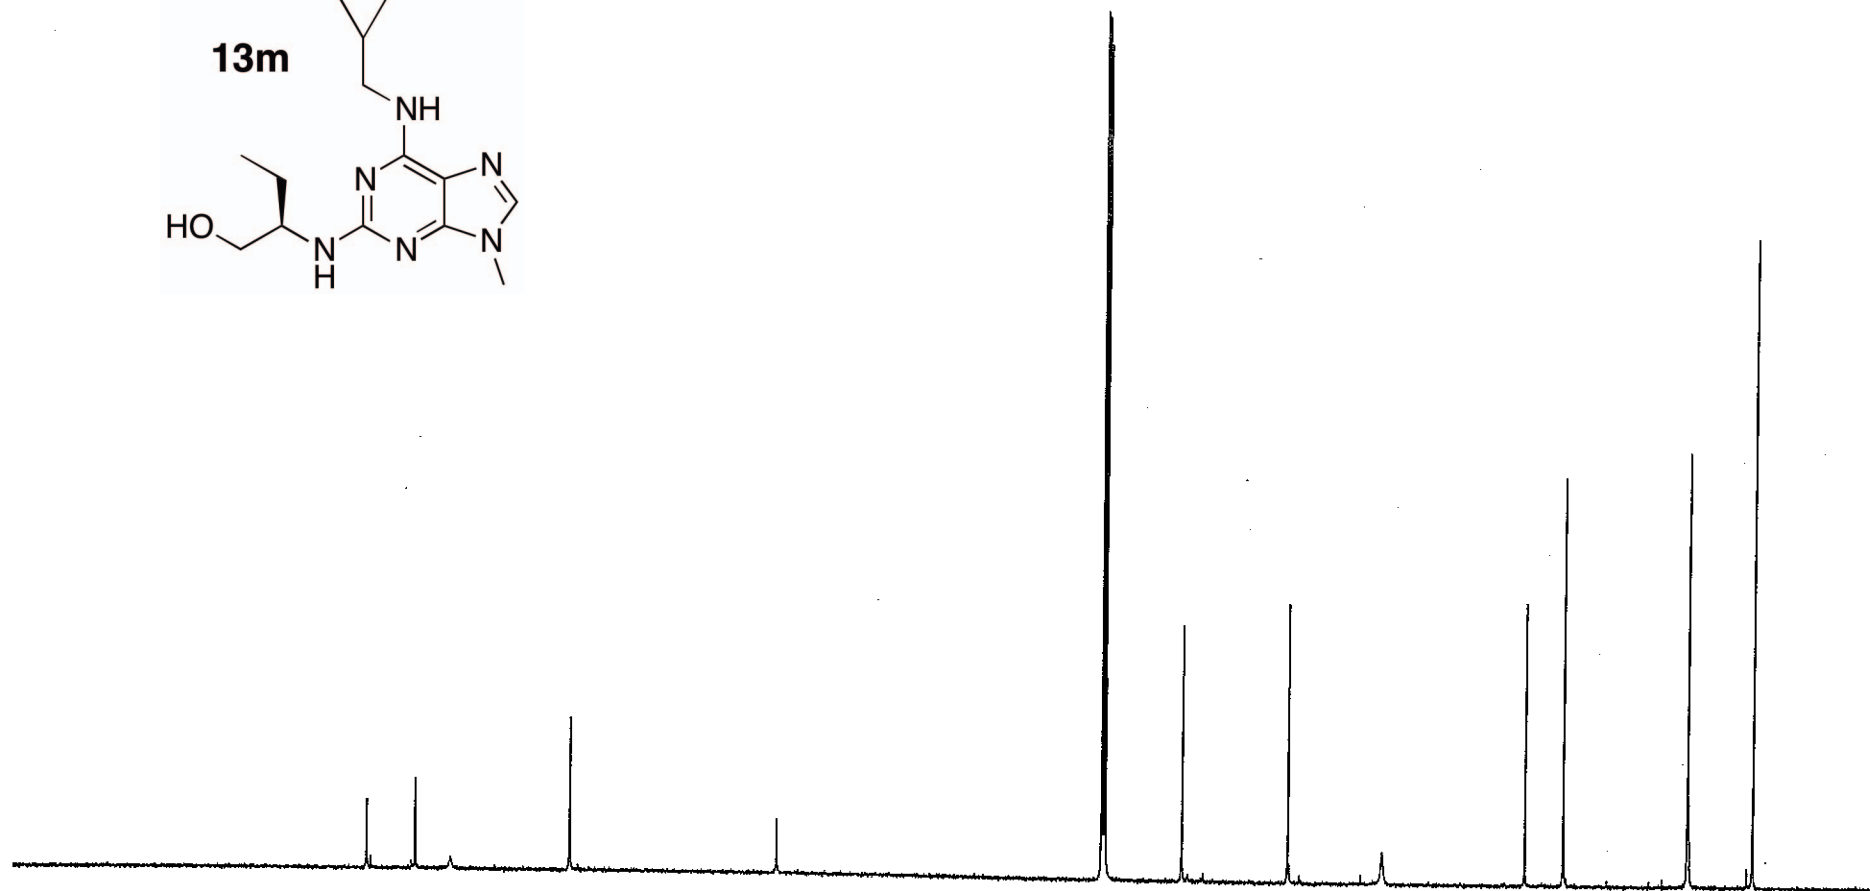

190 180 170 160 150 140 130 120 110 100 90 80 70 60 50 40 30 20 10 ppm



kb-NB-213-29

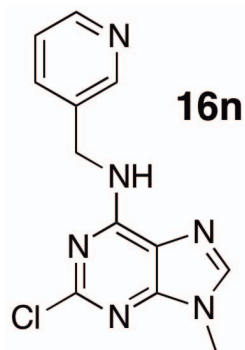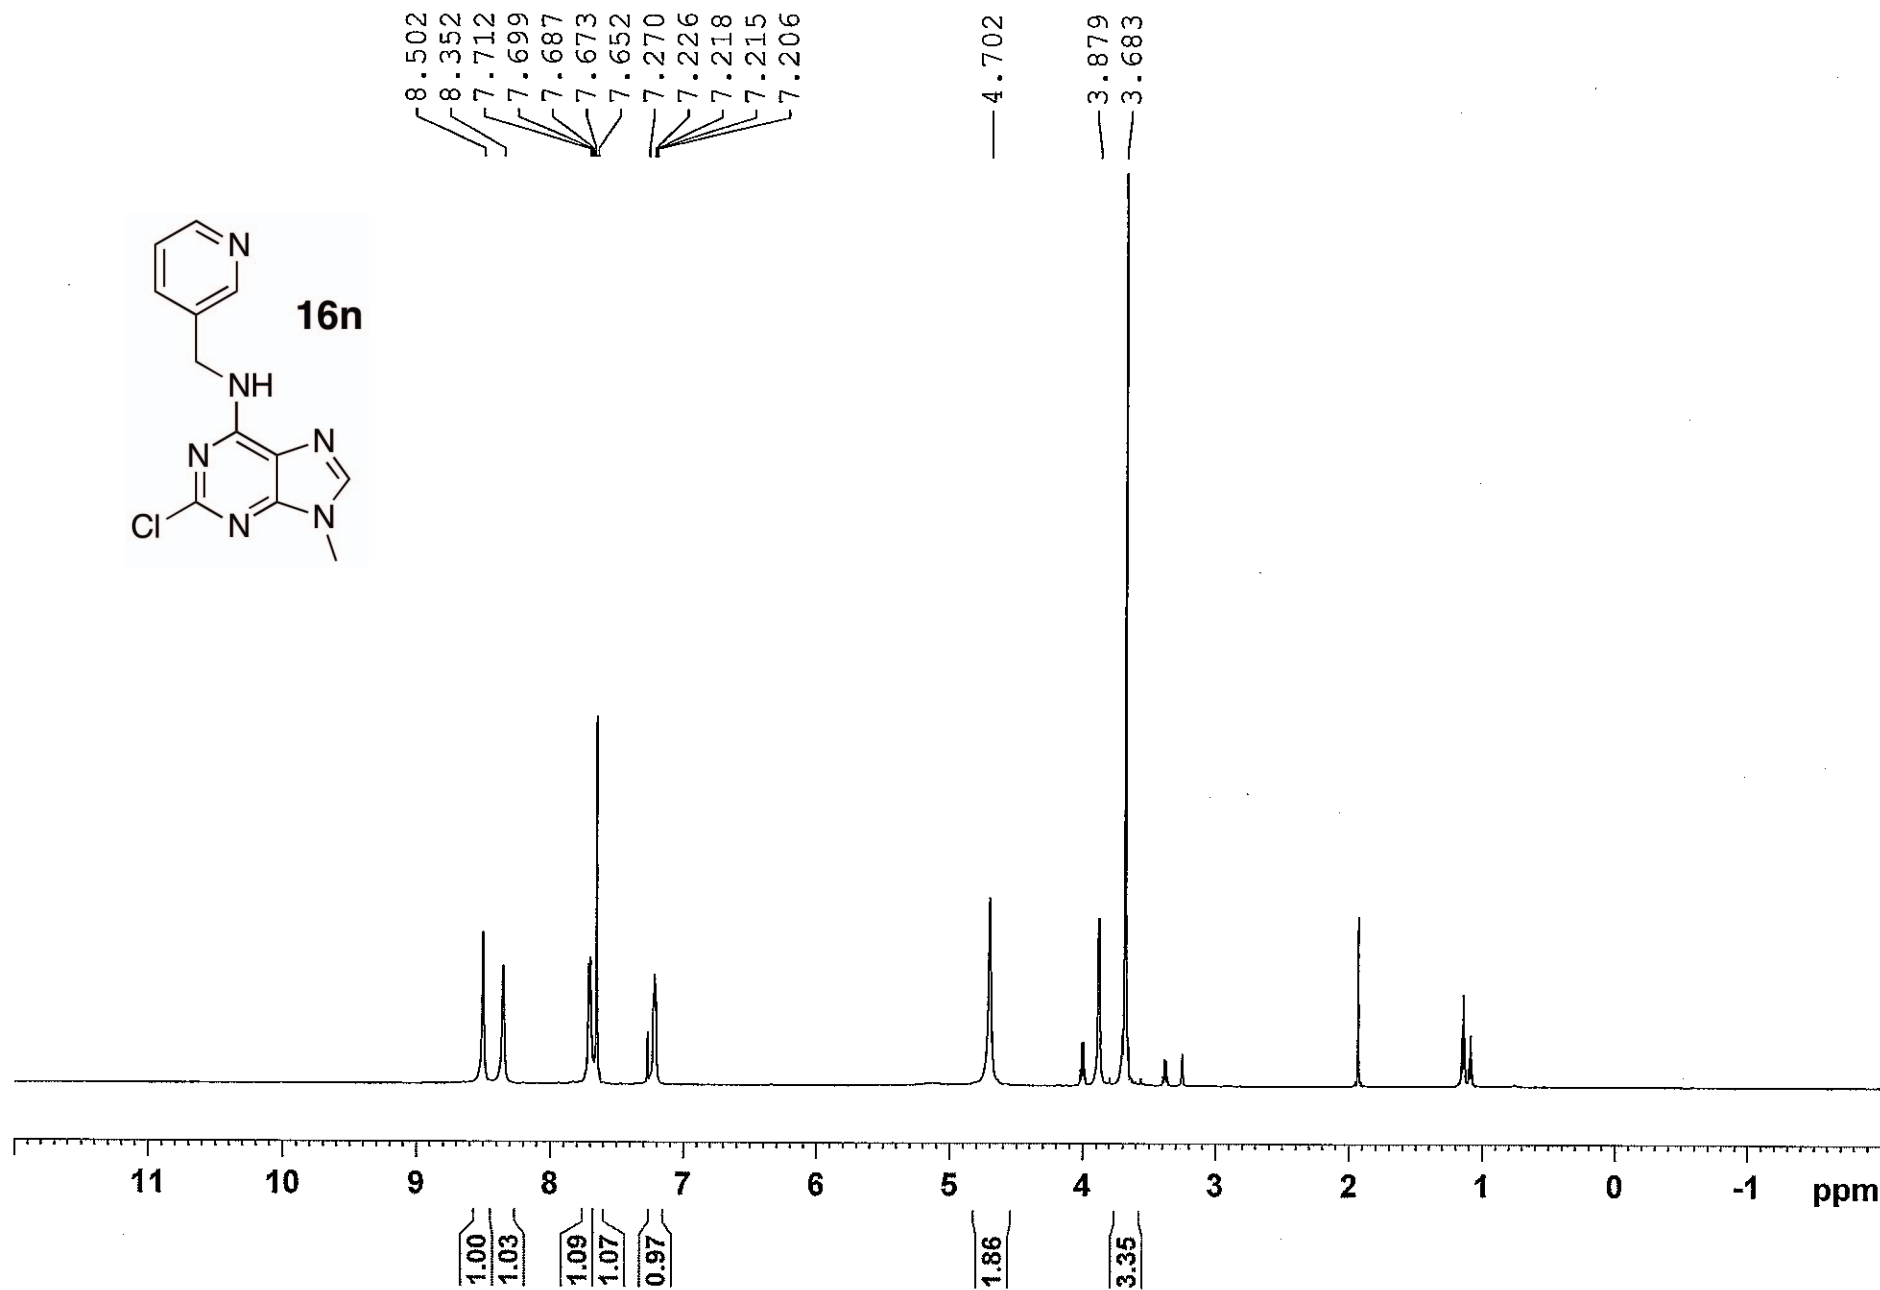

kb-NB-213-29

154.59  
154.29  
150.25  
148.57  
147.91  
141.12  
140.70  
136.20  
134.12  
123.63  
117.79

65.64  
60.34  
41.61  
29.76

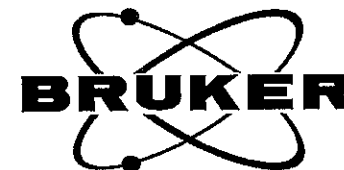

NAME kb-NB-213-29  
EXPNO 2  
PROCNO 1  
Date\_ 20090807  
Time\_ 15.11  
INSTRUM spect  
PROBHD 5 mm CPTCI 1H-  
PULPROG zgpg30  
TD 65536  
SOLVENT CDCl3  
NS 256  
DS 4  
SWH 35971.223 Hz  
FIDRES 0.548877 Hz  
AQ 0.9110143 sec  
RG 13004  
DW 13.900 usec  
DE 6.50 usec  
TE 298.0 K  
D1 2.0000000 sec  
D11 0.0300000 sec  
TDO 1

===== CHANNEL f1 =====  
NUC1 13C  
P1 12.00 usec  
PL1 -0.70 dB  
PL1W 82.63385773 W  
SFO1 150.9178988 MHz

===== CHANNEL f2 =====  
CPDPRG2 waltz16  
NUC2 1H  
PCPD2 80.00 usec  
PL2 4.00 dB  
PL12 24.00 dB  
PL13 27.00 dB  
PL2W 7.00000000 W  
PL12W 0.07000000 W  
PL13W 0.03508311 W  
SFO2 600.1324005 MHz  
SI 32768  
SF 150.9028324 MHz  
WDW EM  
SSB 0  
LB 1.00 Hz  
GB 0  
PC 1.40

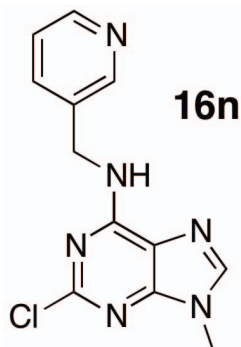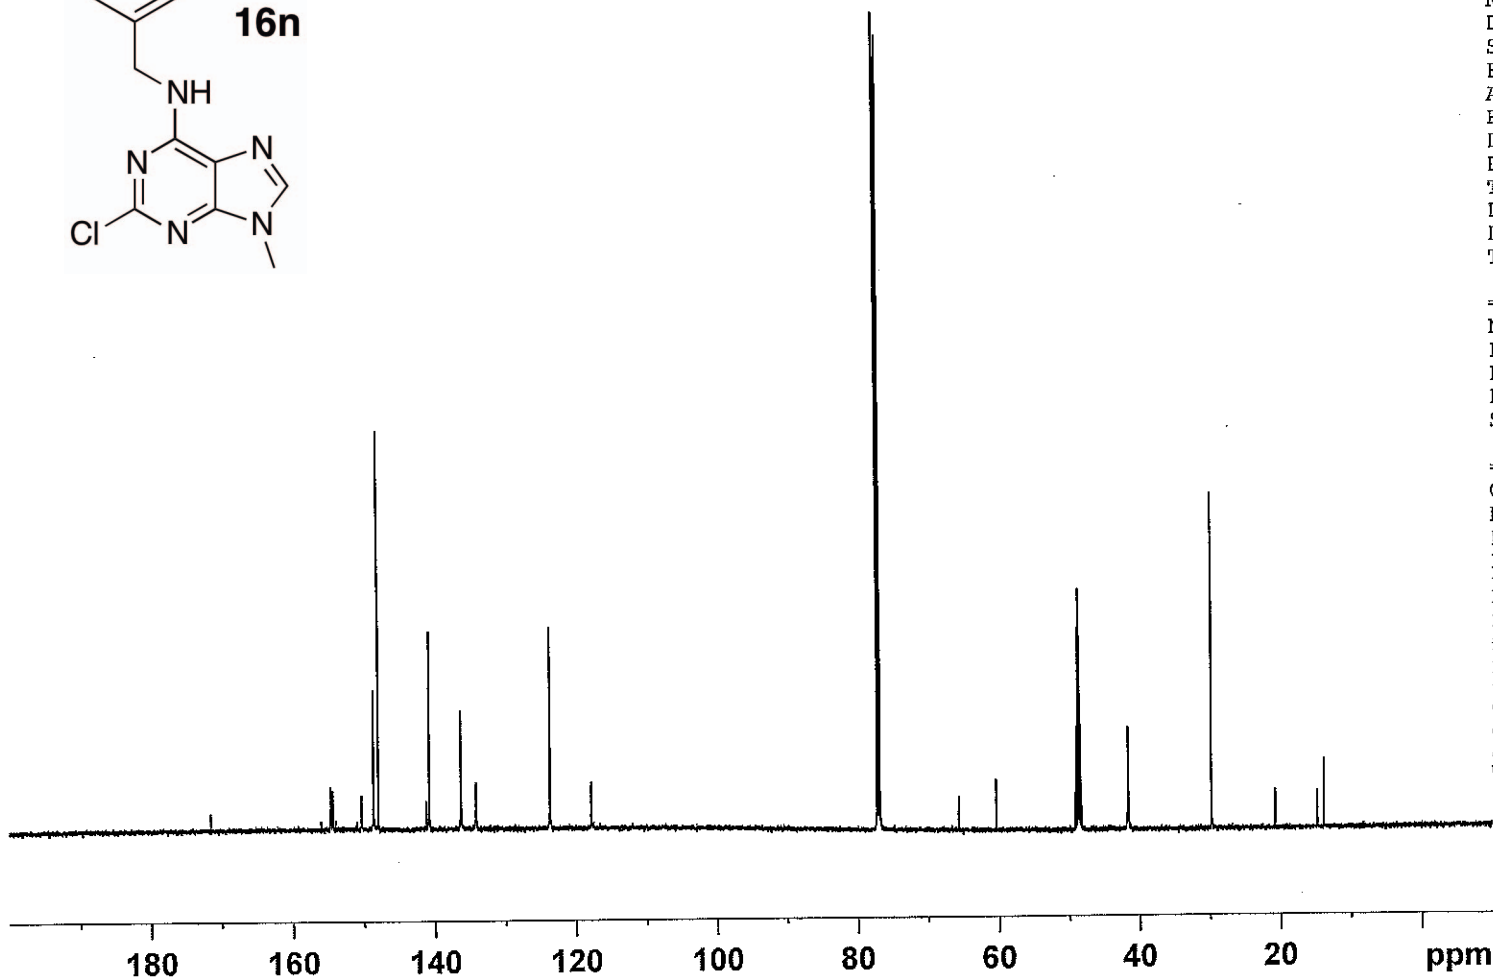

Kb-NB-213-32

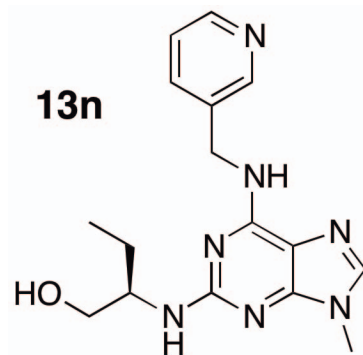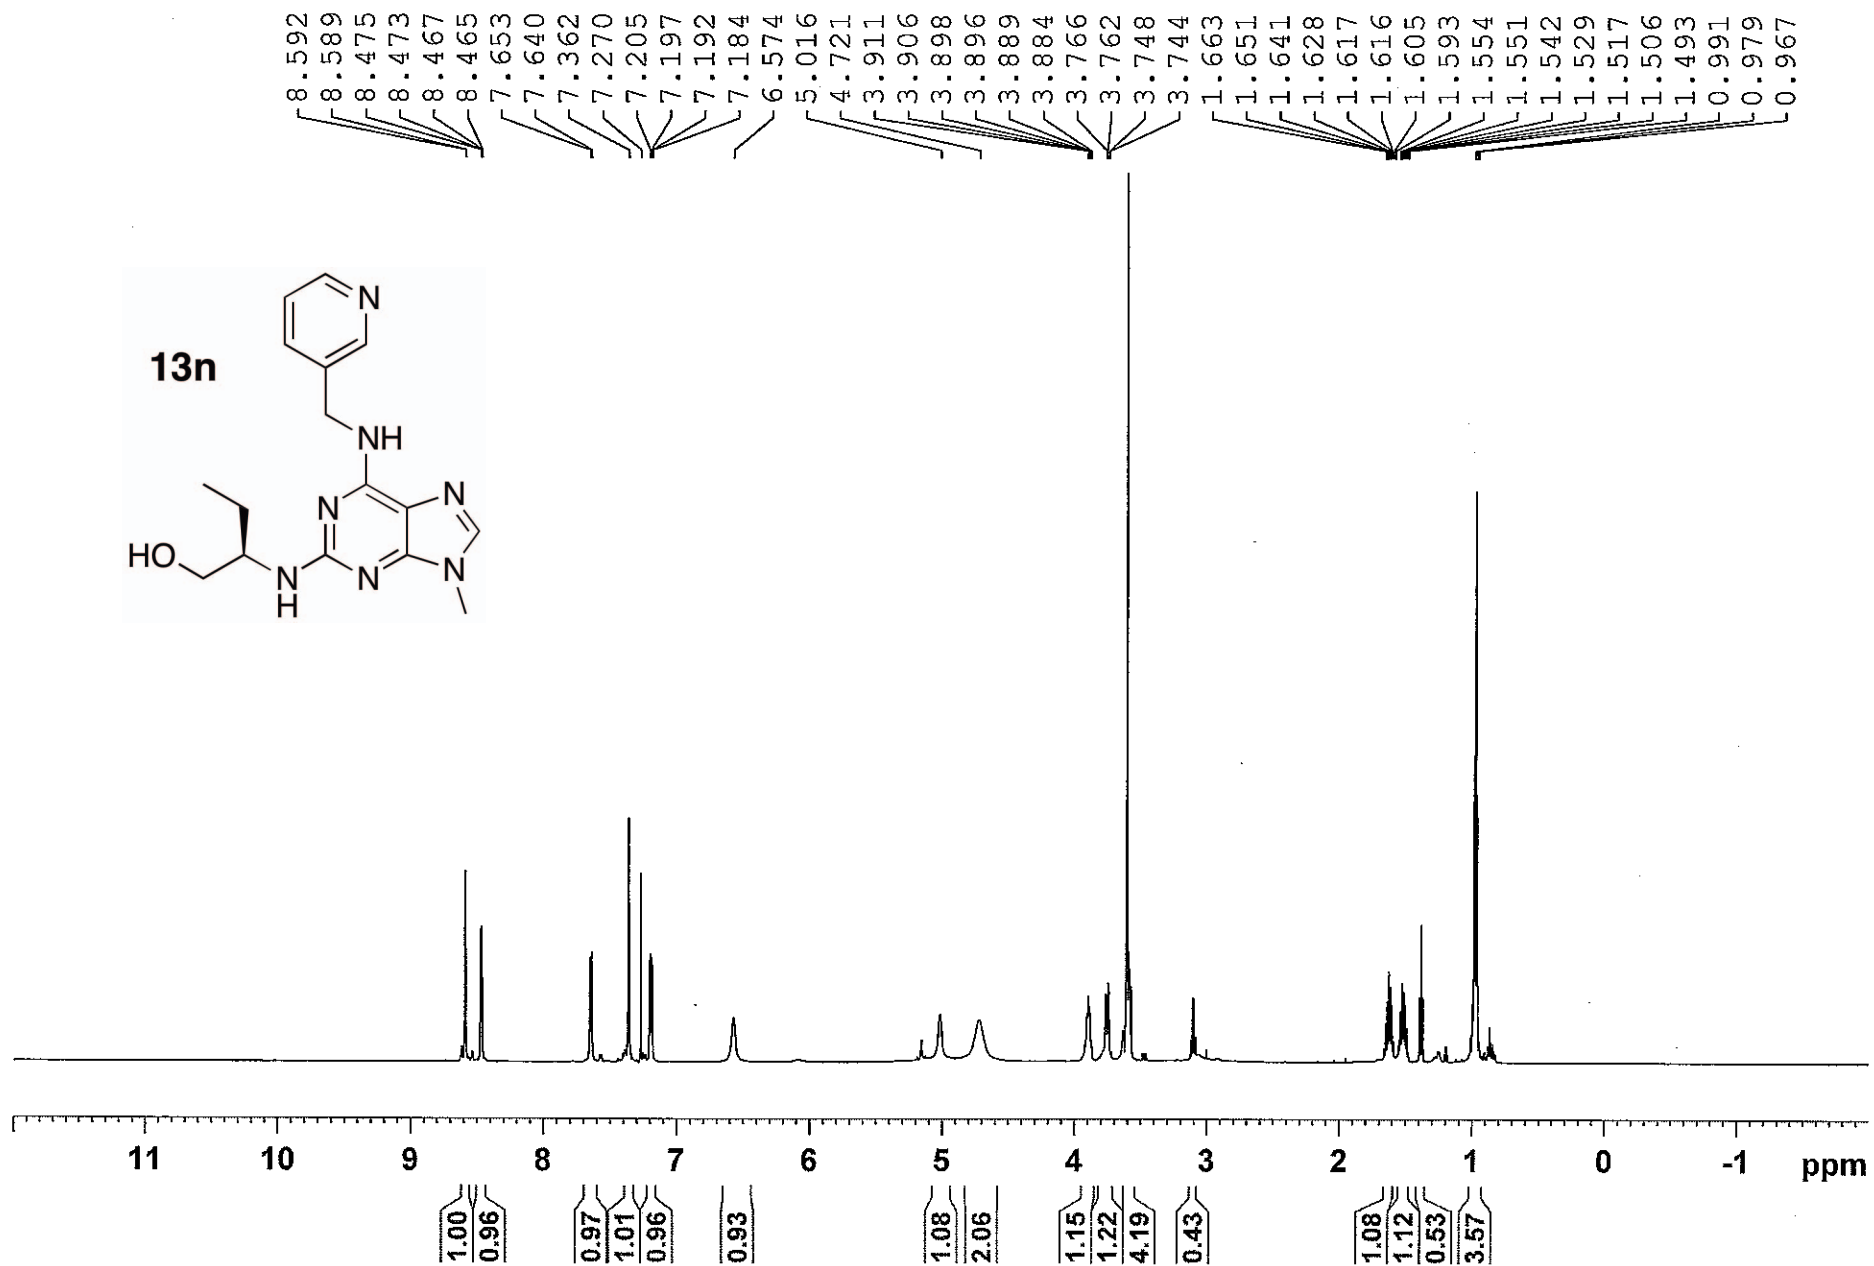

kb-NB-213-32

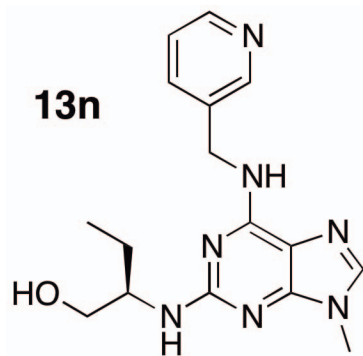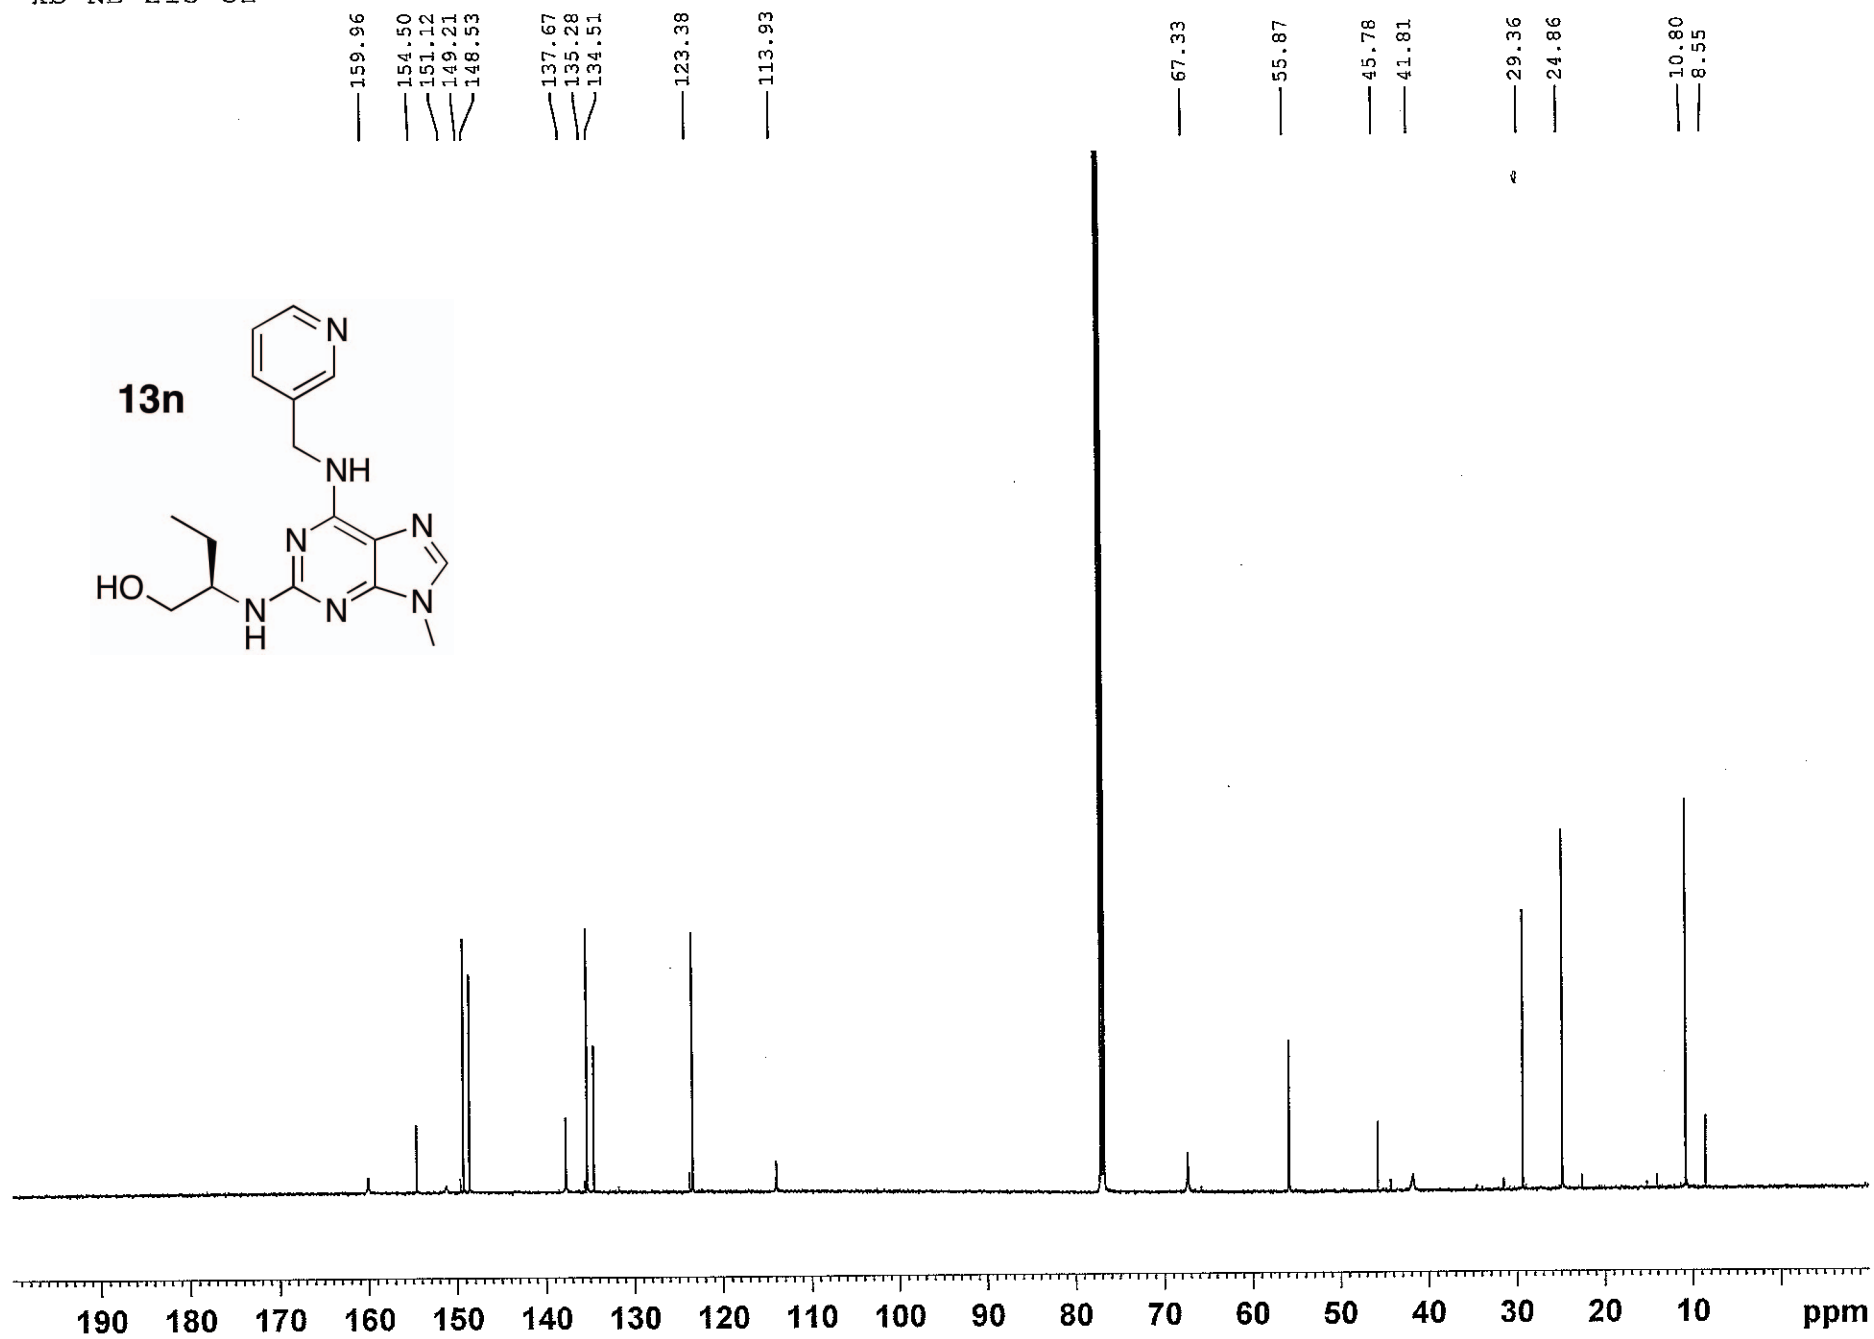

kb-NB-213-33

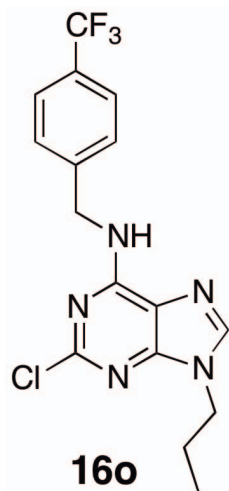

7.582  
7.569  
7.485  
7.472  
6.961

4.898  
4.097  
4.085  
4.073

2.374  
1.887  
1.875  
1.863  
1.851  
0.947  
0.935  
0.922

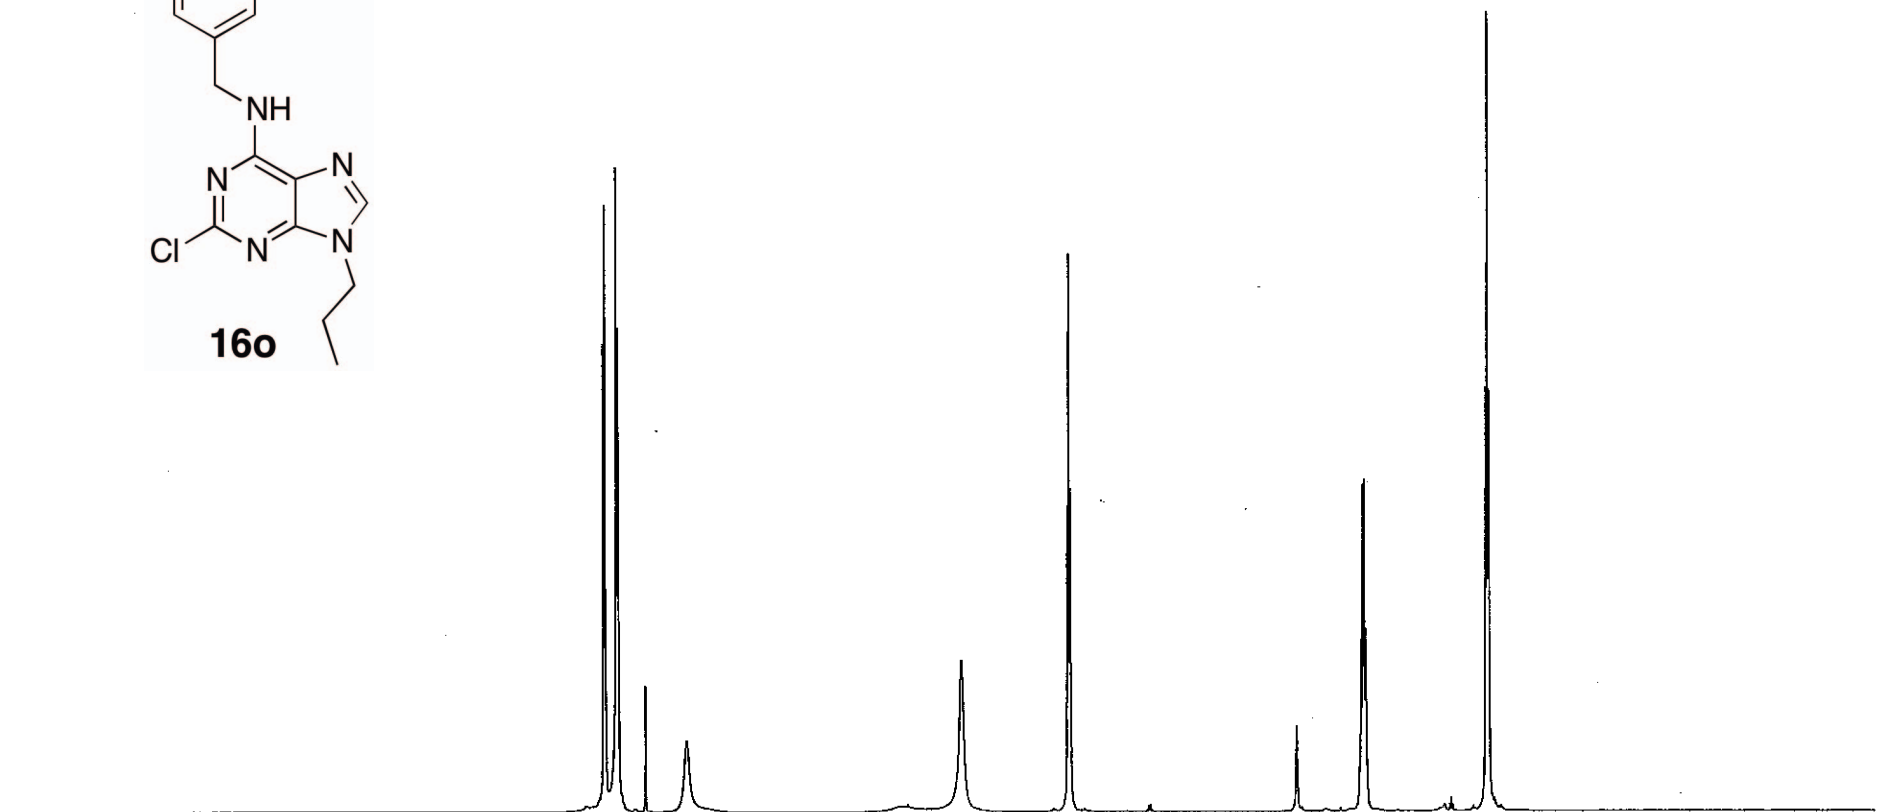

11 10 9 8 7 6 5 4 3 2 1 0 -1 ppm

2.11  
2.56  
0.93

1.72  
1.99

1.99  
3.03

kb-NB-213-33

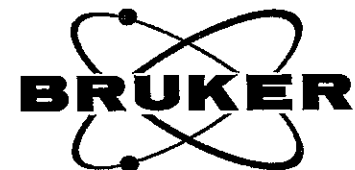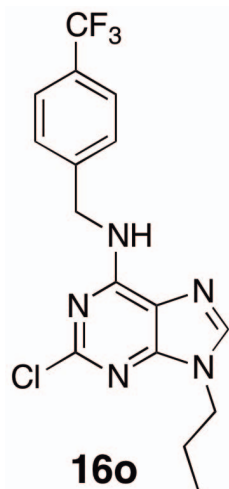

155.03  
 154.44  
 150.42  
 142.27  
 140.30  
 130.08  
 129.86  
 129.65  
 129.43  
 127.96  
 126.70  
 125.55  
 125.53  
 125.51  
 124.90  
 123.10  
 121.30  
 118.60

45.51  
43.92

23.27

11.03

NAME kb-NB-213-33  
 EXPNO 2  
 PROCNO 1  
 Date\_ 20090812  
 Time 23.14  
 INSTRUM spect  
 PROBHD 5 mm CPTCI 1H-  
 PULPROG zgpg30  
 TD 65536  
 SOLVENT CDCl3  
 NS 1024  
 DS 4  
 SWH 35971.223 Hz  
 FIDRES 0.548877 Hz  
 AQ 0.9110143 sec  
 RG 13004  
 DW 13.900 usec  
 DE 6.50 usec  
 TE 298.0 K  
 D1 2.00000000 sec  
 D11 0.03000000 sec  
 TD0 1

===== CHANNEL f1 =====  
 NUC1 13C  
 P1 12.00 usec  
 PL1 -0.70 dB  
 PL1W 82.63385773 W  
 SFO1 150.9178988 MHz

===== CHANNEL f2 =====  
 CPDPRG2 waltz16  
 NUC2 1H  
 PCPD2 80.00 usec  
 PL2 4.00 dB  
 PL12 24.00 dB  
 PL13 27.00 dB  
 PL2W 7.00000000 W  
 PL12W 0.07000000 W  
 PL13W 0.03508311 W  
 SFO2 600.1324005 MHz  
 SI 32768  
 SF 150.9028160 MHz  
 WDW EM  
 SSB 0  
 LB 1.00 Hz  
 GB 0  
 PC 1.40

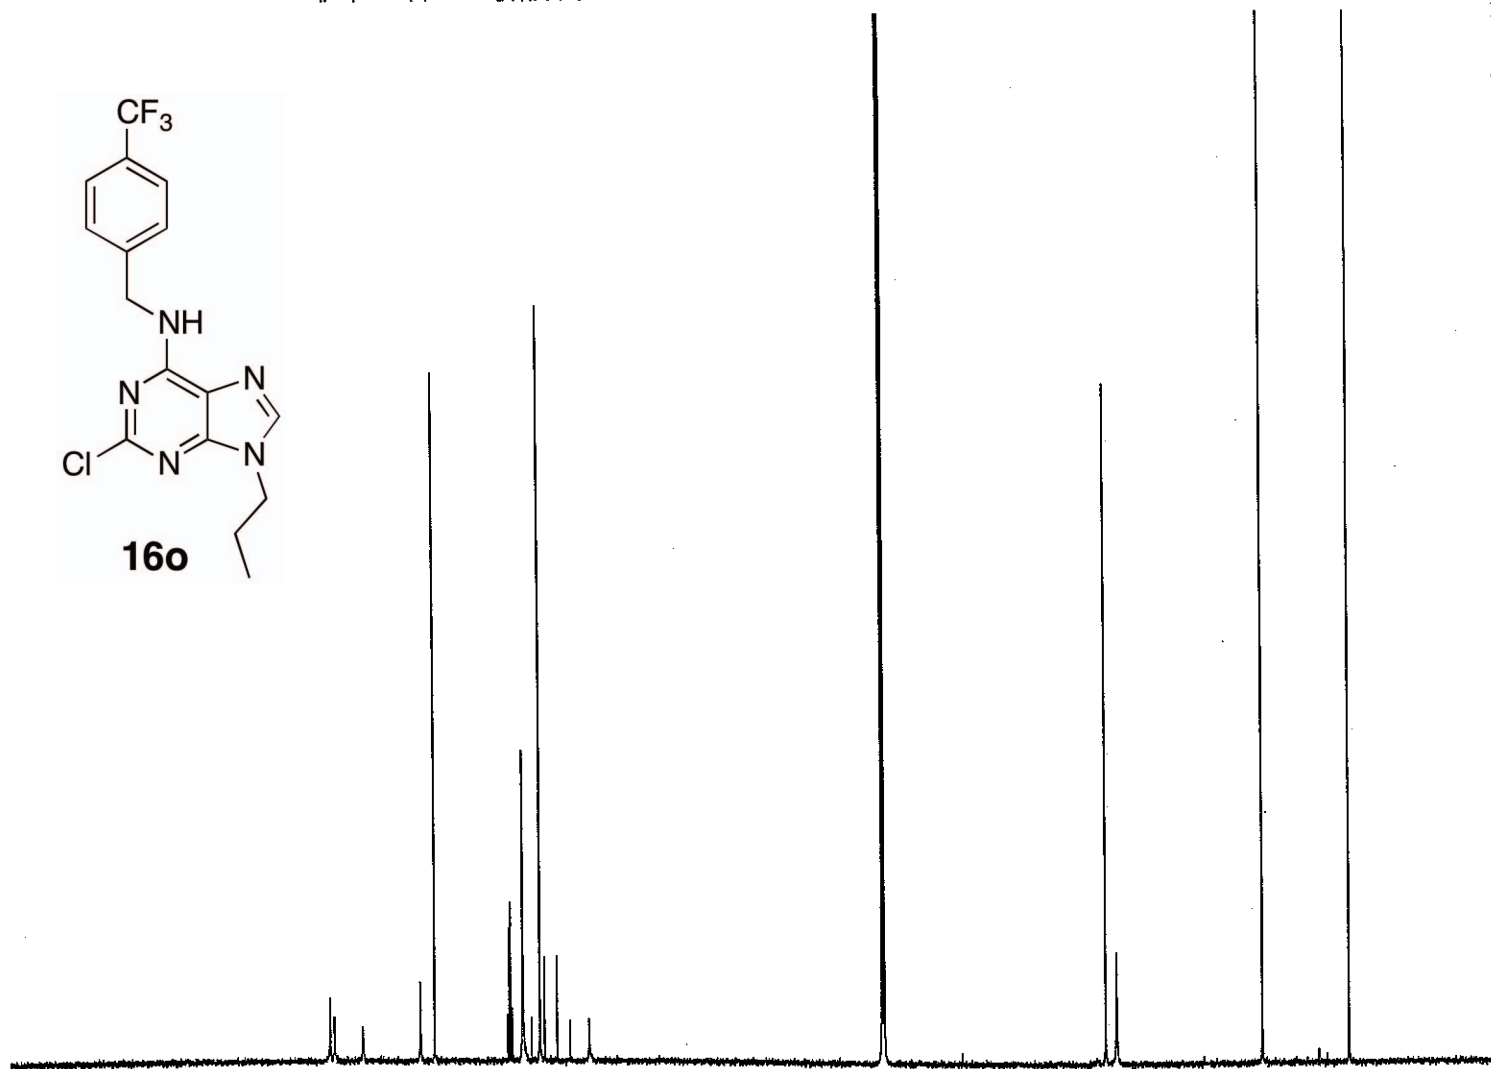

180 160 140 120 100 80 60 40 20 ppm

kb-NB-213-35

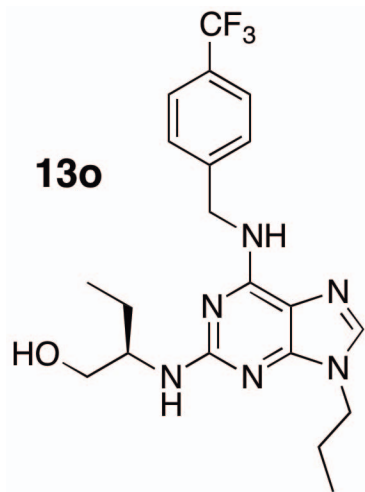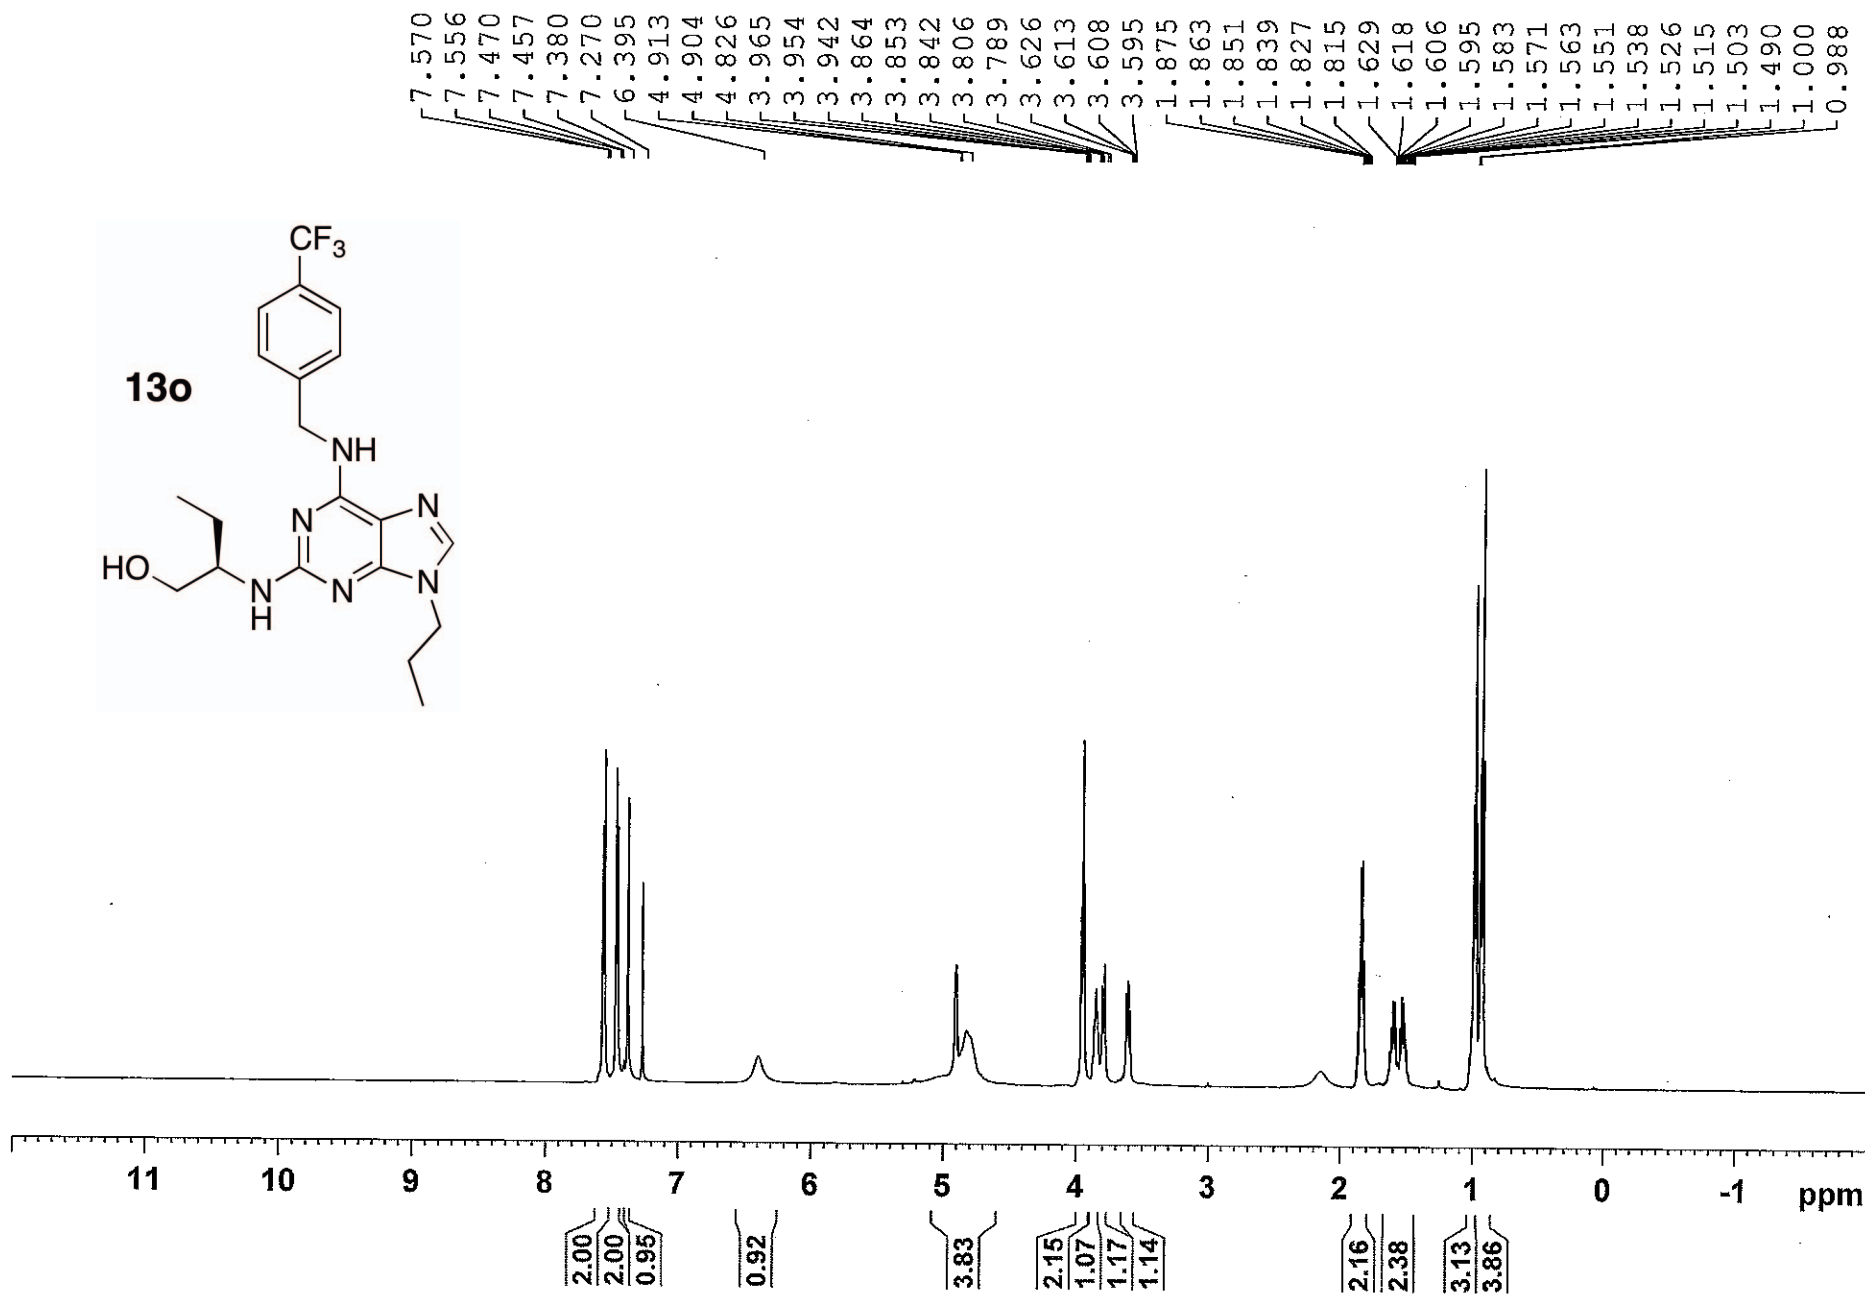

kb-NB-213-35

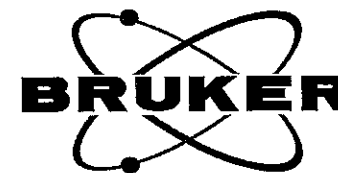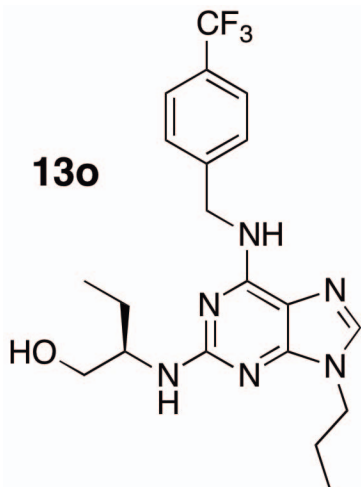

160.12  
154.73  
150.83  
143.15  
137.29  
129.75  
129.53  
129.32  
129.11  
127.66  
126.82  
125.45  
125.43  
125.40  
125.38  
125.02  
123.21  
121.41  
114.29

68.15  
56.20  
45.08  
43.75  
24.94  
23.15  
11.17  
10.86

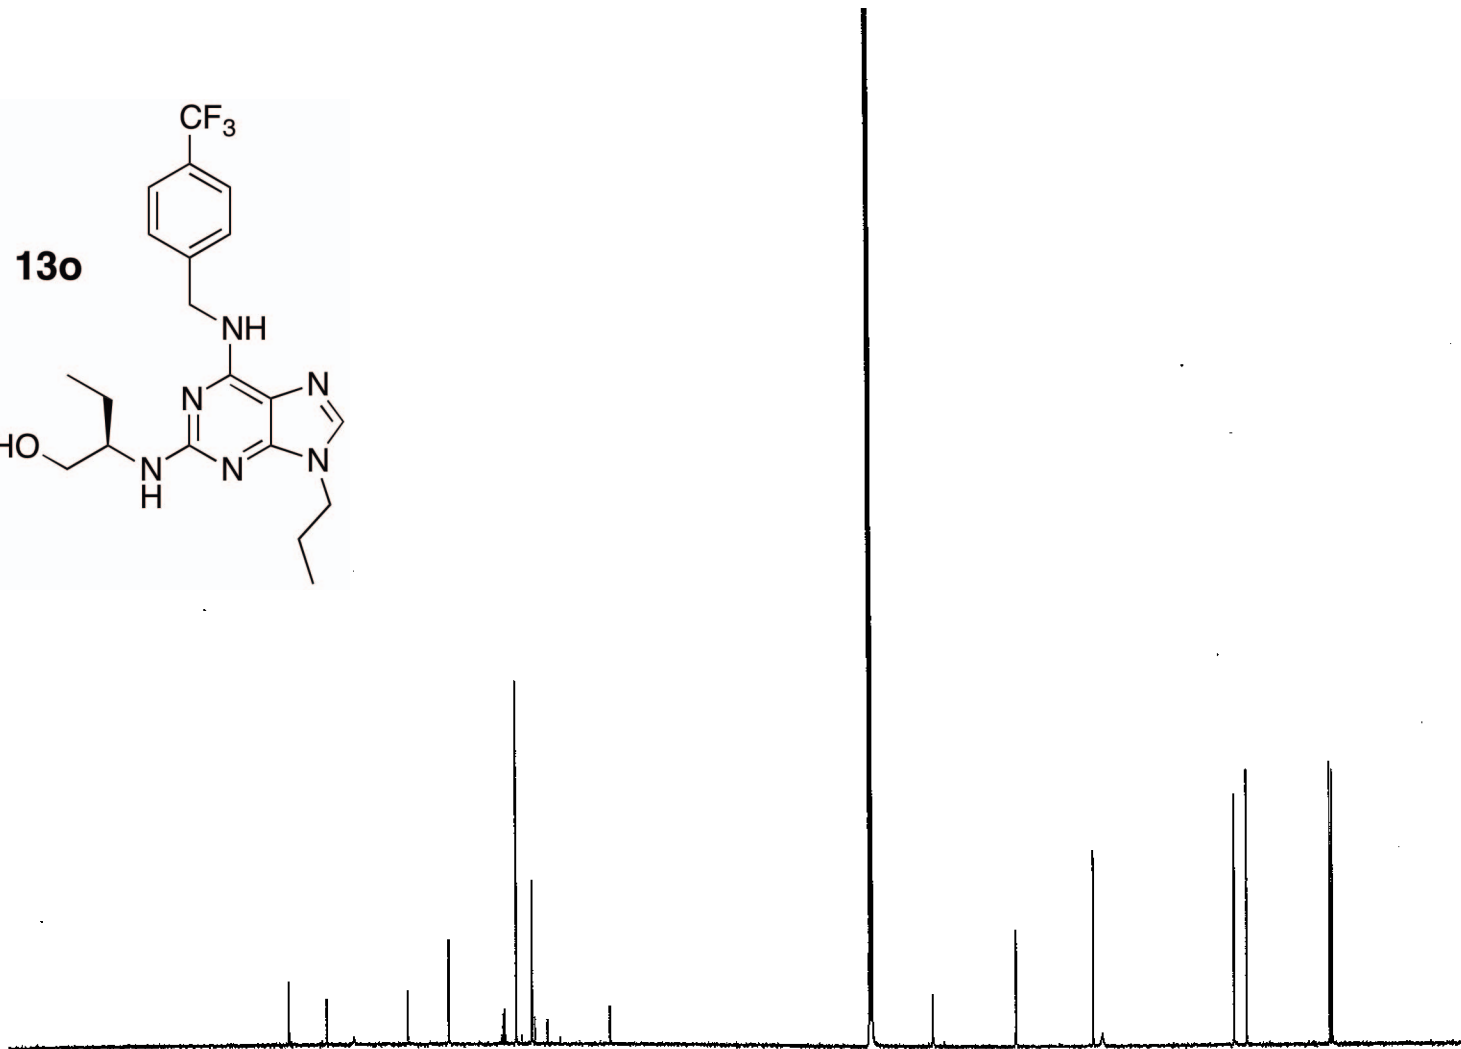

NAME kb-NB-213-35  
EXPNO 2  
PROCNO 1  
Date\_ 20090814  
Time\_ 23.53  
INSTRUM spect  
PROBHD 5 mm CPTCI 1H-  
PULPROG zgpg30  
TD 65536  
SOLVENT CDCl3  
NS 1024  
DS 4  
SWH 35971.223 Hz  
FIDRES 0.548877 Hz  
AQ 0.9110143 sec  
RG 18390.4  
DW 13.900 usec  
DE 6.50 usec  
TE 298.0 K  
D1 2.00000000 sec  
D11 0.03000000 sec  
TDO 1

==== CHANNEL f1 =====  
NUC1 13C  
P1 12.00 usec  
PL1 -0.70 dB  
PL1W 82.63385773 W  
SFO1 150.9178988 MHz

==== CHANNEL f2 =====  
CPDPRG2 waltz16  
NUC2 1H  
PCPD2 80.00 usec  
PL2 4.00 dB  
PL12 24.00 dB  
PL13 27.00 dB  
PL2W 7.00000000 W  
PL12W 0.07000000 W  
PL13W 0.03508311 W  
SFO2 600.1324005 MHz  
SI 32768  
SF 150.9028138 MHz  
WDW EM  
SSB 0  
LB 1.00 Hz  
GB 0  
PC 1.40



kb-NB-184-83-1

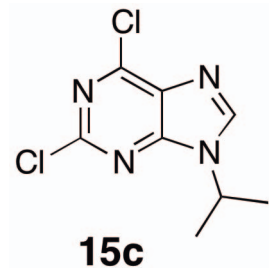

8.178

4.947  
4.936  
4.925  
4.913  
4.902

1.669  
1.658

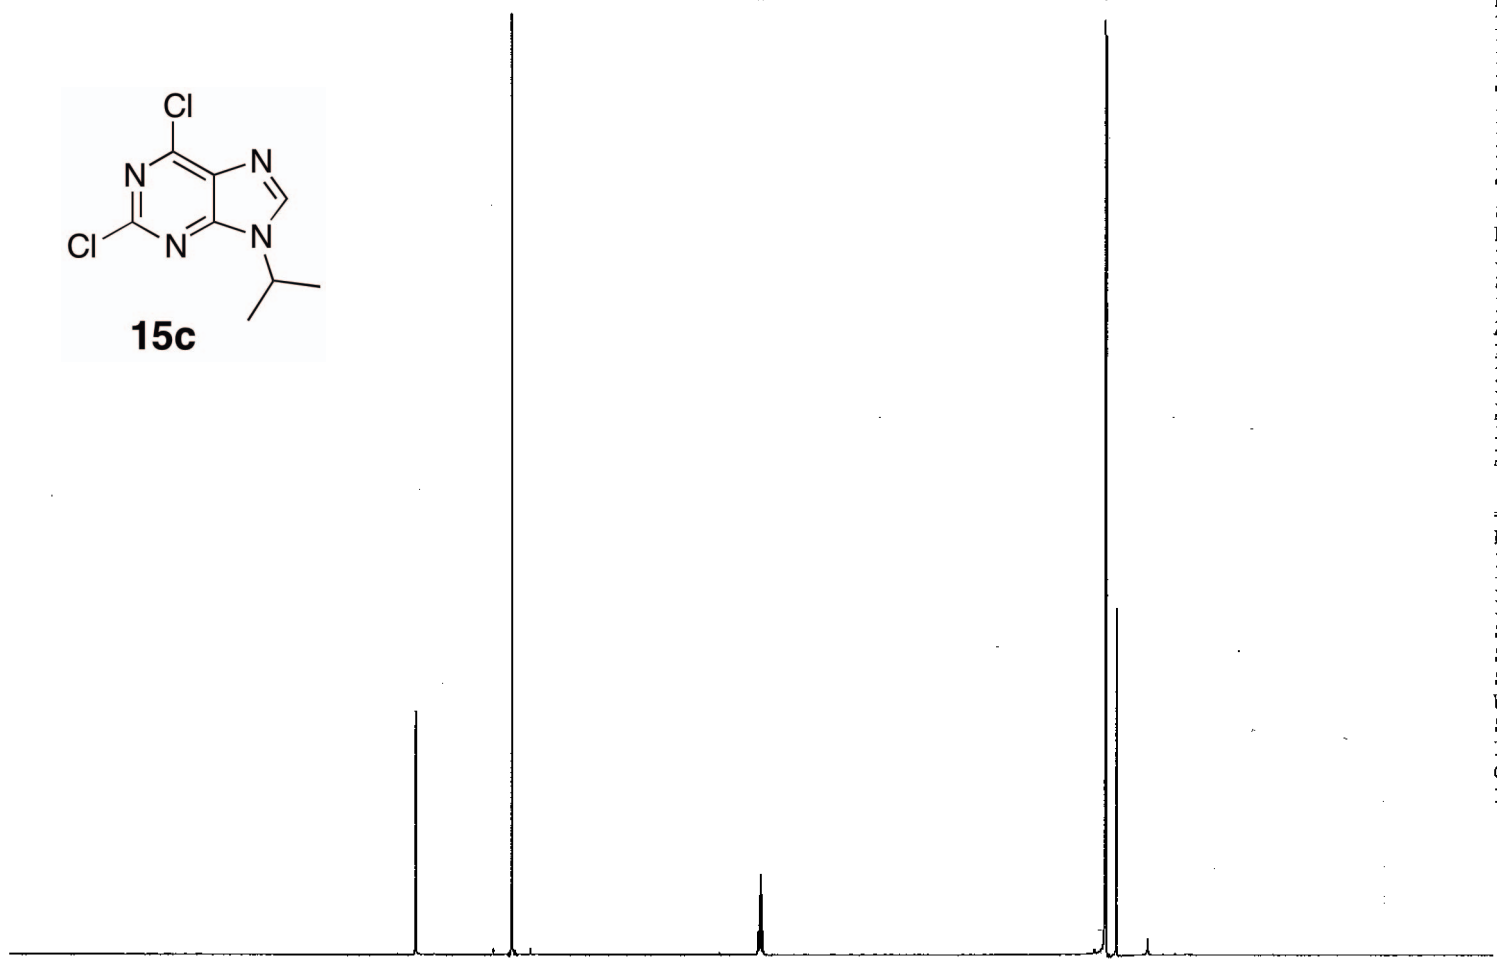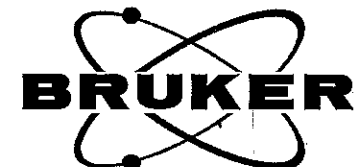

NAME kb-NB-184-83  
EXPNO 1  
PROCNO 1  
Date\_ 20090707  
Time\_ 11.42  
INSTRUM spect  
PROBHD 5 mm CPTCI 1H-  
PULPROG zg30  
TD 65536  
SOLVENT CDC13  
NS 16  
DS 2  
SWH 12376.237 Hz  
FIDRES 0.188846 Hz  
AQ 2.6477449 sec  
RG 645.1  
DW 40.400 usec  
DE 6.50 usec  
TE 297.9 K  
D1 1.00000000 sec  
TD0 1

==== CHANNEL f1 =====  
NUC1 1H  
P1 8.00 usec  
PL1 4.00 dB  
PL1W 7.00000000 W  
SF01 600.1337060 MHz  
SI 32768  
SF 600.1300043 MHz  
WDW EM  
SSB 0  
LB 0.30 Hz  
GB 0  
PC 1.00

11 10 9 8 7 6 5 4 3 2 1 0 -1 ppm

1.00

1.03

6.40

kb-NB-184-81

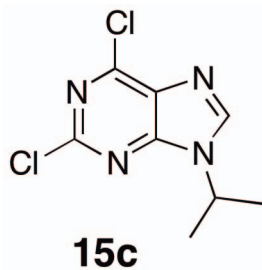

152.67  
152.58  
151.64  
143.52  
131.01

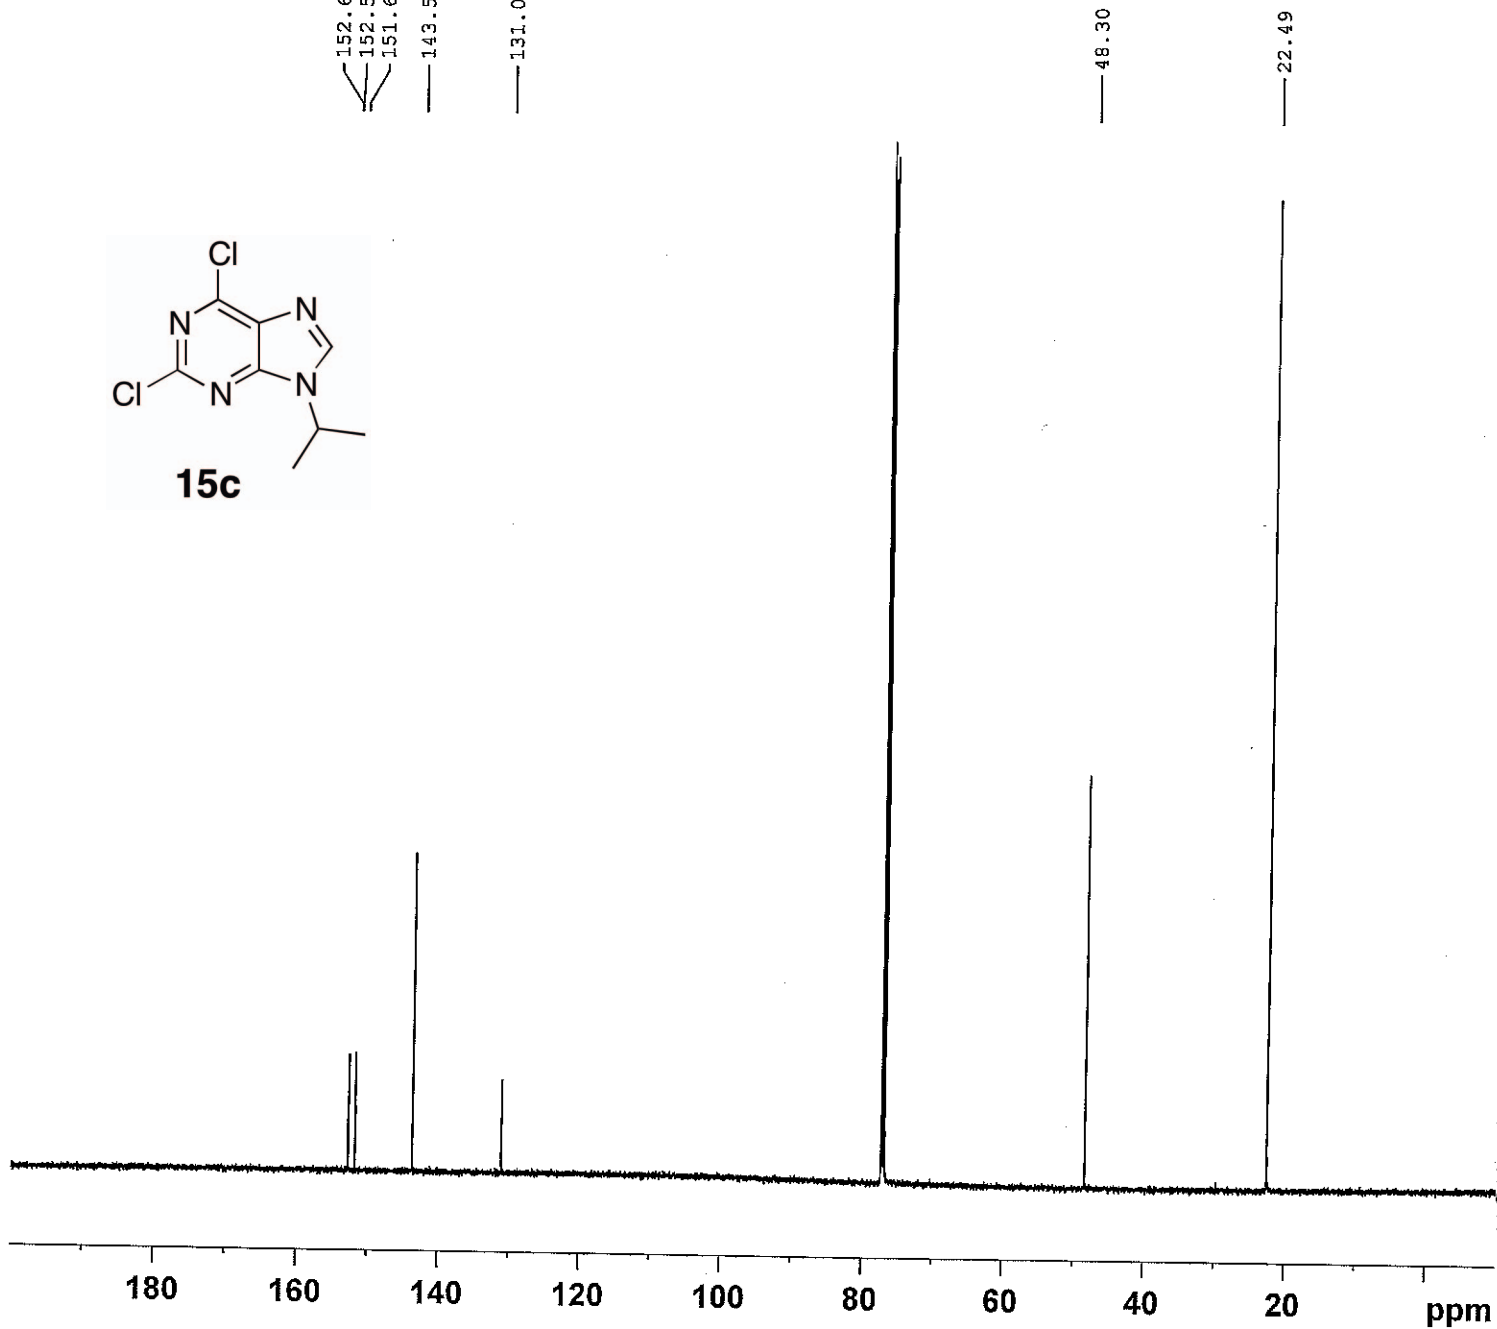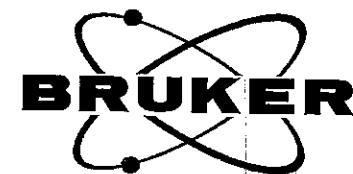

NAME kb-NB-184-81  
EXPNO 2  
PROCNO 1  
Date 20090701  
Time 20.55  
INSTRUM spect  
PROBHD 5 mm CPTCI 1H-  
PULPROG zgpg30  
TD 65536  
SOLVENT CDC13  
NS 254  
DS 4  
SWH 35971.223 Hz  
FIDRES 0.548877 Hz  
AQ 0.9110143 sec  
RG 16384  
DW 13.900 usec  
DE 6.50 usec  
TE 298.0 K  
D1 2.00000000 sec  
D11 0.03000000 sec  
TD0 1

=====  
CHANNEL f1  
=====  
NUC1 13C  
P1 12.00 usec  
PL1 -0.70 dB  
PL1W 82.63385773 W  
SFO1 150.9178988 MHz

=====  
CHANNEL f2  
=====  
CPDPRG2 waltz16  
NUC2 1H  
PCPD2 80.00 usec  
PL2 4.00 dB  
PL12 24.00 dB  
PL13 27.00 dB  
PL2W 7.00000000 W  
PL12W 0.07000000 W  
PL13W 0.03508311 W  
SFO2 600.1324005 MHz  
SI 32768  
SF 150.9028149 MHz  
WDW EM  
SSB 0  
LB 1.00 Hz  
GB 0  
PC 1.40

LSNB189-15-CDC13-301-1H

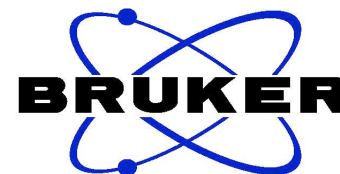

NAME LSNB189-15-CDC13-301-1H  
EXPNO 15  
PROCNO 1  
Date\_ 20090817  
Time 10.41  
INSTRUM spect  
PROBHD 5 mm QNP 1H/1  
PULPROG zg30  
TD 65536  
SOLVENT CDC13  
NS 470  
DS 2  
SWH 6172.839 Hz  
FIDRES 0.094190 Hz  
AQ 5.3084660 sec  
RG 574.7  
DW 81.000 usec  
DE 6.50 usec  
TE 295.3 K  
D1 1.00000000 sec  
TD0 1

===== CHANNEL f1 =====  
NUC1 1H  
P1 5.21 usec  
PL1 0.00 dB  
SFO1 300.0868531 MHz  
SI 32768  
SF 300.0850000 MHz  
WDW EM  
SSB 0  
LB 0.30 Hz  
GB 0  
PC 1.00

— 7.797

— 7.276

— 6.027

4.877  
4.854  
4.831  
4.809  
4.786

3.485  
1.808  
1.786  
1.667  
1.575  
1.537  
1.263  
1.171  
1.155  
1.145  
1.140  
1.130  
1.114  
1.105  
1.089  
0.997  
0.973  
0.949  
0.616

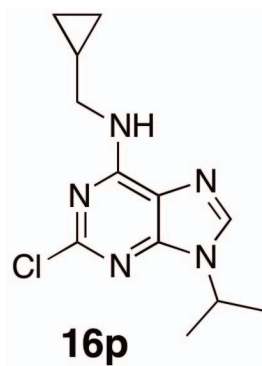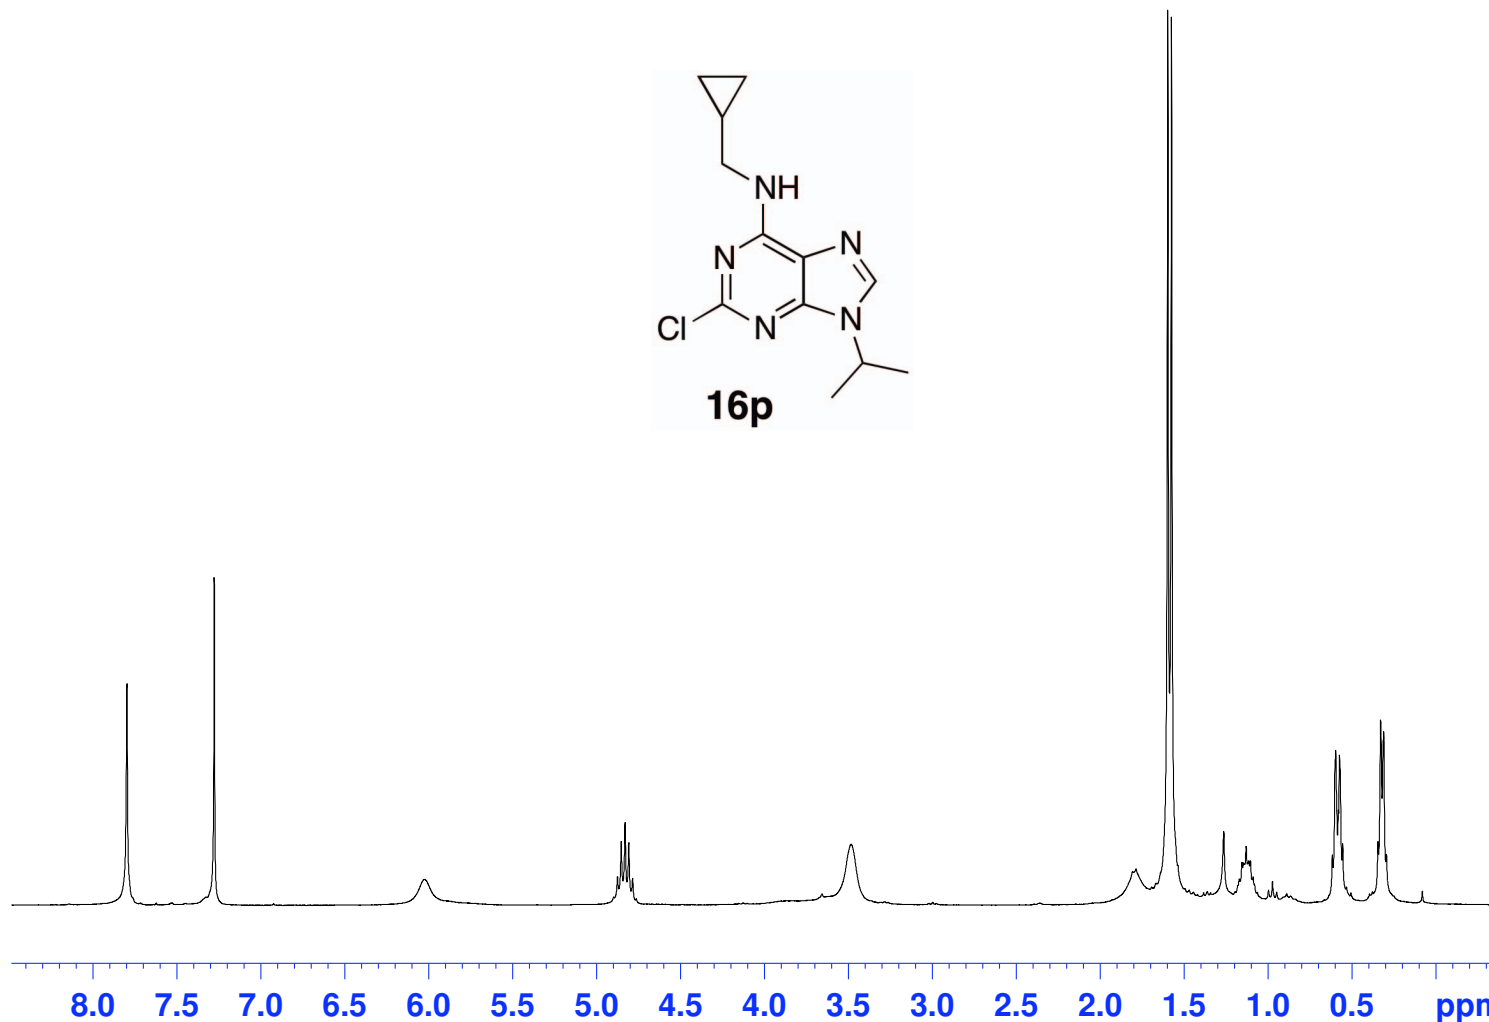

0.98

0.71

1.00

1.51

1.05

6.34

0.49

1.16

0.21

1.95

1.79

0.03

LSNB189-15 in CDCl3, 13C, 301, 8/12/09

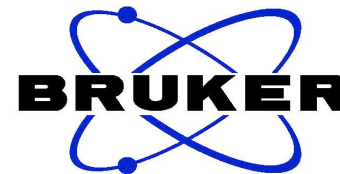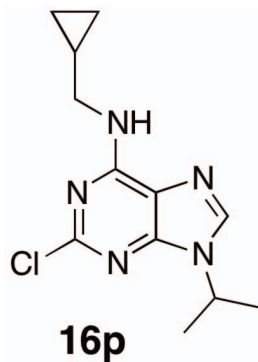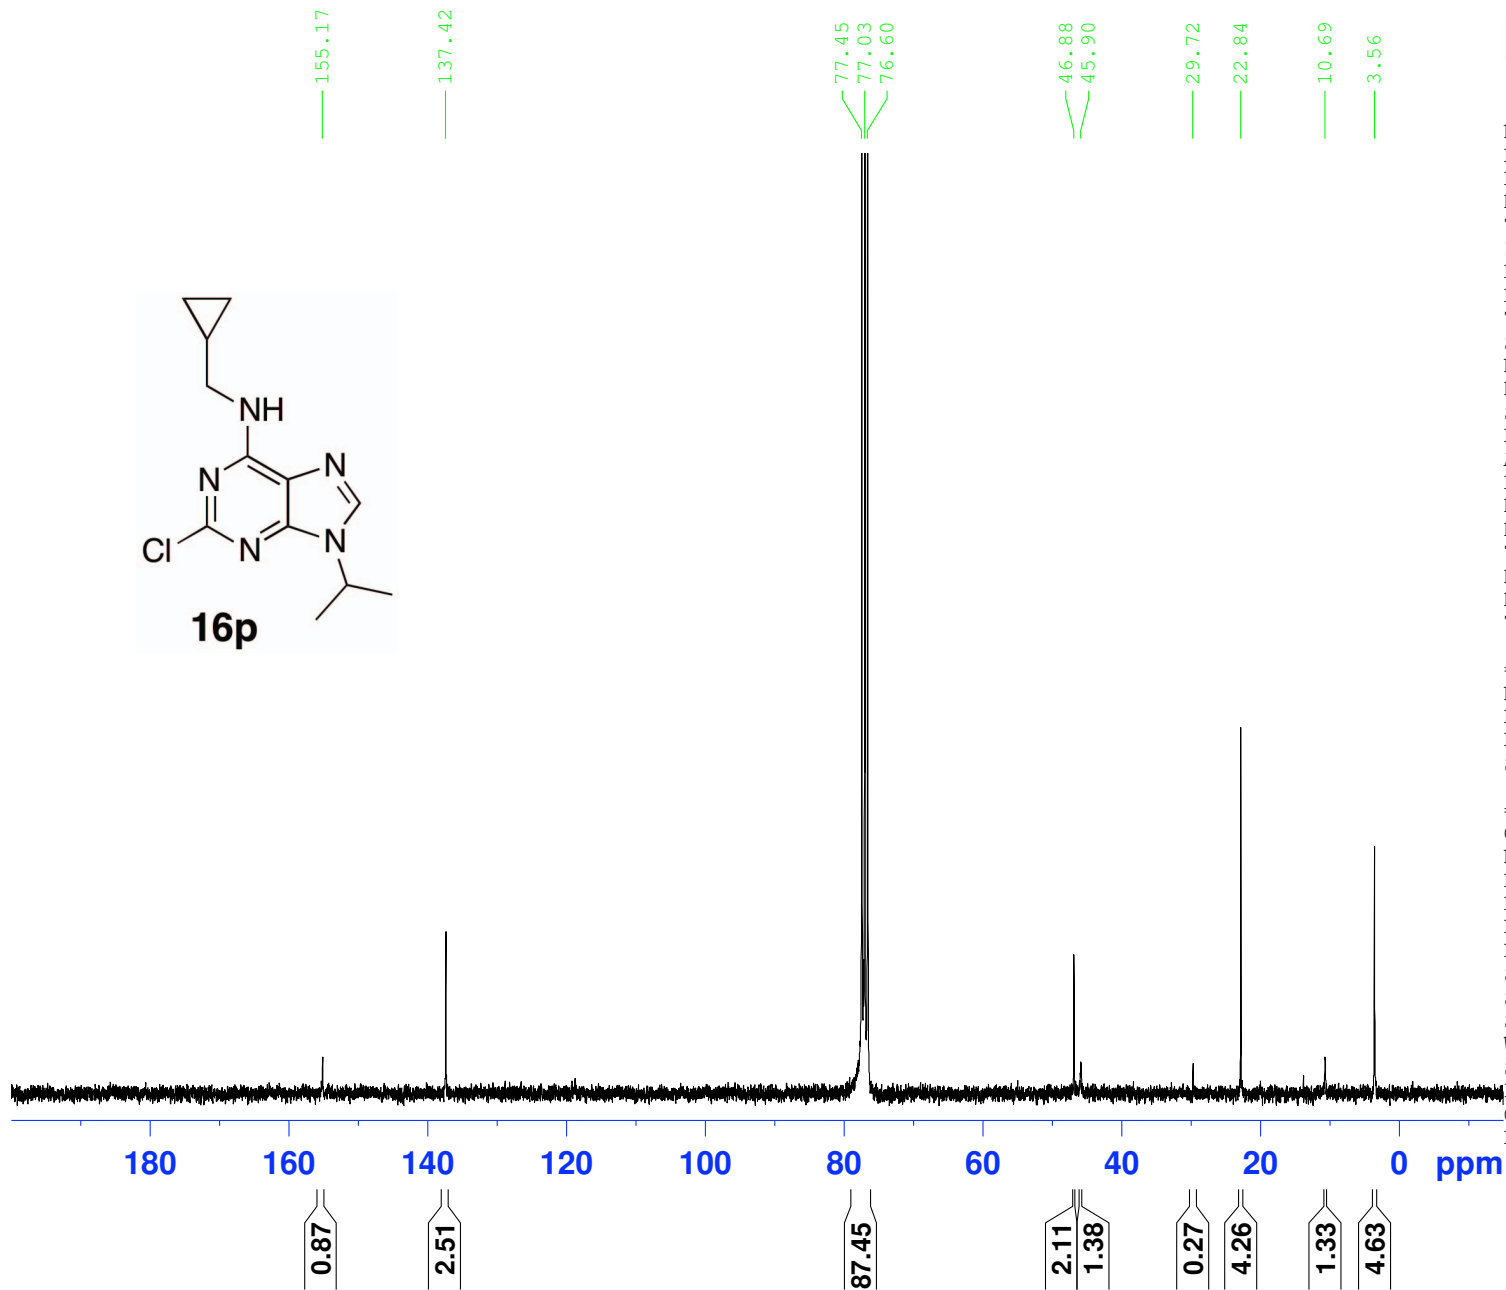

NAME LSNB189-15  
EXPNO 2  
PROCNO 1  
Date\_ 20090812  
Time 22.41  
INSTRUM spect  
PROBHD 5 mm QNP 1H/1  
PULPROG zgpg30  
TD 65536  
SOLVENT CDCl3  
NS 10000  
DS 4  
SWH 17985.611 Hz  
FIDRES 0.274439 Hz  
AQ 1.8219508 sec  
RG 14596.5  
DW 27.800 usec  
DE 6.50 usec  
TE 295.0 K  
D1 2.0000000 sec  
D11 0.0300000 sec  
TD0 25

==== CHANNEL f1 =====  
NUC1 13C  
P1 10.00 usec  
PL1 0.00 dB  
SFO1 75.4639789 MHz  
  
==== CHANNEL f2 =====  
CPDPRG2 waltz16  
NUC2 1H  
PCPD2 100.00 usec  
PL2 0.00 dB  
PL12 25.66 dB  
PL13 120.00 dB  
SFO2 300.0862003 MHz  
SI 32768  
SF 75.4564330 MHz  
WDW EM  
SSB 0  
LB 1.00 Hz  
GB 0  
PC 1.40

LSNB189-16-CDC13-301-1H

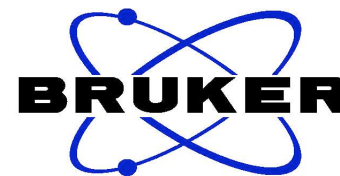

— 7.785  
— 7.518  
— 7.277

< 6.205  
— 6.180  
— 5.852

< 4.906  
< 4.620  
< 4.599  
< 4.578  
< 4.557  
< 3.894  
< 3.853  
< 3.818  
< 3.670  
< 3.643  
< 3.609  
< 3.402

< 1.665  
< 1.642  
< 1.582  
< 1.539  
< 1.520  
< 1.256  
< 1.090  
< 1.053  
< 1.032  
< 1.010  
< 0.949  
< 0.881  
< 0.858  
< 0.551  
< 0.532  
< 0.276

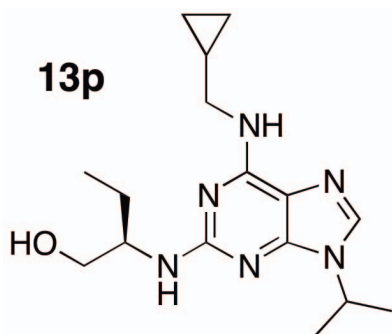

NAME LSNB189-16-CDC13-301-1H  
EXPNO 16  
PROCNO 1  
Date\_ 20090818  
Time 14.06  
INSTRUM spect  
PROBHD 5 mm QNP 1H/1  
PULPROG zg30  
TD 65536  
SOLVENT CDC13  
NS 32  
DS 2  
SWH 6172.839 Hz  
FIDRES 0.094190 Hz  
AQ 5.3084660 sec  
RG 181  
DW 81.000 usec  
DE 6.50 usec  
TE 294.9 K  
D1 1.00000000 sec  
TD0 1

===== CHANNEL f1 =====  
NUC1 1H  
P1 5.21 usec  
PL1 0.00 dB  
SFO1 300.0868531 MHz  
SI 32768  
SF 300.0850000 MHz  
WDW EM  
SSB 0  
LB 0.30 Hz  
GB 0  
PC 1.00

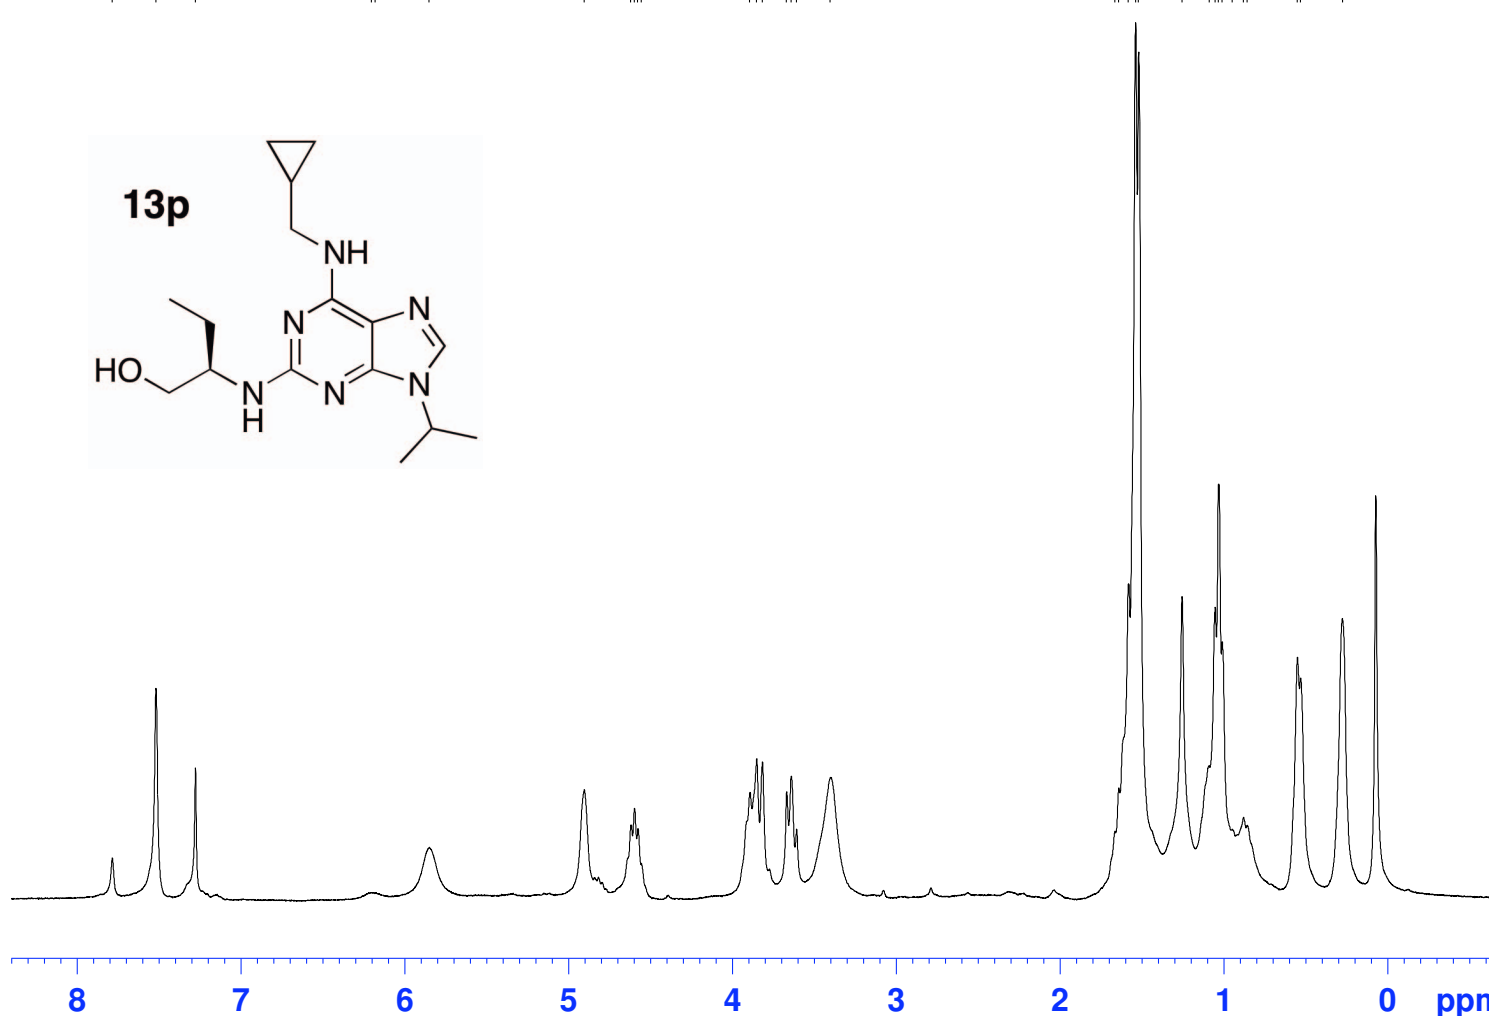

0.09  
0.48

0.04  
0.41

0.45  
0.47

1.00  
0.55  
0.99

4.68  
1.37  
2.34  
0.73  
1.17  
1.19  
0.84

LSNB189-16-CDC13-301-13C



NAME LSNB189-16-CDC13-301-13C  
EXPNO 16  
PROCNO 1  
Date\_ 20090818  
Time 14.13  
INSTRUM spect  
PROBHD 5 mm QNP 1H/1  
PULPROG zgpg30  
TD 65536  
SOLVENT CDC13  
NS 700  
DS 4  
SWH 17985.611 Hz  
FIDRES 0.274439 Hz  
AQ 1.8219508 sec  
RG 32768  
DW 27.800 usec  
DE 6.50 usec  
TE 295.1 K  
D1 2.00000000 sec  
D11 0.03000000 sec  
TD0 1

===== CHANNEL f1 =====  
NUC1 13C  
P1 10.00 usec  
PL1 0.00 dB  
SFO1 75.4639789 MHz

===== CHANNEL f2 =====  
CPDPRG2 waltz16  
NUC2 1H  
PCPD2 100.00 usec  
PL2 0.00 dB  
PL12 25.66 dB  
PL13 120.00 dB  
SFO2 300.0862003 MHz  
SI 32768  
SF 75.4564330 MHz  
WDW EM  
SSB 0  
LB 1.00 Hz  
GB 0  
PC 1.40

160.09  
154.88  
134.36  
114.55  
77.47  
76.62  
68.65  
56.40  
46.87  
46.37  
45.53  
29.70  
25.05  
22.82  
22.61  
22.54  
10.97  
10.84  
3.50  
1.02

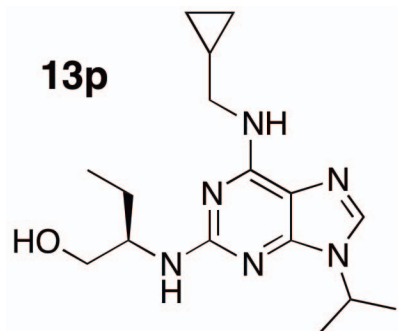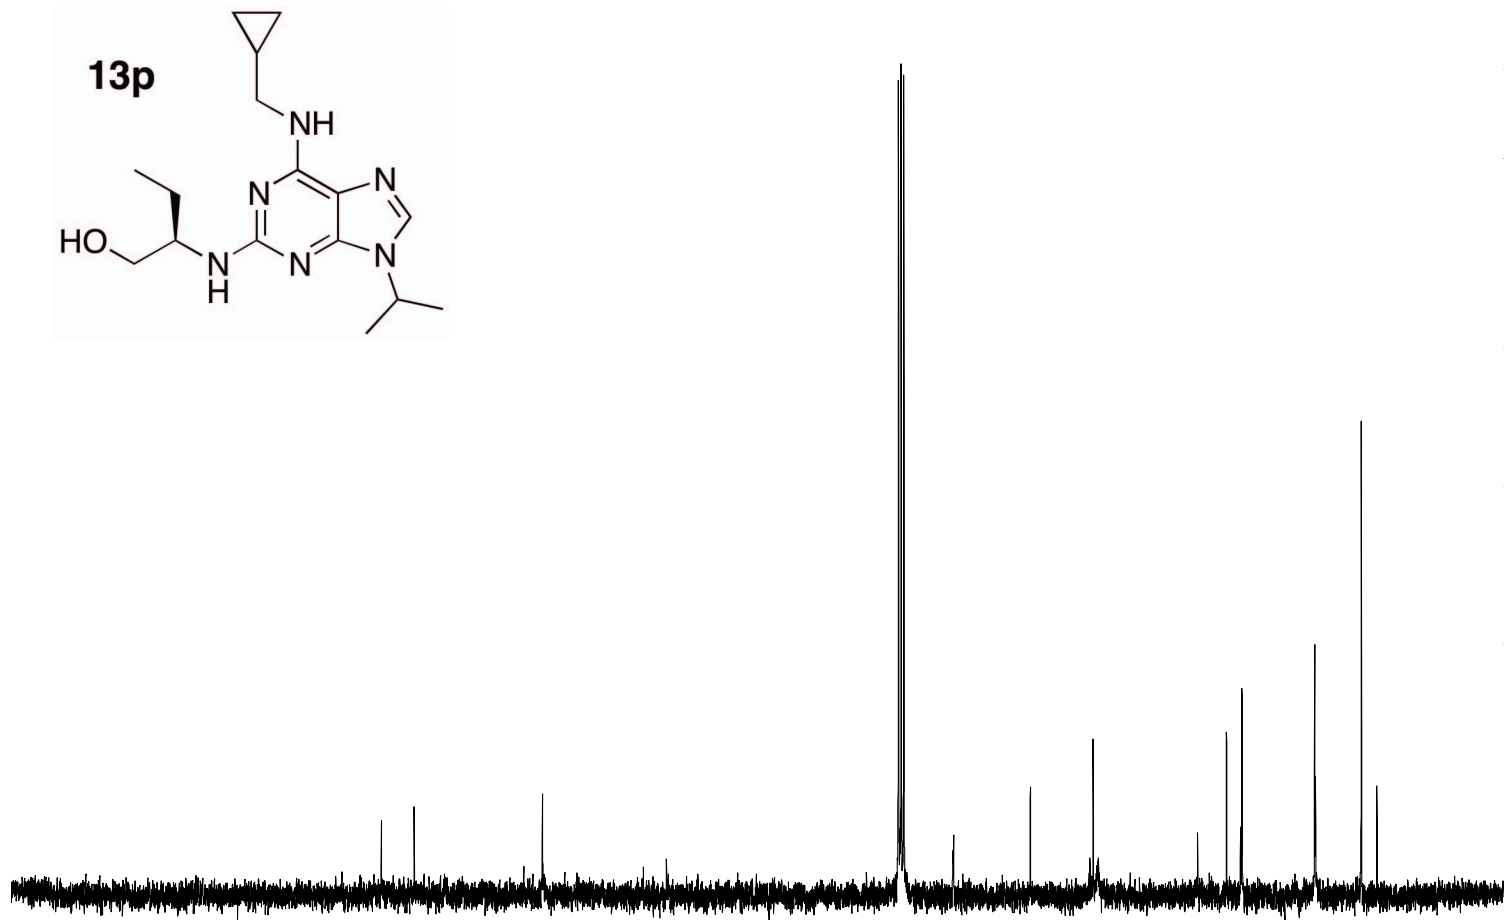

200 180 160 140 120 100 80 60 40 20 0 ppm

LSNB189-09-301b-CDC13-1H

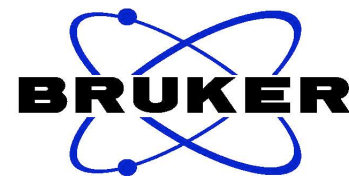

7.325  
7.322  
7.310  
7.302  
7.274  
7.264  
7.249  
7.238  
7.228  
7.215

— 5.986

4.872  
4.849  
4.827  
4.804  
4.782

— 3.911

3.019  
2.995  
2.972

— 2.184

1.763  
1.591  
1.569

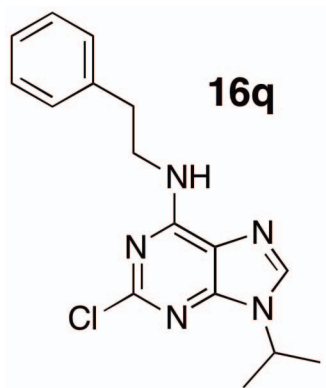

NAME LSNB189-09-301b-CDC13-1H  
EXPNO 9  
PROCNO 1  
Date\_ 20090720  
Time 14.42  
INSTRUM spect  
PROBHD 5 mm Multinucl  
PULPROG zg30  
TD 32768  
SOLVENT CDC13  
NS 16  
DS 2  
SWH 6188.119 Hz  
FIDRES 0.188846 Hz  
AQ 2.6477044 sec  
RG 228  
DW 80.800 usec  
DE 6.50 usec  
TE 292.9 K  
D1 1.00000000 sec  
TD0 1

===== CHANNEL f1 =====  
NUC1 1H  
P1 13.20 usec  
PL1 -2.00 dB  
PL1W 18.20942116 W  
SF01 300.2318540 MHz  
SI 32768  
SF 300.2300000 MHz  
WDW EM  
SSB 0  
LB 0.10 Hz  
GB 0  
PC 1.00

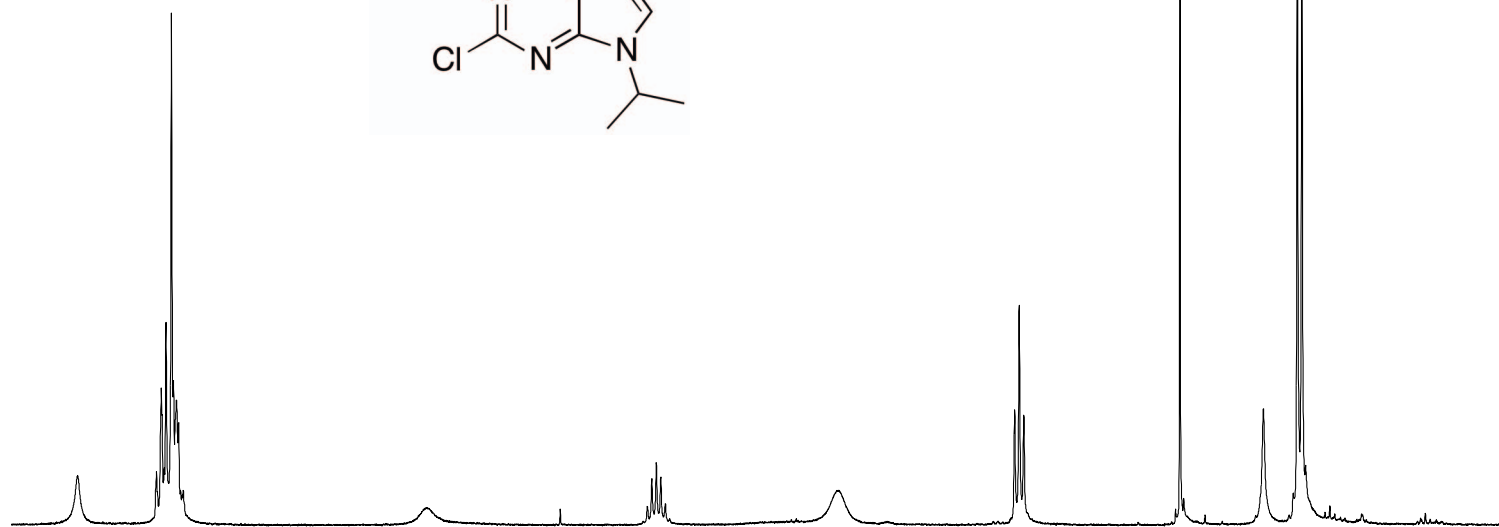

1.00

6.49

0.79

1.08

1.69

2.28

1.87

1.35

6.03

LSNB189-09-CDC13-301-13C

155.26  
149.68  
138.78  
137.48  
128.85  
128.61  
126.48  
118.85

77.52  
77.10  
76.67

46.84  
41.95  
35.60

22.83

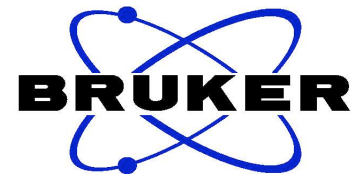

NAME LSNB189-09-CDC13-301-13C  
EXPNO 9  
PROCNO 1  
Date\_ 20090804  
Time 15.59  
INSTRUM spect  
PROBHD 5 mm QNP 1H/1  
PULPROG zgpg30  
TD 65536  
SOLVENT CDC13  
NS 650  
DS 4  
SWH 17985.611 Hz  
FIDRES 0.274439 Hz  
AQ 1.8219508 sec  
RG 13004  
DW 27.800 usec  
DE 6.50 usec  
TE 294.7 K  
D1 2.00000000 sec  
D11 0.03000000 sec  
TD0 1

===== CHANNEL f1 =====  
NUC1 13C  
P1 10.00 usec  
PL1 0.00 dB  
SFO1 75.4639789 MHz

===== CHANNEL f2 =====  
CPDPRG2 waltz16  
NUC2 1H  
PCPD2 100.00 usec  
PL2 0.00 dB  
PL12 25.66 dB  
PL13 120.00 dB  
SFO2 300.0862003 MHz  
SI 32768  
SF 75.4564330 MHz  
WDW EM  
SSB 0  
LB 1.00 Hz  
GB 0  
PC 1.40

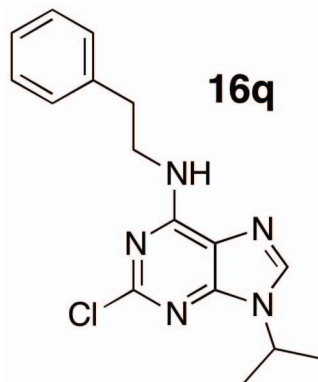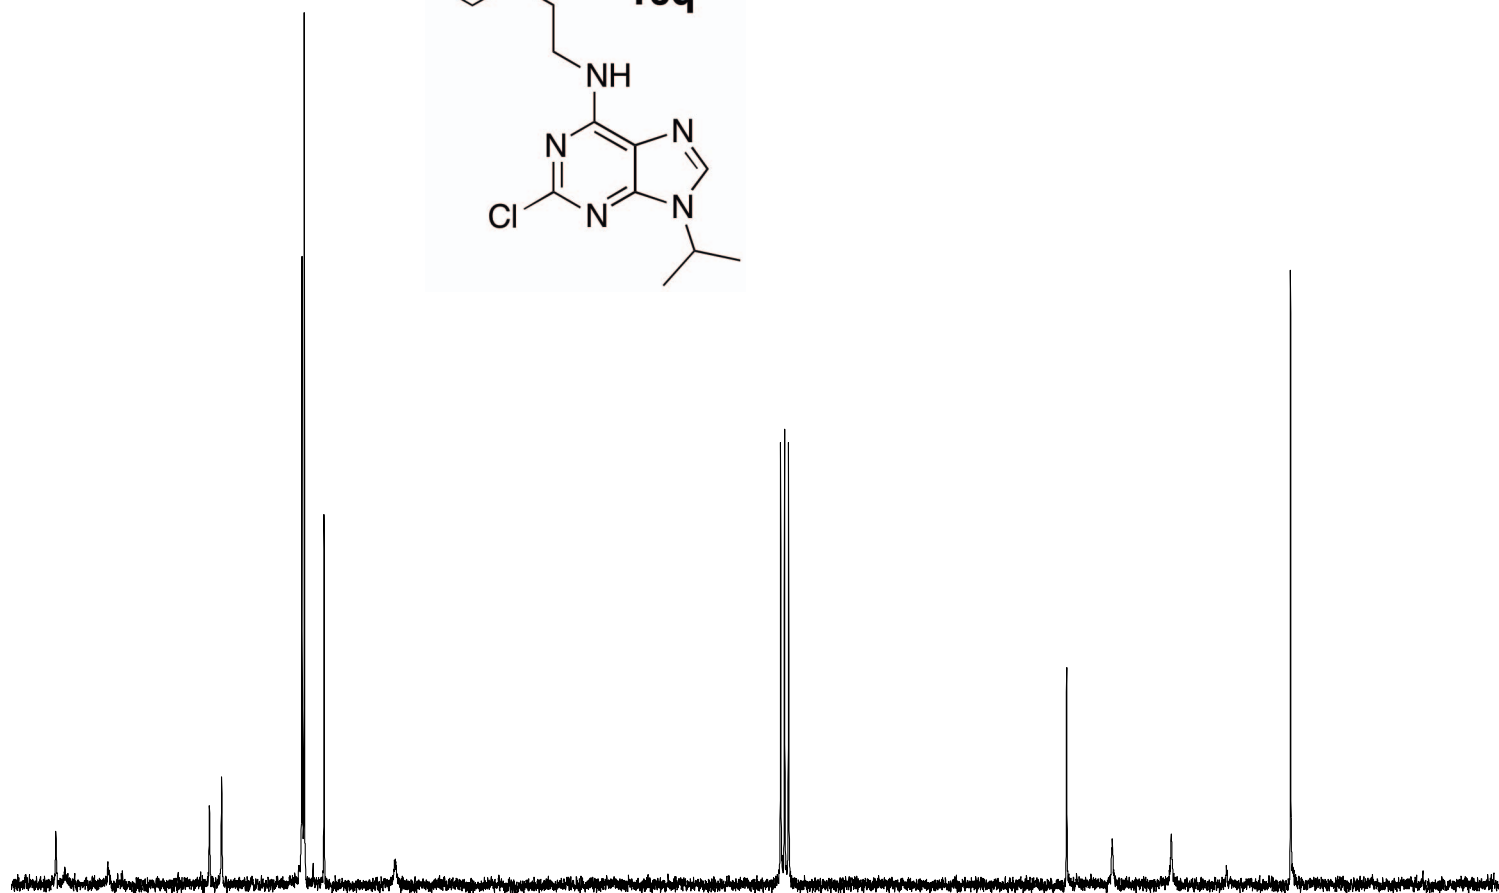

150 140 130 120 110 100 90 80 70 60 50 40 30 20 ppm



LSNB189-10-yellow oil-CDC13-301-1H

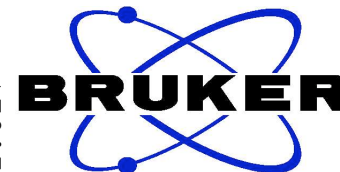

7.491  
7.342  
7.318  
7.294  
7.275  
7.249  
7.226  
7.203  
7.028  
4.899  
4.880  
4.651  
4.628  
4.606  
4.583  
3.943  
3.918  
3.896  
3.877  
3.870  
3.842  
3.834  
3.690  
3.664  
3.655  
3.629  
3.481  
2.989  
2.965  
2.941  
1.668  
1.644  
1.634  
1.622  
1.609  
1.585  
1.548  
1.526  
1.488  
1.272  
1.115  
1.077  
1.052  
1.027

```
NAME LSNB189-10-yellow oil-CDC13-301-1H
EXPNO 10
PROCNO 1
Date_ 20090724
Time 10.11
INSTRUM spect
PROBHD 5 mm QNP 1H/1
PULPROG zg30
TD 65536
SOLVENT CDC13
NS 16
DS 2
SWH 6172.839 Hz
FIDRES 0.094190 Hz
AQ 5.3084660 sec
RG 256
DW 81.000 usec
DE 6.50 usec
TE 300.0 K
D1 1.00000000 sec
TDO 1

===== CHANNEL f1 =====
NUC1 1H
P1 5.21 usec
PL1 0.00 dB
SF01 300.0868531 MHz
SI 32768
SF 300.0850000 MHz
WDW EM
SSB 0
LB 0.30 Hz
GB 0
PC 1.00
```

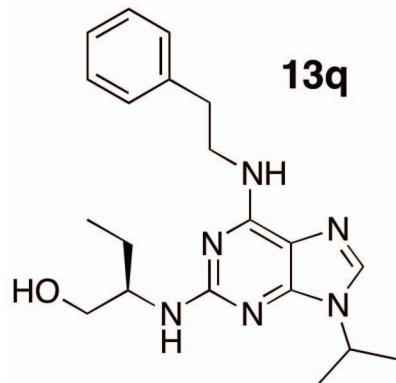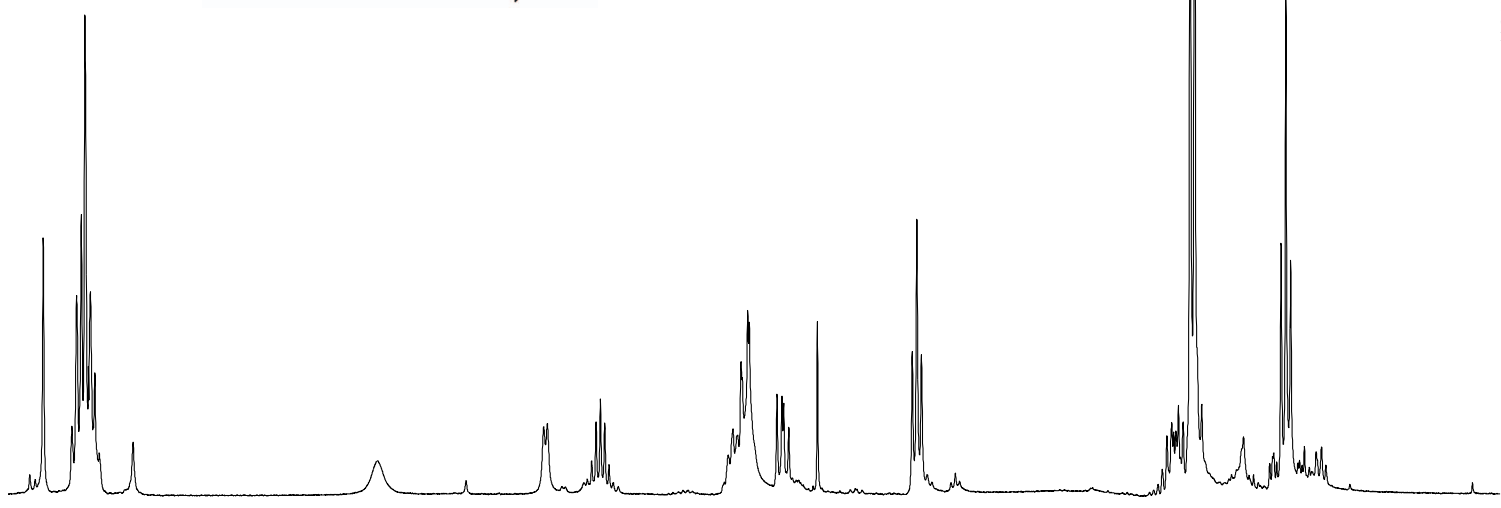

7.5 7.0 6.5 6.0 5.5 5.0 4.5 4.0 3.5 3.0 2.5 2.0 1.5 1.0 0.5 ppm

1.06  
6.82  
0.36  
1.00  
0.99  
1.50  
4.67  
1.46  
0.50  
2.32  
0.26  
1.66  
7.90  
0.65  
3.76

LSNB189\_compound in CDCl3, 13C, 301, 8/6/09

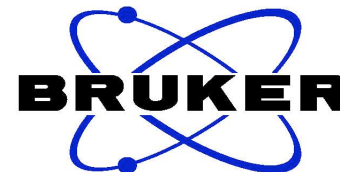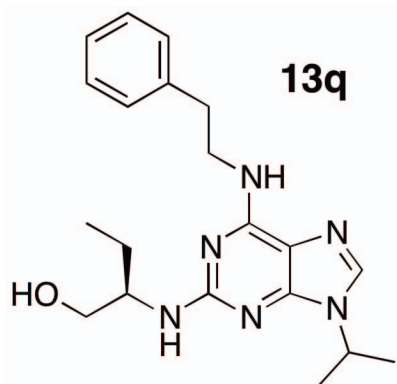

160.35  
155.21  
139.32  
134.71  
129.09  
128.87  
126.70  
114.97  
77.73  
77.30  
76.88  
68.95  
56.70  
46.64  
42.12  
36.26  
29.98  
25.32  
23.05  
22.88  
22.81  
14.41  
11.25  
1.30

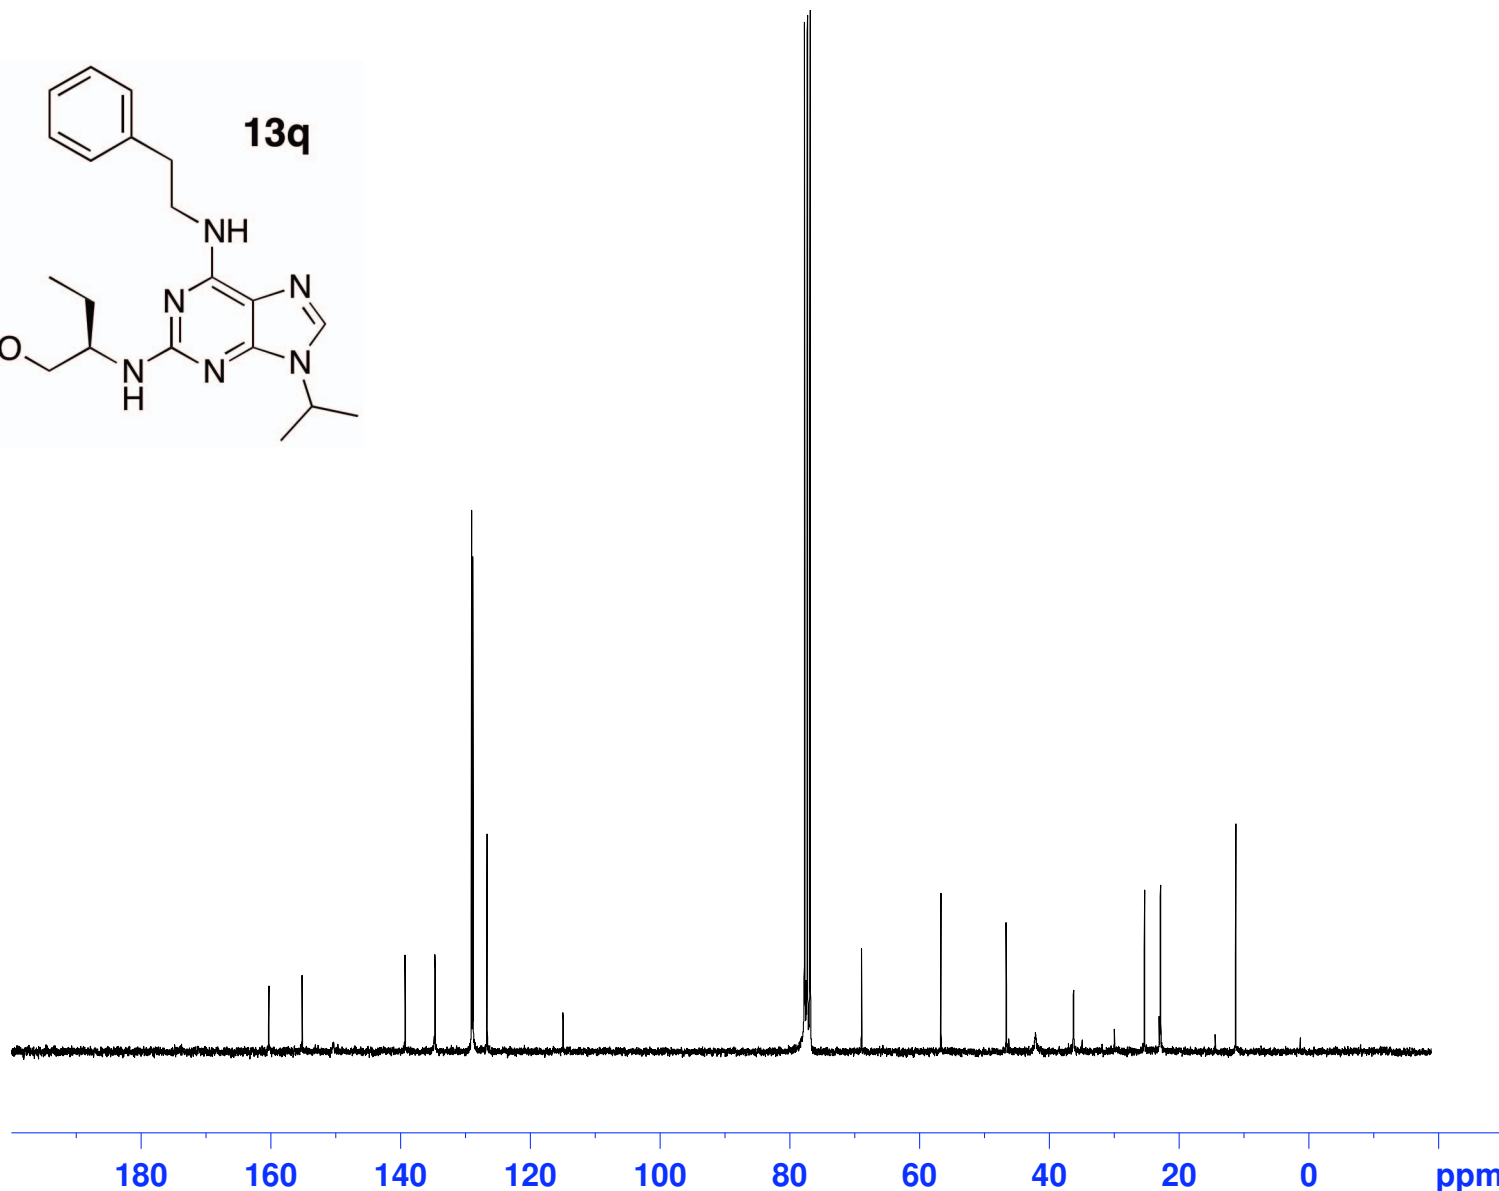

NAME LSNB189\_compound  
EXPNO 2  
PROCNO 1  
Date\_ 20090806  
Time 23.15  
INSTRUM spect  
PROBHD 5 mm QNP 1H/1  
PULPROG zgpg30  
TD 65536  
SOLVENT CDCl3  
NS 9000  
DS 4  
SWH 17985.611 Hz  
FIDRES 0.274439 Hz  
AQ 1.8219508 sec  
RG 32768  
DW 27.800 usec  
DE 6.50 usec  
TE 294.9 K  
D1 2.00000000 sec  
D11 0.03000000 sec  
TD0 10

==== CHANNEL f1 =====  
NUC1 13C  
P1 10.00 usec  
PL1 0.00 dB  
SFO1 75.4639789 MHz

==== CHANNEL f2 =====  
CPDPRG2 waltz16  
NUC2 1H  
PCPD2 100.00 usec  
PL2 0.00 dB  
PL12 25.66 dB  
PL13 120.00 dB  
SFO2 300.0862003 MHz  
SI 32768  
SF 75.4564130 MHz  
WDW EM  
SSB 0  
LB 1.00 Hz  
GB 0  
PC 1.40

LSNB189-11-CDC13-301-1H

8.549  
8.545  
8.534  
8.530  
7.732  
7.726  
7.705  
7.276  
7.260  
7.250  
7.234  
6.624

5.302  
4.884  
4.861  
4.838  
4.816  
4.793  
4.770

2.235  
1.581  
1.559  
1.259

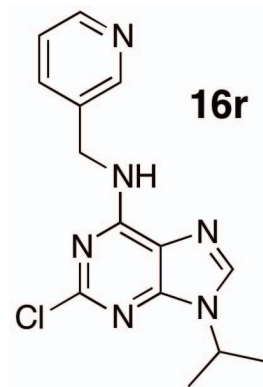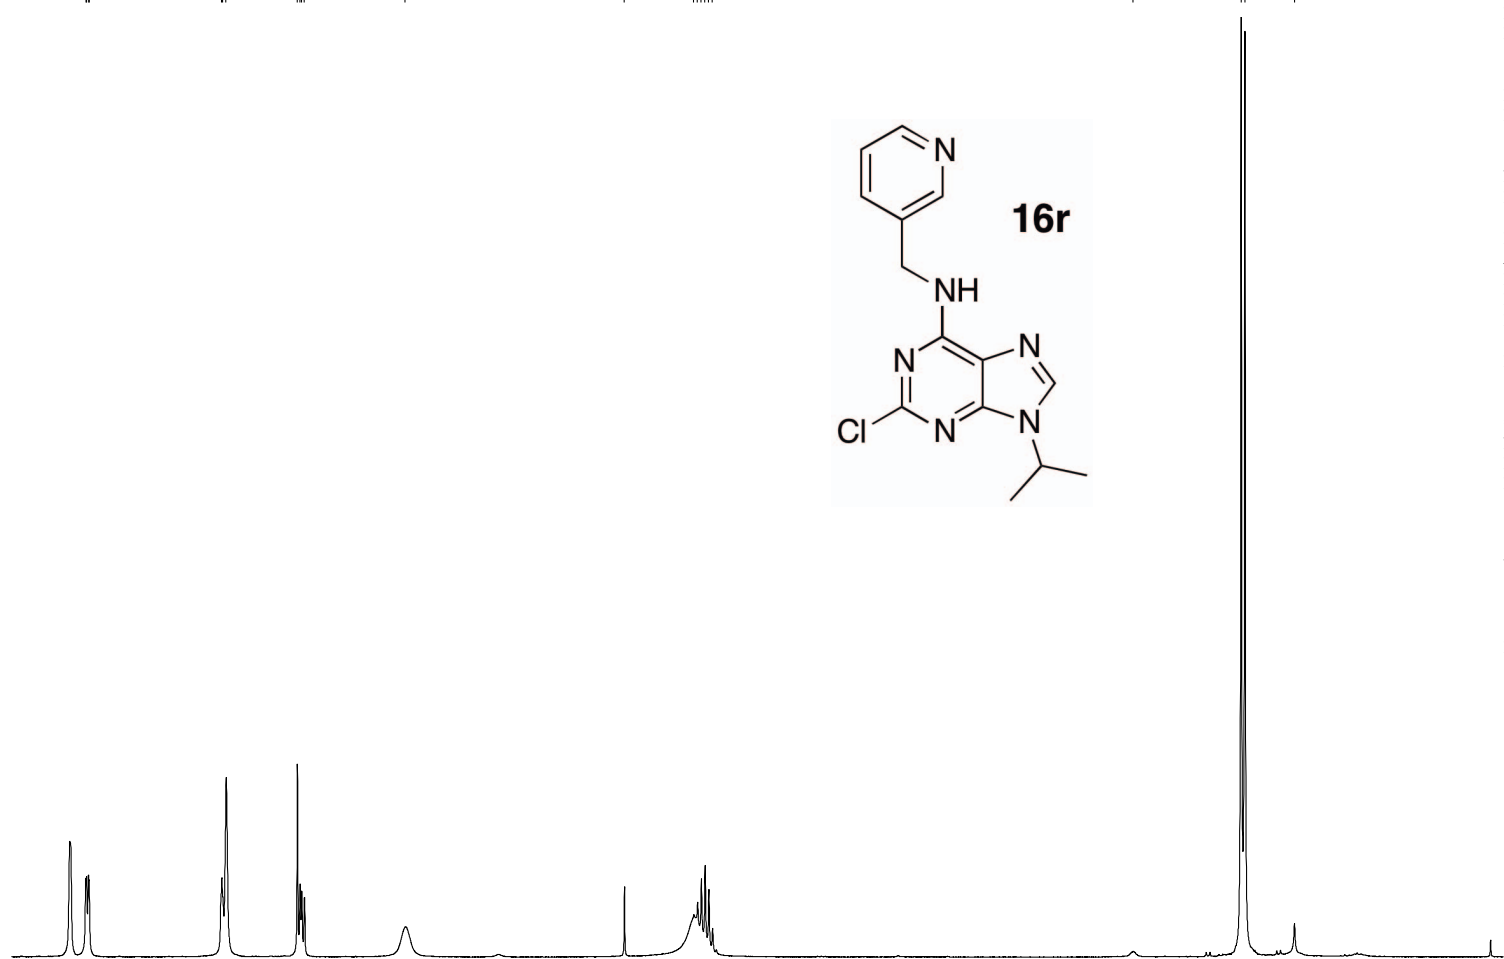

1.15  
1.17

2.32

1.52

1.00

0.21

3.09

0.11

7.50

0.33

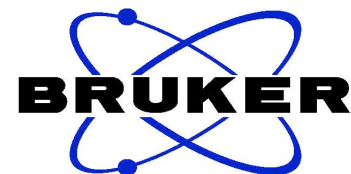

NAME LSNB189-11-CDC13-301-1H  
EXPNO 11  
PROCNO 1  
Date\_ 20090729  
Time 15.24  
INSTRUM spect  
PROBHD 5 mm QNP 1H/1  
PULPROG zg30  
TD 65536  
SOLVENT CDC13  
NS 16  
DS 2  
SWH 6172.839 Hz  
FIDRES 0.094190 Hz  
AQ 5.3084660 sec  
RG 362  
DW 81.000 usec  
DE 6.50 usec  
TE 300.0 K  
D1 1.00000000 sec  
TDO 1

===== CHANNEL f1 =====  
NUC1 1H  
P1 5.21 usec  
PL1 0.00 dB  
SFO1 300.0868531 MHz  
SI 32768  
SF 300.0850000 MHz  
WDW EM  
SSB 0  
LB 0.30 Hz  
GB 0  
PC 1.00

LSNB189-12-crude-CDC13-301-1H

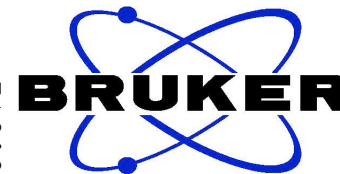

8.605  
8.600  
8.484  
8.480  
8.469  
7.669  
7.643  
7.449  
7.276  
7.215  
7.199  
7.189  
4.976  
4.954  
4.744  
4.604  
4.582  
4.559  
3.761  
3.751  
3.637  
3.613  
3.601  
1.636  
1.611  
1.591  
1.580  
1.555  
1.496  
1.425  
1.364  
1.301  
1.254  
1.012  
0.987  
0.970  
0.962  
0.948  
0.899  
0.877  
0.854  
0.851  
0.826  
0.071

NAME LSNB189-12-crude-CDC13-301-1H  
EXPNO 12  
PROCNO 1  
Date\_ 20090729  
Time 15.05  
INSTRUM spect  
PROBHD 5 mm QNP 1H/1  
PULPROG zg30  
TD 65536  
SOLVENT CDC13  
NS 16  
DS 2  
SWH 6172.839 Hz  
FIDRES 0.094190 Hz  
AQ 5.3084660 sec  
RG 114  
DW 81.000 usec  
DE 6.50 usec  
TE 300.0 K  
D1 1.00000000 sec  
TD0 1

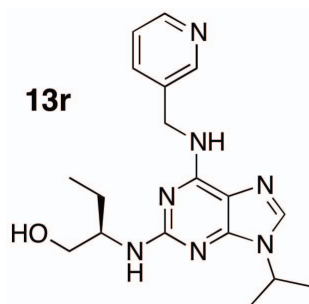

===== CHANNEL f1 =====  
NUC1 1H  
P1 5.21 usec  
PL1 0.00 dB  
SF01 300.0868531 MHz  
SI 32768  
SF 300.0850000 MHz  
WDW EM  
SSB 0  
LB 0.30 Hz  
GB 0  
PC 1.00

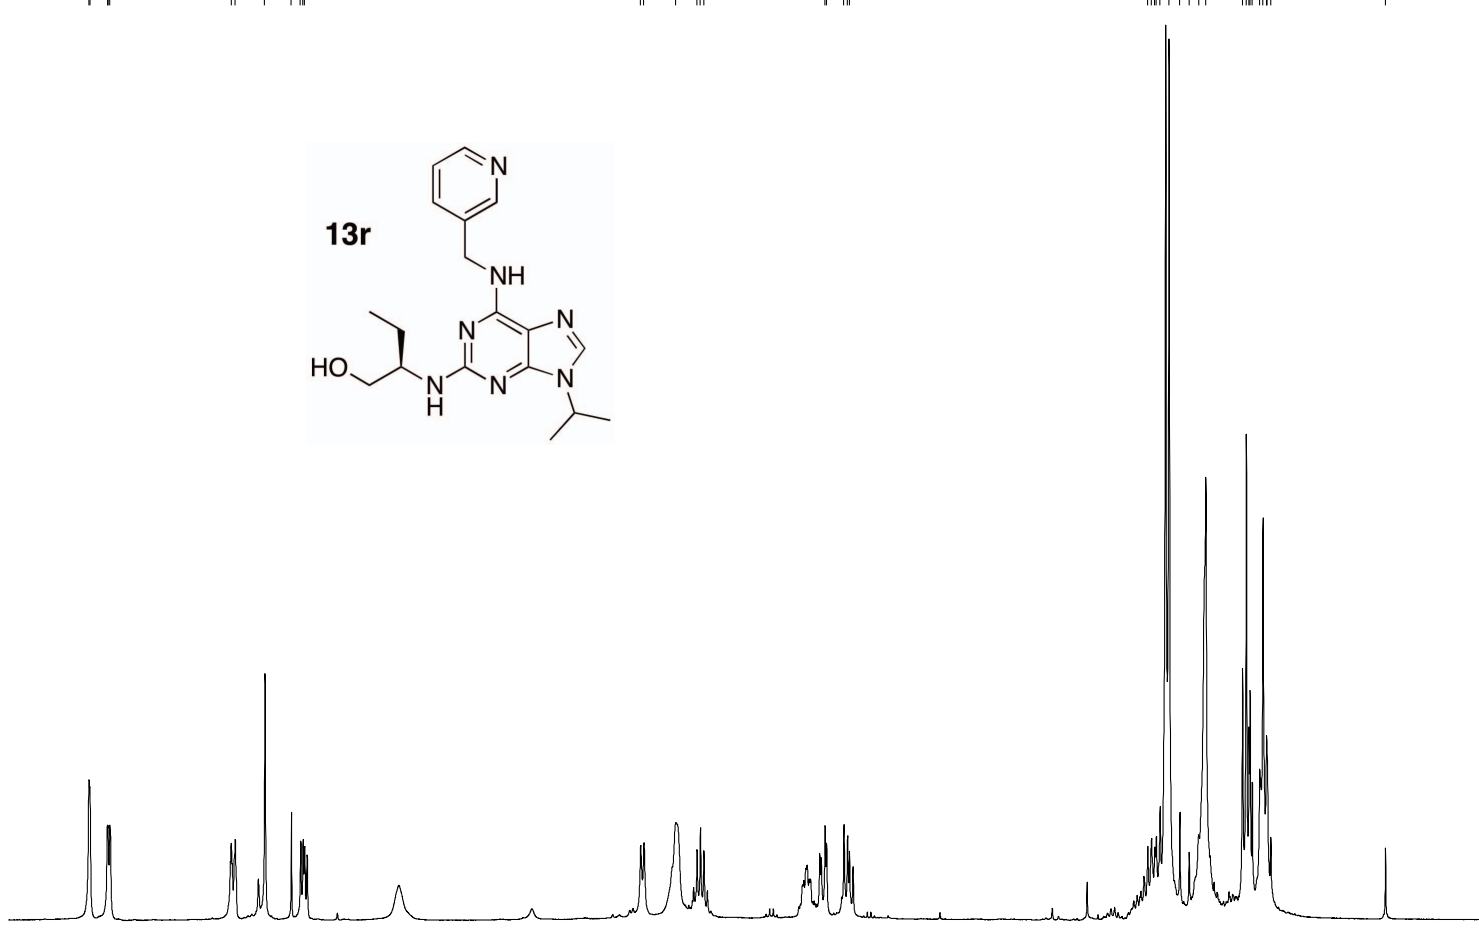

9 8 7 6 5 4 3 2 1 0 ppm

1.20  
1.17  
1.19  
1.31  
0.27  
1.13  
1.00  
0.21  
1.13  
2.31  
1.41  
1.21  
1.33  
1.43  
9.00  
6.66  
5.03  
5.08  
0.23

kb-NB-184-85

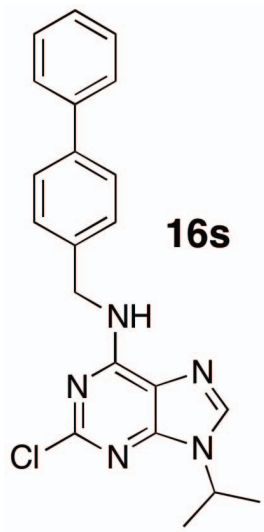

7.676  
7.592  
7.590  
7.585  
7.579  
7.573  
7.572  
7.464  
7.450  
7.436  
7.371  
7.369  
7.357  
7.346  
7.345  
6.552  
4.881  
4.841  
4.830  
4.819  
4.808  
4.797

1.809  
1.565  
1.554

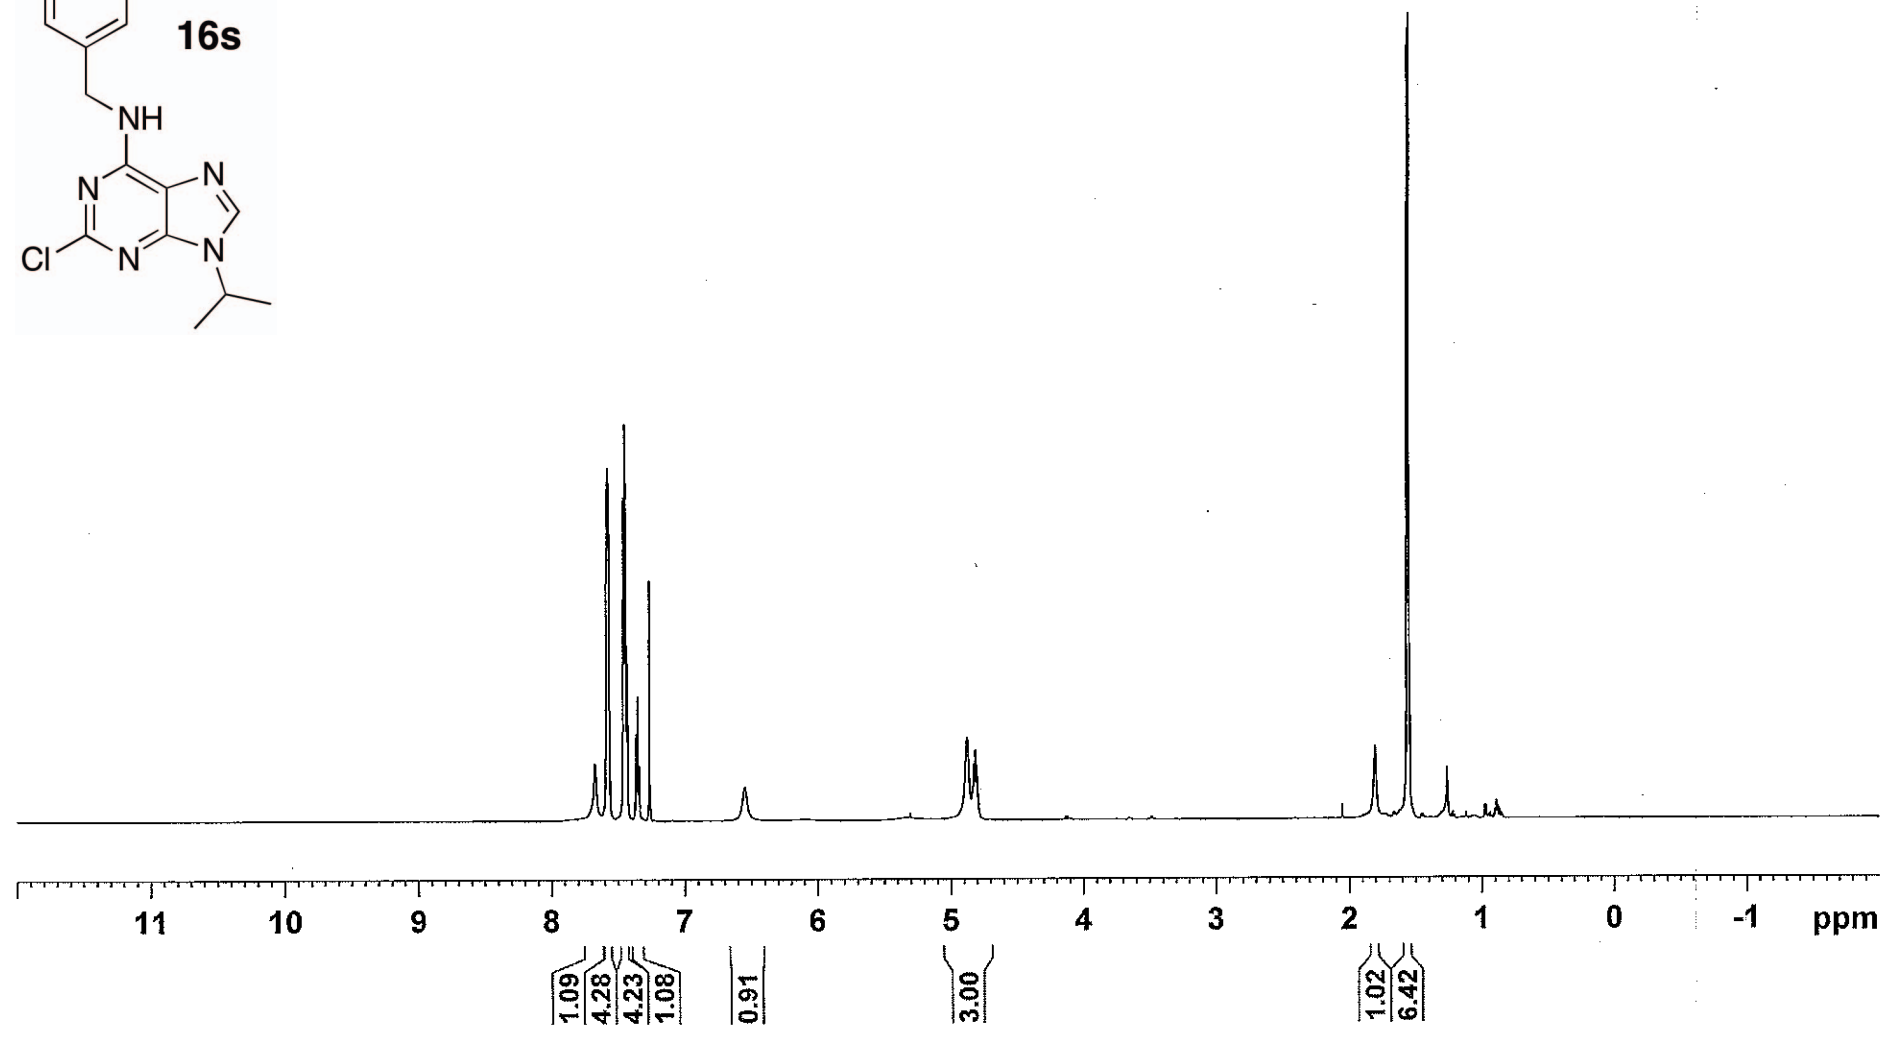

kb-NB-184-85

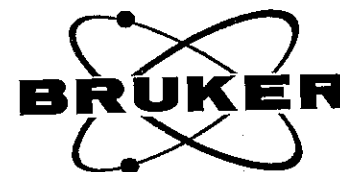

155.07  
154.27  
149.84

140.62  
137.68  
128.78  
128.41  
127.43  
127.35  
127.05  
118.87

46.90  
44.34

22.78

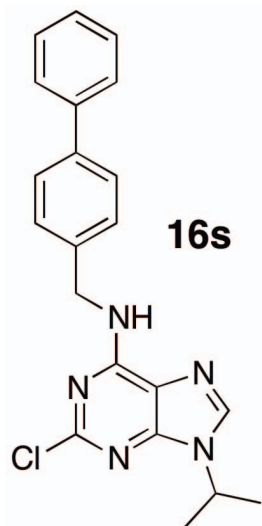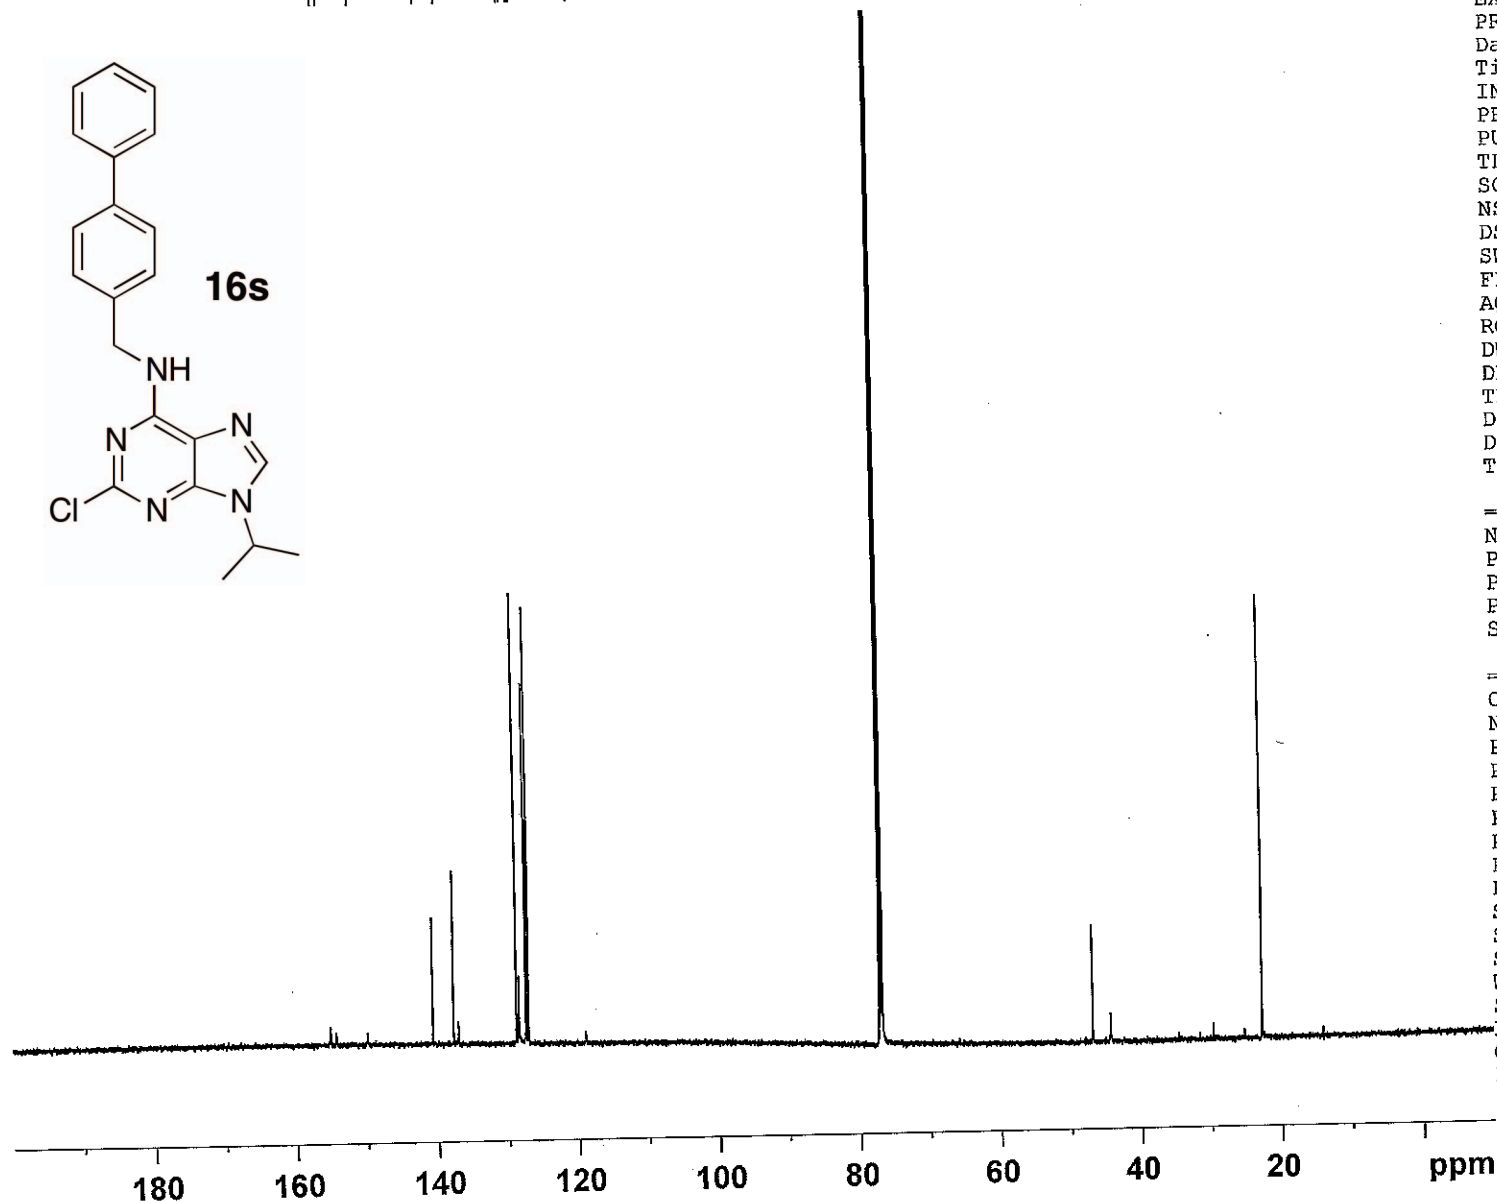

NAME kb-NB-184-85  
EXPNO 3  
PROCNO 1  
Date\_ 20090702  
Time\_ 20.55  
INSTRUM spect  
PROBHD 5 mm CPTCI 1H-  
PULPROG zgpg30  
TD 65536  
SOLVENT CDCl3  
NS 1024  
DS 4  
SWH 35971.223 Hz  
FIDRES 0.548877 Hz  
AQ 0.9110143 sec  
RG 18390.4  
DW 13.900 usec  
DE 6.50 usec  
TE 298.0 K  
D1 2.00000000 sec  
D11 0.03000000 sec  
TD0 1

==== CHANNEL f1 =====  
NUC1 13C  
P1 12.00 usec  
PL1 -0.70 dB  
PL1W 82.63385773 W  
SFO1 150.9178988 MHz

==== CHANNEL f2 =====  
CPDPRG2 waltz16  
NUC2 1H  
PCPD2 80.00 usec  
PL2 4.00 dB  
PL12 24.00 dB  
PL13 27.00 dB  
PL2W 7.00000000 W  
PL12W 0.07000000 W  
PL13W 0.03508311 W  
SFO2 600.1324005 MHz  
SI 32768  
SF 150.9028137 MHz  
WDW EM  
SSB 0  
LB 1.00 Hz  
GB 0  
PC 1.40

kb-NB-184-91

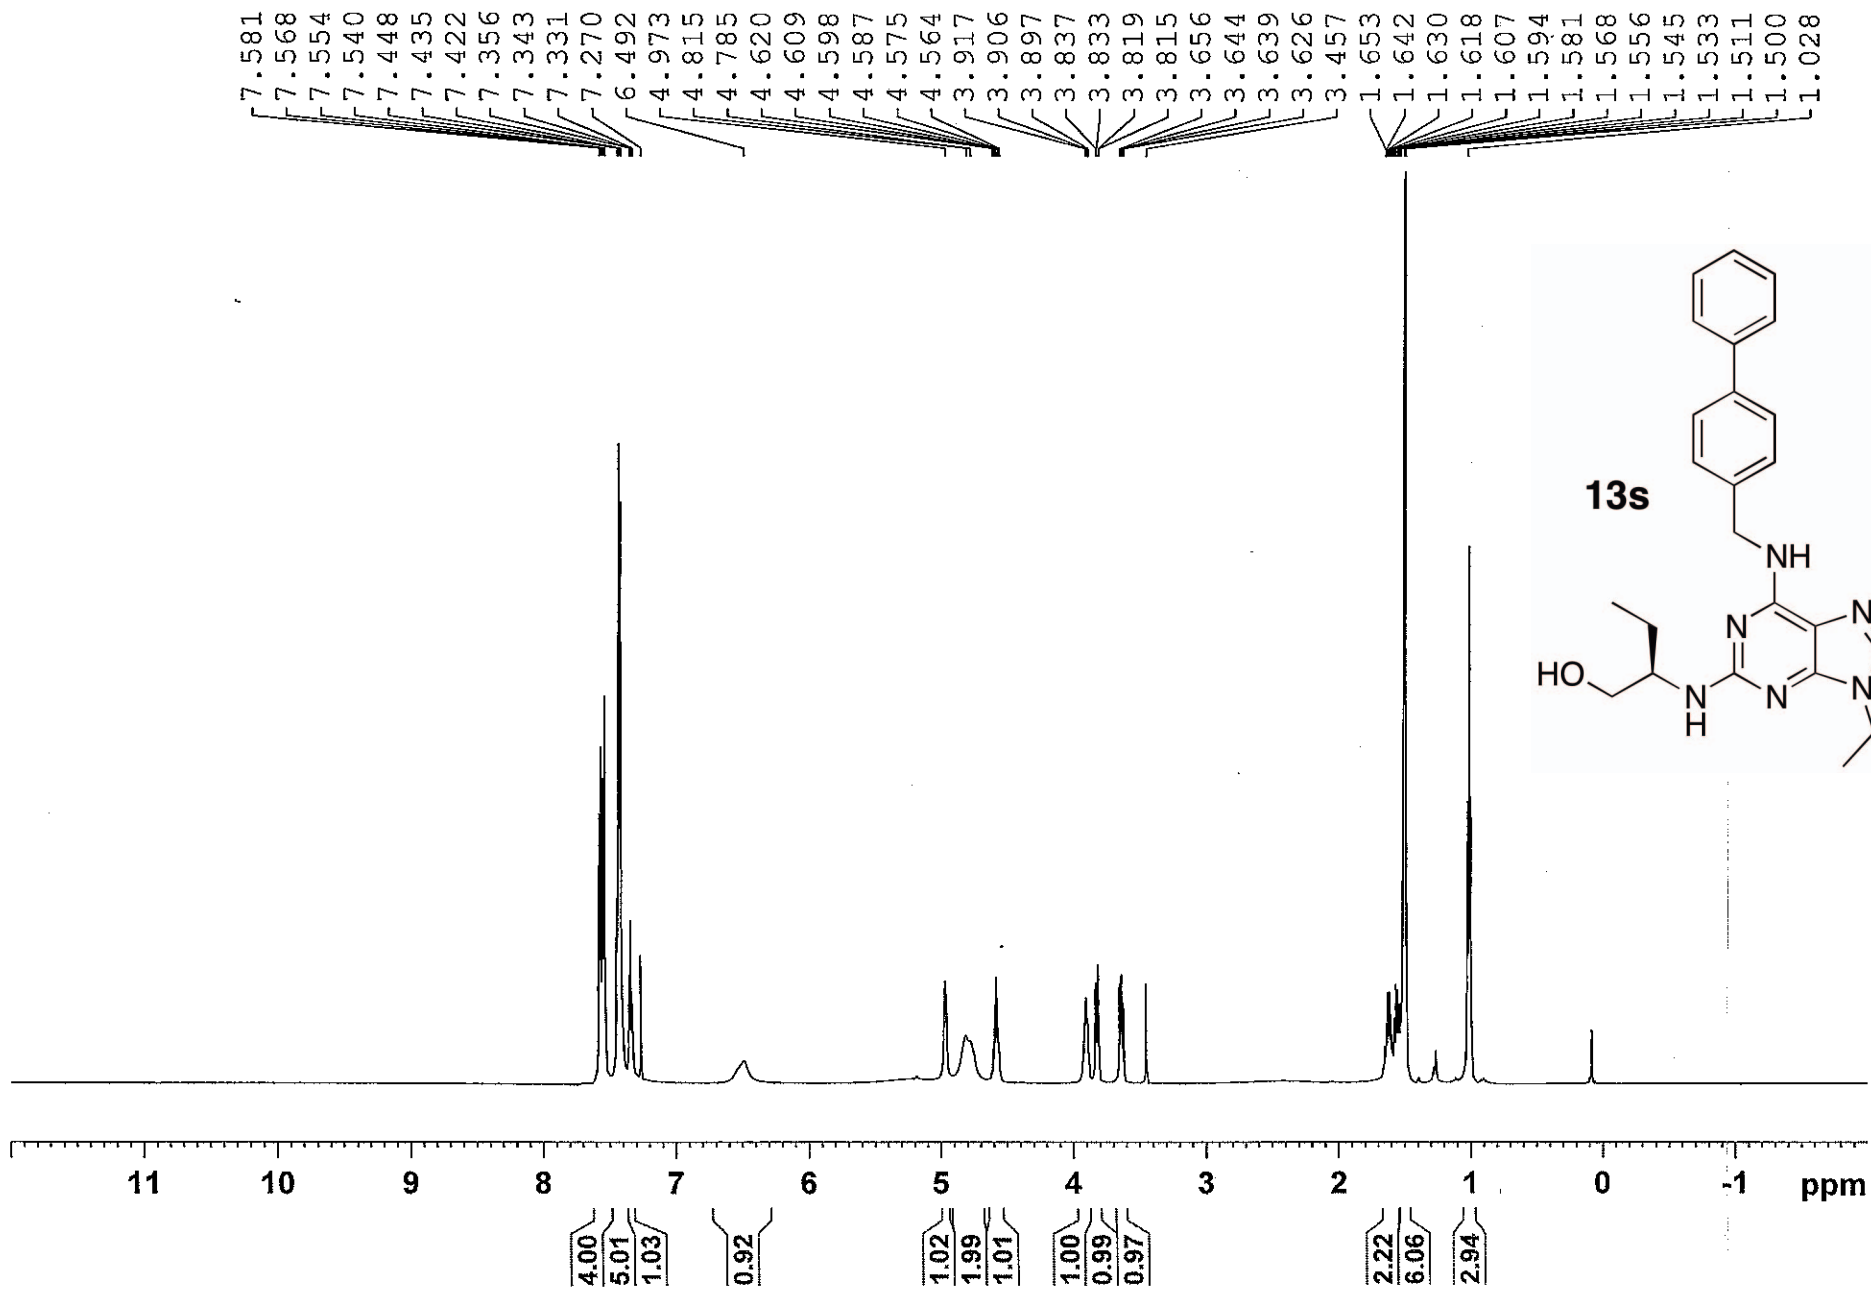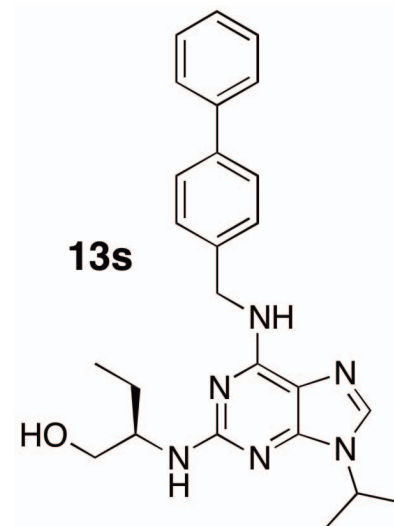

kb-NB-184-91

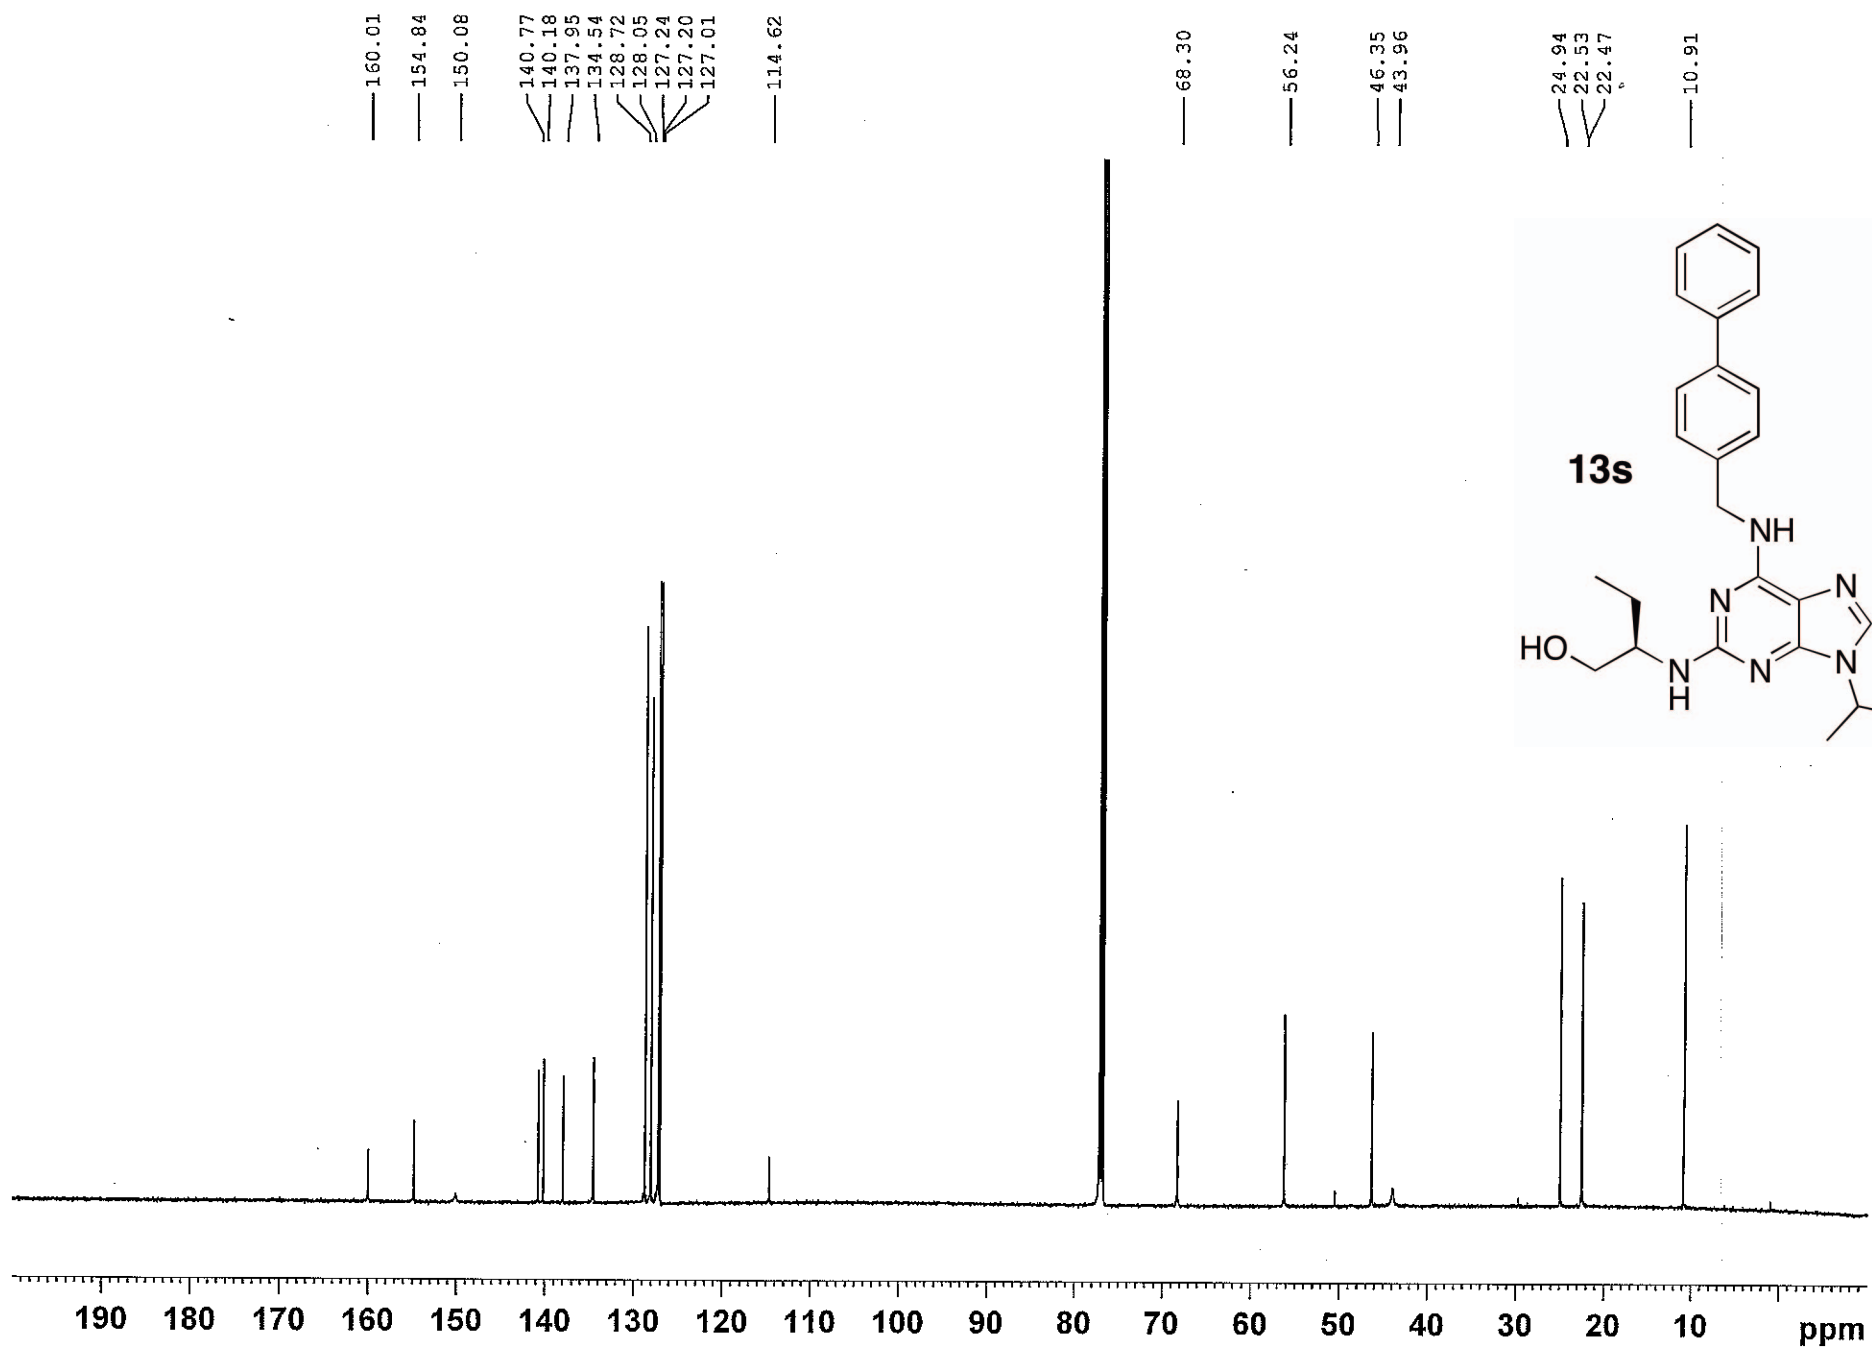



LSNB189-13-CDC13-301a-1H



Current Data Parameters  
NAME LSNB189-13-CDC13-301a-1H  
EXPNO 13  
PROCNO 1

F2 - Acquisition Parameters  
Date\_ 20090731  
Time 17.40  
INSTRUM spect  
PROBHD 5 mm DUL 1H-13  
PULPROG zg  
TD 32768  
SOLVENT CDC13  
NS 16  
DS 2  
SWH 6218.905 Hz  
FIDRES 0.189786 Hz  
AQ 2.6345973 sec  
RG 181  
DW 80.400 usec  
DE 6.00 usec  
TE 300.0 K  
D1 2.00000000 sec  
TD0 1

===== CHANNEL f1 =====  
NUC1 1H  
P1 9.00 usec  
PL1 1.00 dB  
SFO1 300.3818550 MHz

F2 - Processing parameters  
SI 16384  
SF 300.3800000 MHz  
WDW EM  
SSB 0  
LB 0.30 Hz  
GB 0  
PC 1.00

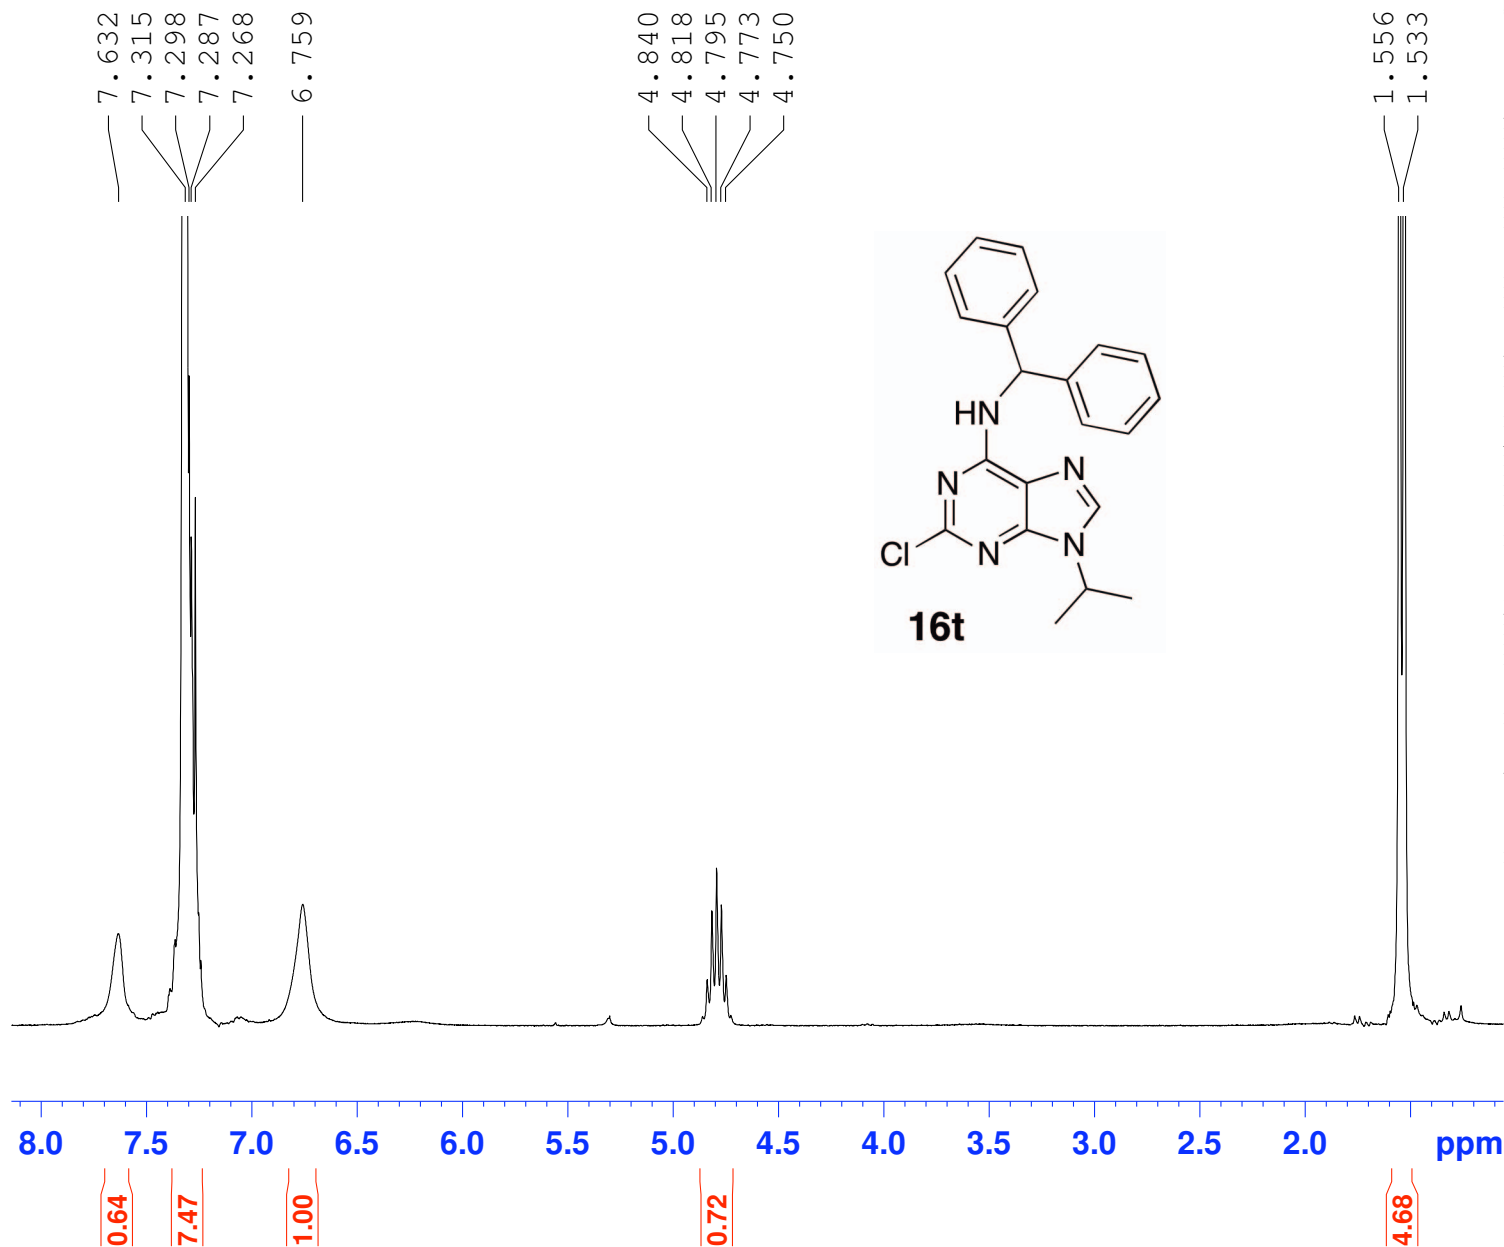

LSNB189-13-CDC13-301-13C



NAME LSNB189-13-CDC13-301-13C  
EXPNO 13  
PROCNO 1  
Date\_ 20090810  
Time 15.01  
INSTRUM spect  
PROBHD 5 mm QNP 1H/1  
PULPROG zgpg30  
TD 65536  
SOLVENT CDC13  
NS 870  
DS 4  
SWH 17985.611 Hz  
FIDRES 0.274439 Hz  
AQ 1.8219508 sec  
RG 16384  
DW 27.800 usec  
DE 6.50 usec  
TE 295.4 K  
D1 2.00000000 sec  
D11 0.03000000 sec  
TD0 1

===== CHANNEL f1 =====  
NUC1 13C  
P1 10.00 usec  
PL1 0.00 dB  
SFO1 75.4639789 MHz

===== CHANNEL f2 =====  
CPDPRG2 waltz16  
NUC2 1H  
PCPD2 100.00 usec  
PL2 0.00 dB  
PL12 25.66 dB  
PL13 120.00 dB  
SFO2 300.0862003 MHz  
SI 32768  
SF 75.4564172 MHz  
WDW EM  
SSB 0  
LB 1.00 Hz  
GB 0  
PC 1.40

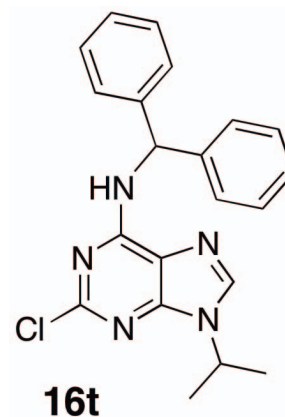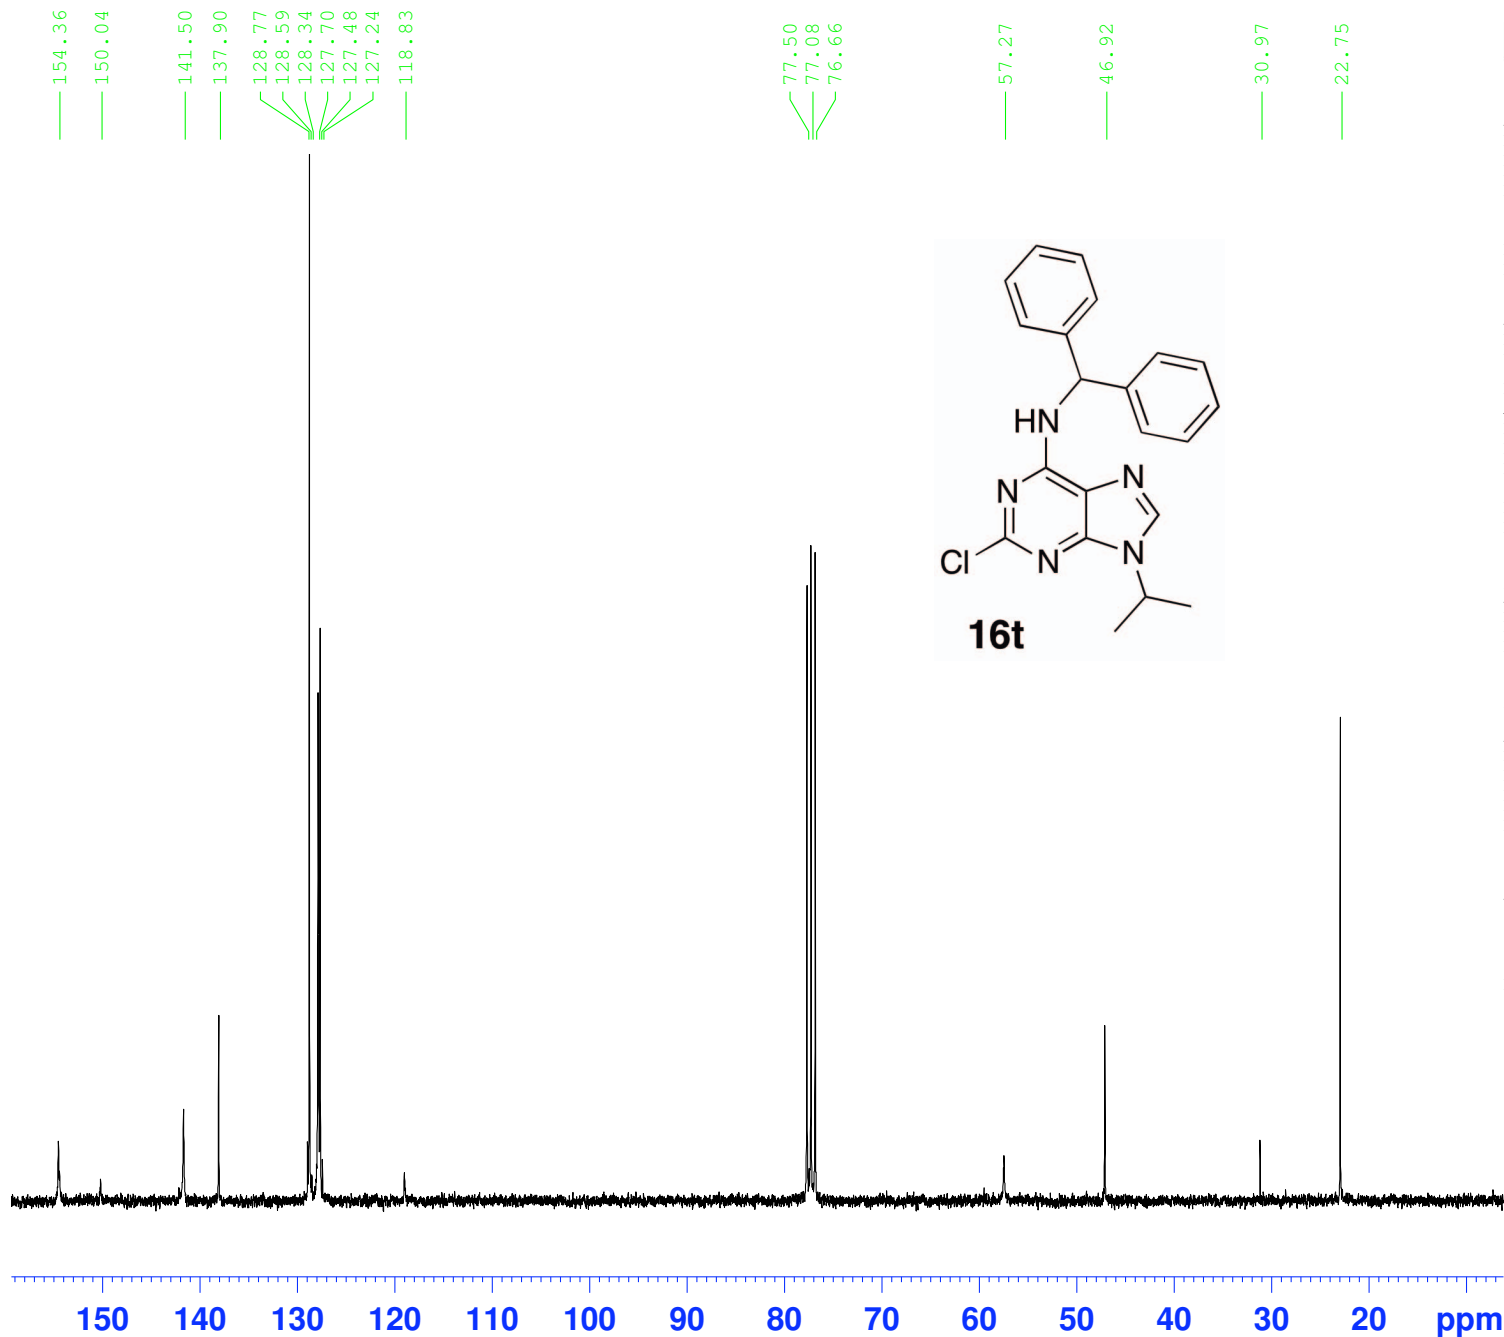

LSNB189-14-CDC13-301-1H



NAME LSNB189-14-CDC13-301-13C  
EXPNO 14  
PROCNO 1  
Date\_ 20090811  
Time 15.55  
INSTRUM spect  
PROBHD 5 mm QNP 1H/1  
PULPROG zg30  
TD 65536  
SOLVENT CDC13  
NS 450  
DS 2  
SWH 6172.839 Hz  
FIDRES 0.094190 Hz  
AQ 5.3084660 sec  
RG 256  
DW 81.000 usec  
DE 6.50 usec  
TE 300.3 K  
D1 1.00000000 sec  
TD0 1

===== CHANNEL f1 =====  
NUC1 1H  
P1 5.21 usec  
PL1 0.00 dB  
SFO1 300.0868531 MHz  
SI 32768  
SF 300.0850050 MHz  
WDW EM  
SSB 0  
LB 0.30 Hz  
GB 0  
PC 1.00

7.476  
7.337  
7.317  
7.290  
7.276  
7.253  
6.532  
6.409  
4.823  
4.803  
4.636  
4.614  
4.591  
4.569  
4.547  
3.776  
3.738  
3.704  
3.566  
3.541  
3.533  
3.507  
1.626  
1.604  
1.581  
1.532  
1.510  
1.464  
1.447  
1.384  
1.273  
0.985  
0.960  
0.936  
0.089

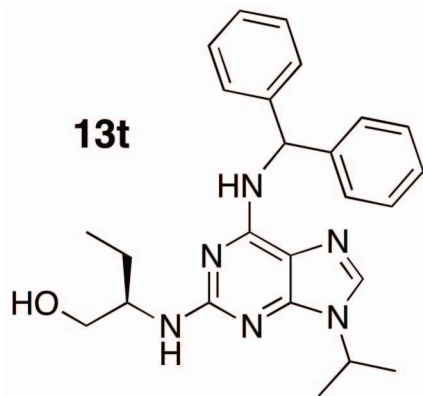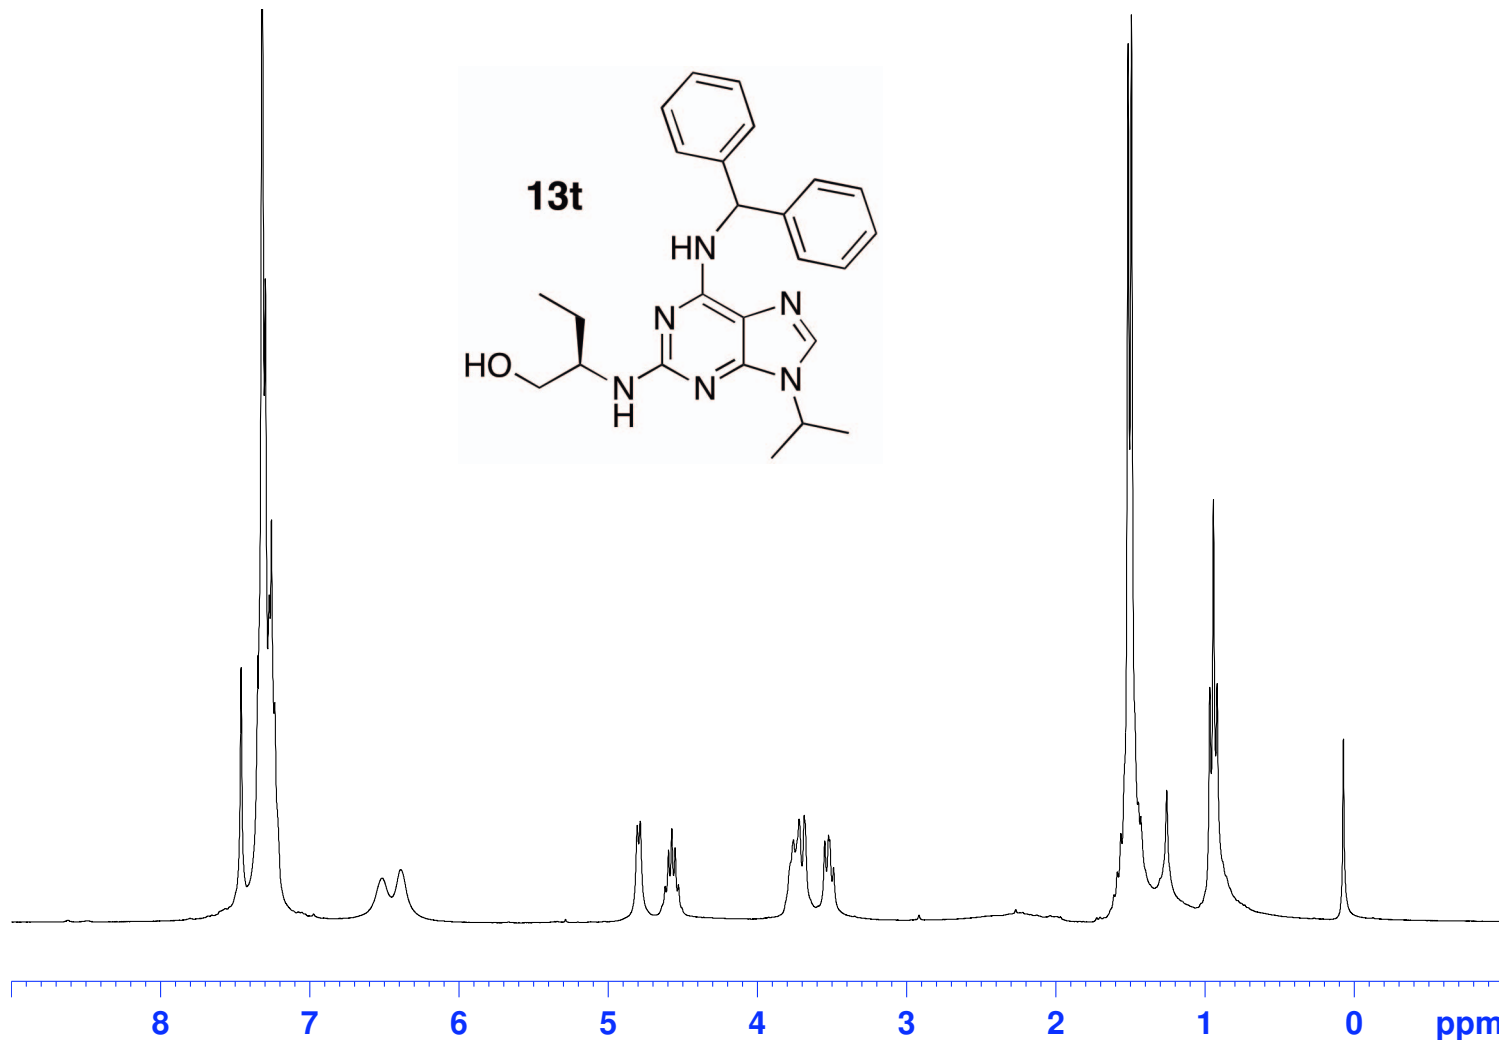

6.01  
0.83  
0.39  
0.53  
0.98  
0.52  
4.06  
0.63  
1.79  
0.34

LSNB189-14-CDC13-301-13C



NAME LSNB189-14-CDC13-301-13C  
EXPNO 14  
PROCNO 1  
Date\_ 20090812  
Time 13.59  
INSTRUM spect  
PROBHD 5 mm QNP 1H/1  
PULPROG zgpg30  
TD 65536  
SOLVENT CDC13  
NS 780  
DS 4  
SWH 17985.611 Hz  
FIDRES 0.274439 Hz  
AQ 1.8219508 sec  
RG 14596.5  
DW 27.800 usec  
DE 6.50 usec  
TE 294.8 K  
D1 2.00000000 sec  
D11 0.03000000 sec  
TD0 1

===== CHANNEL f1 =====  
NUC1 13C  
P1 10.00 usec  
PL1 0.00 dB  
SFO1 75.4639789 MHz

===== CHANNEL f2 =====  
CPDPRG2 waltz16  
NUC2 1H  
PCPD2 100.00 usec  
PL2 0.00 dB  
PL12 25.66 dB  
PL13 120.00 dB  
SFO2 300.0862003 MHz  
SI 32768  
SF 75.4564330 MHz  
WDW EM  
SSB 0  
LB 1.00 Hz  
GB 0  
PC 1.40

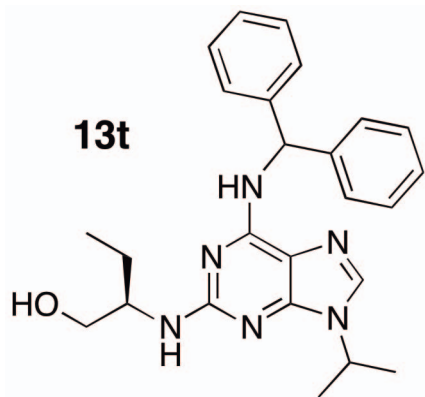

159.94  
153.93  
142.21  
134.57  
128.55  
128.52  
127.62  
127.30  
127.25  
114.58  
77.47  
77.25  
77.05  
76.63  
67.90  
57.93  
56.06  
46.39  
29.72  
24.88  
22.61  
22.53  
10.90  
1.04

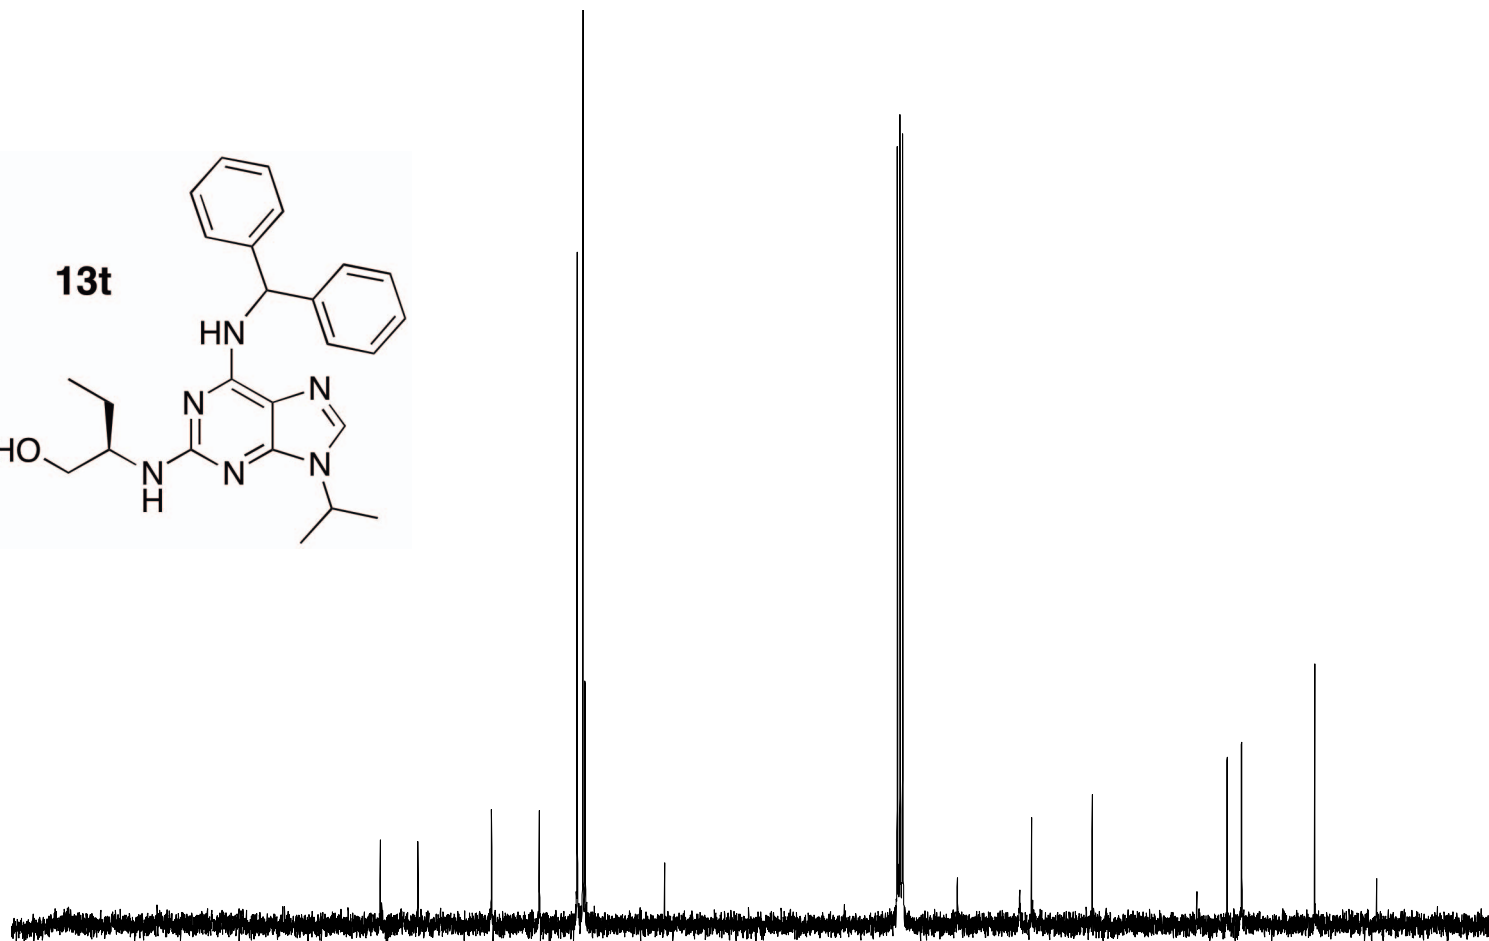

200 180 160 140 120 100 80 60 40 20 0 ppm

1.58  
1.48  
3.19  
2.22  
12.71  
17.50  
0.67  
41.72  
1.69  
1.72  
2.26  
2.12  
0.92  
2.26  
4.76  
2.69  
0.51

ml.282.10 in CDCl<sub>3</sub>, 1H, 301a, 7/5/10

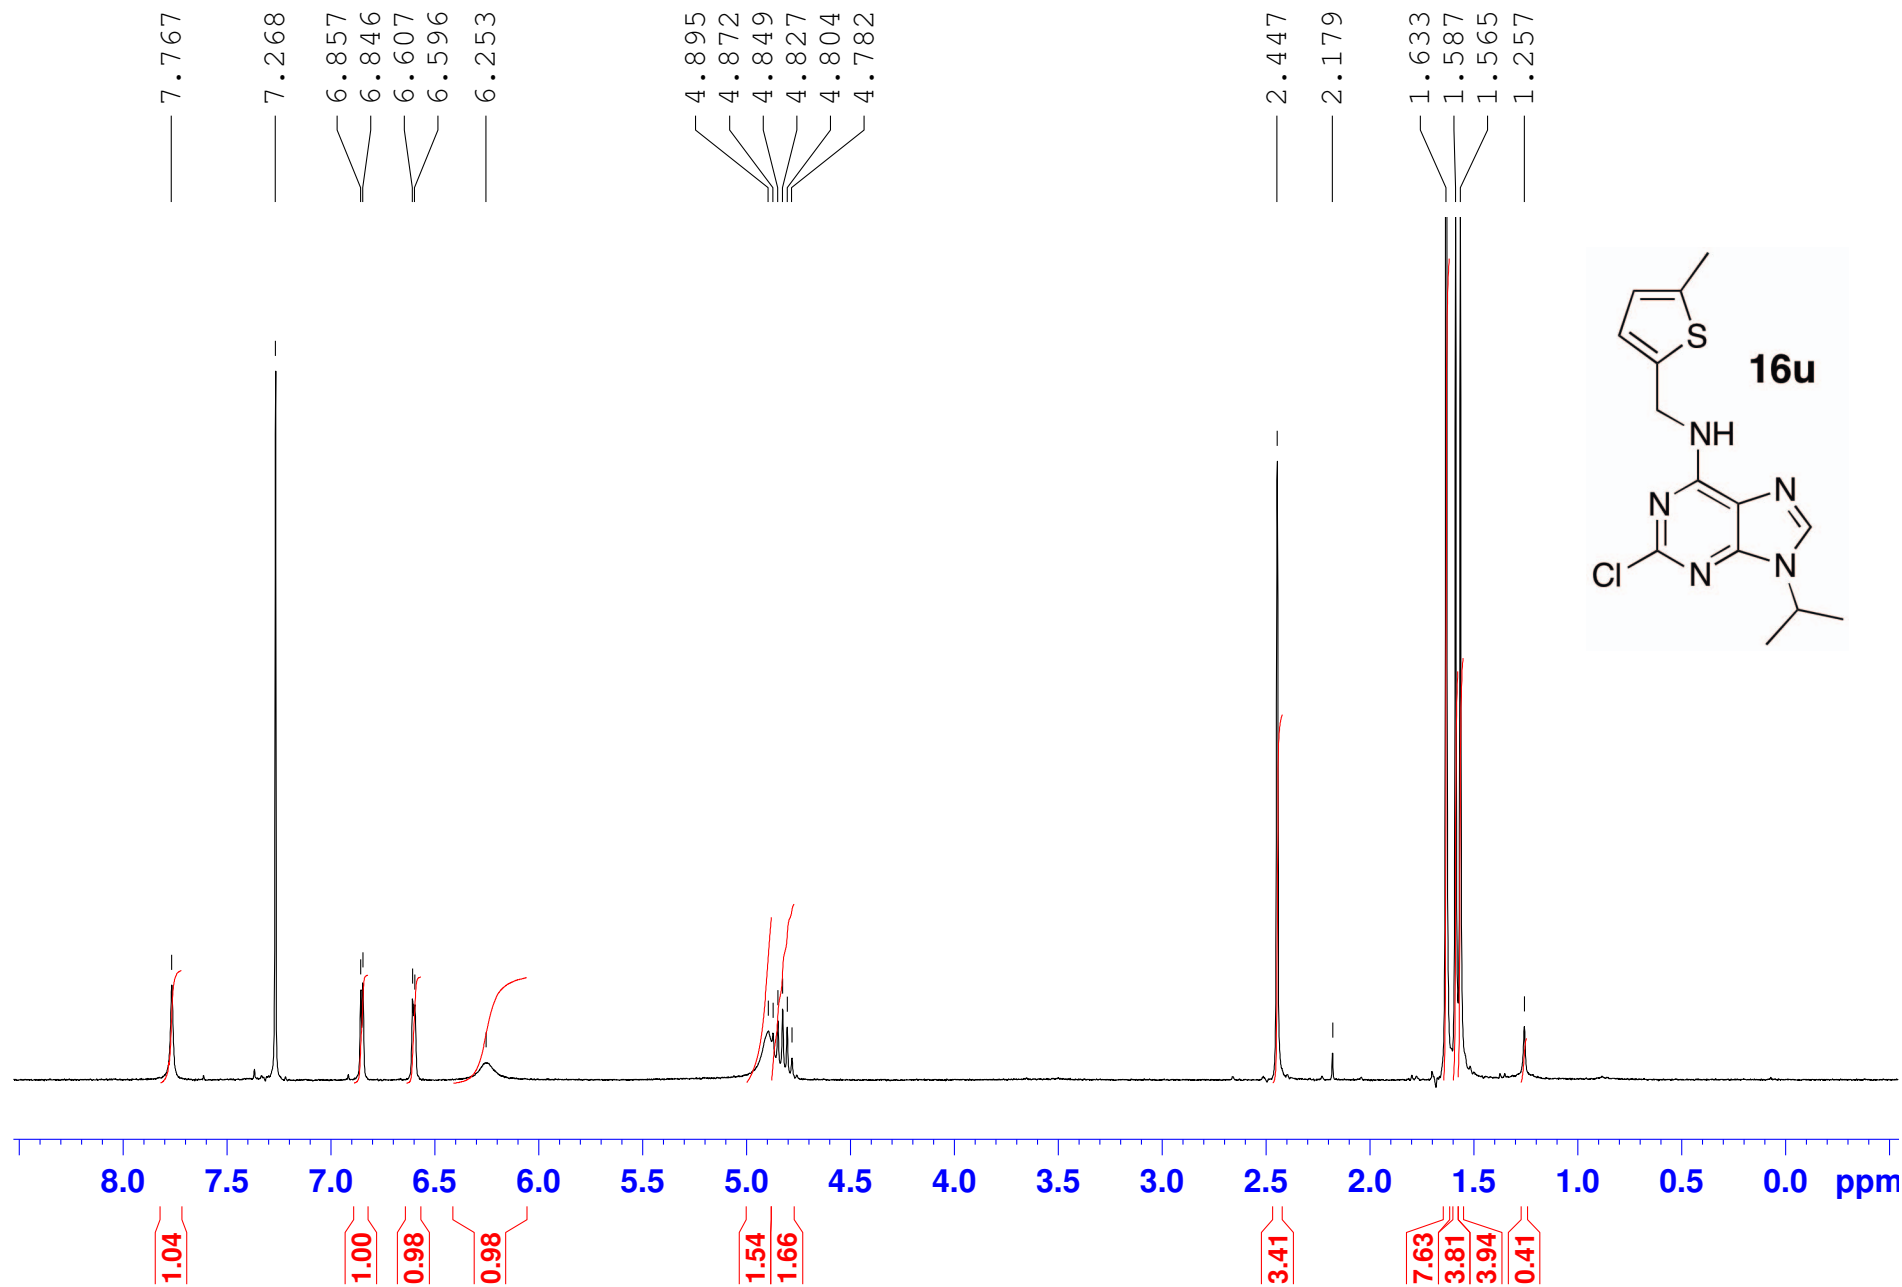

154.75  
154.16  
149.93  
139.86  
138.53  
137.82  
126.04  
124.73  
118.79

77.54  
77.11  
76.69

46.85  
39.55

22.77  
15.38  
14.22

NB225-11 Product 13C 21-Feb-10 17.53

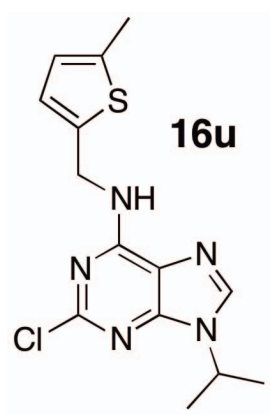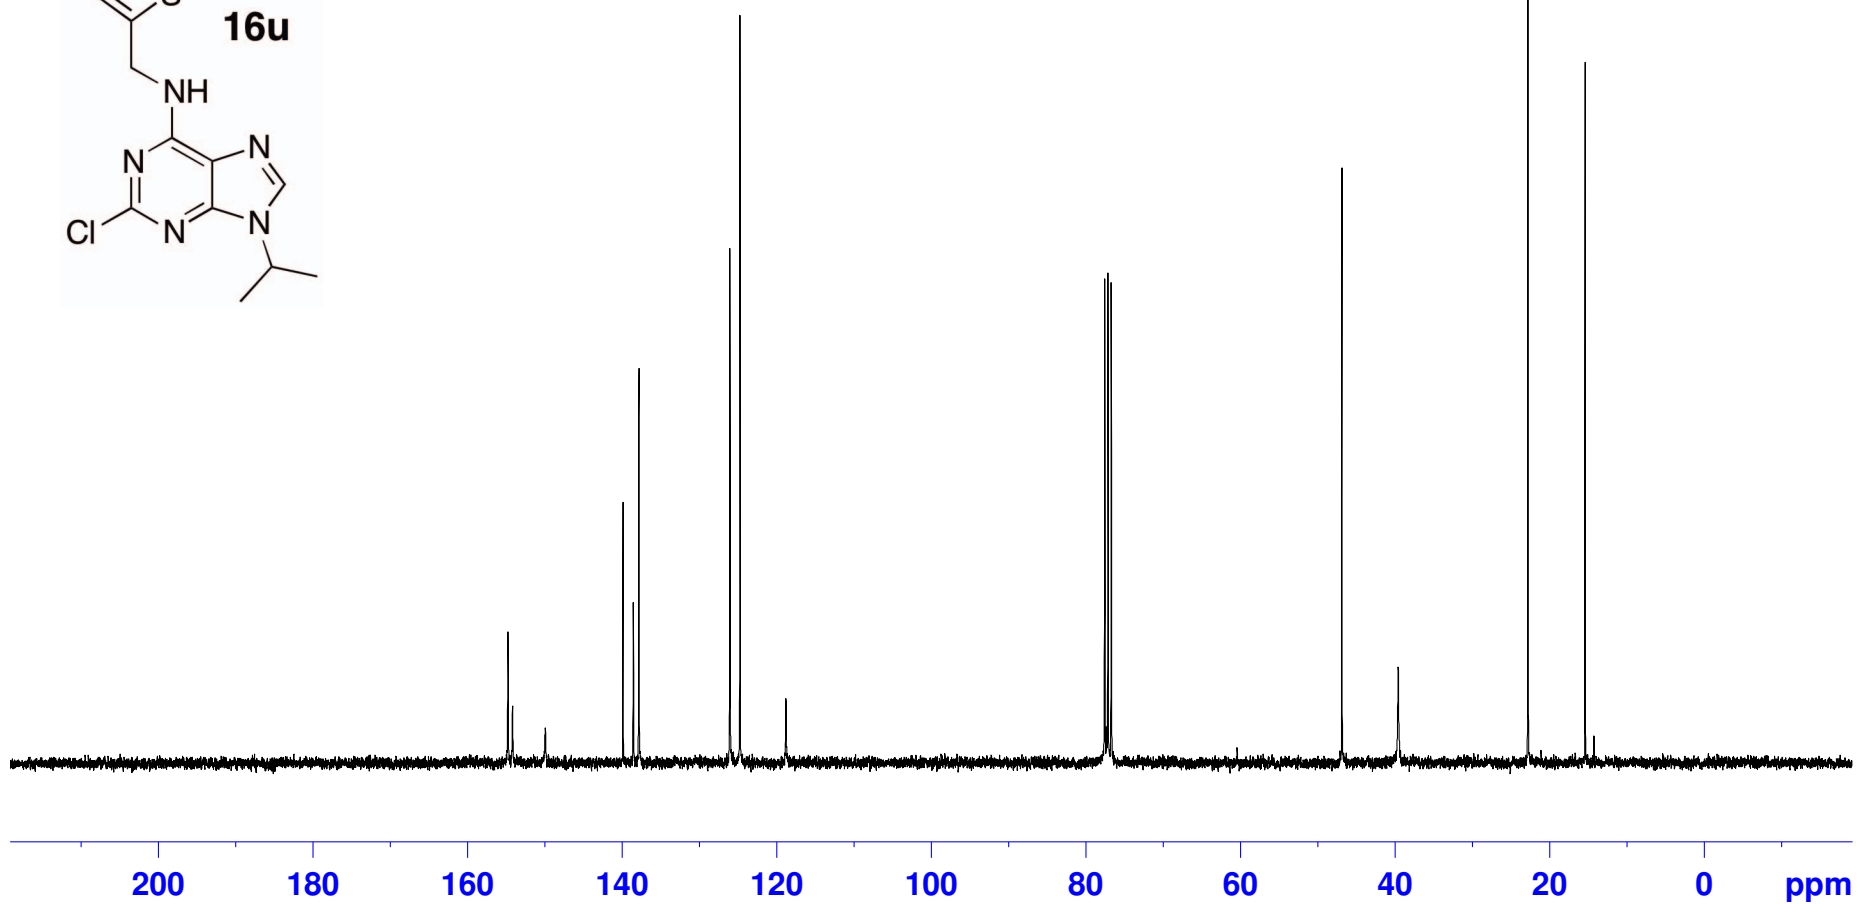

ml282-50\_Product in CDCl3, 1H, 400b, 1/7/11

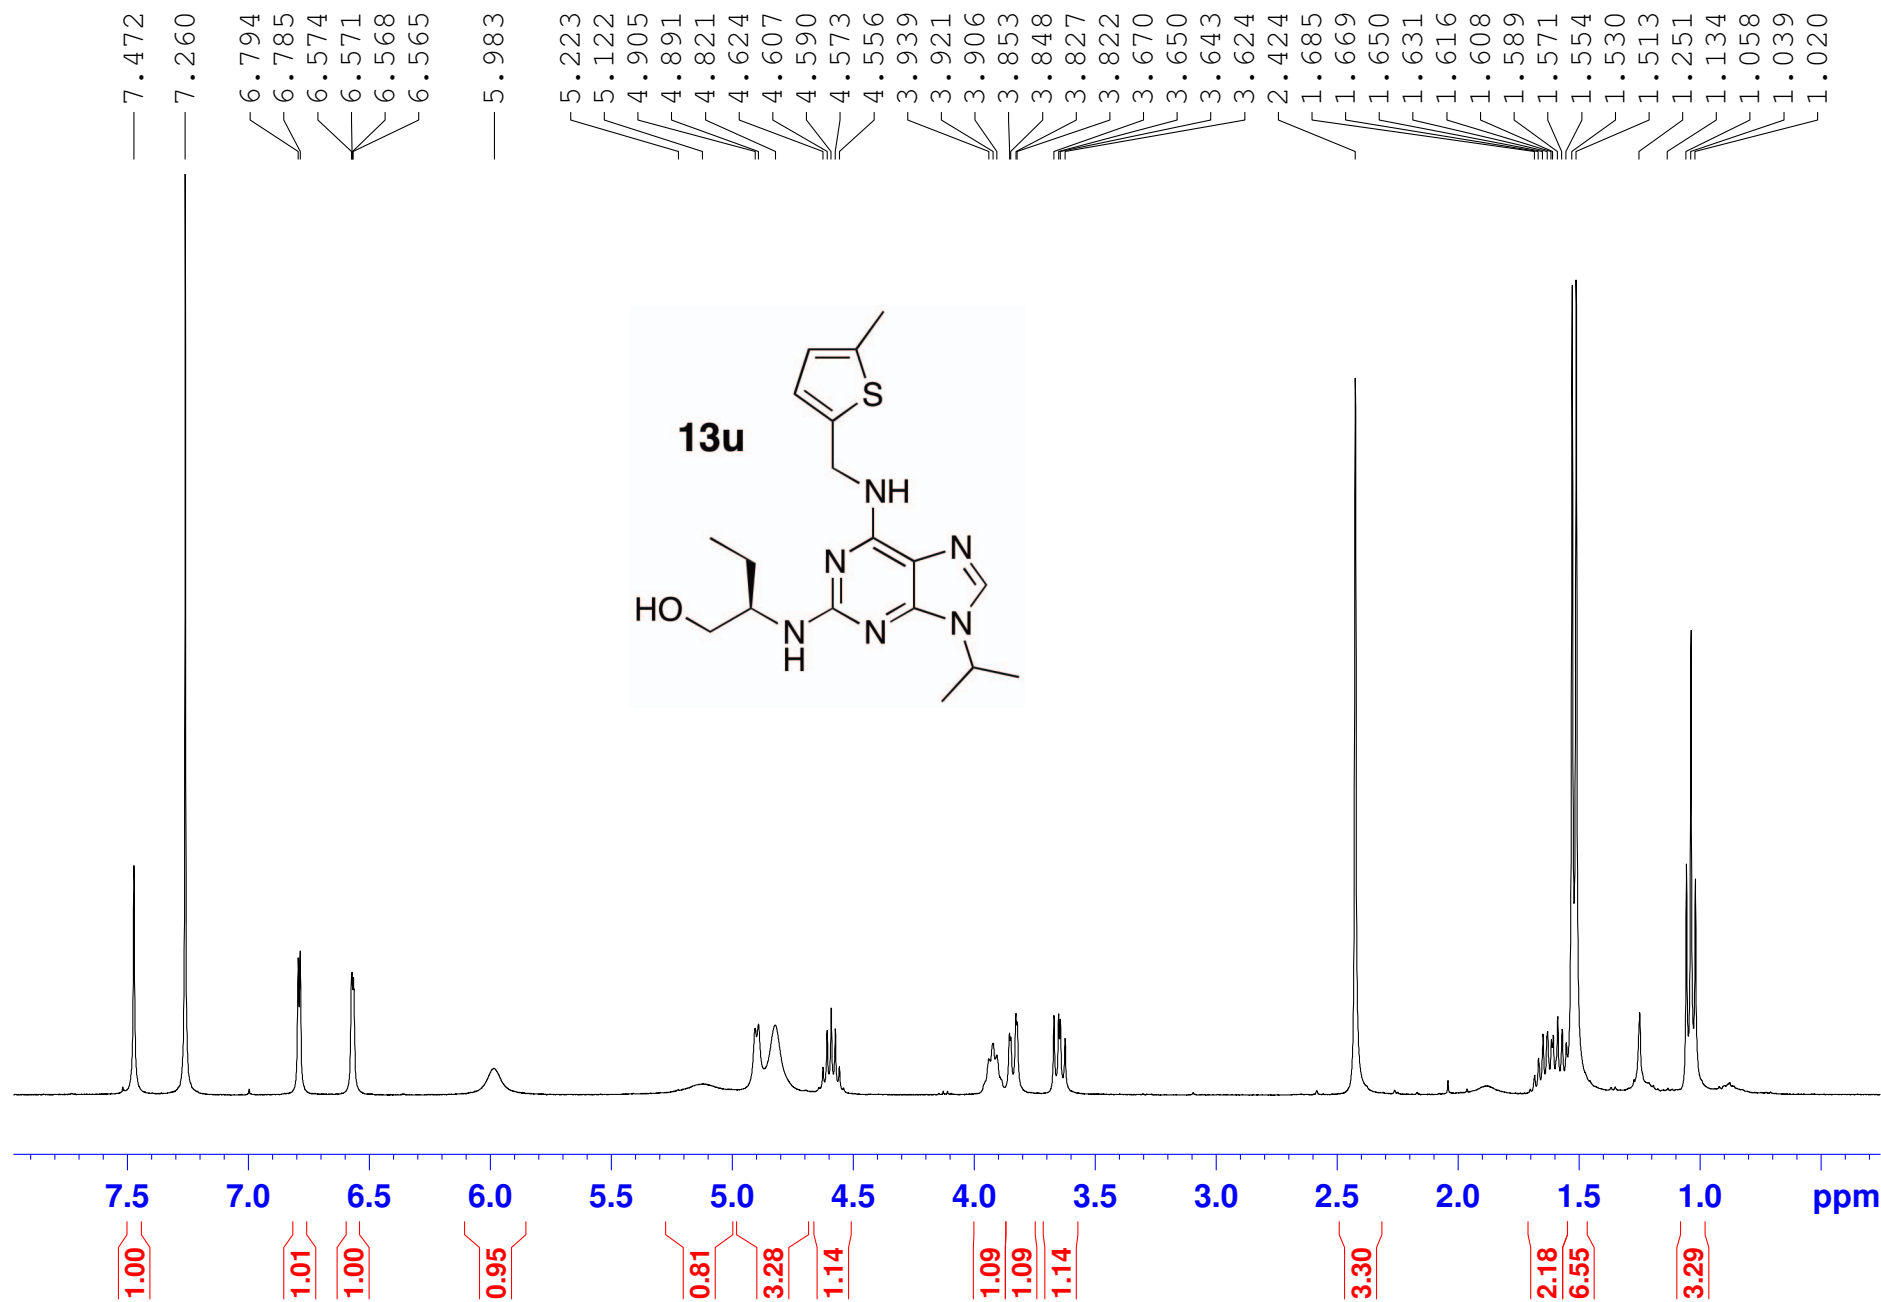

ml.282.11\_f14 in CDCl3, 13C, 400a, 7/13/10

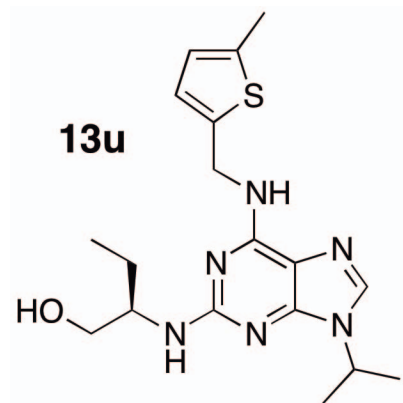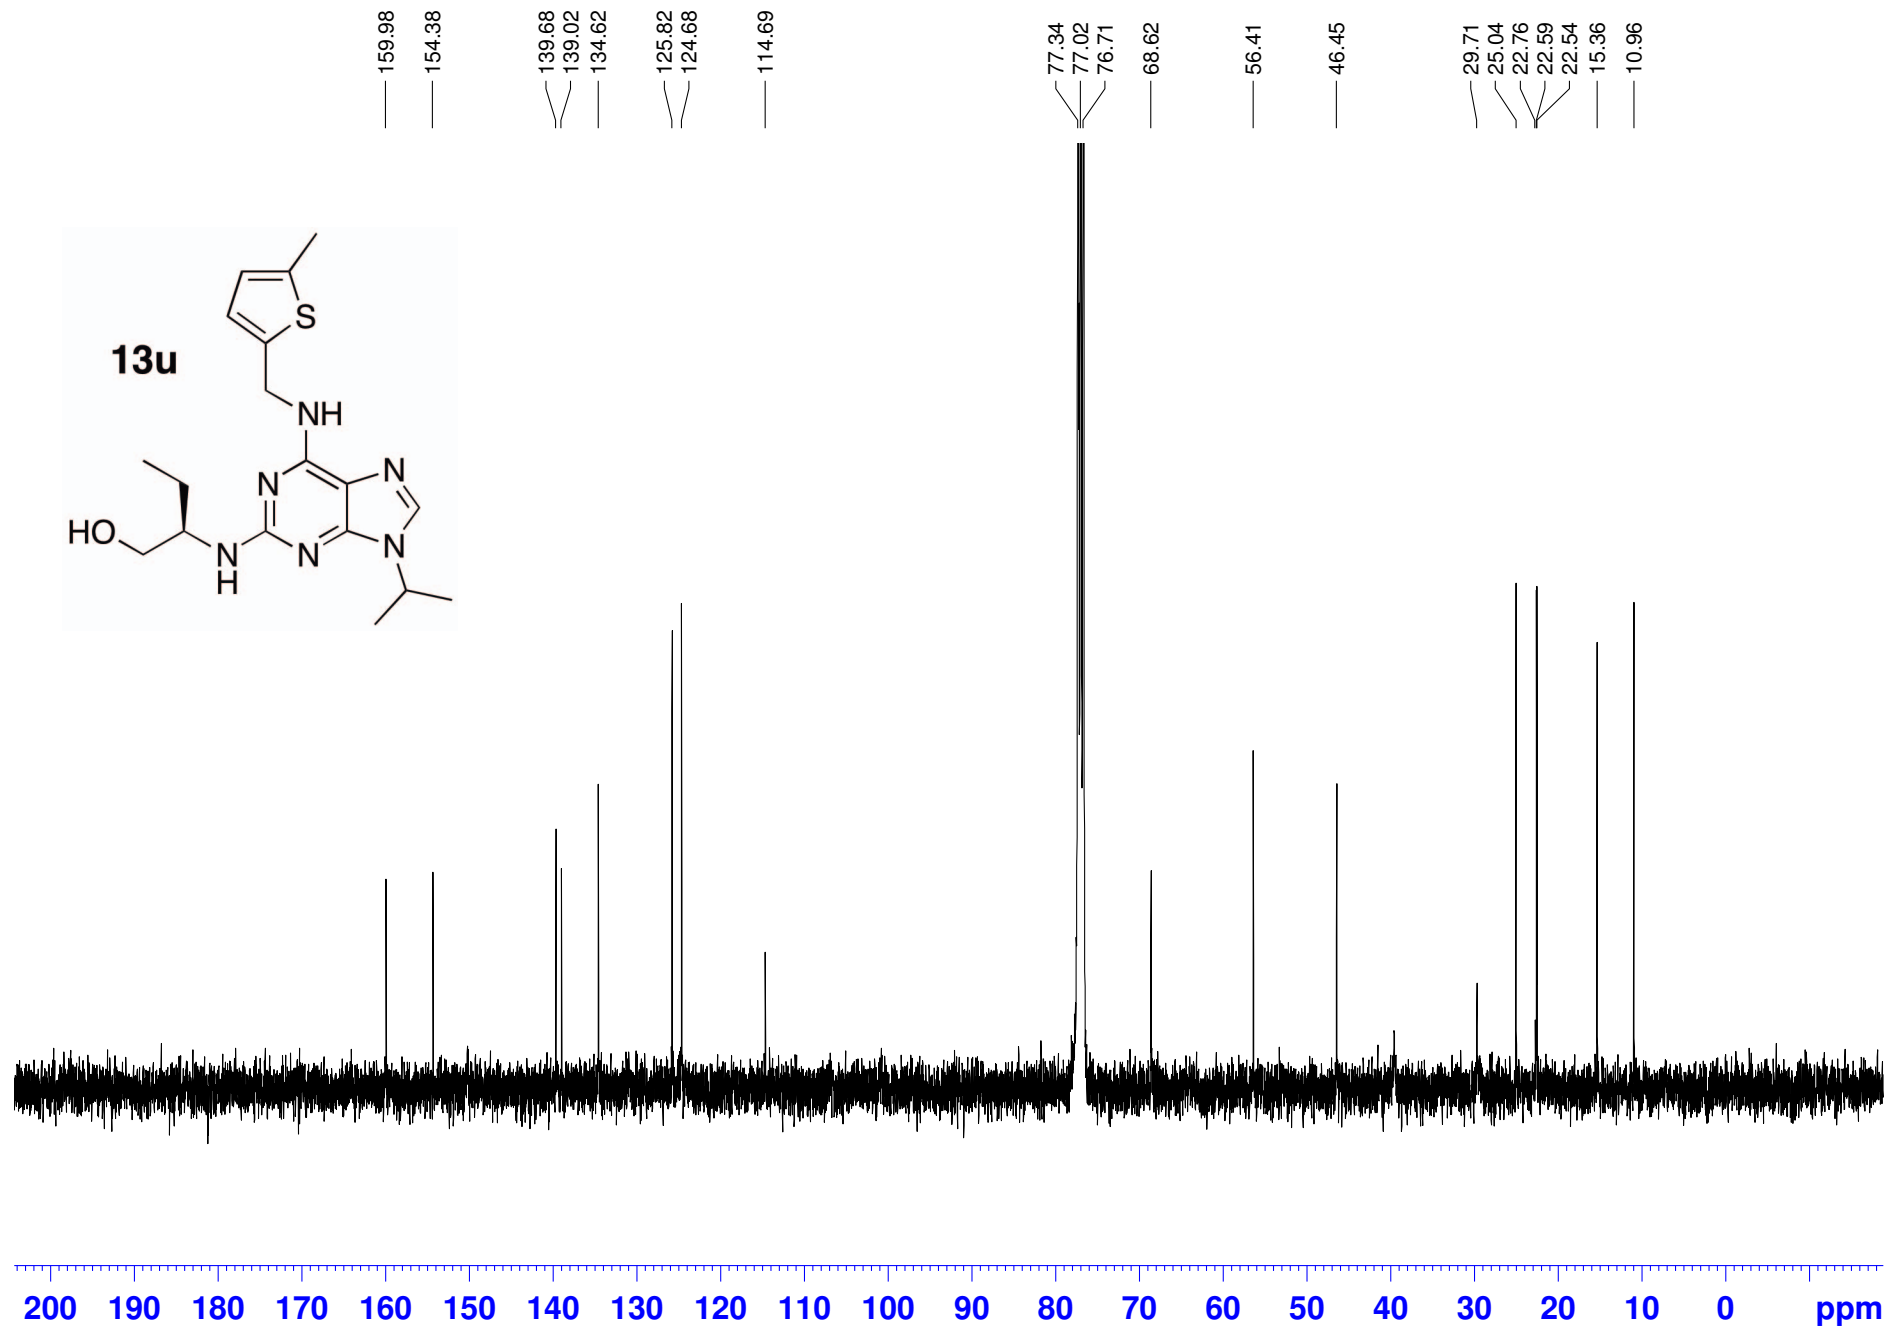



7.598  
7.573  
7.547  
7.491  
7.466  
7.440  
7.266

6.337

4.900  
4.876  
4.853  
4.830  
4.808  
4.785

2.051  
1.749  
1.589  
1.566  
1.263

NB225-09 Product 1H 17-Jan-10 13:19

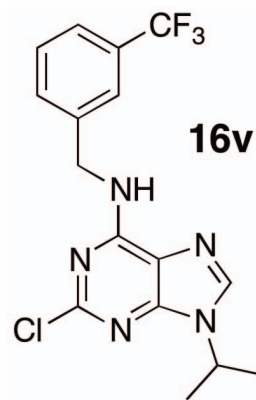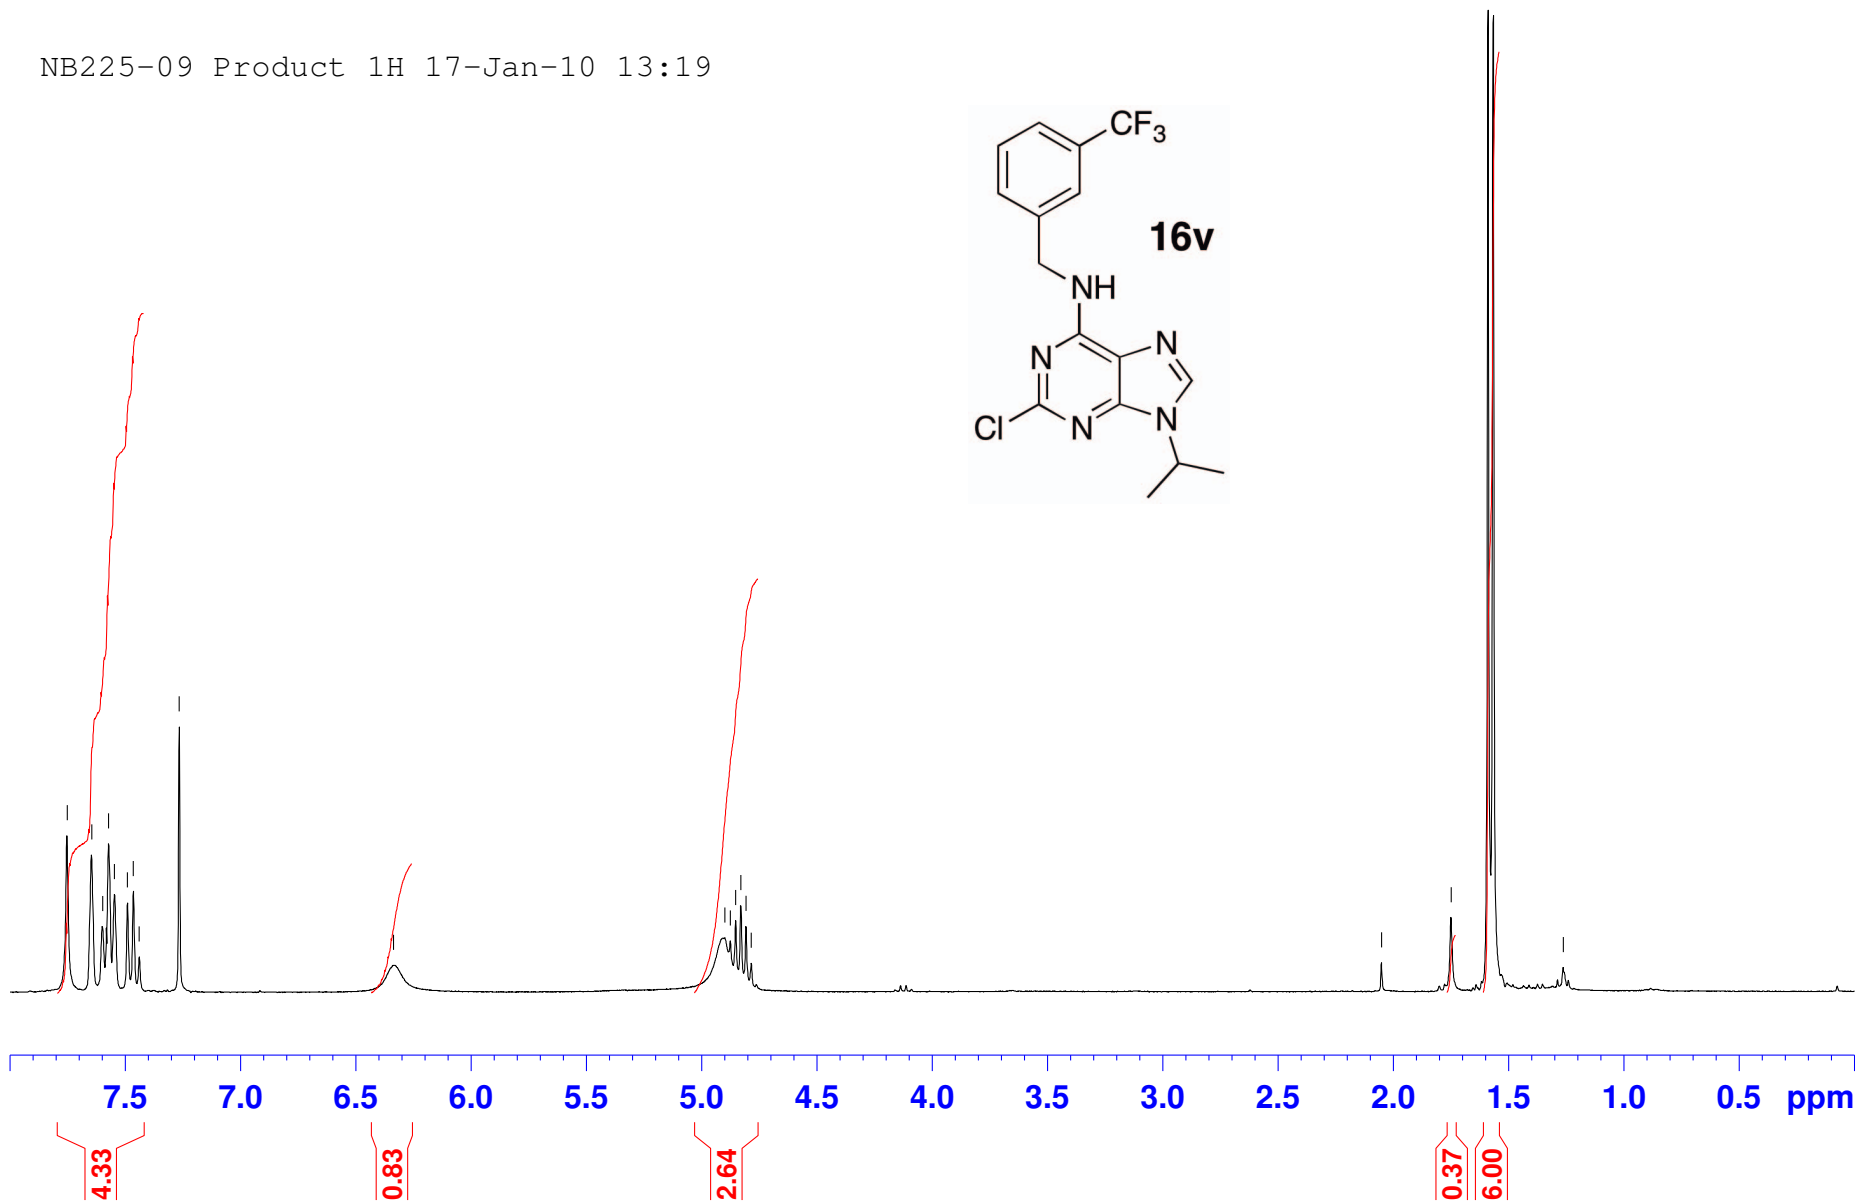

NB225-09 13C 23-Jan-10 14.50

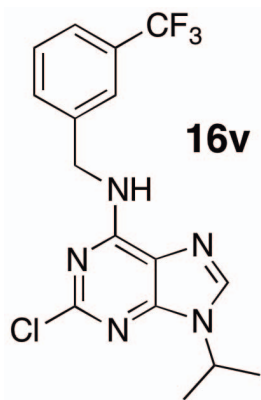

155.13  
154.24  
150.02  
139.43  
137.79  
131.59  
131.16  
130.73  
130.31  
129.38  
129.16  
125.77  
124.44  
124.39  
124.34  
124.29  
122.16  
118.77  
118.56

77.49  
77.07  
76.64

67.97

46.99  
43.94

25.60  
22.71

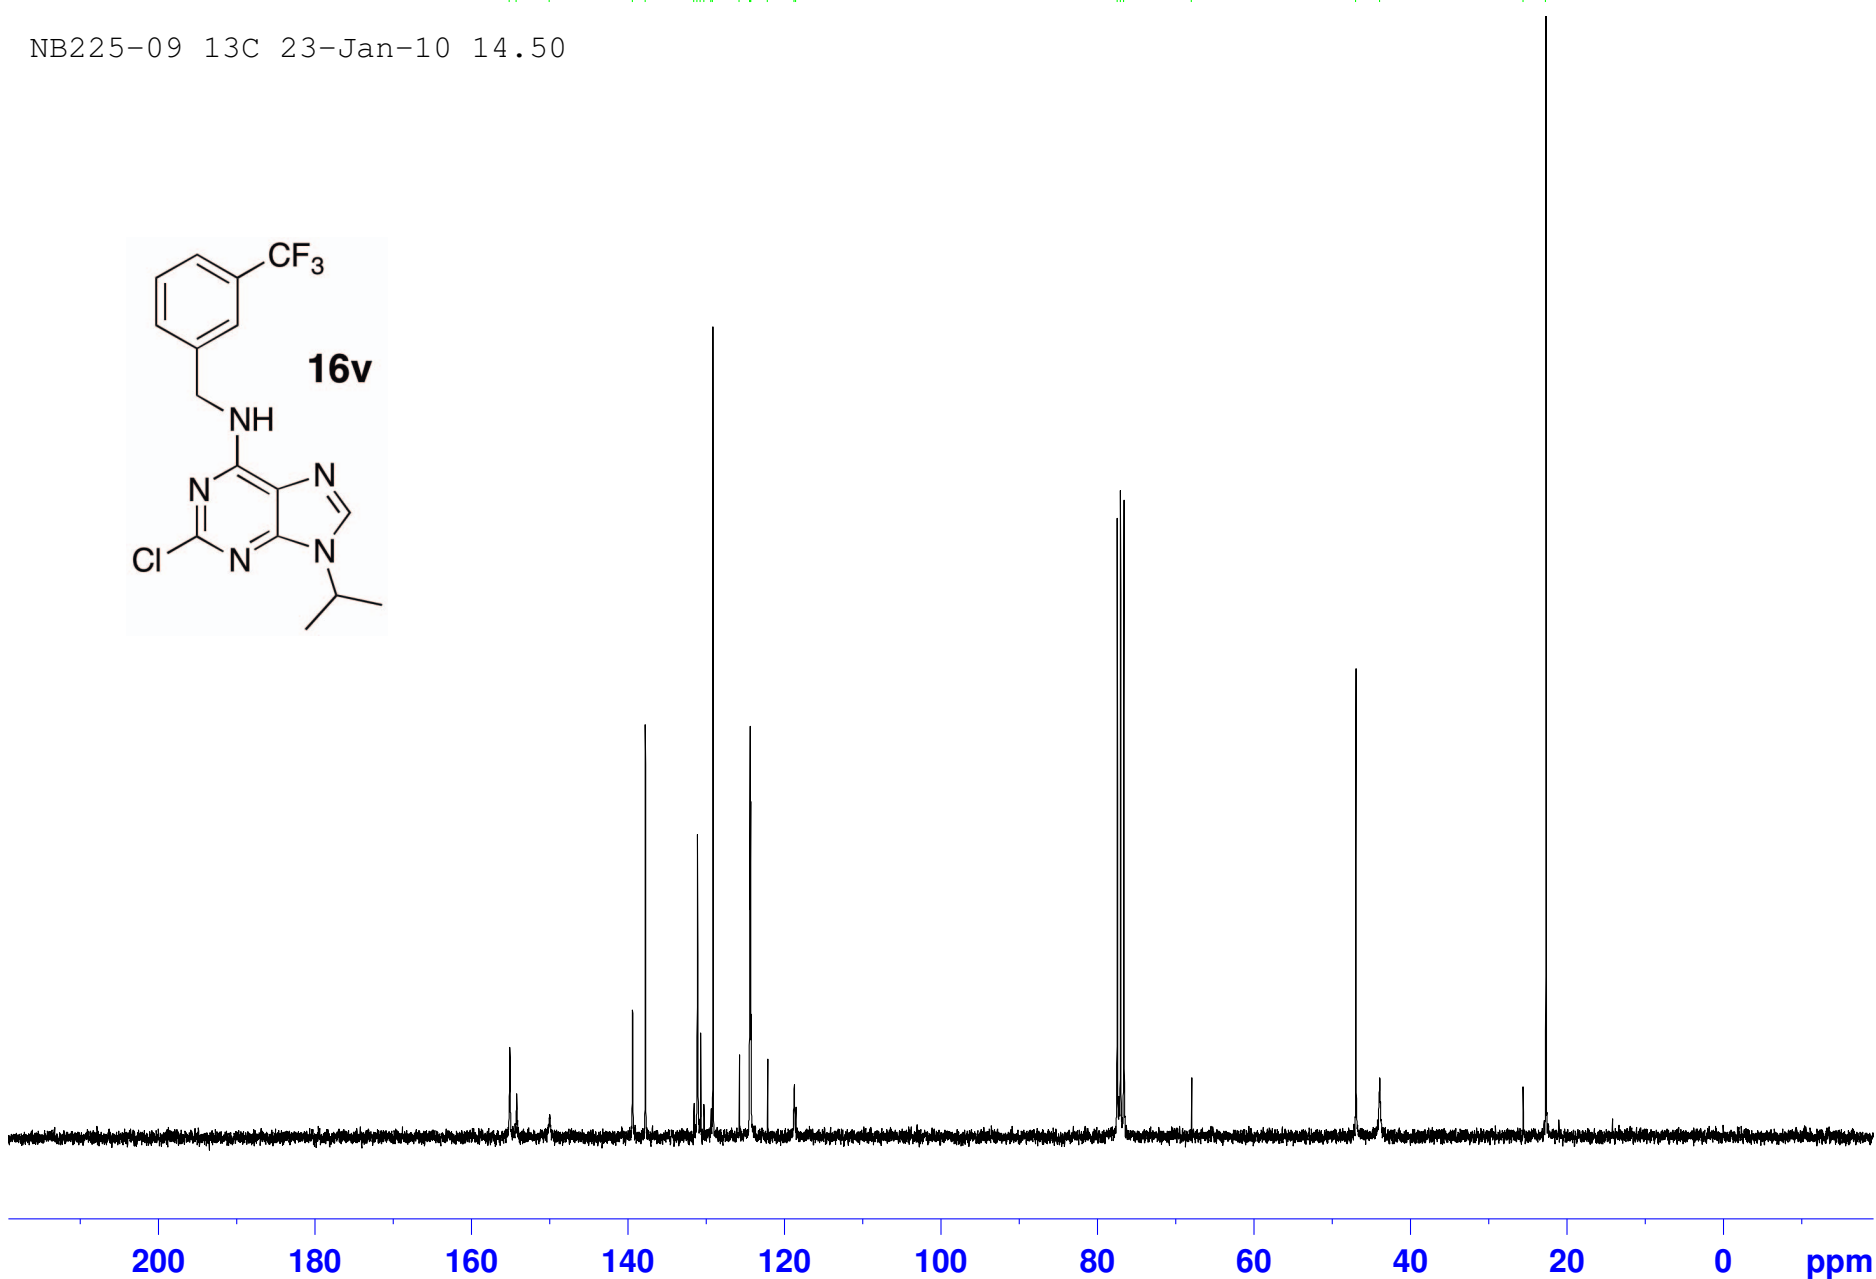

7.577  
7.551  
7.512  
7.468  
7.443  
7.418  
7.274

6.220

4.902  
4.883  
4.827  
4.660  
4.638  
4.615  
4.593  
4.570  
4.144  
4.120  
3.843  
3.808  
3.799  
3.659  
3.634  
3.624  
3.598

2.079  
2.057  
1.636  
1.615  
1.610  
1.555  
1.532  
1.270  
1.264  
1.036  
1.011  
0.986

0.081

NB225-15 Product 1H 06-Feb-10 16.43

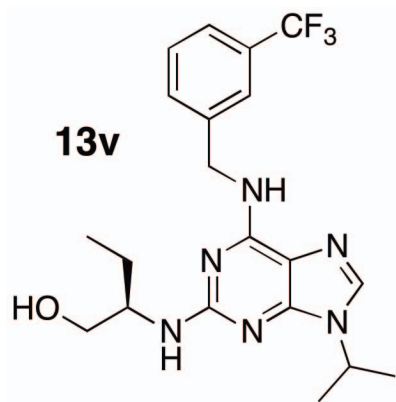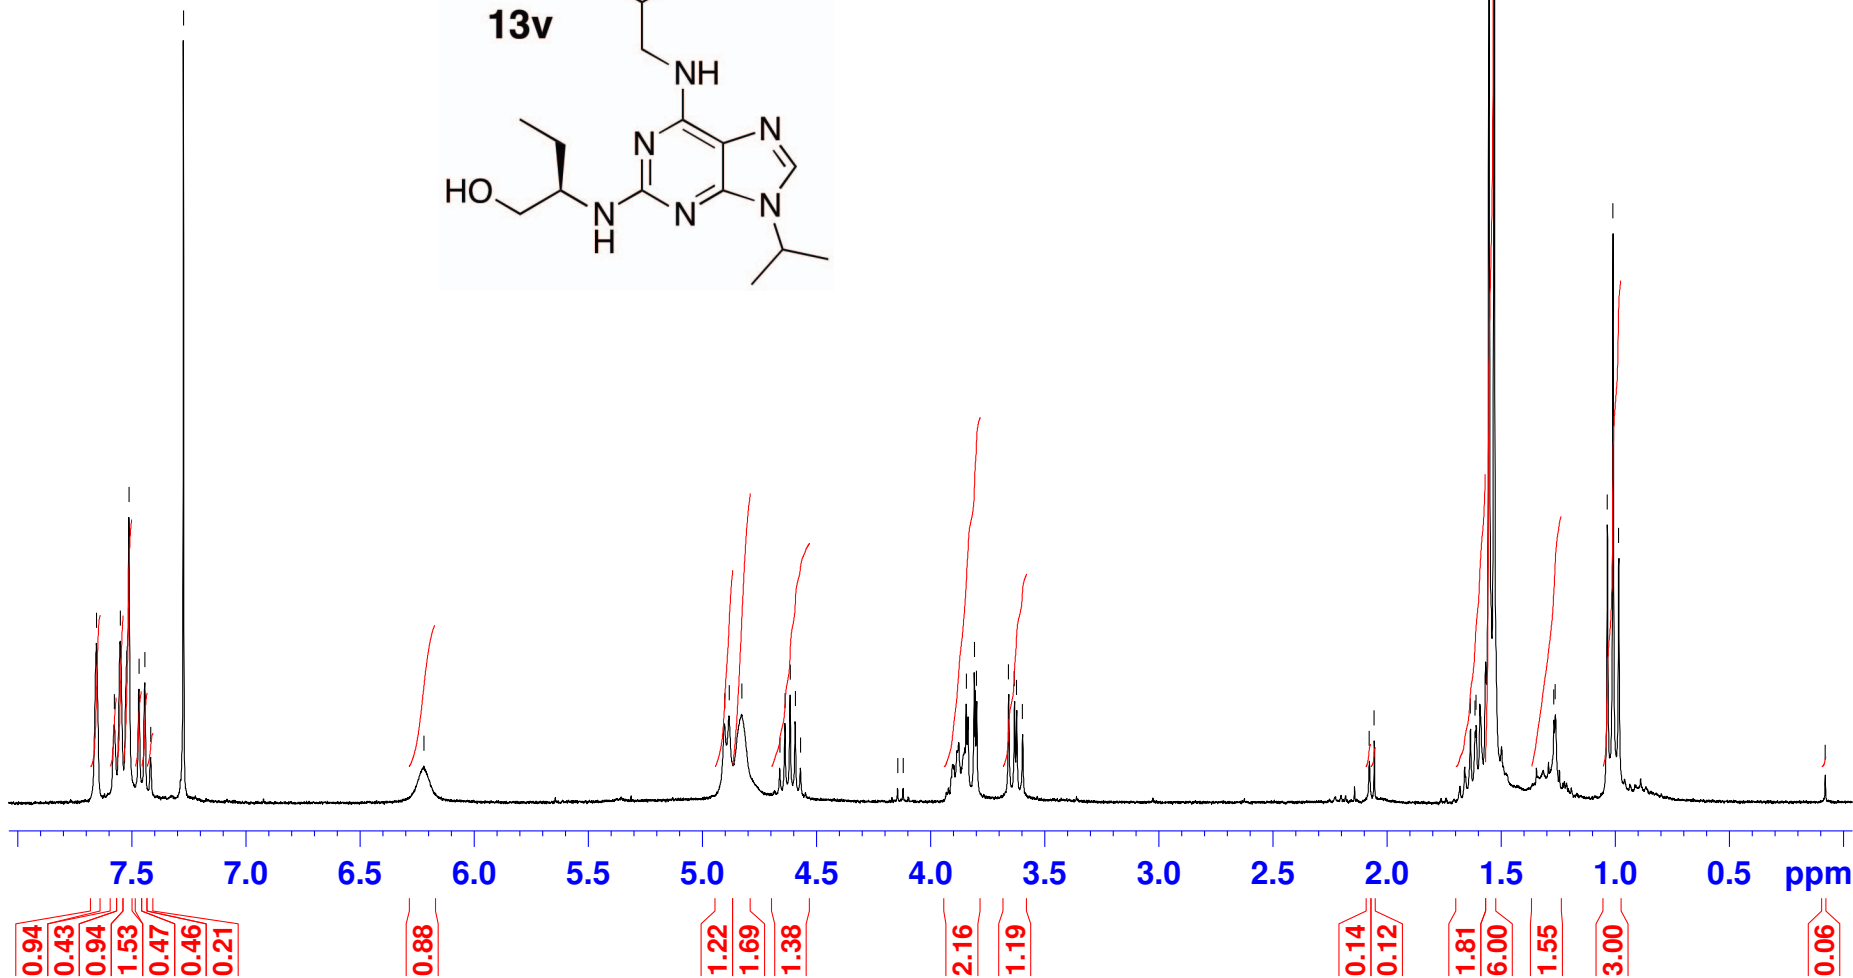

mf-00417-030\_CSC700\_13C

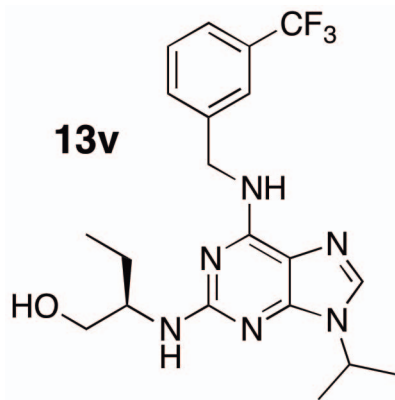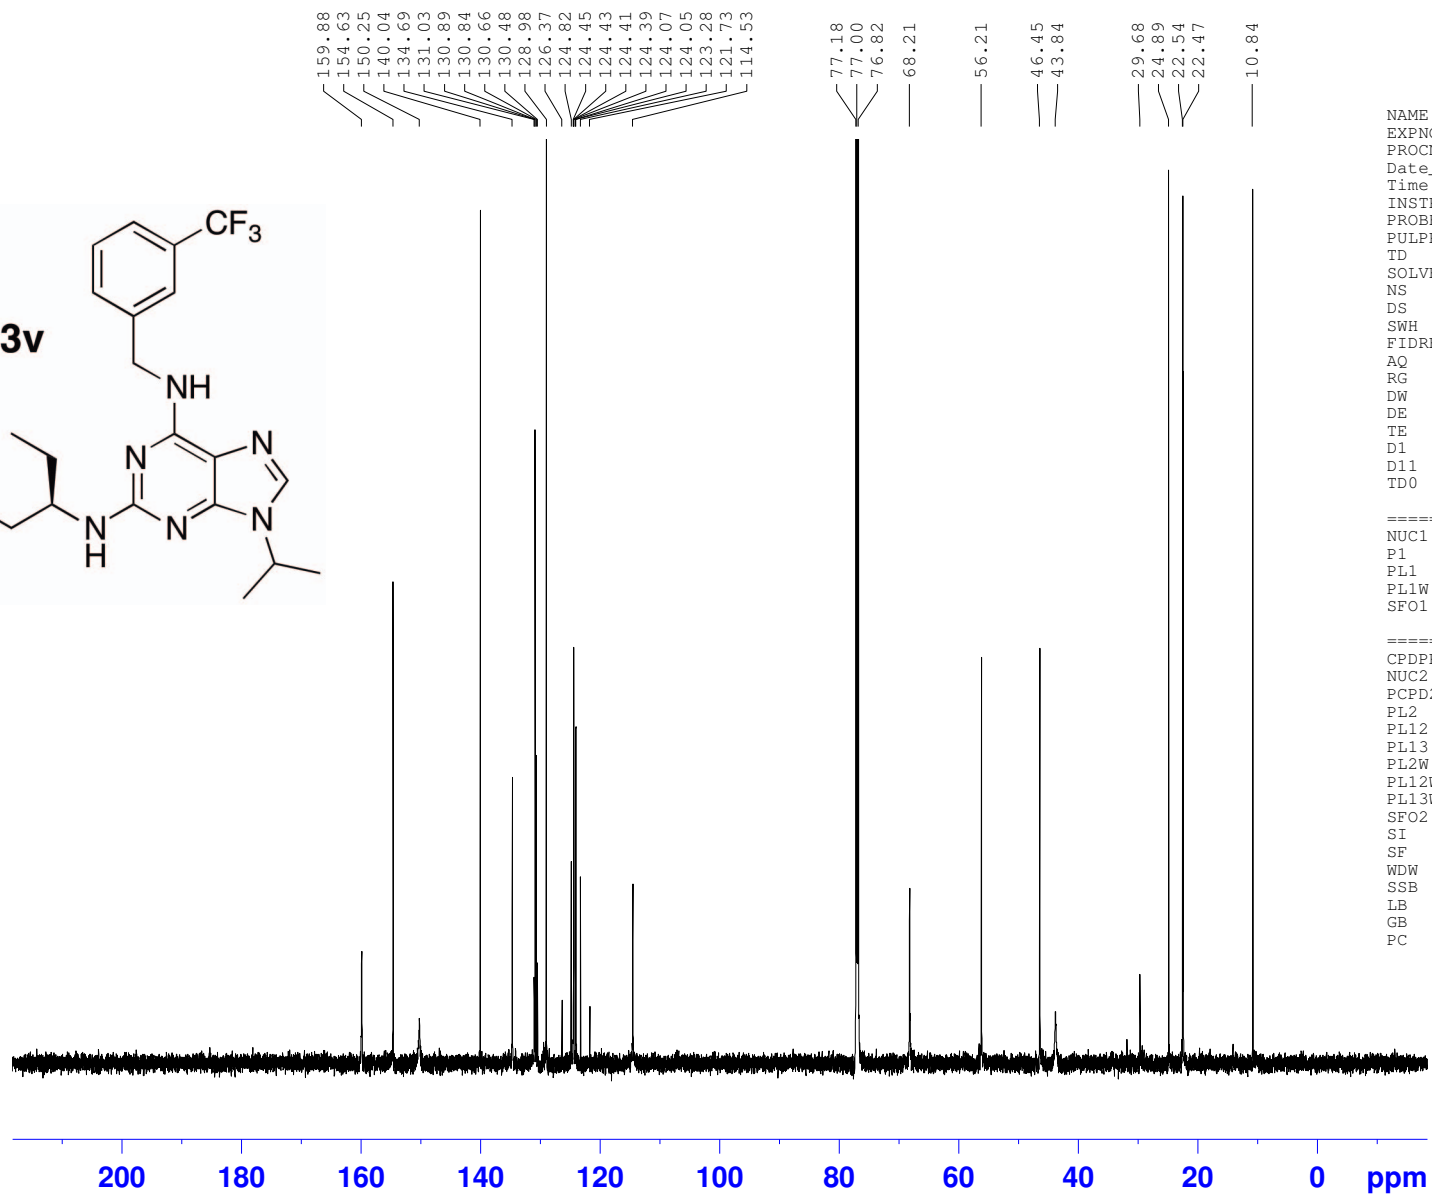

NAME mf-00417-030  
EXPNO 2  
PROCNO 1  
Date\_ 20120801  
Time\_ 20.13  
INSTRUM spect  
PROBHD 5 mm PATXI 1H-  
PULPROG zgpg  
TD 65536  
SOLVENT CDCl3  
NS 11297  
DS 4  
SWH 41666.668 Hz  
FIDRES 0.635783 Hz  
AQ 0.7864820 sec  
RG 2050  
DW 12.000 usec  
DE 6.50 usec  
TE 293.0 K  
D1 6.0000000 sec  
D11 0.0300000 sec  
TD0 18

===== CHANNEL f1 =====  
NUC1 13C  
P1 16.13 usec  
PL1 -3.00 dB  
PL1W 242.57461548 W  
SFO1 176.0453139 MHz

===== CHANNEL f2 =====  
CPDPRG2 waltz16  
NUC2 1H  
PCPD2 100.00 usec  
PL2 2.40 dB  
PL12 23.41 dB  
PL13 120.00 dB  
PL2W 13.05232048 W  
PL12W 0.10343982 W  
PL13W 0.00000000 W  
SFO2 700.0528002 MHz  
SI 32768  
SF 176.0277205 MHz  
WDW EM  
SSB 0  
LB 1.00 Hz  
GB 0  
PC 1.40

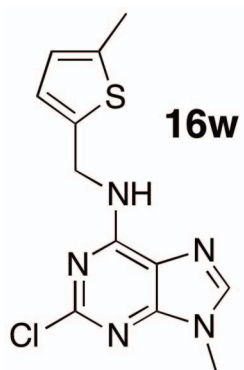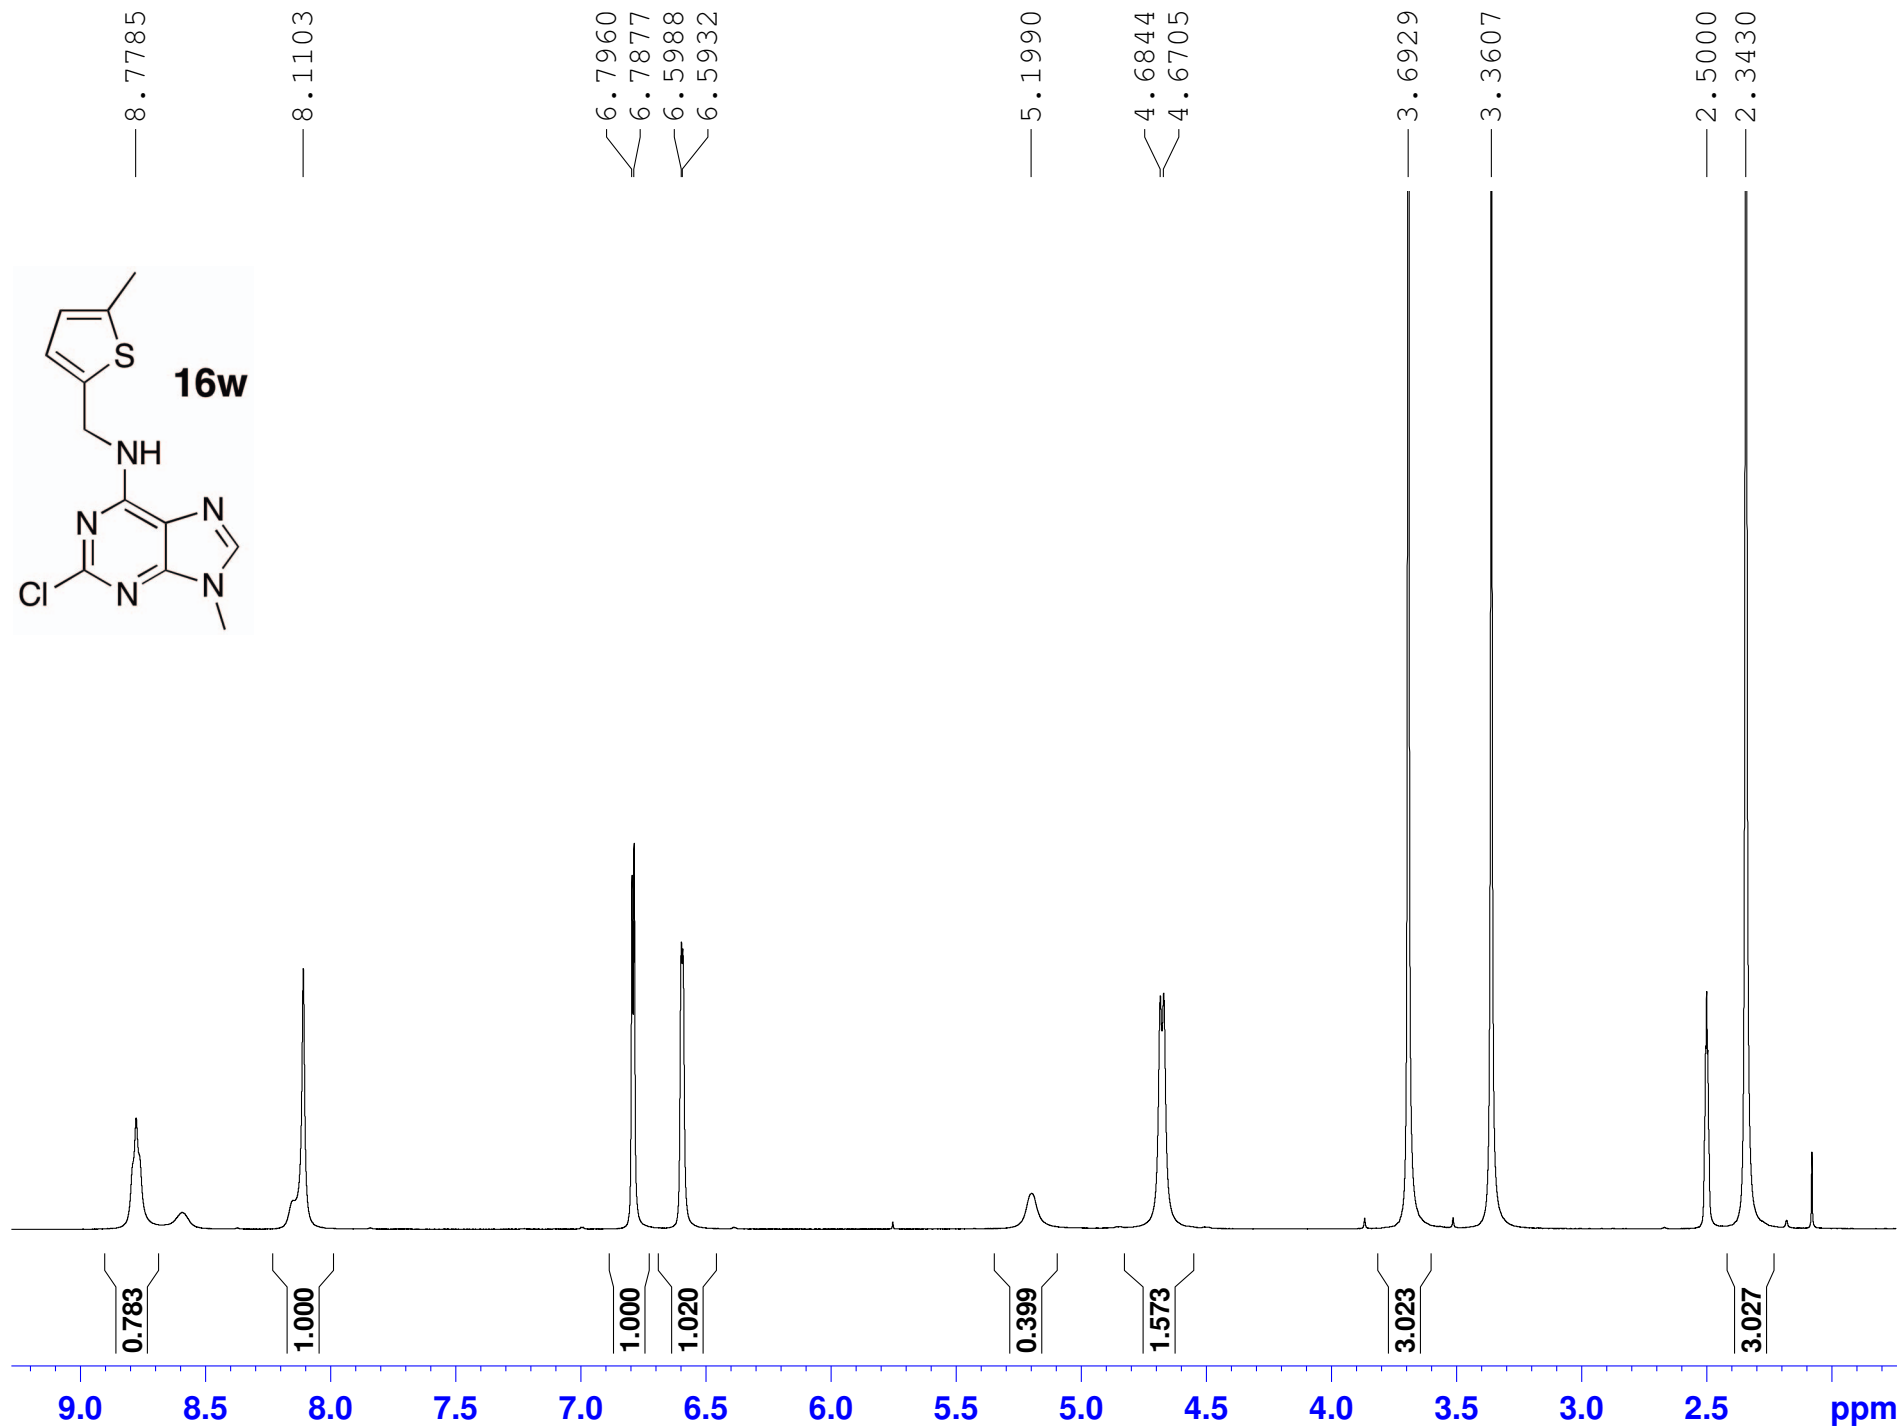

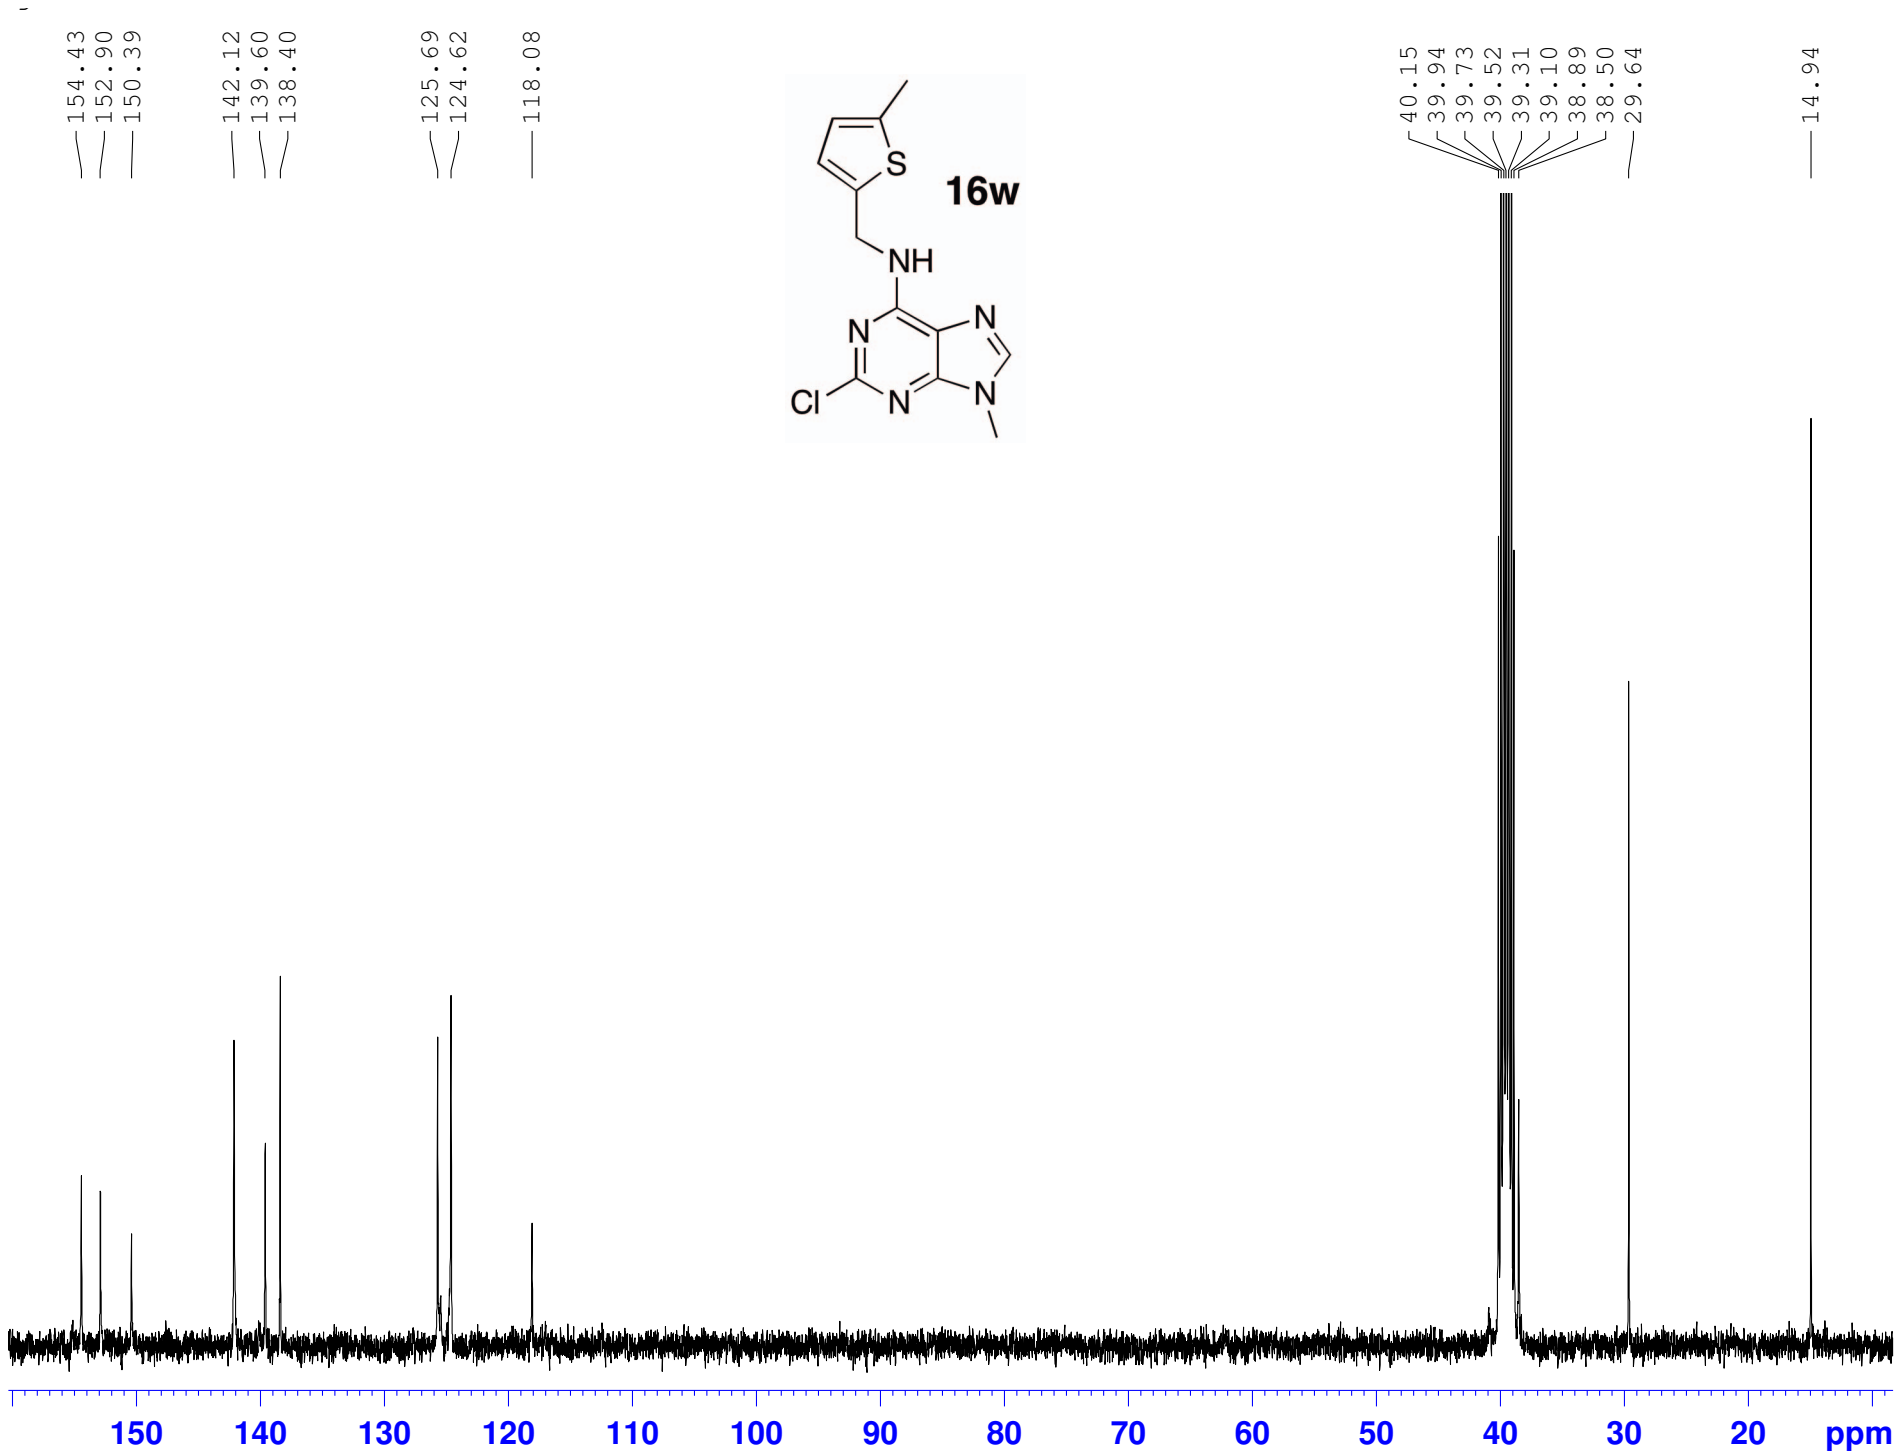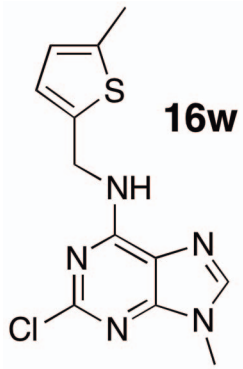

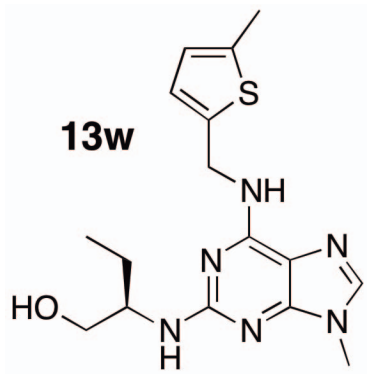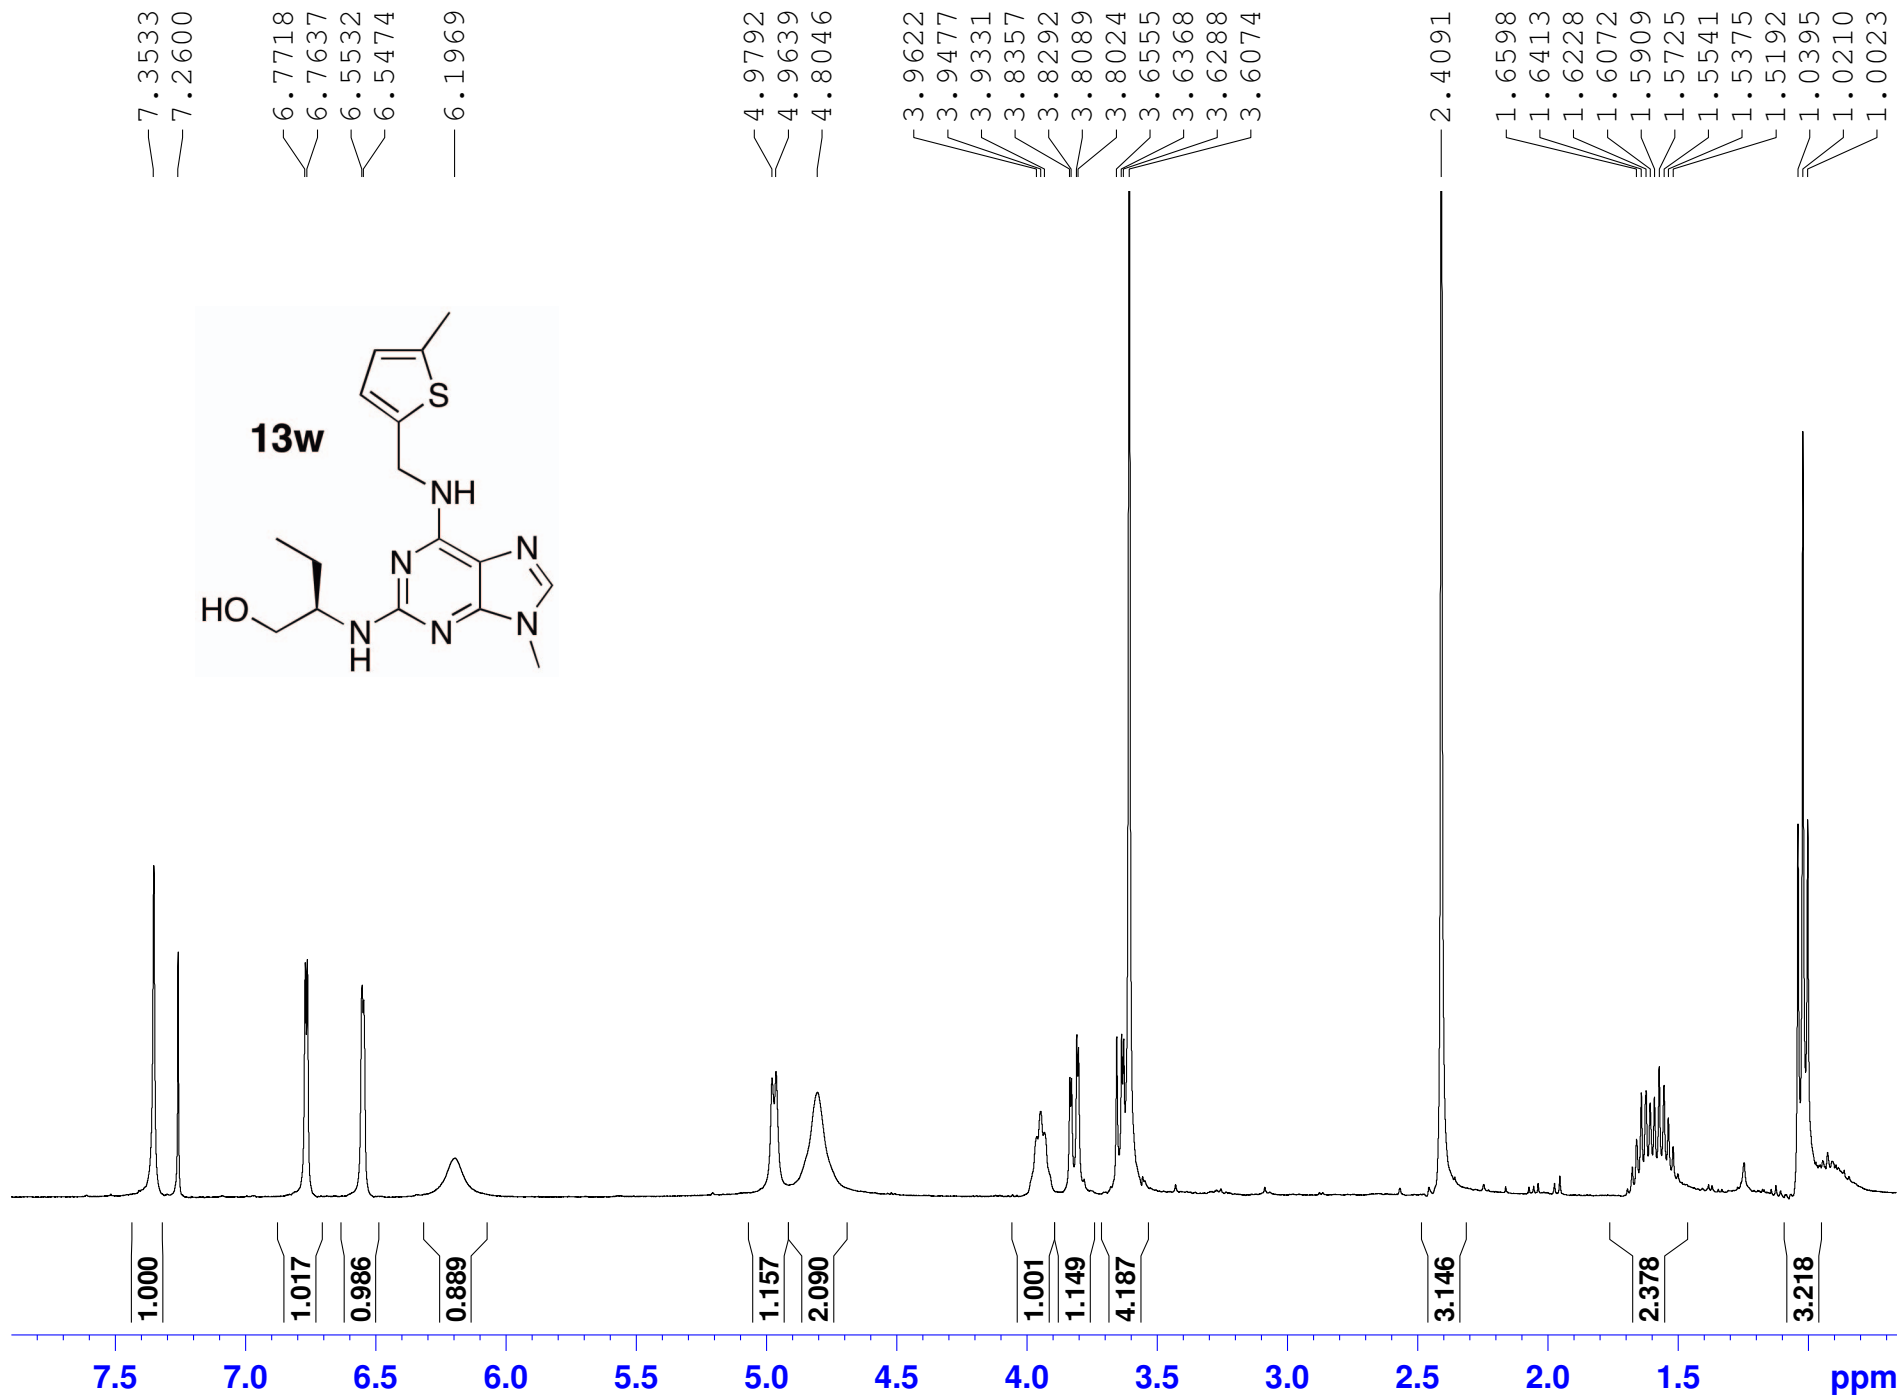

gv-NB-359.05 night 13C CDC13 400 B 100 MHz

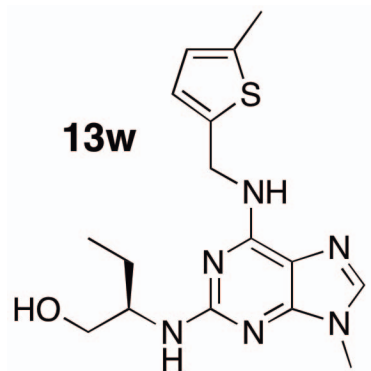

— 160.15

— 154.31

— 151.13

— 139.53

— 139.05

— 137.55

— 125.67

— 124.56

— 114.06

— 77.32

— 77.00

— 76.68

— 67.85

— 56.04

— 39.49

— 29.31

— 24.95

— 15.28

— 10.86

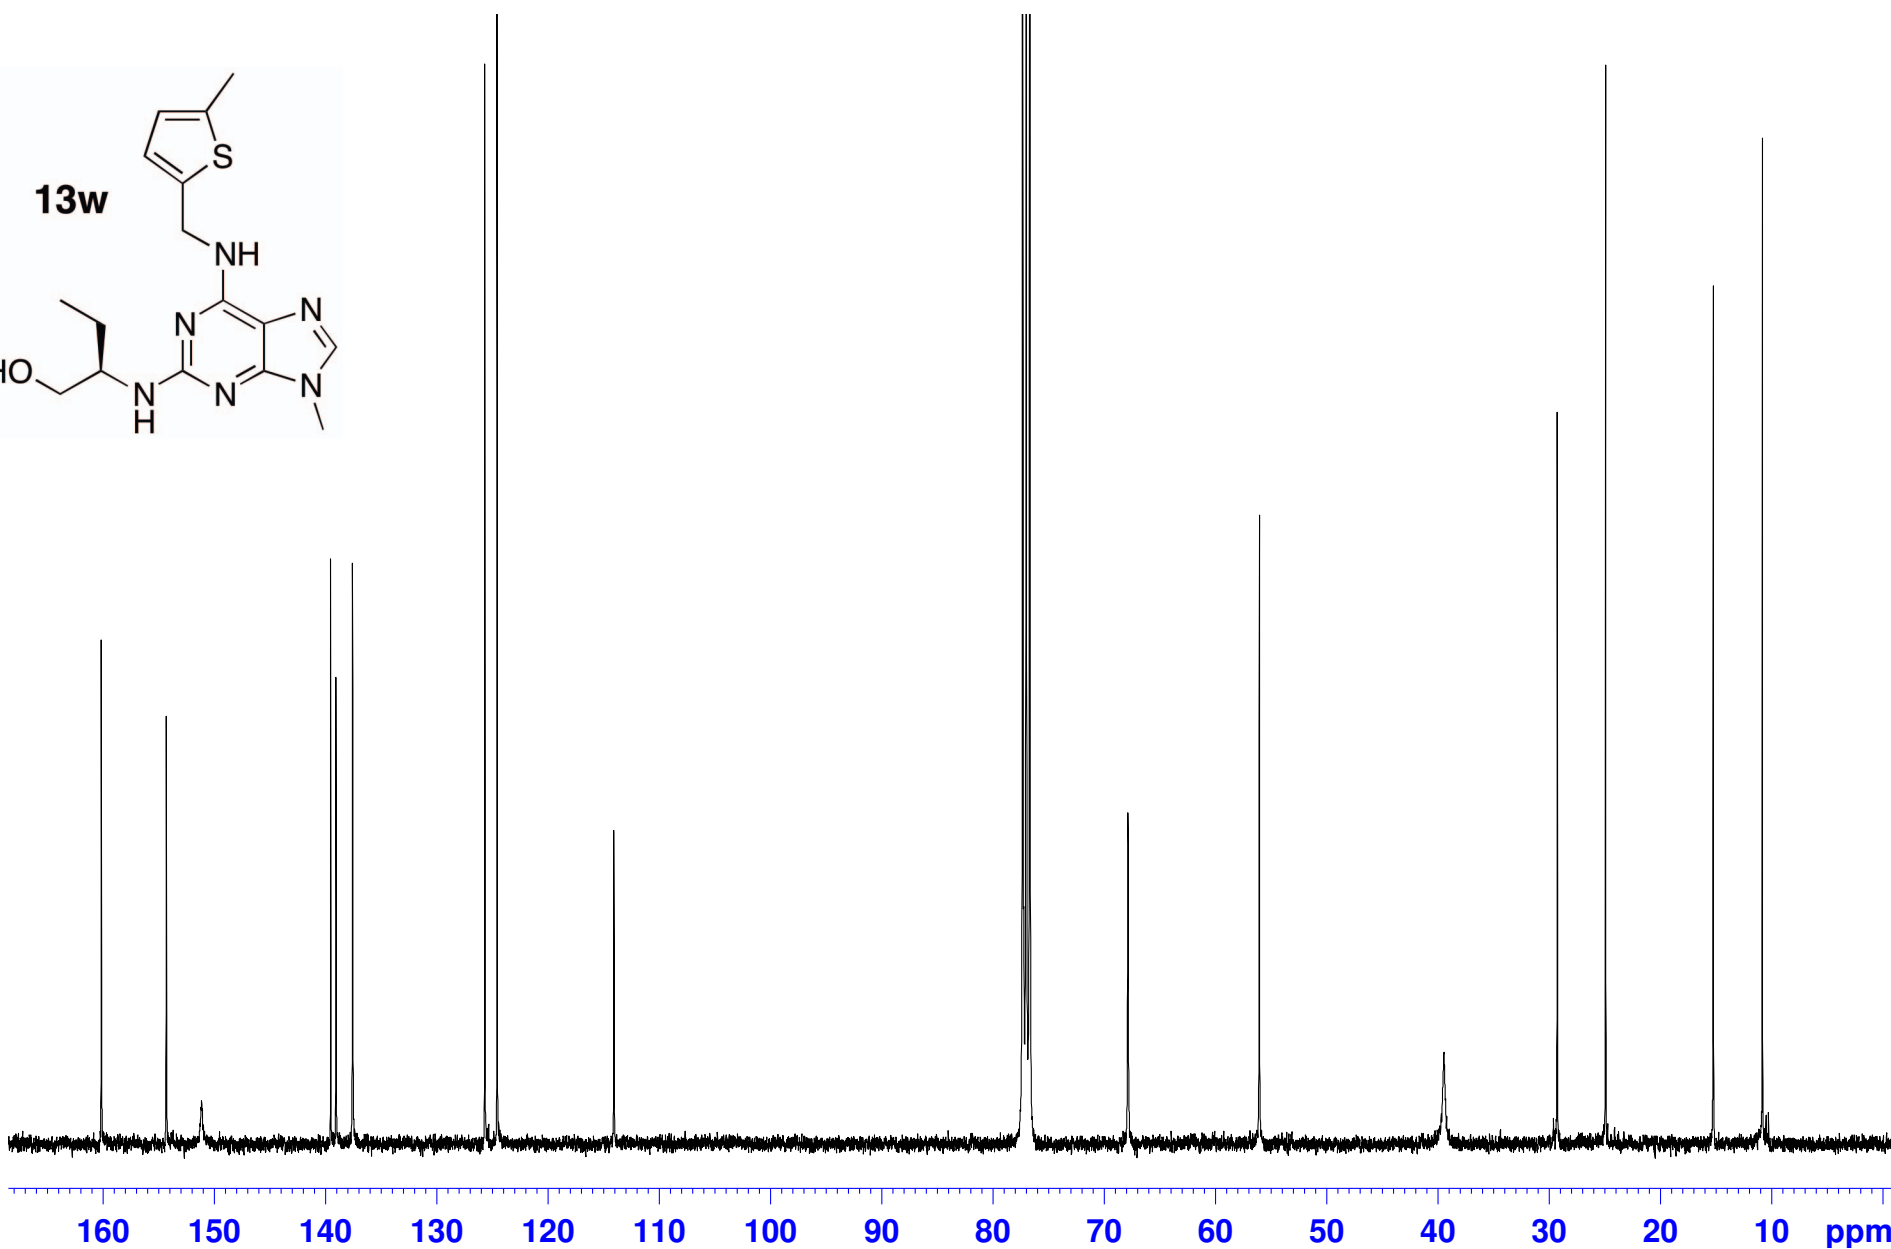

160

150

140

130

120

110

100

90

80

70

60

50

40

30

20

10

ppm



gv-NB-359.56, Column, CDCl3, 1H, 400 B

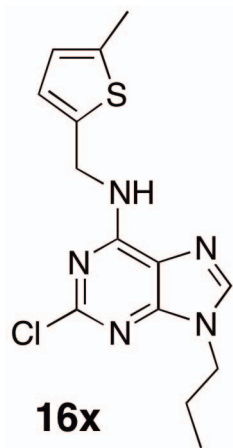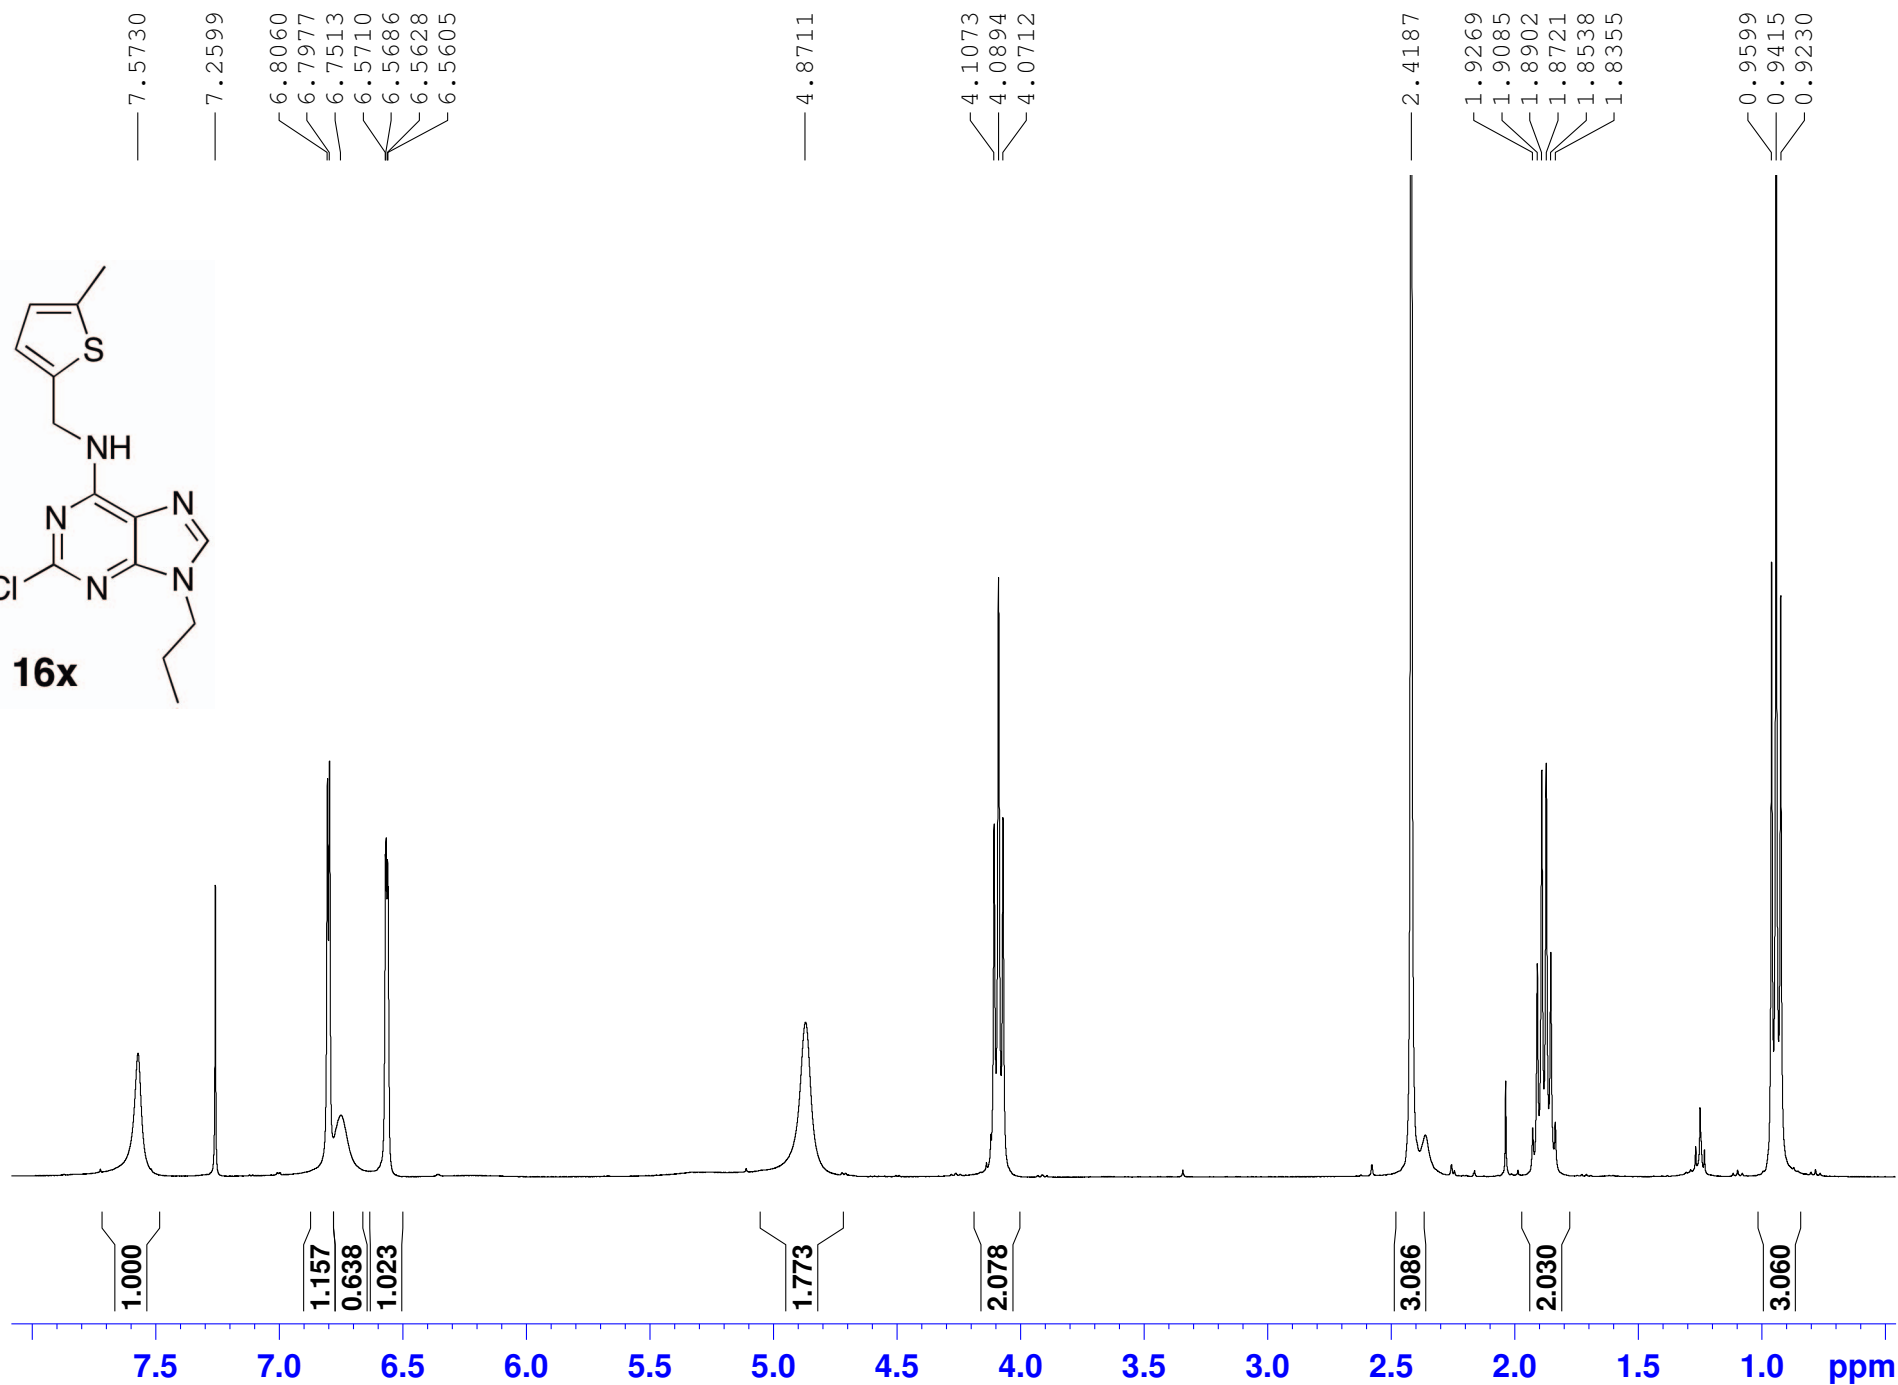

gv-NB-359.56, Column, CDCl3, 13C, 400 B

154.7571  
154.4831  
150.5363

140.3667  
140.1563  
138.1263

126.4279  
124.8907

118.7210

77.4782  
77.1602  
76.8428

45.6378

39.7688

23.4537

15.4684

11.2341

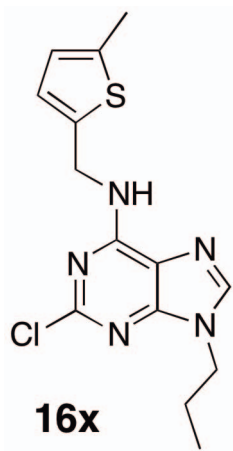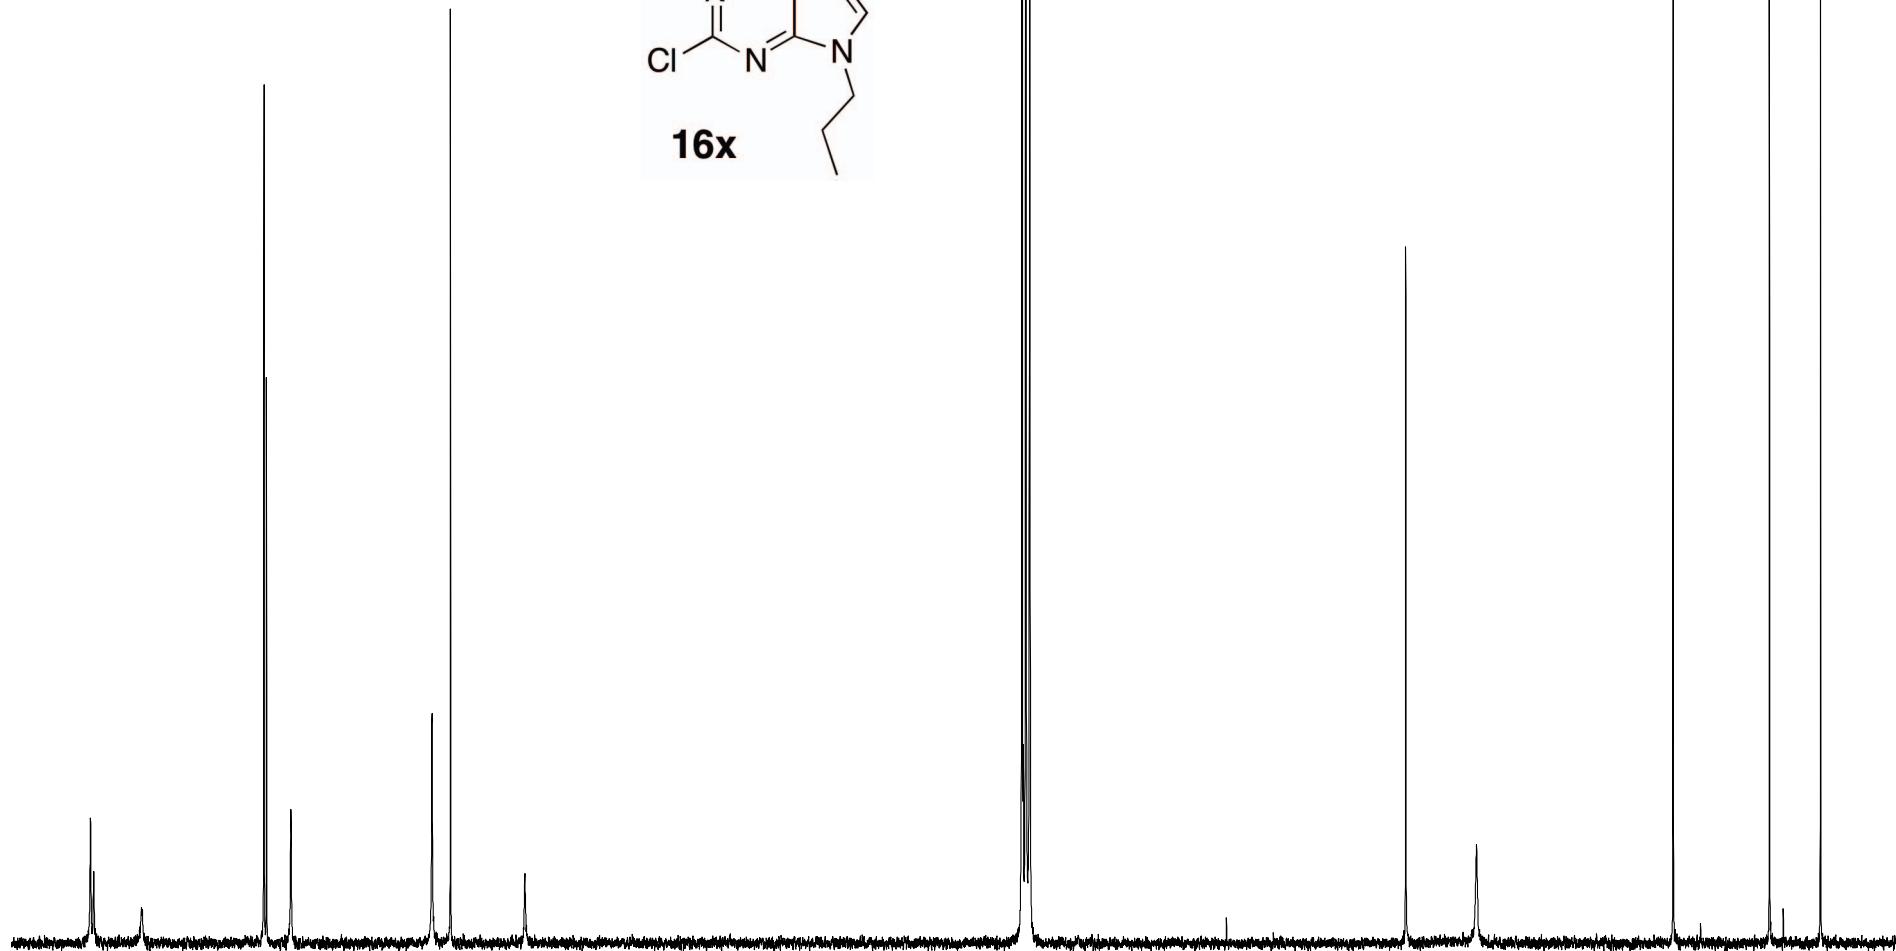

150 140 130 120 110 100 90 80 70 60 50 40 30 20 ppm

gv-NB-359.58, Column, CDCl3, 1H, 400 B

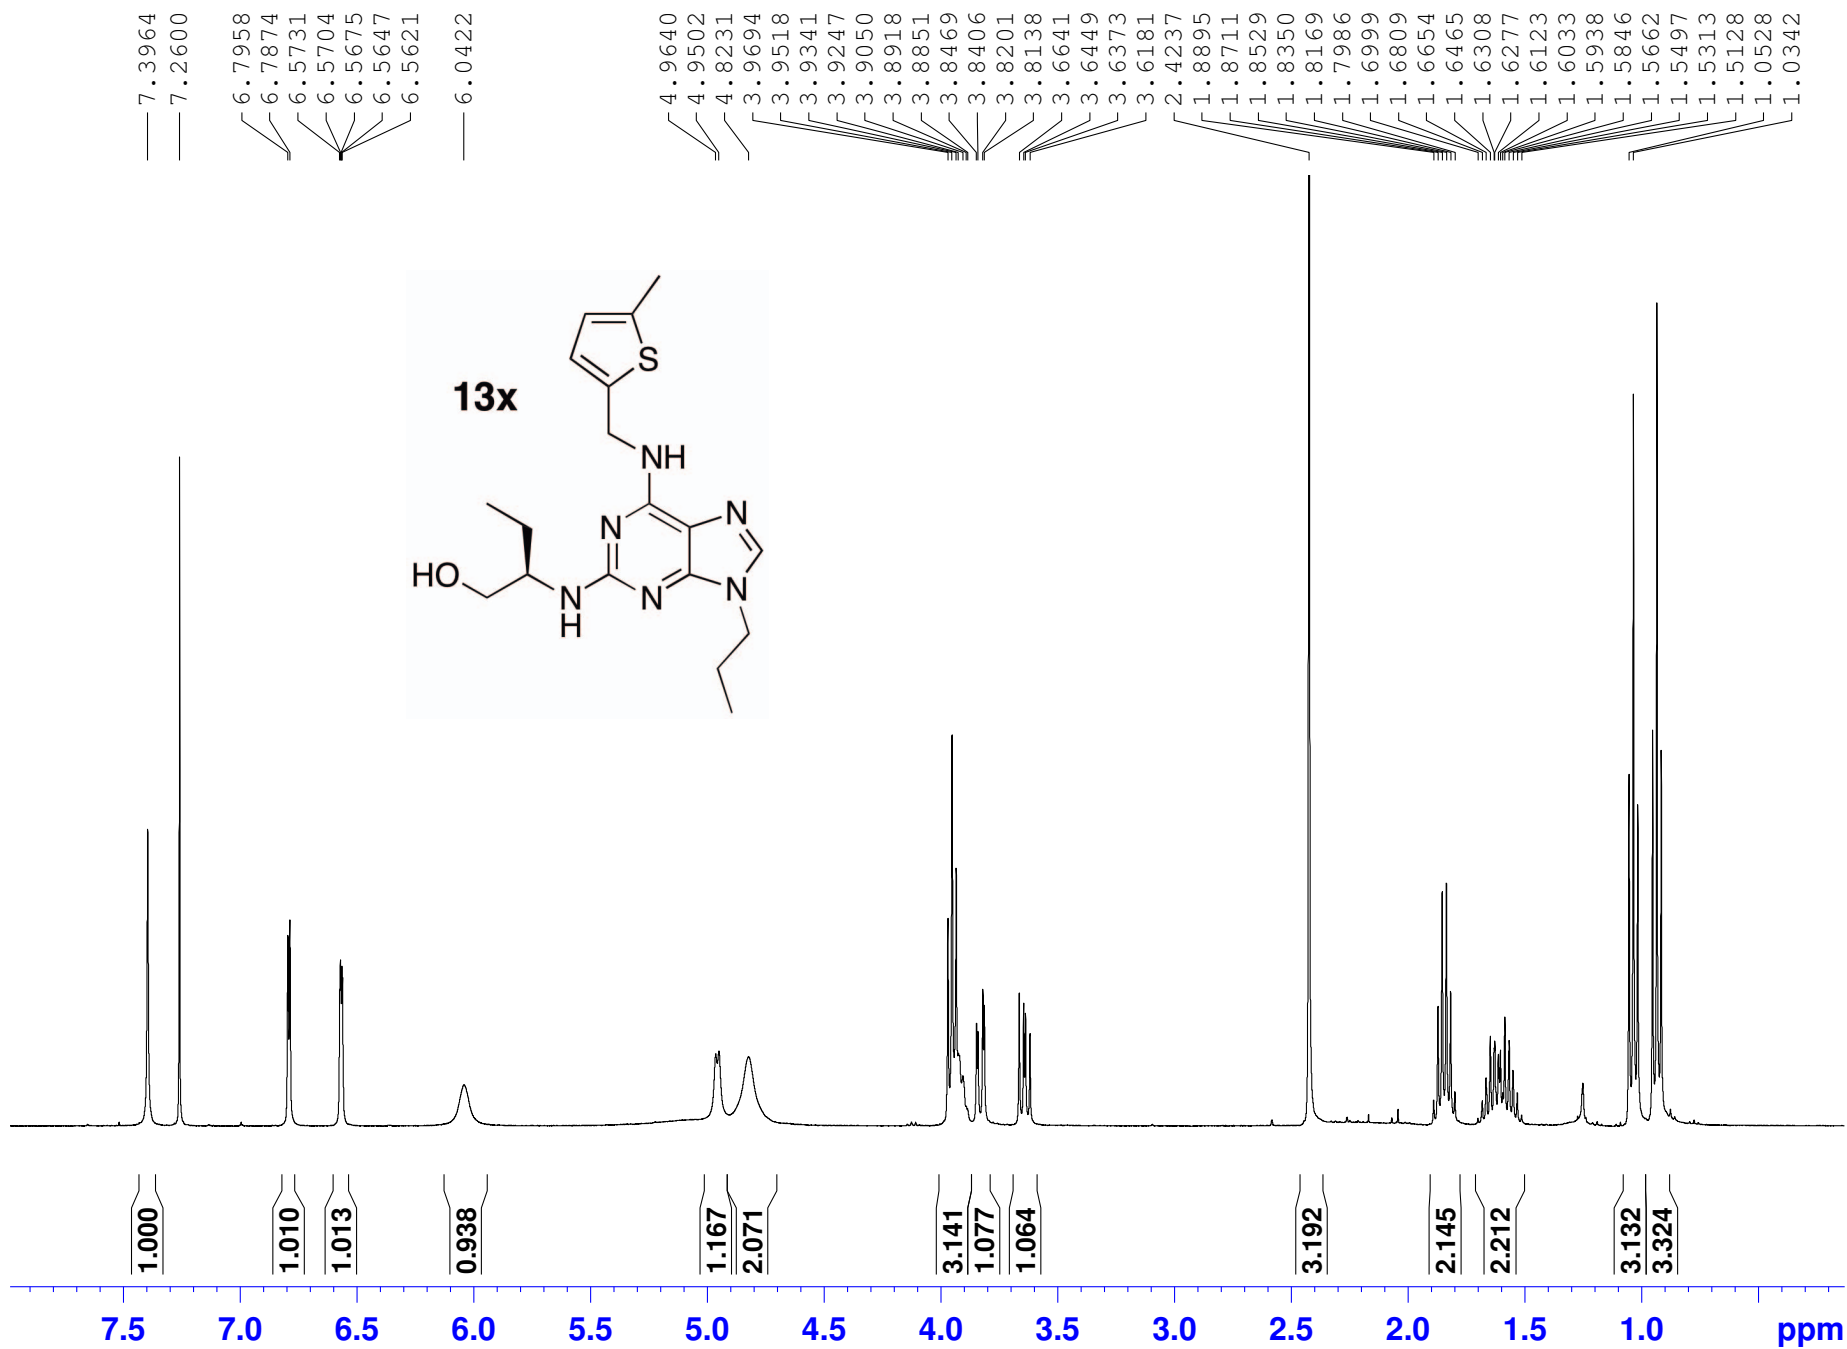

gv-NB-359.58, Column, CDC13, 13C, 400 B

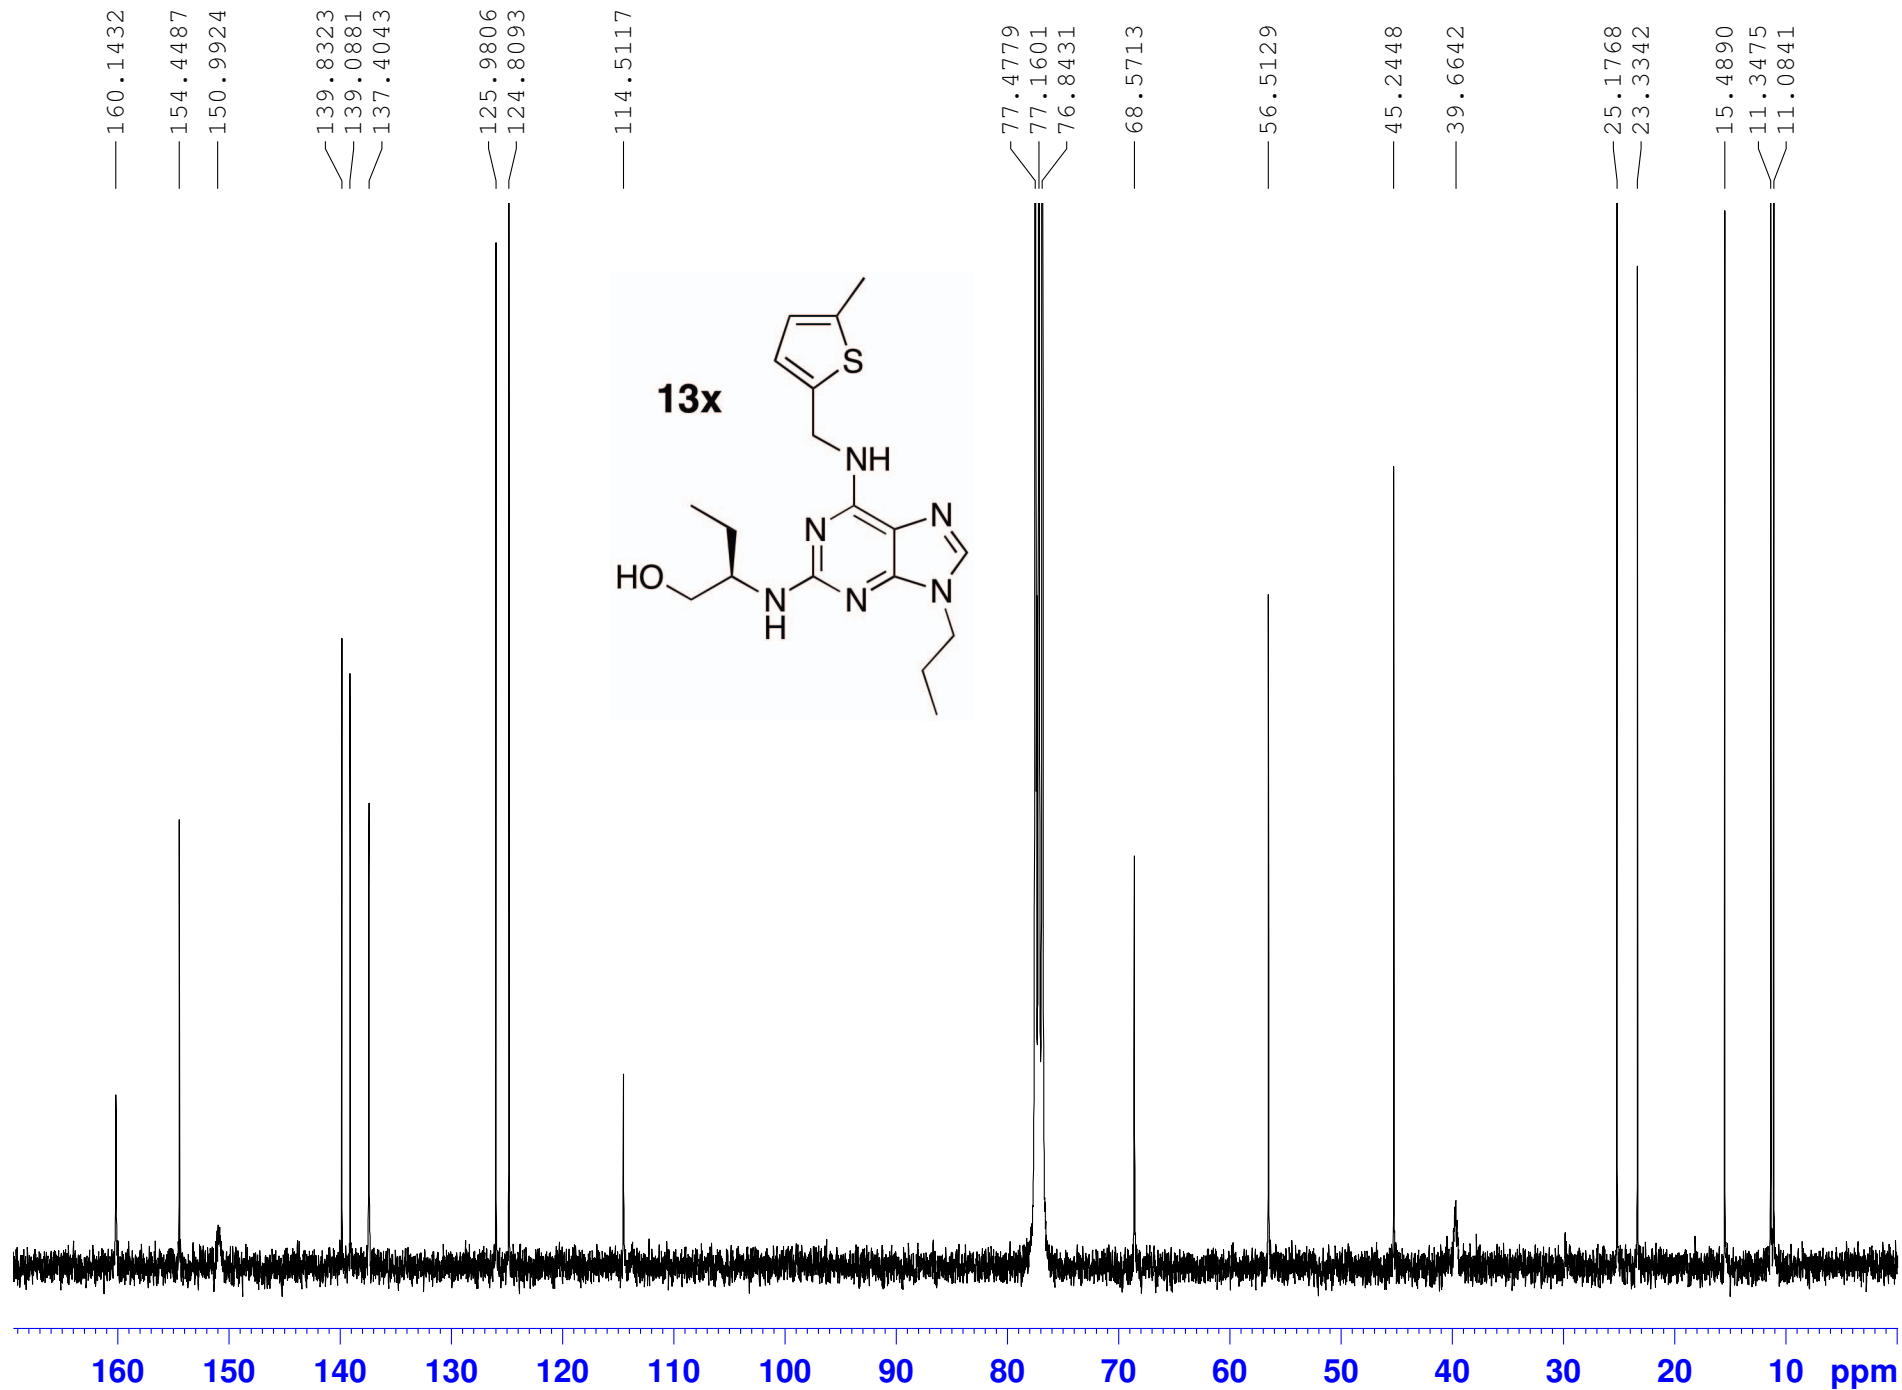

Supplement: ml3002083_si_001.pdf [file ml3002083_si_001.pdf]
